# Supplementary material for: Efficient synthesis of a library of heparin tri- and tetrasaccharides relevant to the substrate of heparanase
Source: Royal Society of Chemistry journal article supplement (doi:10.1039/c4qo00039k), 2014-01-01

## Supporting Information

### Efficient Synthesis of a Library of Heparin Tri- and Tetrasaccharides Relevant to the Substrates of Heparanase

Peng Xu, Weichang Xu, Yuanwei Dai, You Yang, and Biao Yu\*

*State Key Laboratory of Bio-organic and Natural Products Chemistry, Shanghai  
Institute of Organic Chemistry, Chinese Academy of Sciences, 345 Lingling road,  
Shanghai 200032, China. E-mail: [byu@mail.sioc.ac.cn](mailto:byu@mail.sioc.ac.cn)*

**General experimental procedures.** All reactions were carried out under nitrogen or argon with anhydrous solvents in flame-dried glassware, unless otherwise noted. All glycosylation reactions were performed in the presence of 4Å or 5Å molecular sieves, which were flame-dried immediately before use in the reaction under high vacuum. Glycosylation solvents were dried using a solvent purification system and used directly without further drying. The chemicals used were reagent grade as supplied, except where noted. Analytical thin-layer chromatography was performed using silica gel 60 F254 glass plates. Compound spots were visualized by UV light (254 nm) or by heating with a solution with 10% H<sub>2</sub>SO<sub>4</sub> in ethanol. Flash column chromatography was performed on silica gel H. NMR spectra were referenced using Me<sub>4</sub>Si (0 ppm), residual CHCl<sub>3</sub> (<sup>1</sup>H NMR  $\delta$  = 7.26 ppm, <sup>13</sup>C NMR  $\delta$  = 77.16 ppm), CD<sub>3</sub>OD (<sup>1</sup>H NMR  $\delta$  = 3.31 ppm, <sup>13</sup>C NMR  $\delta$  = 49.00 ppm), D<sub>2</sub>O (<sup>1</sup>H NMR  $\delta$  = 4.79 ppm). Peak and coupling constant assignments are based on <sup>1</sup>H NMR, <sup>1</sup>H–<sup>1</sup>H COSY, and <sup>1</sup>H–<sup>13</sup>C HMQC experiments. All optical rotations were measured at room temperature using the sodium D line. Splitting patterns are indicated as s (singlet), d (doublet), t (triplet), q (quartet), and brs (broad singlet) for <sup>1</sup>H NMR data. ESI-MS and MALDI-MS were run on an IonSpec Ultra instrument using HP5989A or VG Quattro MS. Optical rotations were measured using a Perkin-Elmer 241 polarimeter.

#### **2-*O*-Benzoyl-3-*O*-benzyl-4,6-*O*-benzylidene- $\beta$ -D-glucopyranosyl trichloroacetimidate (21)**

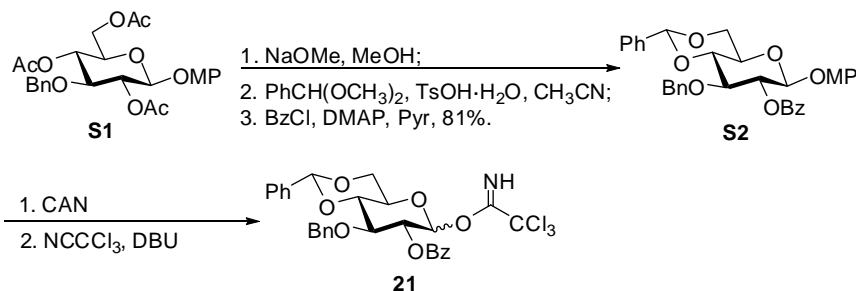

#### 4-Methoxyphenyl

##### 2-*O*-benzoyl-3-*O*-benzyl-4,6-*O*-benzylidene- $\beta$ -D-glucopyranoside (**S2**)

4-Methoxyphenyl 2,4,6-tri-*O*-acetyl-3-*O*-benzyl- $\beta$ -D-glucopyranoside (**S1**)<sup>S5</sup> (20.0 g, 40 mmol) was dissolved in methanol (100 mL), NaOMe was added until pH = 12. After the TLC indication of complete consumption of the starting material, acidic resin was added and the mixture was stirred until pH = 7. The resin was filtered off and the solution was removed in vacuo. The residue was co-evaporated twice with toluene and dissolved in acetonitrile (100 mL). Benzaldehyde dimethyl acetal (7.5 mL, 48 mmol) and *p*-toluenesulfonic acid monohydrate (100 mg) were added, stirring was continued until TLC indicated disappearance of the raw material. Triethylamine was added and the solvent was evaporated. Crystallization from methanol afforded 4-methoxyphenyl 3-*O*-benzyl-4,6-*O*-benzylidene- $\beta$ -D-glucopyranoside.

Benzoyl chloride (9.5 mL, 82 mmol) was added to a solution of the above product in CH<sub>2</sub>Cl<sub>2</sub> (160 mL) and pyridine (80 mL) at 0 °C. Stirring was continued at 0 °C until TLC indicated disappearance of the starting material. The reaction mixture was quenched by the addition of methanol. The mixture was poured into CH<sub>2</sub>Cl<sub>2</sub>, and washed with brine twice. The organic layers were dried over Na<sub>2</sub>SO<sub>4</sub> and filtered. The filtrate was concentrated in vacuo. Crystallization from petroleum ether/EtOAc afforded **S2** (18.4 g, 81%) as a white crystal:  $[\alpha]_D^{24} = 40.6$  (*c* 1.9, CHCl<sub>3</sub>); <sup>1</sup>H NMR (400 MHz, CDCl<sub>3</sub>)  $\delta$  8.09–7.93 (m, 2 H), 7.67–7.33 (m, 8 H), 7.21–7.03 (m, 5 H), 6.88 (d, *J* = 9.0 Hz, 2 H), 6.74 (d, *J* = 9.0 Hz, 2 H), 5.62 (s, 1 H), 5.59–5.46 (m, 1 H), 5.07 (d, *J* = 7.8 Hz, 1 H), 4.85 (d, *J* = 12.0 Hz, 1 H), 4.72 (d, *J* = 12.1 Hz, 1 H), 4.41 (dd, *J* = 10.5, 4.9 Hz, 1 H), 4.02–3.83 (m, 3 H), 3.71 (s, 3 H), 3.66–3.53 (m, 1 H); <sup>13</sup>C NMR (100 MHz, CDCl<sub>3</sub>)  $\delta$  165.2, 155.8, 151.3, 137.9, 137.3, 133.3, 130.0, 129.9, 129.2, 128.5, 128.4, 128.3, 128.2, 127.7, 126.2, 119.0, 114.6, 101.6, 101.5, 81.6, 78.1, 74.2, 73.5, 68.8, 66.6, 55.7; ESI-MS *m/z* 591.2 [M+Na<sup>+</sup>]; ESI-MS *m/z* calcd for C<sub>34</sub>H<sub>32</sub>O<sub>8</sub>Na [M+Na]<sup>+</sup> 591.1985, found 591.1989.

##### 2-*O*-Benzoyl-3-*O*-benzyl-4,6-*O*-benzylidene- $\beta$ -D-glucopyranosyl trichloroacetimidate (**21**)

Compound **S2** (4.0 g, 7.0 mmol) was dissolved in a mixed solvent of acetonitrile, toluene, and water (70 mL, v/v/v = 1:1.5:1). Cerous ammonium nitrate (11.5 g, 21 mmol) was added at room temperature. Stirring was continued until TLC indicated disappearance of the raw material. The solvent was removed in vacuo. The residue

was dissolved in CH<sub>2</sub>Cl<sub>2</sub>, and washed with water, saturated sodium bicarbonate, and brine. The organic layers were dried over Na<sub>2</sub>SO<sub>4</sub> and filtered. The filtrate was concentrated in vacuo. The residue was purified by silica gel column chromatography (petroleum ether/EtOAc = 3:1) to give the hemiacetal (2.9 g, 91%) as a light red solid.

The hemiacetal (2.1 g, 4.5 mmol) was dissolved in CH<sub>2</sub>Cl<sub>2</sub> (20 mL) and cooled to 0 °C. Trichloroacetonitrile (2.3 mL, 23 mmol) and DBU (67 µL, 0.45 mmol) were added successively. After stirring at this temperature for about 2 h, the reaction mixture was concentrated in vacuo. The residue was chromatographed over silica gel (petroleum ether/EtOAc = 5:1, containing 1% Et<sub>3</sub>N) to yield **21** (2.7 g, 98%) as a white foam: <sup>1</sup>H NMR (400 MHz, CDCl<sub>3</sub>) δ 8.52 (s, 1 H), 7.97 (d, *J* = 7.8 Hz, 2 H), 7.67–7.49 (m, 3 H), 7.49–7.34 (m, 6 H), 7.31–7.11 (m, 6 H), 6.62 (d, *J* = 3.2 Hz, 1 H), 5.66 (s, 1 H), 5.38 (dd, *J* = 9.3, 3.2 Hz, 1 H), 4.92 (d, *J* = 11.8 Hz, 1 H), 4.79 (d, *J* = 11.8 Hz, 1 H), 4.39 (dd, *J* = 10.4, 4.8 Hz, 1 H), 4.31 (t, *J* = 9.5 Hz, 1 H), 4.13 (td, *J* = 10.2, 5.2 Hz, 1 H), 3.92 (t, *J* = 9.5 Hz, 1 H), 3.84 (t, *J* = 10.3 Hz, 1 H); <sup>13</sup>C NMR (100 MHz, CDCl<sub>3</sub>) δ 165.6, 160.8, 138.0, 137.1, 133.6, 130.0, 129.2, 128.5, 128.5, 128.4, 128.3, 127.8, 126.1, 101.6, 94.2, 81.7, 77.5, 77.2, 76.8, 75.3, 74.9, 72.1, 68.8, 65.4. ESI-MS *m/z* 628.0 [M+Na]<sup>+</sup>.

## 2-*O*-Levulinic-3-*O*-benzyl-4,6-*O*-benzylidene-β-*D*-glucopyranosyl trichloroacetimidate (**22**)

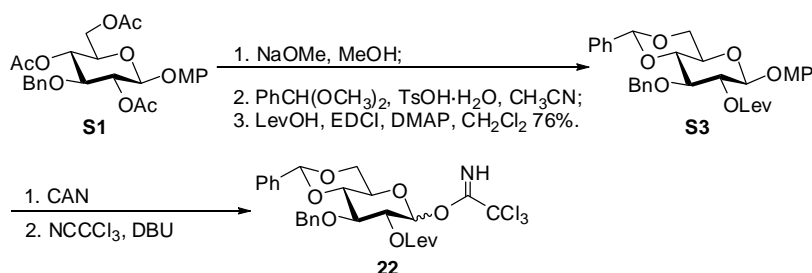

## 4-Methoxyphenyl

### 2-*O*-levulinic-3-*O*-benzyl-4,6-*O*-benzylidene-β-*D*-glucopyranoside (**S3**)

Compound **S1** (2.0 g, 4.0 mmol) was dissolved in methanol (10 mL), and NaOMe was added until pH = 12. After the TLC indication of complete consumption of the starting material, acidic resin was added and the mixture was stirred until pH = 7. The resin was filtered off and the solvent was removed in vacuo. The residue was co-evaporated twice with toluene and dissolved in acetonitrile (10 mL). Benzaldehyde dimethyl acetal (0.75 mL, 4.8 mmol) and *p*-toluenesulfonic acid monohydrate (10 mg) was added, stirring was continued until TLC indicated disappearance of the raw material. Triethylamine was added and the solvents evaporated. Crystallization from methanol afforded 4-methoxyphenyl 3-*O*-benzyl-4,6-*O*-benzylidene-β-*D*-glucopyranoside.

The above product was dissolved in CH<sub>2</sub>Cl<sub>2</sub> (10 mL) under nitrogen. EDCI (1.5 g, 8.0 mmol), DMAP (50 mg, 0.4 mmol), levulinic acid (0.6 mL, 6 mmol) were added.

The stirring was continued until TLC indicated disappearance of the starting material. The mixture was poured into CH<sub>2</sub>Cl<sub>2</sub>, and washed with brine twice. The organic layers were dried over Na<sub>2</sub>SO<sub>4</sub> and filtered. The filtrate was concentrated in vacuo. Crystallization from petroleum ether/EtOAc afforded **S3** (1.5 g, 76%) as a white solid:  $[\alpha]_D^{24} = 3.7$  (*c* 1.0, CHCl<sub>3</sub>); <sup>1</sup>H NMR (300 MHz, CDCl<sub>3</sub>)  $\delta$  7.50-7.26 (m, 10 H), 6.96 (d, *J* = 9.0 Hz, 2 H), 6.82 (d, *J* = 9.3 Hz, 2 H), 5.61 (s, 1 H), 5.25 (t, *J* = 8.7 Hz, 1 H), 4.94-4.87 (m, 2 H), 4.72 (d, *J* = 11.7 Hz, 1 H), 4.39 (dd, *J* = 10.8, 5.4 Hz, 1 H), 3.90-3.75 (m, 6 H), 3.58-3.50 (m, 1 H), 2.75-2.71 (m, 2 H), 2.57-2.51 (m, 2 H), 2.17 (s, 3 H); <sup>13</sup>C NMR (100 MHz, CDCl<sub>3</sub>)  $\delta$  206.2, 171.4, 155.7, 151.2, 138.2, 137.2, 129.1, 128.4, 128.0, 127.8, 126.1, 118.8, 114.6, 101.3, 101.3, 81.3, 78.3, 74.21, 73.1, 68.7, 66.4, 55.7, 37.8, 29.9, 27.9; ESI-MS *m/z* calcd for C<sub>32</sub>H<sub>34</sub>O<sub>9</sub>Na [M+Na]<sup>+</sup> 585.2095, found 585.2083.

**2-*O*-Levulinic-3-*O*-benzyl-4,6-*O*-benzylidene- $\beta$ -D-glucopyranosyl trichloroacetimidate (**22**)**

Compound **S3** (1.4 g, 2.5 mmol) was dissolved in a mixed solvent of acetonitrile, toluene, and water (21 mL, v/v/v = 1:1.5:1). Cerous ammonium nitrate (4.1 g, 7.5 mmol) was added at room temperature. Stirring was continued until TLC indicated disappearance of the raw material. The solution was removed in vacuo and the residue was dissolve in CH<sub>2</sub>Cl<sub>2</sub>, and washed with water, saturated sodium bicarbonate, and brine. The organic layers were dried over Na<sub>2</sub>SO<sub>4</sub> and filtered. The filtrate was concentrated in vacuo. The residue was purified by silica gel column chromatography (petroleum ether/EtOAc = 3:1) to give the hemiacetal (1.1 g, 83%) as light red solid: ESI-MS (*m/z*): 479.4 [M+Na]<sup>+</sup>.

The above product (0.9 g, 2.0 mmol) was dissolved in CH<sub>2</sub>Cl<sub>2</sub> (5 mL) and cooled to 0 °C. Trichloroacetonitrile (0.2 mL, 1.0 mmol) and DBU (cat.) were added successively. After stirring at this temperature for about 2 h, the reaction mixture was concentrated in vacuo. The residue was chromatographed over silica gel (petroleum ether/EtOAc = 4:1, containing 1% Et<sub>3</sub>N) to yield **22** (1.13 g, 94 %) as a colorless oil: <sup>1</sup>H NMR (400 MHz, CDCl<sub>3</sub>)  $\delta$  8.56 (s, 1H), 7.50–7.15 (m, 14 H), 6.42 (d, *J* = 3.7 Hz, 1 H), 5.55 (s, 1 H), 5.03 (dd, *J* = 9.6, 3.8 Hz, 1 H), 4.86 (d, *J* = 11.8 Hz, 1 H), 4.69 (d, *J* = 11.7 Hz, 1 H), 4.28 (dd, *J* = 10.4, 4.9 Hz, 1 H), 4.12–3.93 (m, 2 H), 3.79–3.67 (m, 2 H), 2.62 (td, *J* = 6.7, 2.9 Hz, 2 H), 2.52–2.35 (m, 3 H), 2.08 (s, 3 H); <sup>13</sup>C NMR (100 MHz, CDCl<sub>3</sub>)  $\delta$  206.1, 172.0, 161.0, 138.3, 137.1, 129.2, 128.4, 128.1, 127.9, 126.1, 101.5, 94.0, 81.5, 75.6, 75.0, 72.0, 68.7, 65.3, 37.8, 30.0, 27.7.

**2-*O*-Benzoyl-3-*O*-benzyl-4,6-*O*-benzylidene- $\alpha$ -L-iduopyranosyl trichloroacetimidate (**23**)**

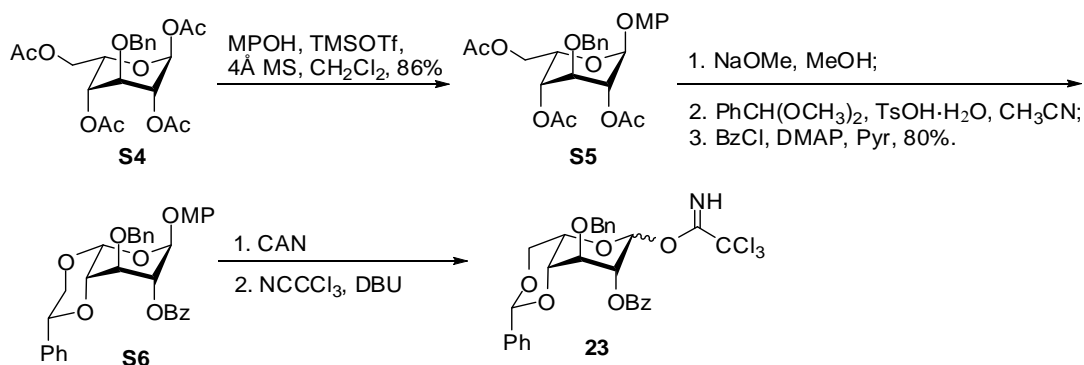

#### 4-Methoxyphenyl 2,4,6-tri-*O*-acetyl-3-*O*-benzyl- $\alpha$ -L-iduopyranoside (**S5**)

*p*-Methoxyphenol (1.86 g, 15 mmol) and 1,2,4,6-tetra-*O*-acetyl-3-*O*-benzyl- $\alpha$ -L-iduopyranoside (**S4**)<sup>S4</sup> (4.4 g, 10 mmol) were dissolved in CH<sub>2</sub>Cl<sub>2</sub> at rt. Powdered freshly activated 4Å molecular sieves (6 g) were added, and the mixture was stirred for 1 hour at ambient temperature and then cooled to 0 °C. TMSOTf (0.64 mL, 5 mmol) was added, and the stirring was continued until TLC indicated the disappearance of the starting material (about 12 h). The reaction was quenched by the addition of Et<sub>3</sub>N. The mixture was filtered, the filtrate was concentrated in vacuo. Crystallization from petroleum ether/EtOAc afforded **S5** (4.3 g, 86%) as a white solid:  $[\alpha]_D^{25} = -81.5$  (*c* 1.4, CHCl<sub>3</sub>); <sup>1</sup>H NMR (400 MHz, CDCl<sub>3</sub>)  $\delta$  7.50–7.28 (m, 5 H), 7.11–6.91 (m, 2 H), 6.92–6.70 (m, 2 H), 5.44 (s, 1 H), 5.16 (d, *J* = 1.1 Hz, 1 H), 4.94 (s, 1 H), 4.86 (d, *J* = 11.9 Hz, 1 H), 4.73 (d, *J* = 11.9 Hz, 1 H), 4.65 (t, *J* = 6.4 Hz, 1 H), 4.26–4.07 (m, 2 H), 3.81 (s, 1 H), 3.77 (s, 3 H), 2.11 (d, *J* = 4.4 Hz, 6 H), 1.93 (s, 3 H); <sup>13</sup>C NMR (100 MHz, CDCl<sub>3</sub>)  $\delta$  170.58, 170.16, 169.61, 155.30, 150.49, 137.68, 128.54, 127.98, 127.73, 118.40, 114.63, 97.32, 72.57, 72.27, 67.33, 67.14, 64.62, 62.62, 55.77; ESI-MS *m/z* calcd for C<sub>26</sub>H<sub>30</sub>O<sub>10</sub>Na [M+Na]<sup>+</sup> 525.1731, found 525.1746.

#### 4-Methoxyphenyl

##### 2-*O*-benzoyl-3-*O*-benzyl-4,6-*O*-benzylidene- $\alpha$ -L-iduopyranoside (**S6**)

Compound **S5** (4.0 g, 4.0 mmol) was dissolved in methanol (20 mL), and NaOMe was added until pH = 12. After the TLC indication of complete consumption of the starting material, acidic resin was added and the mixture was stirred until pH = 7. The resin was filtered off and the solvent was removed in vacuo. The residue was co-evaporated twice with toluene and then dissolved in benzaldehyde (12 mL). Trifluoroacetic acid (0.8 mL) was added, stirring was continued until TLC indicated disappearance of the raw material. Triethylamine was added and the solvent was evaporated to afford the crude 4-methoxyphenyl 3-*O*-benzyl-4,6-*O*-benzylidene- $\beta$ -L-iduopyranoside as a yellow solid.

Benzoyl chloride (1.4 mL, 12 mmol) was added to a solution of the above product in CH<sub>2</sub>Cl<sub>2</sub> (40 mL) and pyridine (20 mL) under nitrogen at 0 °C. Stirring was continued at 0 °C until TLC indicated disappearance of the starting material. The reaction mixture was quenched by the addition of methanol. The mixture was poured into

CH<sub>2</sub>Cl<sub>2</sub>, and washed with brine twice. The organic layers were dried over Na<sub>2</sub>SO<sub>4</sub> and filtered. The filtrate was concentrated in vacuo. Crystallization from petroleum ether/EtOAc afforded **S6** (3.6 g, 80%) as a white solid:  $[\alpha]_D^{24} = -23.6$  (*c* 2.8, CHCl<sub>3</sub>); <sup>1</sup>H NMR (400 MHz, CDCl<sub>3</sub>)  $\delta$  8.15–8.06 (m, 1H), 8.01 (d, *J* = 6.7 Hz, 2H), 7.63–7.21 (m, 17H), 7.08 (dd, *J* = 9.0, 3.6 Hz, 2H), 6.91–6.74 (m, 2H), 5.76 (s, 1H), 5.58 (s, 1H), 5.50 (s, 1H), 4.99 (dd, *J* = 11.7, 2.0 Hz, 1H), 4.80–4.66 (m, 1H), 4.31 (d, *J* = 12.7 Hz, 1H), 4.16 (s, 2H), 4.10 (d, *J* = 12.5 Hz, 1H), 3.97 (s, 1H), 3.75 (s, 3H); <sup>13</sup>C NMR (100 MHz, CDCl<sub>3</sub>)  $\delta$  165.8, 155.0, 150.7, 138.0, 137.91, 133.8, 133.3, 130.3, 130.3, 129.6, 129.0, 128.6, 128.4, 128.2, 128.0, 127.9, 126.5, 117.6, 114.8, 101.1, 97.2, 74.4, 73.6, 72.0, 69.9, 66.0, 60.6, 55.8; ESI-MS *m/z* calcd for C<sub>34</sub>H<sub>32</sub>O<sub>8</sub>Na [M+Na]<sup>+</sup> 591.1989, found 591.1985.

**2-*O*-Benzoyl-3-*O*-benzyl-4,6-*O*-benzylidene- $\alpha$ -L-iduopyranosyl trichloroacetimidate (**23**)**

Compound **S6** (1.0 g, 1.8 mmol) was dissolved in a mixed solvent of acetonitrile, toluene, and water (14 mL, v/v/v = 1:1.5:1). Cerous ammonium nitrate (3.0 g, 5.4 mmol) was added at room temperature. Stirring was continued until TLC indicated disappearance of the raw material. The solvent was removed in vacuo and the residue was dissolved in CH<sub>2</sub>Cl<sub>2</sub>, and washed with water, saturated sodium bicarbonate, and brine. The organic layers were dried over Na<sub>2</sub>SO<sub>4</sub> and filtered. The filtrate was concentrated in vacuo. The residue was purified by silica gel column chromatography (petroleum ether/EtOAc = 3:1) to give the hemiacetal (0.7 g, 85%) as a light red solid.

The hemiacetal (0.42 g, 0.9 mmol) was dissolved in CH<sub>2</sub>Cl<sub>2</sub> (5 mL) and cooled to 0 °C. Trichloroacetonitrile (0.45 mL, 4.5 mmol) and DBU (cat.) was added successively. After stirring at this temperature for about 2 h, the reaction mixture was concentrated in vacuo. The residue was chromatographed over silica gel (petroleum ether/EtOAc = 5:1, containing 1% Et<sub>3</sub>N) to yield **23** (0.52 g, 93%) as a colorless oil: <sup>1</sup>H NMR (400 MHz, CDCl<sub>3</sub>)  $\delta$  8.67 (s, 1 H), 8.13–7.90 (m, 2 H), 7.62–7.09 (m, 14 H), 6.53 (s, 1 H), 5.58 (s, 1 H), 5.49 (s, 1 H), 4.92 (d, *J* = 11.6 Hz, 1 H), 4.70 (d, *J* = 11.6 Hz, 1 H), 4.40 (d, *J* = 12.6 Hz, 1 H), 4.24 (s, 1 H), 4.20–4.05 (m, 2 H), 3.94 (s, 1 H); <sup>13</sup>C NMR (100 MHz, CDCl<sub>3</sub>)  $\delta$  165.7, 160.7, 138.0, 137.5, 133.4, 130.3, 129.5, 129.1, 128.5, 128.4, 128.2, 128.0, 128.0, 126.6, 101.3, 95.9, 91.3, 73.3, 72.9, 72.2, 69.6, 64.4, 61.9.

**2-Azido-6-*O*-benzoyl-3,4-di-*O*-benzyl-2-deoxy- $\alpha/\beta$ -D-glucopyranosyl *N*-phenyltrifluoroacetimidate (**24**)**

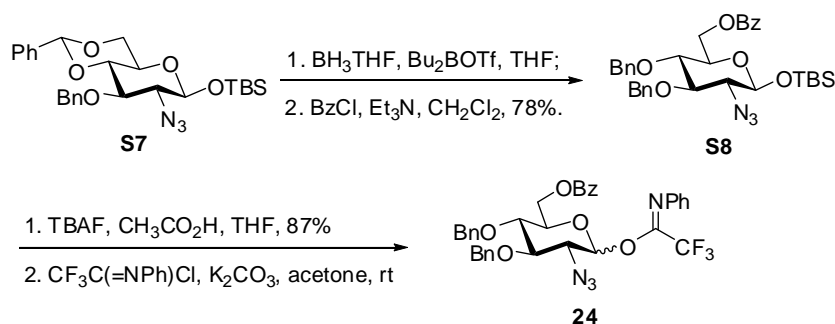

### ***tert*-Butyldimethylsilyl**

#### **2-azido-3,4-*O*-benzyl-2-deoxy-6-*O*-benzoyl- $\beta$ -D-glucopyranoside (S8)**

*tert*-Butyldimethylsilyl 2-azido-3-*O*-benzyl-4,6-*O*-benzylidene-2-deoxy- $\beta$ -D-glucopyranoside (**S7**)<sup>S1</sup> (1.0 g, 2.0 mmol) was dissolved in  $\text{BH}_3\cdot\text{THF}$  (1 M, 20 mL, 20 mmol) under nitrogen and cooled to 0 °C. After 15 min,  $\text{Bu}_2\text{B}\cdot\text{OTf}$  (1 M, 2 mL, 2 mmol) was added dropwise and stirring was continued at 0 °C for 2 h. The reaction mixture was quenched by the addition of  $\text{Et}_3\text{N}$  and the excess  $\text{BH}_3\cdot\text{THF}$  was consumed by slowly adding methanol. The solvent was removed in vacuo, co-evaporated with methanol twice.

Benzoyl chloride (0.4 mL, 3.4 mmol) was added to a solution of the above product in  $\text{CH}_2\text{Cl}_2$  (10 mL) and triethylamine (1.0 mL, 6.8 mmol) under nitrogen at 0 °C. Stirring was continued at 0 °C until TLC indicated disappearance of the starting material. The reaction mixture was quenched by the addition of methanol. The mixture was poured into  $\text{CH}_2\text{Cl}_2$ , and washed with brine twice. The organic layers were dried over  $\text{Na}_2\text{SO}_4$  and filtered. The filtrate was concentrated in vacuo. The filtrate was concentrated in vacuo. The residue was purified by silica gel column chromatography (petroleum ether/EtOAc = 25:1) to give **S8** (0.95 g, 78%) as a colorless oil:  $[\alpha]_{\text{D}}^{24} = 11.8$  ( $c$  1.0,  $\text{CHCl}_3$ );  $^1\text{H}$  NMR (300 MHz,  $\text{CDCl}_3$ )  $\delta$  8.01 (d,  $J = 6.8$  Hz, 2 H), 7.56 (t,  $J = 7.2$  Hz, 1H), 7.45–7.25 (m, 12 H), 4.94–4.79 (m, 3 H), 4.63–4.56 (m, 3 H), 4.37 (dd,  $J = 11.6$ , 5.6 Hz, 1 H), 3.65–3.54 (m, 2 H), 3.47–3.35 (m, 2 H), 0.89 (s, 9 H), 0.12 (s, 3 H), 0.10 (s, 3 H);  $^{13}\text{C}$  NMR (100 MHz,  $\text{CDCl}_3$ )  $\delta$  166.18, 137.89, 137.50, 133.13, 129.86, 129.73, 128.57, 128.37, 128.16, 128.10, 128.01, 97.21, 83.00, 77.72, 75.65, 75.15, 73.35, 68.76, 63.55, 29.73, 25.58, 17.97, -4.30, -5.20; ESI-MS  $m/z$  calcd for  $\text{C}_{33}\text{H}_{41}\text{N}_3\text{O}_6\text{SiNa}$   $[\text{M}+\text{Na}]^+$  626.2657, found 626.2648.

#### **2-Azido-6-*O*-benzoyl-3,4-di-*O*-benzyl-2-deoxy- $\alpha/\beta$ -D-glucopyranosyl *N*-phenyltrifluoroacetimidate (24)**

Compound **S8** (0.95 g, 1.57 mmol) was dissolved in THF (10 mL) followed by the addition of AcOH (0.27 mL, 4.7 mmol) and TBAF in THF (1 M, 2.35 mL, 2.35 mmol). Stirring was continued until TLC indicated disappearance of the starting material (about 3 h). The reaction mixture was diluted with  $\text{CH}_2\text{Cl}_2$  and washed with saturated aqueous sodium bicarbonate and brine. The organic phase was dried with  $\text{Na}_2\text{SO}_4$  and filtered, and the filtrate was concentrated in vacuo. The residue was chromatographed over silica gel (petroleum ether/EtOAc = 4:1) to give the hemiacetal (0.67 g, 87%) as

a colorless oil: ESI-MS ( $m/z$ ) 512.5  $[M+Na]^+$ .

The above hemiacetal (115 mg, 0.24 mmol) was dissolved in acetone (2 mL). *N*-Phenyl-trifluoroacetimidoyl chloride (40  $\mu$ L, 0.36 mmol) and  $K_2CO_3$  (85 mg, 0.6 mmol) was added successively. Stirring was continued until TLC indicated disappearance of the starting material (about 2 h). The mixture was concentrated. The residue was purified by silica gel column chromatography (petroleum ether/EtOAc = 4:1, containing 1%  $Et_3N$ ) to give **24** (160 mg, 99%) as a white solid:  $^1H$  NMR (400 MHz,  $CDCl_3$ )  $\delta$  8.01 (dd,  $J$  = 7.0, 5.2 Hz, 4 H), 7.58 (dd,  $J$  = 16.3, 7.7 Hz, 3 H), 7.50–7.29 (m, 22 H), 7.11 (m, 2 H), 6.78 (t,  $J$  = 7.2 Hz, 4 H), 5.05–4.82 (m, 6 H), 4.74–4.47 (m, 5 H), 4.45–4.35 (m, 1 H), 4.11 (m, 1 H), 3.85–3.64 (m, 5 H), 3.58 (brs, 1 H); ESI-MS  $m/z$  683.6  $[M+Na]^+$ , 699.7  $[M+K]^+$ .

#### **tert-Butyldimethylsilyl**

#### **(2-*O*-benzoyl-3-*O*-benzyl-4,6-*O*-benzylidene- $\beta$ -D-glucopyranosyl)**

#### **-(1 $\rightarrow$ 4)-2-azido-6-*O*-benzoyl-3-*O*-benzyl-2-deoxy- $\beta$ -D-glucopyranoside (**29**)**

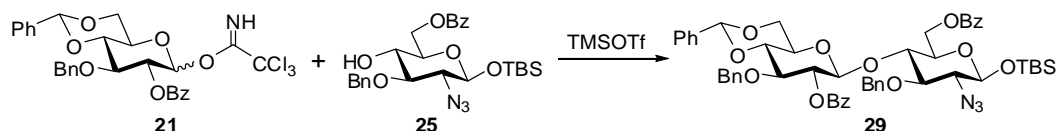

Trichloroacetimidate **21** (2.4g, 4.0 mmol) and acceptor **25**<sup>S1</sup> (2.0 g, 3.8 mmol) were dissolved in  $CH_2Cl_2$  (50 mL) under nitrogen. Powdered freshly activated 4 Å molecular sieves (4.0 g) were added, and the mixture was stirred for 1 hour at ambient temperature and then cooled to  $-30\text{ }^\circ\text{C}$ . TMSOTf (39  $\mu$ L, 0.2 mmol) was added to the mixture, and stirring was continued until TLC indicated disappearance of the imidate (about 30 min). The reaction mixture was quenched by the addition of  $Et_3N$ . The mixture was filtered, the filtrate was concentrated in vacuo. The residue was purified by silica gel column chromatography (petroleum ether/EtOAc/ $CH_2Cl_2$  = 10:1:1) to give disaccharide **29** (3.6 g, 95%) as a white solid:  $[\alpha]_D^{27}$  = 41.3 ( $c$  1.7,  $CHCl_3$ );  $^1H$  NMR (400 MHz,  $CDCl_3$ )  $\delta$  8.00 (d,  $J$  = 7.2 Hz, 2 H), 7.86 (d,  $J$  = 7.6 Hz, 2 H), 7.56 (t,  $J$  = 7.6 Hz, 1 H), 7.50–7.04 (m, 20 H), 5.54 (s, 1 H), 5.34 (t,  $J$  = 8.4 Hz, 1 H), 4.95 (d,  $J$  = 10.4 Hz, 1 H), 4.83–4.79 (m, 2 H), 4.73 (d,  $J$  = 8.0 Hz, 1 H), 4.65 (d,  $J$  = 12.0 Hz, 1 H), 4.47 (d,  $J$  = 7.2 Hz, 1 H), 4.42–4.36 (m, 2 H), 4.18–4.14 (dd,  $J$  = 4.8, 10.4 Hz, 1 H), 3.86–3.79 (m, 3 H), 3.52 (t,  $J$  = 10.4 Hz, 1 H), 3.47–3.29 (m, 4 H), 0.84 (s, 9 H), 0.06 (s, 3 H), 0.03 (s, 3 H);  $^{13}C$  NMR (100 MHz,  $CDCl_3$ )  $\delta$  166.0, 165.1, 138.5, 137.8, 137.2, 133.4, 133.3, 130.0, 129.7, 129.2, 128.6, 128.5, 128.4, 128.3, 128.1, 127.9, 127.7, 126.2, 101.8, 101.4, 97.0, 81.8, 80.9, 78.1, 75.7, 74.3, 73.9, 73.2, 68.6, 68.4, 66.5, 62.9, 25.7, 18.1, -4.3, -5.1; ESI-MS  $m/z$  calcd for  $C_{53}H_{59}N_3O_{12}SiNa$   $[M+Na]^+$  980.3767, found 980.3760.

#### **tert-Butyldimethylsilyl**

#### **(2-*O*-benzoyl-3-*O*-benzyl-4,6-*O*-benzylidene- $\beta$ -D-glucopyranosyl)-(1 $\rightarrow$ 4)-2-azido-3-*O*-benzyl-2-deoxy-6-*O*-(4-methoxybenzyl)- $\beta$ -D-glucopyranoside (**30**)**

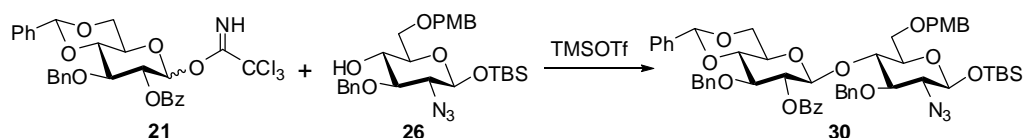

Trichloroacetimidate **21** (1.2 g, 2.0 mmol) and acceptor **26**<sup>S2</sup> (1.0 g, 1.9 mmol) were dissolved in CH<sub>2</sub>Cl<sub>2</sub> (20 mL) under nitrogen. Powdered freshly activated 4 Å molecular sieves (2.0 g) were added, and the mixture was stirred for 1 hour at ambient temperature and then cooled to -30 °C. TMSOTf (20 µL, 0.1 mmol) was added to the mixture, and stirring was continued until TLC indicated disappearance of imidate (about 30 min). The reaction mixture was quenched by the addition of Et<sub>3</sub>N. The mixture was filtered, the filtrate was concentrated in vacuo. The residue was purified by silica gel column chromatography (petroleum ether/EtOAc/CH<sub>2</sub>Cl<sub>2</sub> = 10:1:1) to give disaccharide **30** (1.8 g, 91%) as a white solid:  $[\alpha]_D^{24} = 12.0$  (*c* 1.0, CHCl<sub>3</sub>); <sup>1</sup>H NMR (300 MHz, CDCl<sub>3</sub>)  $\delta$  7.97 (d, *J* = 7.5 Hz, 2 H), 7.64–7.07 (m, 20 H), 6.89 (d, *J* = 8.1 Hz, 2 H), 5.53 (s, 1 H), 5.23 (t, *J* = 8.7 Hz, 1 H), 4.92 (d, *J* = 7.5 Hz, 1 H), 4.83–4.56 (m, 5 H), 4.38–4.35 (m, 1 H), 4.24–3.94 (m, 3 H), 3.74–3.09 (m, 9 H), 3.73 (s, 3 H), 0.89 (s, 9 H), 0.09, 0.08 (s, each 3 H); <sup>13</sup>C NMR (100 MHz, CDCl<sub>3</sub>)  $\delta$  165.05, 159.6, 138.8, 138.1, 137.5, 133.6, 130.3, 130.1, 129.8, 129.3, 128.7, 128.49, 128.47, 128.4, 128.1, 128.0, 127.80, 127.77, 126.3, 114.1, 101.4, 101.0, 97.2, 82.0, 81.0, 78.6, 75.4, 74.9, 74.4, 74.1, 73.3, 68.8, 68.5, 67.5, 66.3, 55.5, 25.8, 18.2, -4.3, -5.1; ESI-MS *m/z* calcd for C<sub>54</sub>H<sub>63</sub>N<sub>3</sub>O<sub>12</sub>SiNa[M+Na]<sup>+</sup> 996.4073, found 996.4081.

#### *tert*-Butyldimethylsilyl (methyl

#### 2-*O*-benzoyl-3,4-di-*O*-benzyl- $\beta$ -D-glucopyranosyluronate)-(1→4)-2-azido-6-*O*-benzoyl-3-*O*-benzyl-2-deoxy- $\beta$ -D-glucopyranoside (**31**)

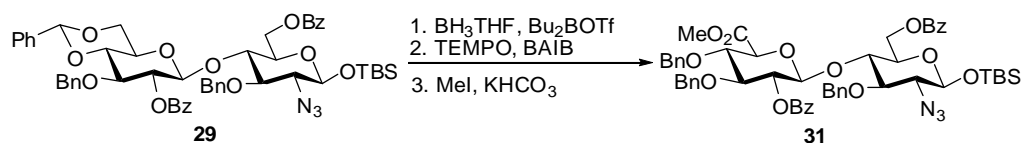

Disaccharide **29** (3.6 g, 3.8 mmol) was dissolved in BH<sub>3</sub>·THF (1M, 38 mL, 38 mmol) under nitrogen and cooled to 0 °C. After 15 min, Bu<sub>2</sub>B·OTf (1 M, 7.6 mL, 7.6 mmol) was added dropwise and stirring was continued at 0 °C for 2 h. The reaction mixture was quenched by the addition of Et<sub>3</sub>N and the excess BH<sub>3</sub>·THF was consumed by slowly adding methanol. The solvent was co-evaporated with methanol twice. The residue was purified by silica gel column chromatography (petroleum ether/EtOAc = 6:1) to give the corresponding 6'-ol (**31**) (3.4 g, 95%) as a white solid: <sup>1</sup>H NMR (400 MHz, CDCl<sub>3</sub>)  $\delta$  8.02 (d, *J* = 7.2 Hz, 2 H), 7.92 (d, *J* = 7.2 Hz, 2 H), 7.58 (t, *J* = 11.6 Hz, 1 H), 7.45–7.10 (m, 20 H), 5.32–5.27 (dd, *J* = 8.0, 9.2 Hz, 1 H), 4.96 (d, *J* = 11.2 Hz, 1 H), 4.84–4.78 (m, 2 H), 4.72 (d, *J* = 11.6 Hz, 1 H), 4.63–4.59 (m, 3 H), 4.48–4.34 (m, 3 H), 3.81–3.23 (m, 9 H), 0.85 (s, 9 H), 0.06 (s, 3 H), 0.04 (s, 3 H);

ESI-MS  $m/z$  calcd for  $C_{53}H_{61}N_3O_{13}SiNa$   $[M+Na]^+$  982.3917, found 982.3942.

To a vigorously stirring solution of the above product (3.4 g, 3.4 mmol) in a mixture of  $CH_2Cl_2/H_2O$  (60 mL, v/v = 2/1), were added TEMPO (53 mg, 0.34 mmol) and BAIB (4.4 g, 13.6 mmol). Stirring was continued until TLC indicated complete conversion of the starting material (about 3 h). The reaction mixture was quenched by the addition of aqueous  $Na_2SO_3$  (60 mL). The mixture was acidized with 5% HCl, then extracted with  $CH_2Cl_2$  three times. The combined organic layers were washed with brine (50 mL), and then dried over  $Na_2SO_4$  and filtered. The filtrate was concentrated in vacuo. The residue was co-evaporated with toluene twice.

The resulting oily residue was dissolved in DMF (60 mL) at 0 °C, then  $K_2CO_3$  (1.4 g, 13.6) and an excess of methyl iodide (1.7 mL, 27.3 mmol) were added. Stirring was continued until TLC indicated disappearance of the starting material (about 3 h). The excess methyl iodide was quenched by the addition of AcOH. The mixture was concentrated in vacuo. The oily residue was diluted with  $CH_2Cl_2$  and washed with saturated sodium bicarbonate and brine. The organic layers were dried over  $Na_2SO_4$  and filtered. The filtrate was concentrated in vacuo. The residue was purified by silica gel column chromatography (petroleum ether/EtOAc = 3:1) to yield **31** (2.8 g, 81% for 2 steps) as a white solid:  $[\alpha]_D^{24} = +30.5$  ( $c$  1.0,  $CHCl_3$ );  $^1H$  NMR (400 MHz,  $CDCl_3$ )  $\delta$  7.99 (d,  $J$  = 7.6 Hz, 2 H), 7.90 (d,  $J$  = 7.6 Hz, 2 H), 7.57 (t,  $J$  = 7.6 Hz, 1 H), 7.44–7.09 (m, 15 H), 5.35 (t,  $J$  = 8.4 Hz, 1 H), 5.04 (d,  $J$  = 10.8 Hz, 1 H), 4.80–4.70 (m, 4 H), 4.62 (d,  $J$  = 5.6 Hz, 1 H), 4.60 (d,  $J$  = 5.6 Hz, 1 H), 4.47–4.43 (m, 2 H), 4.36–4.32 (dd,  $J$  = 5.6, 12.0 Hz, 1 H), 4.00 (t,  $J$  = 9.2 Hz, 1 H), 3.90 (d,  $J$  = 9.6 Hz, 1 H), 3.83–3.56 (m, 2 H), 3.45 (s, 3 H), 3.45–3.27 (m, 3 H), 0.83 (s, 9 H), 0.47 (s, 3 H), 0.18 (s, 3 H);  $^{13}C$  NMR (100 MHz,  $CDCl_3$ )  $\delta$  168.2, 165.9, 165.0, 138.5, 137.6, 137.5, 137.4, 133.2, 129.8, 129.7, 129.6, 129.1, 128.6, 128.4, 128.3, 128.3, 128.0, 127.99, 127.96, 127.8, 127.6, 101.4, 96.9, 81.7, 80.8, 79.4, 78.1, 77.4, 77.1, 76.7, 75.4, 75.2, 75.1, 74.7, 73.7, 73.0, 68.4, 62.8, 52.5, 25.5, 17.9, -4.4, -5.2; ESI-MS  $m/z$  calcd for  $C_{54}H_{61}N_3O_{13}SiNa$   $[M+Na]^+$  1010.3866, found 1010.3897.

#### ***tert*-Butyldimethylsilyl (methyl**

#### ***2-O*-benzoyl-3,4-*O*-dibenzyl- $\beta$ -D-glucopyranosyluronate)-(1 $\rightarrow$ 4)-2-azido-3-*O*-benzyl-2-deoxy-6-*O*-(4-methoxybenzyl)- $\beta$ -D-glucopyranoside (**32**)**

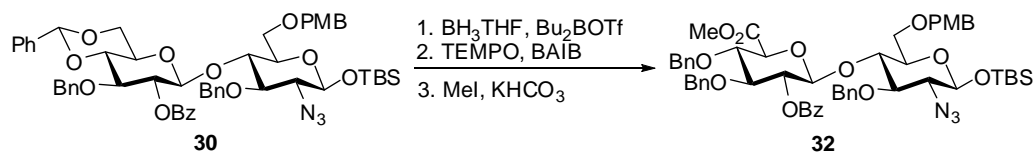

Disaccharide **30** (1.0 g, 1.0 mmol) was dissolved in  $BH_3\cdot THF$  (1 M, 10 mL, 10 mmol) under nitrogen and cooled to 0 °C. After 15 min,  $Bu_2B\cdot OTf$  (1 M, 2.1 mL, 2.1 mmol) was added dropwise and stirring was continued at 0 °C for 2 h. The reaction mixture was quenched by the addition of  $Et_3N$  and the excess  $BH_3\cdot THF$  was consumed by slowly adding methanol. The solvent was removed in vacuo, and the residue was co-evaporated with methanol twice. The residue was purified by silica gel column

chromatography (petroleum ether/EtOAc = 6:1) to give the 6'-ol (1.0 g, 99%) as a white solid:  $^1\text{H}$  NMR (400 MHz,  $\text{CDCl}_3$ )  $\delta$  7.94 (d,  $J$  = 8.0 Hz, 2 H), 7.60 (t,  $J$  = 7.2 Hz, 1 H), 7.47–7.11 (m, 19 H), 5.19 (t,  $J$  = 8.8 Hz, 1 H), 4.94 (d,  $J$  = 10.8 Hz, 1 H), 4.80–4.56 (m, 7 H), 4.40–4.37 (m, 2 H), 4.28 (d,  $J$  = 11.6 Hz, 1 H), 3.96–3.91 (m, 1 H), 3.74 (s, 3 H), 3.67–3.25 (m, 9 H), 3.11 (d,  $J$  = 9.2 Hz, 1 H), 0.89 (s, 9 H), 0.11 (s, 3 H), 0.09 (s, 3 H); ESI-MS  $m/z$  calcd for  $\text{C}_{54}\text{H}_{65}\text{N}_3\text{O}_{12}\text{SiNa}$   $[\text{M}+\text{Na}]^+$  998.4230, found 998.4235.

To a vigorously stirring solution of the above product (0.93 g, 0.96 mmol) in a mixture of  $\text{CH}_2\text{Cl}_2/\text{H}_2\text{O}$  (24 mL, v/v = 2/1), were added TEMPO (15 mg, 0.1 mmol) and BAIB (1.2 g, 3.8 mmol). Stirring was continued until TLC indicated complete conversion of the starting material (about 3 h). The reaction was quenched by the addition of aqueous  $\text{Na}_2\text{SO}_3$  (20 mL). The mixture was acidized with 5% HCl, then extracted with  $\text{CH}_2\text{Cl}_2$  three times. The combined organic layers were washed with brine (25 mL), dried over  $\text{Na}_2\text{SO}_4$ , and filtered. The filtrate was concentrated in vacuo, the residue was co-evaporated with toluene twice.

The above oily residue was dissolved in DMF (10 mL) at 0 °C, then  $\text{K}_2\text{CO}_3$  (0.4 g, 3.8) and an excess of methyl iodide (0.5 mL, 7.7 mmol) were added. Stirring was continued until TLC indicated disappearance of the starting material (about 3 h). The excess methyl iodide was quenched by the addition of AcOH. The mixture was concentrated in vacuo, the oily residue was diluted by  $\text{CH}_2\text{Cl}_2$  and washed with saturated sodium bicarbonate and brine. The organic layers were dried over  $\text{Na}_2\text{SO}_4$  and filtered. The filtrate was concentrated in vacuo. The residue was purified by silica gel column chromatography (petroleum ether/EtOAc = 3:1) to yield **32** (0.75 g, 75% for 2 steps) as a white solid:  $[\alpha]_{\text{D}}^{24} = +1.8$  ( $c$  2.8,  $\text{CHCl}_3$ );  $^1\text{H}$  NMR (400 MHz,  $\text{CDCl}_3$ )  $\delta$  7.93 (d,  $J$  = 7.6 Hz, 2 H), 7.59 (t,  $J$  = 6.0 Hz, 1 H), 7.46–7.09 (m, 14 H), 6.93 (d,  $J$  = 8.8 Hz, 2 H), 5.24 (t,  $J$  = 8.4 Hz, 1 H), 5.00 (d,  $J$  = 10.4 Hz, 1 H), 4.76–4.54 (m, 7 H), 4.36 (d,  $J$  = 7.2 Hz, 1 H), 4.22 (d,  $J$  = 12.0 Hz, 1 H), 3.98–3.93 (m, 2 H), 3.84 (d,  $J$  = 9.2 Hz, 1 H), 3.73 (s, 3 H), 3.62–3.53 (m, 2 H), 3.59 (s, 3 H), 3.37 (d,  $J$  = 9.2 Hz, 1 H), 3.27–3.25 (m, 2 H), 3.08 (d,  $J$  = 10.0 Hz, 2 H), 0.88 (s, 9 H), 0.09 (s, 3 H), 0.07 (s, 3 H);  $^{13}\text{C}$  NMR (100 MHz,  $\text{CDCl}_3$ )  $\delta$  168.4, 164.8, 159.4, 138.6, 137.8, 137.7, 133.4, 130.1, 129.8, 129.7, 129.6, 128.5, 128.4, 128.3, 128, 2, 128.2, 128.1, 127.9, 127.8, 127.7, 127.4, 114.0, 100.5, 97.0, 82.1, 80.7, 79.6, 77.4, 77.2, 77.0, 76.7, 76.5, 75.2, 75.1, 74.5, 73.7, 73.2, 68.3, 67.2, 55.2, 52.4, 25.6, 18.0, -4.3, -5.2; ESI-MS  $m/z$  calcd for  $\text{C}_{55}\text{H}_{65}\text{N}_3\text{O}_{13}\text{SiNa}$   $[\text{M}+\text{Na}]^+$  1026.4179, found 1026.4218.

## Disaccharide donors 33-35

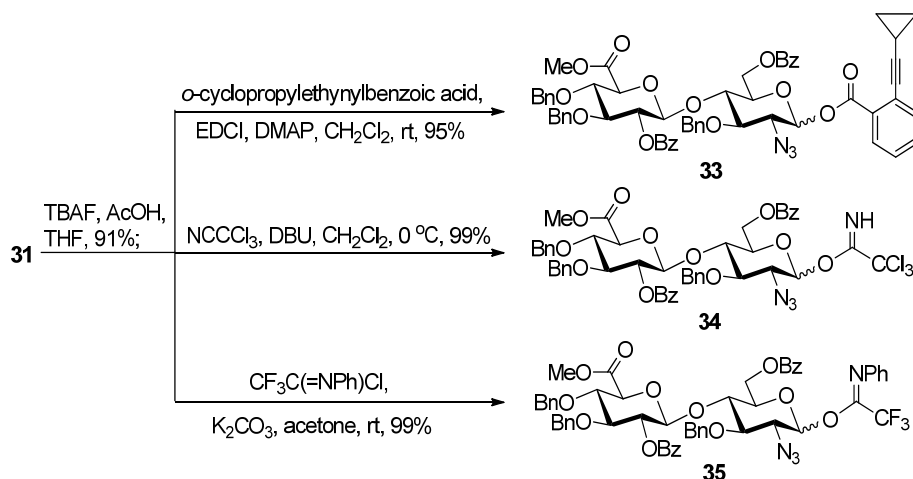

### (Methyl

### **2-*O*-benzoyl-3,4-di-*O*-benzyl- $\beta$ -D-glucopyranosyluronate)-(1 $\rightarrow$ 4)-2-azido-6-*O*-benzoyl-3-*O*-benzyl-2-deoxy- $\alpha/\beta$ -D-glucopyranosyl 2-(cyclopropylethynyl)-benzoate (33)**

Disaccharide **31** (2.9 g, 2.9 mmol) was dissolved in THF (25 mL) followed by the addition of AcOH (0.5 mL, 8.7 mmol) and TBAF in THF (1 M, 5.8 mL, 5.8 mmol). Stirring was continued until TLC indicated disappearance of the starting material (about 3 h). The reaction mixture was diluted with CH<sub>2</sub>Cl<sub>2</sub> (50 mL) and washed with saturated aqueous sodium bicarbonate (50 mL) and brine (50 mL). The organic phase was dried with Na<sub>2</sub>SO<sub>4</sub> and filtered. The filtrate was concentrated in vacuo. The residue was chromatographed over silica gel (petroleum ether ether/EtOAc = 3:1) to give the hemiacetal (2.3 g, 91%) as a white solid: ESI-MS (*m/z*) 891.8 [M+NH<sub>4</sub>]<sup>+</sup>, 896.7 [M+Na]<sup>+</sup>.

A solution of the above hemiacetal (282 mg, 0.32 mmol), *ortho*-alkynylbenzoate (72 mg, 0.35 mmol), 4-dimethylaminopyridine (DMAP) (4 mg, 0.03 mmol), and 1-(3-Dimethylaminopropyl)-3-ethylcarbodiimide hydrochloride (EDCI) (124 mg, 0.65 mmol) in dry CH<sub>2</sub>Cl<sub>2</sub> was stirred at room temperature. Stirring was continued until TLC indicated disappearance of the starting material (about 5 h). The mixture was diluted with CH<sub>2</sub>Cl<sub>2</sub>, and washed with saturated Sodium bicarbonate and brine, respectively. The filtrates were concentrated. The residue was purified by silica gel column chromatography (petroleum ether/EtOAc = 4:1) to give **33** (319 mg, 95%) as a white foam: <sup>1</sup>H NMR (400 MHz, CDCl<sub>3</sub>)  $\delta$  8.12–7.82 (m, 5H), 7.68–6.98 (m, 25H), 6.44 (d, *J* = 3.8 Hz, 1H), 5.61 (d, *J* = 8.4 Hz, 1H), 5.44–5.32 (m, 1H), 5.24 (d, *J* = 10.5 Hz, 1H), 5.15 (d, *J* = 10.6 Hz, 1H), 4.85–4.37 (m, 8H), 4.18–3.94 (m, 2H), 3.89–3.47 (m, 8H), 1.51–1.38 (m, 1H), 0.81 (d, *J* = 6.6 Hz, 4H); ESI-MS *m/z* calcd for C<sub>60</sub>H<sub>55</sub>N<sub>3</sub>O<sub>14</sub>Na [M+Na]<sup>+</sup> 1064.3576, found 1064.3570.

### (Methyl

### **2-*O*-benzoyl-3,4-di-*O*-benzyl- $\beta$ -D-glucopyranosyluronate)-(1 $\rightarrow$ 4)-2-azido-6-*O*-benzoyl-3-*O*-benzyl-2-deoxy- $\alpha/\beta$ -D-glucopyranosyl trichloroacetimidate (34)**

The hemiacetal (100 mg, 0.11 mmol) was dissolved in dry CH<sub>2</sub>Cl<sub>2</sub> (2 mL) and cooled to 0 °C. Trichloroacetonitrile (60 µL, 0.6 mmol) and DBU (cat.) were added successively. Stirring was continued until TLC indicated disappearance of the starting material (about 2 h). The mixture was concentrated. The residue was purified by silica gel column chromatography (petroleum ether/EtOAc = 5:1, containing 1% Et<sub>3</sub>N) to give **34** (115 mg, 99%) as a white solid: <sup>1</sup>H NMR (400 MHz, CDCl<sub>3</sub>) δ 8.64 (s, 1H), 7.95 (dd, *J* = 24.1, 7.3 Hz, 4H), 7.59 (t, *J* = 7.4 Hz, 1H), 7.52–6.96 (m, 22H), 6.28 (d, *J* = 3.5 Hz, 1H), 5.45–5.33 (m, 1H), 5.21 (d, *J* = 10.5 Hz, 1H), 4.86–4.54 (m, 6H), 4.52–4.30 (m, 2H), 4.15–3.93 (m, 3H), 3.93–3.74 (m, 3H), 3.63 (dd, *J* = 10.1, 3.6 Hz, 1H), 3.55 (s, 3H); <sup>13</sup>C NMR (100 MHz, CDCl<sub>3</sub>) δ 168.22, 165.96, 165.05, 160.62, 137.93, 137.58, 137.53, 133.61, 133.55, 129.78, 129.75, 129.49, 129.13, 128.75, 128.66, 128.58, 128.50, 128.45, 128.15, 128.05, 127.92, 127.87, 101.35, 94.26, 90.81, 81.70, 79.47, 78.04, 77.31, 75.93, 75.32, 75.26, 74.99, 73.78, 71.55, 62.41, 62.10, 52.64; ESI-MS *m/z* 1039.7 [M+Na]<sup>+</sup>.

#### (Methyl

#### **2-*O*-benzoyl-3,4-di-*O*-benzyl-β-D-glucopyranosyluronate)-(1→4)-2-azido-6-*O*-benzoyl-3-*O*-benzyl-2-deoxy-α/β-D-glucopyranosyl *N*-phenyltrifluoroacetimidate (**35**)**

The hemiacetal (240 mg, 0.27 mmol) was dissolved in acetone (3 mL). *N*-Phenyltrifluoroacetimidoyl chloride (45 µL, 0.41 mmol) and K<sub>2</sub>CO<sub>3</sub> (95 mg, 0.7 mmol) were added successively. Stirring was continued until TLC indicated disappearance of starting material (about 2 h). The mixture was concentrated. The residue was purified by silica gel column chromatography (petroleum ether/EtOAc = 4:1, containing 1% Et<sub>3</sub>N) to give **35** (284 mg, 99%) as a white solid: <sup>1</sup>H NMR (400 MHz, CDCl<sub>3</sub>) δ 7.95 (dd, *J* = 30.1, 7.7 Hz, 4H), 7.57 (t, *J* = 7.4 Hz, 1H), 7.51–6.91 (m, 22H), 6.70 (d, *J* = 7.4 Hz, 2H), 5.35 (t, *J* = 8.5 Hz, 1H), 5.11 (d, *J* = 10.8 Hz, 1H), 4.84–4.52 (m, 6H), 4.49–4.27 (m, 2H), 4.09–3.69 (m, 4H), 3.67–3.41 (m, 5H), 3.09 (q, *J* = 7.2 Hz, 1H); ESI-MS *m/z* 1067.9 [M+Na]<sup>+</sup>.

#### (Methyl

#### **2-*O*-benzoyl-3,4-di-*O*-benzyl-β-D-glucopyranosyluronate)-(1→4)-2-azido-6-*O*-(4-methoxybenzyl)-3-*O*-benzyl-2-deoxy-α/β-D-glucopyranosyl *N*-phenyltrifluoroacetimidate (**36**)**

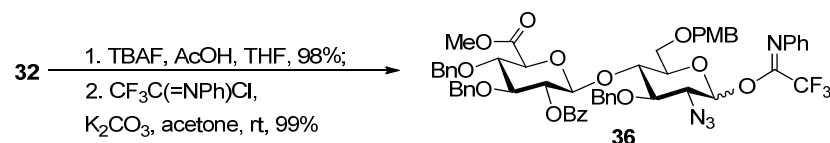

Disaccharide **32** (0.75 g, 0.75 mmol) was dissolved in THF (5 mL) followed by the addition of AcOH (0.13 mL, 2.24 mmol) and TBAF in THF (1 M, 1.5 mL, 1.5 mmol). Stirring was continued until TLC indicated disappearance of the starting material (about 3 h). The reaction mixture was diluted with CH<sub>2</sub>Cl<sub>2</sub> and washed with saturated aqueous sodium bicarbonate and brine. The organic phase was dried with Na<sub>2</sub>SO<sub>4</sub> and filtered. The filtrate was concentrated in vacuo. The residue was chromatographed over

silica gel (petroleum ether ether/EtOAc = 4:1) to give the hemiacetal (0.66 g, 98%) as a white solid: ESI-MS  $m/z$  907.8  $[M+NH_4]^+$ , 912.8  $[M+Na]^+$ .

The above hemiacetal (400 mg, 0.45 mmol) was dissolved in acetone (5 mL). *N*-Phenyltrifluoroacetimidoyl chloride (74  $\mu$ L, 0.67 mmol) and  $K_2CO_3$  (155 mg, 1.1 mmol) were added successively. Stirring was continued until TLC indicated disappearance of the starting material (about 2 h). The mixture was concentrated. The residue was purified by silica gel column chromatography (petroleum ether/EtOAc = 5:1, containing 1%  $Et_3N$ ) to give **36** (477 mg, 99%) as a white solid.

### Methyl

#### (2-*O*-benzoyl-3-*O*-benzyl-4,6-*O*-benzylidene- $\beta$ -D-glucopyranosyl)-(1 $\rightarrow$ 4)-2-azido-6-*O*-benzoyl-3-*O*-benzyl-2-deoxy- $\alpha$ -D-glucopyranoside (**37**)

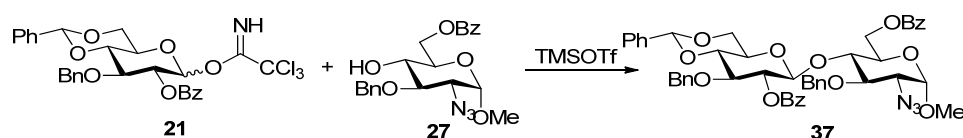

Trichloroacetimidate **21** (1.7 g, 2.87 mmol) and acceptor **27**<sup>S3</sup> (1.1 g, 2.61 mmol) were dissolved in  $CH_2Cl_2$  (20 mL) under nitrogen. Powdered freshly activated 4 Å molecular sieves (4.0 g) were added, and the mixture was stirred for 1 hour at ambient temperature and then cooled to  $-30\text{ }^\circ\text{C}$ . TMSOTf (39  $\mu$ L, 0.2 mmol) was added to the mixture, and stirring was continued until TLC indicated disappearance of the imidate (about 30 min). The reaction was quenched by the addition of  $Et_3N$ . The mixture was filtered, the filtrate was concentrated in vacuo. The residue was purified by silica gel column chromatography (petroleum ether/EtOAc/ $CH_2Cl_2$  = 10:1:1) to give disaccharide **37** (2.38 g, 97%) as a white solid:  $[\alpha]_D^{27} = 93.9$  ( $c$  0.9,  $CHCl_3$ );  $^1H$  NMR (400 MHz,  $CDCl_3$ )  $\delta$  8.05 (d,  $J = 7.2$  Hz, 2 H), 7.92 (d,  $J = 7.2$  Hz, 2 H), 7.59–7.32 (m, 16 H), 7.13–7.06 (m, 5 H), 5.52 (s, 1 H), 5.37 (t,  $J = 8.4$  Hz, 1 H), 5.05 (d,  $J = 10.4$  Hz, 1 H), 4.82–4.71 (m, 4 H), 4.64 (d,  $J = 11.6$  Hz, 1 H), 4.41 (s, 2 H), 4.14–4.10 (dd,  $J = 4.8, 10.8$  Hz, 1 H), 3.94–3.76 (m, 5 H), 3.46–3.30 (m, 3 H), 3.35 (s, 3 H);  $^{13}C$  NMR (100 MHz,  $CDCl_3$ )  $\delta$  166.1, 165.1, 138.4, 137.8, 137.2, 133.5, 133.5, 130.0, 129.9, 129.7, 129.6, 129.3, 129.2, 128.7, 128.6, 128.5, 128.4, 128.3, 128.1, 128.0, 127.9, 127.7, 126.1, 101.7, 101.4, 98.5, 81.8, 78.3, 78.2, 78.1, 75.6, 74.3, 73.91, 69.0, 68.5, 66.5, 63.2, 62.6, 55.6; ESI-MS  $m/z$  calcd for  $C_{48}H_{47}N_3O_{12}Na$   $[M+Na]^+$  880.3070, found 880.3052.

### *tert*-Butyldimethylsilyl

#### (2-*O*-benzoyl-3-*O*-benzyl-4,6-*O*-benzylidene- $\beta$ -D-glucopyranosyl)-(1 $\rightarrow$ 4)-2-azido-3-*O*-benzyl-2-deoxy-6-*O*-(4-methoxybenzyl)- $\beta$ -D-glucopyranoside (**38**)

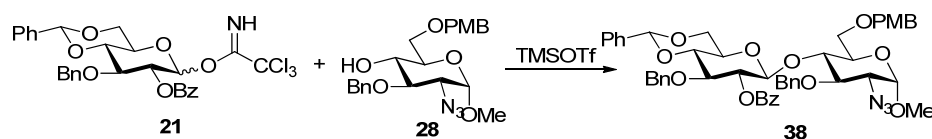

Trichloroacetimidate **21** (0.8 g, 1.33 mmol) and acceptor **28**<sup>S2</sup> (0.52 g, 1.21 mmol) were dissolved in CH<sub>2</sub>Cl<sub>2</sub> (10 mL) under nitrogen. Powdered freshly activated 4 Å molecular sieves (2.0 g) were added, and the mixture was stirred for 1 hour at ambient temperature and then cooled to -30 °C. TMSOTf (19 µL, 0.1 mmol) was added to the mixture, and stirring was continued until TLC indicated disappearance of the imidate (about 30 min). The reaction was quenched by the addition of Et<sub>3</sub>N. The mixture was filtered, the filtrate was concentrated in vacuo. The residue was purified by silica gel column chromatography (petroleum ether/EtOAc/CH<sub>2</sub>Cl<sub>2</sub> = 10:1:1) to give **38** (1.05 g, 90%) as a white solid:  $[\alpha]_D^{24} = 48.7$  (*c* 1.0, CHCl<sub>3</sub>); <sup>1</sup>H NMR (300 MHz, CDCl<sub>3</sub>)  $\delta$  7.96 (d, *J* = 7.5 Hz, 2 H), 7.64–7.09 (m, 20 H), 6.91 (d, *J* = 8.4 Hz, 2 H), 5.51 (s, 1 H), 5.21 (t, *J* = 8.4 Hz, 1 H), 5.01 (d, *J* = 10.5 Hz, 1 H), 4.83–4.59 (m, 5 H), 4.41 (d, *J* = 7.8 Hz, 1 H), 4.22–4.15 (m, 2 H), 3.99 (t, *J* = 9.3 Hz, 1 H), 3.82 (t, *J* = 9.6 Hz, 1 H), 3.69–3.15 (m, 8 H), 3.68 (s, 3 H), 3.29 (s, 3 H); <sup>13</sup>C NMR (100 MHz, CDCl<sub>3</sub>)  $\delta$  165.0, 159.9, 138.7, 137.5, 133.6, 130.3, 130.0, 129.8, 129.3, 128.7, 128.5, 128.45, 128.40, 128.2, 128.0, 127.8, 126.3, 114.3, 101.4, 100.8, 98.9, 81.9, 78.7, 78.3, 77.0, 75.4, 74.5, 74.0, 73.4, 70.3, 68.7, 67.0, 66.3, 63.1, 55.6, 55.5; ESI-MS *m/z* calcd for C<sub>49</sub>H<sub>51</sub>N<sub>3</sub>O<sub>12</sub>Na [M+Na]<sup>+</sup> 896.3365, found 896.3366.

## Methyl

**(2-*O*-levulinoyl-3-*O*-benzyl-4,6-*O*-benzylidene- $\beta$ -D-glucopyranosyl)-(1 $\rightarrow$ 4)-2-azido-6-*O*-benzoyl-3-*O*-benzyl-2-deoxy- $\alpha$ -D-glucopyranoside (**39**)**

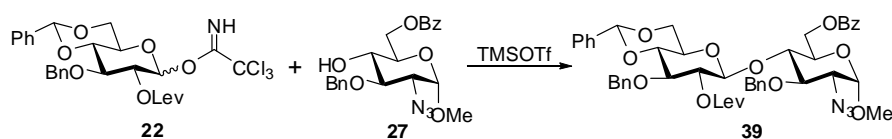

Trichloroacetimidate **22** (1.9 g, 3.7 mmol) and acceptor **27** (1.82 g, 4.4 mmol) were dissolved in CH<sub>2</sub>Cl<sub>2</sub> (30 mL) under nitrogen. Powdered freshly activated 4 Å molecular sieves (4.0 g) were added, and the mixture was stirred for 1 hour at ambient temperature and then cooled to -30 °C. TMSOTf (66 µL, 0.3 mmol) was added to the mixture, and stirring was continued until TLC indicated disappearance of the imidate (about 30 min). The reaction was quenched by the addition of Et<sub>3</sub>N. The mixture was filtered, and the filtrate was concentrated in vacuo. The residue was purified by silica gel column chromatography (petroleum ether/EtOAc = 4:1) to give **39** (2.7 g, 86%) as a white solid:  $[\alpha]_D^{23} = 64.1$  (*c* 2.3, CHCl<sub>3</sub>); <sup>1</sup>H NMR (400 MHz, CDCl<sub>3</sub>)  $\delta$  8.01 (d, *J* = 7.2 Hz, 2 H), 7.59 (t, *J* = 7.6 Hz, 1 H), 7.47–7.28 (m, 17 H), 5.47 (s, 1 H), 5.07 (t, *J* = 9.6 Hz, 1 H), 4.99 (d, *J* = 10.4 Hz, 1 H), 4.84 (d, *J* = 11.6 Hz, 1 H), 4.79–4.53 (m, 6 H), 4.13–4.08 (m, 2 H), 3.99–3.93 (m, 2 H), 3.71–3.65 (m, 2 H), 3.46–3.37 (m, 5 H), 3.26–3.20 (m, 1 H), 2.87–2.79 (m, 1 H), 2.69–2.57 (m, 2 H), 2.41–2.33 (m, 1 H), 2.14 (s, 3 H); <sup>13</sup>C NMR (100 MHz, CDCl<sub>3</sub>)  $\delta$  205.9, 171.5, 166.2, 138.3, 138.2, 137.1, 133.5, 129.8, 129.6, 129.1, 128.7, 128.4, 128.3, 128.0, 127.8, 127.7, 126.0, 101.4, 101.2, 98.4, 81.5, 78.9, 78.4, 78.0, 75.6, 74.5, 73.6, 68.8, 68.4, 66.3, 63.2, 62.9, 55.3, 37.7, 29.8, 27.8; ESI-MS *m/z* calcd for C<sub>46</sub>H<sub>49</sub>N<sub>3</sub>O<sub>13</sub>Na

$[M+Na]^+$  874.3158, found 874.3140.

### Methyl

#### (2,3-*O*-benzyl-4,6-*O*-benzylidene- $\beta$ -D-glucopyranosyl)-(1 $\rightarrow$ 4)-2-azido-6-*O*-benzoyl-3-*O*-benzyl-2-deoxy- $\alpha$ -D-glucopyranoside (**40**)

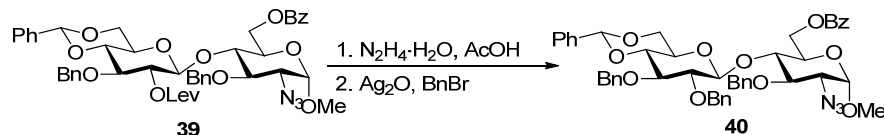

Disaccharide **39** (2.6 g, 3.0 mmol) was dissolved in  $CH_2Cl_2$  (20 mL), acetic acid (0.86 mL, 15.0 mmol) and hydrazine hydrate (0.72 mL, 15.0) were added. Stirring was continued until TLC indicated disappearance of the raw material. The reaction was quenched by the addition of acetone. The solvent was removed in vacuo, the residue was dissolved in  $CH_2Cl_2$  and washed with water and brine. The organic layers were dried over  $Na_2SO_4$  and filtered. The filtrate was concentrated in vacuo. The residue was purified by silica gel column chromatography (petroleum ether/EtOAc = 2:1) to give the 2'-ol (2.1 g, 93%) as a white solid:  $^1H$  NMR (400 MHz,  $CDCl_3$ )  $\delta$  8.03 (d,  $J$  = 7.2 Hz, 2 H), 7.59 (t,  $J$  = 7.6 Hz, 1 H), 7.48–7.28 (m, 17 H), 5.48 (s, 1 H), 5.01–4.94 (m, 2 H), 4.85–4.70 (m, 4 H), 4.63–4.57 (m, 2 H), 4.06–3.95 (m, 4 H), 3.64–3.57 (m, 3 H), 3.50–3.45 (m, 2 H), 3.42 (s, 3 H), 3.28–3.22 (m, 1 H); ESI-MS  $m/z$  776.3  $[M+Na]^+$ .

The above product (1.0 g, 1.3 mmol) was dissolved in DMF (6 mL). Benzyl bromide (0.32 mL, 2.64 mmol) was added and the mixture was stirred for 30 min. Silver(I)oxide (800 mg, 3.4 mmol) was added and the reaction vessel was covered in aluminum foil to exclude light. After 8 h, the reaction mixture was filtered through Celite. The filtrate was concentrated in vacuo. Flash chromatography on silica gel (petroleum ether/EtOAc = 4: 1) gave **40** (684 mg, 60%) as a white solid:  $[\alpha]_D^{23}$  = 54.3 ( $c$  1.0,  $CHCl_3$ );  $^1H$  NMR (400 MHz,  $CDCl_3$ )  $\delta$  7.97 (d,  $J$  = 7.6 Hz, 2 H), 7.57 (t,  $J$  = 7.6 Hz, 1 H), 7.46–7.24 (m, 22 H), 5.50 (s, 1 H), 5.00 (d,  $J$  = 10.4 Hz, 1 H), 4.92–4.73 (m, 6 H), 4.65 (dd,  $J$  = 12.4 Hz, 1.6 Hz, 1 H), 4.58 (d,  $J$  = 7.6 Hz, 1 H), 4.47 (dd,  $J$  = 12.0 Hz, 4.4 Hz, 1 H), 4.17 (dd,  $J$  = 10.4, 4.4 Hz, 1 H), 3.98 (t,  $J$  = 9.2 Hz, 1 H), 3.87 (t,  $J$  = 10.0 Hz, 1 H), 3.79–3.73 (m, 2 H), 3.64 (t,  $J$  = 8.8 Hz, 1 H), 3.51–3.44 (m, 6 H), 3.29–3.23 (m, 1 H);  $^{13}C$  NMR (100 MHz,  $CDCl_3$ )  $\delta$  165.8, 138.4, 138.1, 137.2, 133.3, 129.8, 129.5, 129.0, 128.5, 128.3, 128.2, 128.1, 128.0, 128.0, 127.8, 127.8, 127.7, 126.0, 103.2, 101.1, 98.2, 82.7, 81.6, 81.2, 78.4, 76.6, 76.0, 75.5, 75.2, 69.1, 68.6, 66.1, 62.9, 62.4, 55.4; ESI-MS  $m/z$  calcd for  $C_{48}H_{49}N_3O_{11}Na$   $[M+Na]^+$  866.3259, found 866.3244.

### Methyl (benzyl

#### 2-*O*-benzoyl-3-*O*-benzyl- $\beta$ -D-glucopyranosyluronate)-(1 $\rightarrow$ 4)-2-azido-6-*O*-benzoyl-3-*O*-benzyl-2-deoxy- $\alpha$ -D-glucopyranoside (**44**)

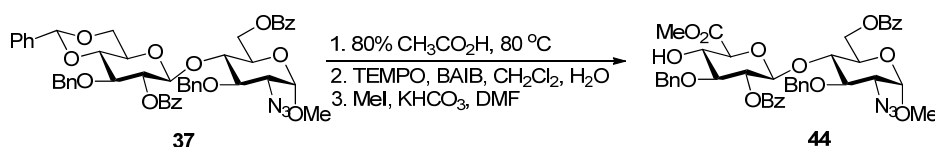

Disaccharide **37** (2.22 g, 2.58 mmol) was dissolved in  $\text{CH}_3\text{CO}_2\text{H}/\text{H}_2\text{O}$  (25 mL, v/v = 8:2). The mixture was heated at 80 °C until TLC indicated disappearance of the starting material. The mixture was concentrated in vacuo. The residue was purified by silica gel column chromatography (petroleum ether/EtOAc = 2:1) to give 4',6'-diol **41** (1.9 g, 96%) as a white solid:  $^1\text{H}$  NMR (400 MHz,  $\text{CDCl}_3$ )  $\delta$  8.10 (d,  $J$  = 6.8 Hz, 2 H), 7.95 (d,  $J$  = 6.8 Hz, 2 H), 7.59 (t,  $J$  = 7.2 Hz, 1 H), 7.49–7.15 (m, 15 H), 5.31 (t,  $J$  = 8.8 Hz, 1 H), 5.04 (d,  $J$  = 10.8 Hz, 1 H), 4.82 (d,  $J$  = 10.8 Hz, 1 H), 4.71–4.38 (m, 6 H), 3.94–3.61 (m, 6 H), 3.44–3.41 (dd,  $J$  = 3.6, 9.6 Hz, 1 H), 3.34 (s, 3 H), 3.34–3.16 (m, 2 H), 2.54–2.52 (m, 1 H), 1.87–1.83 (m, 2 H);  $^{13}\text{C}$  NMR (100 MHz,  $\text{CDCl}_3$ )  $\delta$  166.1, 165.0, 138.2, 137.7, 133.4, 129.8, 129.5, 129.2, 128.7, 128.6, 128.5, 128.0, 127.93, 127.90, 127.4, 101.0, 98.4, 82.7, 78.1, 77.7, 75.7, 75.3, 74.8, 73.9, 70.6, 68.9, 63.2, 62.6, 62.0, 55.4; ESI-MS  $m/z$  calcd for  $\text{C}_{41}\text{H}_{43}\text{N}_3\text{O}_{12}\text{Na}$   $[\text{M}+\text{Na}]^+$  792.2739, found 792.2745.

To a vigorously stirring solution of **41** in  $\text{CH}_2\text{Cl}_2/\text{H}_2\text{O}$  (24 mL, v/v = 2:1) were added TEMPO (7 mg, 0.04 mmol) and BAIB (1.6 g, 5.0 mmol). Stirring was continued until TLC indicated complete conversion of the starting material to a spot of lower  $R_f$  (about 3 h). The reaction was quenched by the addition of aqueous  $\text{Na}_2\text{SO}_3$  (20 mL). The mixture was acidized with 5% HCl, then extracted with  $\text{CH}_2\text{Cl}_2$  three times. The combined organic layers were washed with brine (25 mL), and then dried over  $\text{Na}_2\text{SO}_4$  and filtered. The filtrate was concentrated in vacuo, the residue was co-evaporated with toluene twice.

The above oily residue was dissolved in DMF (15 mL) at 0 °C, then  $\text{K}_2\text{CO}_3$  (0.8 g, 8.0 mmol) and an excess of methyl iodide (1.0 mL, 16.0 mmol) were added. Stirring was continued until TLC indicated disappearance of the starting material (about 3 h). The excess methyl iodide was quenched by the addition of AcOH. The mixture was concentrated in vacuo. The oily residue was diluted with  $\text{CH}_2\text{Cl}_2$  and washed with saturated sodium bicarbonate and brine. The organic layers were dried over  $\text{Na}_2\text{SO}_4$  and filtered. The filtrate was concentrated in vacuo. The residue was purified by silica gel column chromatography (petroleum ether/EtOAc = 3:1) to yield **44** (1.73 g, 84% for 2 steps) as a white solid:  $[\alpha]_{\text{D}}^{26} = 95.0$  ( $c$  0.7,  $\text{CHCl}_3$ );  $^1\text{H}$  NMR (400 MHz,  $\text{CDCl}_3$ )  $\delta$  8.04 (d,  $J$  = 6.8 Hz, 2 H), 7.93 (d,  $J$  = 6.8 Hz, 2 H), 7.59 (t,  $J$  = 7.6 Hz, 1 H), 7.46–7.27 (m, 10 H), 7.13 (s, 5 H), 5.35–5.33 (dd,  $J$  = 8.0, 9.2 Hz, 1 H), 5.15 (d,  $J$  = 10.8 Hz, 1 H), 4.78–4.67 (m, 5 H), 4.45–4.43 (m, 2 H), 4.03–3.93 (m, 3 H), 3.78–3.76 (m, 1 H), 3.72 (d,  $J$  = 9.6 Hz, 1 H), 3.65 (t,  $J$  = 9.2 Hz, 1 H), 3.57 (s, 3 H), 3.40–3.36 (m, 1 H), 3.33 (s, 3 H), 3.01 (d,  $J$  = 2.4 Hz, 1 H);  $^{13}\text{C}$  NMR (100 MHz,  $\text{CDCl}_3$ )  $\delta$  169.2, 166.0, 165.0, 138.4, 137.7, 133.4, 133.3, 129.8, 129.6, 129.1, 128.6, 128.5, 128.3, 128.0, 127.81, 127.76, 127.5, 101.3, 98.5, 81.0, 78.20, 78.16, 81.0, 75.3, 74.7, 74.4, 73.1, 72.2, 68.7, 63.1, 62.5, 55.4, 52.7; ESI-MS

$m/z$  calcd for  $C_{42}H_{43}N_3O_{13}Na$   $[M+Na]^+$  820.2688, found 820.2676.

### Methyl (methyl

### 2-*O*-benzoyl-3-*O*-benzyl- $\beta$ -D-glucopyranosyluronate)-(1 $\rightarrow$ 4)-2-azido-3-*O*-benzyl-2-deoxy-6-*O*-(4-methoxybenzyl)- $\alpha$ -D-glucopyranoside (**45**)

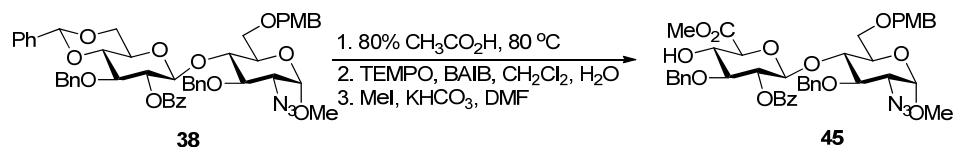

Disaccharide **38** (1.05 g, 1.2 mmol) was dissolved in  $CH_3CO_2H/H_2O$  (15 mL, v/v = 8:2). The mixture was heated at 80 °C until TLC indicated disappearance of the starting material. The mixture was concentrated in vacuo. The residue was purified by silica gel column chromatography (petroleum ether/EtOAc = 2:1) to give the 4'6'-diol **42** (0.95 g, 99%) as a white solid:  $^1H$  NMR (400 MHz,  $CDCl_3$ )  $\delta$  7.95 (d, 2 H,  $J$  = 8.8 Hz), 7.62 (t,  $J$  = 7.2 Hz, 1 H), 7.48 (t,  $J$  = 8.0 Hz, 1 H), 7.40–7.16 (m, 12 H), 6.99 (d,  $J$  = 8.4 Hz, 2 H), 5.17–5.13 (dd,  $J$  = 8.4, 9.6 Hz, 1 H), 4.99 (d,  $J$  = 10.8 Hz, 1 H), 4.78–4.72 (m, 3 H), 4.63–4.55 (dd,  $J$  = 11.2, 21.2 Hz, 2 H), 4.40 (d,  $J$  = 8.4 Hz, 1 H), 4.25 (d,  $J$  = 8.4 Hz, 1 H), 3.95 (t,  $J$  = 9.6 Hz, 1 H), 3.80 (s, 3 H), 3.84–3.17 (m, 10 H), 3.30 (s, 3 H), 2.37 (s, 1 H);  $^{13}C$  NMR (100 MHz,  $CDCl_3$ )  $\delta$  164.8, 159.6, 138.5, 138.0, 133.3, 130.2, 129.9, 129.7, 128.51, 128.47, 128.4, 127.9, 127.8, 127.7, 127.6, 127.4, 114.2, 100.1, 98.7, 83.1, 78.1, 77.7, 76.4, 75.3, 74.8, 74.0, 73.3, 70.9, 70.2, 66.9, 63.2, 63.1, 62.2, 55.4, 55.3; ESI-MS  $m/z$  calcd for  $C_{42}H_{47}N_3O_{12}Na$   $[M+Na]^+$  808.3052, found 808.3080.

To a vigorously stirring solution of the above product **42** (0.46 g, 0.6 mmol) in  $CH_2Cl_2/H_2O$  (24 mL, v/v = 2:1), were added TEMPO (2 mg, 0.01 mmol) and BAIB (0.48 g, 1.5 mmol). Stirring was continued until TLC indicated complete conversion of the starting material to a spot of lower  $R_f$  (about 3 h). The reaction was quenched by the addition of aqueous  $Na_2SO_3$  (20 mL). The mixture was acidized with 5% HCl, then extracted with  $CH_2Cl_2$  three times. The combined organic layers were washed with brine (25 mL), and then dried over  $Na_2SO_4$  and filtered. The filtrate was concentrated in vacuo, the residue was co-evaporated with toluene twice.

The above oily residue was dissolved in DMF (5 mL) at 0 °C, then  $K_2CO_3$  (0.24 g, 2.4 mmol) and an excess of methyl iodide (0.3 mL, 4.8 mmol) were added. Stirring was continued until TLC indicated disappearance of the starting material (about 3 h). The excess methyl iodide was quenched by the addition of AcOH. The mixture was concentrated in vacuo. The oily residue was diluted with  $CH_2Cl_2$  and washed with saturated sodium bicarbonate and brine. The organic layers were dried over  $Na_2SO_4$  and filtered. The filtrate was concentrated in vacuo. The residue was purified by silica gel column chromatography (petroleum ether/EtOAc = 3:1) to yield **45** (0.38 g, 78% for 2 steps) as a white solid:  $[\alpha]_D^{27}$  = 85.7 ( $c$  0.7,  $CHCl_3$ );  $^1H$  NMR (400 MHz,  $CDCl_3$ )  $\delta$  7.94 (d,  $J$  = 7.2 Hz, 2 H), 7.93–7.24 (m, 15 H), 6.98 (d,  $J$  = 8.4 Hz, 2 H), 5.17 (t,  $J$  = 9.2 Hz, 1 H), 5.10 (d,  $J$  = 7.2 Hz, 1 H), 4.77–4.70 (m, 3

H), 4.63 (t,  $J = 12.0$  Hz, 2 H), 4.45 (d,  $J = 7.6$  Hz, 1 H), 2.22 (d,  $J = 8.0$  Hz, 1 H), 4.02 (t,  $J = 9.6$  Hz, 1 H), 3.97–3.93 (m, 1 H), 3.81 (s, 3 H), 3.83–3.79 (m, 1 H), 3.70–3.67 (dd,  $J = 2.0, 10.8$  Hz, 1 H), 3.65 (d,  $J = 9.6$  Hz, 1 H), 3.56 (s, 3 H), 3.44–3.32 (m, 4 H), 3.28 (s, 3 H), 3.04 (d,  $J = 2.8$  Hz, 1 H);  $^{13}\text{C}$  NMR (100 MHz,  $\text{CDCl}_3$ )  $\delta$  169.6, 164.7, 159.7, 138.6, 138.0, 133.4, 130.2, 129.83, 129.75, 129.6, 129.5, 128.5, 128.3, 128.2, 128.0, 127.7, 127.6, 127.3, 114.2, 100.4, 98.8, 81.3, 80.0, 77.4, 75.1, 74.7, 74.1, 73.3, 73.1, 72.3, 70.0, 66.8, 62.9, 55.4, 55.3, 52.6; ESI-MS  $m/z$  calcd for  $\text{C}_{43}\text{H}_{47}\text{N}_3\text{O}_{13}\text{Na}$   $[\text{M}+\text{Na}]^+$  836.3001, found 836.3002.

### Methyl (methyl

### 2,3-*O*-benzyl- $\beta$ -D-glucopyranosyluronate)-(1 $\rightarrow$ 4)-2-azido-3-*O*-benzyl-2-deoxy-6-*O*-benzoyl- $\alpha$ -D-glucopyranoside (**46**)

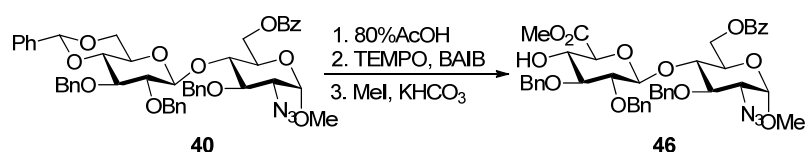

Disaccharide **40** (0.84 g, 1.0 mmol) was dissolved in  $\text{CH}_3\text{CO}_2\text{H}/\text{H}_2\text{O}$  (10 mL, v/v = 8:2). The mixture was heated at 80 °C until TLC indicated disappearance of the starting material. The mixture was concentrated in vacuo. The residue was purified by silica gel column chromatography (petroleum ether/EtOAc = 1:1) to give the 4'6'-diol **43** (0.71 g, 91%) as a white solid: ESI-MS ( $m/z$ ) 773.5  $[\text{M}+\text{NH}_4]^+$ , 778.3  $[\text{M}+\text{Na}]^+$ .

To a vigorously stirring solution of the above product (0.62 g, 0.82 mmol) in  $\text{CH}_2\text{Cl}_2/\text{H}_2\text{O}$  (24 mL, v/v = 2:1) were added TEMPO (3 mg, 0.02 mmol) and BAIB (0.66 g, 2.05 mmol). Stirring was continued until TLC indicated complete conversion of the starting material to a spot of lower  $R_f$  (about 3 h). The reaction was quenched by the addition of aqueous  $\text{Na}_2\text{SO}_3$  (20 mL). The mixture was acidized with 5% HCl, then extracted with  $\text{CH}_2\text{Cl}_2$  three times. The combined organic layers were washed with brine (25 mL), and then were dried over  $\text{Na}_2\text{SO}_4$  and filtered. The filtrate was concentrated in vacuo, the residue was co-evaporated with toluene twice.

The above oily residue was dissolved in DMF (10 mL) at 0 °C, then  $\text{K}_2\text{CO}_3$  (0.33 g, 3.3 mmol) and an excess of methyl iodide (0.4 mL, 6.4 mmol) were added. Stirring was continued until TLC indicated disappearance of the starting material (about 3 h). The excess methyl iodide was quenched by the addition of AcOH. The mixture was concentrated in vacuo. The oily residue was diluted with  $\text{CH}_2\text{Cl}_2$  and washed with saturated sodium bicarbonate and brine. The organic layers were dried over  $\text{Na}_2\text{SO}_4$  and filtered. The filtrate was concentrated in vacuo. The residue was purified by silica gel column chromatography (petroleum ether/EtOAc = 4:1) to yield **46** (0.54 g, 84% for 2 steps) as a white solid:  $[\alpha]_{\text{D}}^{25} = 67.3$  ( $c$  0.9,  $\text{CHCl}_3$ );  $^1\text{H}$  NMR (400 MHz,  $\text{CDCl}_3$ )  $\delta$  8.00 (d,  $J = 7.6$  Hz, 2 H), 7.58 (t,  $J = 7.4$  Hz, 1 H), 7.44 (dd,  $J = 14.1, 7.2$  Hz, 4 H), 7.38–7.13 (m, 13 H), 5.11 (d,  $J = 10.6$  Hz, 1 H), 4.92–4.77 (m, 4 H), 4.73 (d,  $J = 3.6$  Hz, 1 H), 4.72–4.63 (m, 2 H), 4.57 (d,  $J = 7.3$  Hz, 1 H), 4.47

(dd,  $J = 12.2, 4.4$  Hz, 1 H), 4.01 (t,  $J = 9.3$  Hz, 1 H), 3.88 (t,  $J = 9.4$  Hz, 2 H), 3.78 (dd,  $J = 9.4, 3.2$  Hz, 1 H), 3.67 (d,  $J = 9.8$  Hz, 1 H), 3.59 (s, 3 H), 3.54–3.34 (m, 6 H), 2.74 (s, 1 H);  $^{13}\text{C}$  NMR (101 MHz,  $\text{CDCl}_3$ )  $\delta$  169.4, 166.0, 138.5, 138.3, 138.2, 133.4, 129.7, 128.7, 128.5, 128.4, 128.1, 128.1, 128.0, 127.9, 127.8, 103.1, 98.6, 83.6, 82.0, 78.4, 77.9, 75.7, 75.6, 74.5, 72.1, 69.1, 63.0, 62.6, 55.6, 52.7; ESI-MS  $m/z$  806.5  $[\text{M}+\text{Na}^+]$ ; HRMS (MALDI/DHB) calcd for  $\text{C}_{42}\text{H}_{45}\text{N}_3\text{O}_{12}\text{Na}$  806.2896, found 806.2930.

#### *tert*-Butyldimethylsilyl

#### (2-*O*-benzoyl-3-*O*-benzyl-4,6-*O*-benzylidene- $\alpha$ -L-iduopyranosyl)

#### -(1 $\rightarrow$ 4)-2-azido-6-*O*-benzoyl-3-*O*-benzyl-2-deoxy- $\alpha$ -D-glucopyranoside (**47**)

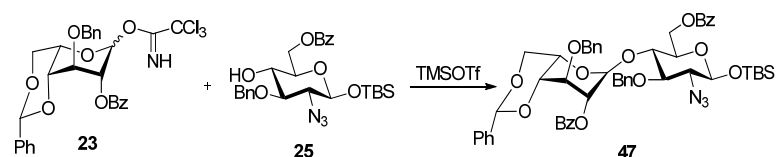

Trichloroacetimidate **23** (0.5 g, 0.82 mmol) and acceptor **25** (0.39 g, 0.75 mmol) were dissolved in  $\text{CH}_2\text{Cl}_2$  (10 mL) under nitrogen. Powdered freshly activated 4 Å molecular sieves (1.0 g) were added, and the mixture was stirred for 1 hour at ambient temperature and then cooled to  $-30^\circ\text{C}$ . TMSOTf (8  $\mu\text{L}$ , 0.08 mmol) was added to the mixture, and stirring was continued until TLC indicated disappearance of the imidate (about 30 min). The reaction was quenched by the addition of  $\text{Et}_3\text{N}$ . The mixture was filtered, and the filtrate was concentrated in vacuo. The residue was purified by silica gel column chromatography (petroleum ether/ $\text{EtOAc}/\text{CH}_2\text{Cl}_2 = 8:1:1$ ) to give **47** (0.78 g, 97%) as a white solid:  $[\alpha]_{\text{D}}^{26} = -1.8$  ( $c$  3.3,  $\text{CHCl}_3$ );  $^1\text{H}$  NMR (400 MHz,  $\text{CDCl}_3$ )  $\delta$  8.01 (d,  $J = 7.5$  Hz, 2H), 7.90 (d,  $J = 7.6$  Hz, 2H), 7.54–7.15 (m, 21H), 5.37 (s, 1H), 5.25 (d,  $J = 7.8$  Hz, 2H), 4.92–4.77 (m, 3H), 4.68 (d,  $J = 11.5$  Hz, 1H), 4.60 (t,  $J = 8.4$  Hz, 2H), 4.39 (dd,  $J = 11.6, 5.9$  Hz, 1H), 4.06 (s, 1H), 3.97–3.87 (m, 3H), 3.85 (s, 1H), 3.73–3.63 (m, 1H), 3.42 (t,  $J = 8.7$  Hz, 1H), 3.31 (dd,  $J = 20.3, 11.1$  Hz, 2H), 0.88 (s, 9H), 0.10 (d,  $J = 8.1$  Hz, 6H);  $^{13}\text{C}$  NMR (100 MHz,  $\text{CDCl}_3$ )  $\delta$  166.0, 165.8, 138.3, 138.1, 137.8, 133.2, 133.1, 130.2, 129.9, 129.5, 128.9, 128.6, 128.5, 128.4, 128.3, 128.2, 127.8, 127.7, 126.5, 100.8, 98.2, 97.4, 81.3, 75.1, 74.8, 74.4, 74.1, 73.6, 72.3, 69.4, 69.2, 66.7, 63.3, 60.3, 25.7, 18.1,  $-4.2, -5.2$ ; ESI-MS  $m/z$   $\text{C}_{53}\text{H}_{59}\text{N}_3\text{O}_{12}\text{SiNa}$   $[\text{M}+\text{Na}]^+$  980.3760, found 980.3767.

#### *tert*-Butyldimethylsilyl (methyl)

#### 2-*O*-benzoyl-3,4-*O*-dibenzyl- $\alpha$ -L-iduopyranosyluronate)-(1 $\rightarrow$ 4)-2-azido-6-*O*-benzoyl-3-*O*-benzyl-2-deoxy- $\alpha$ -D-glucopyranoside (**48**)

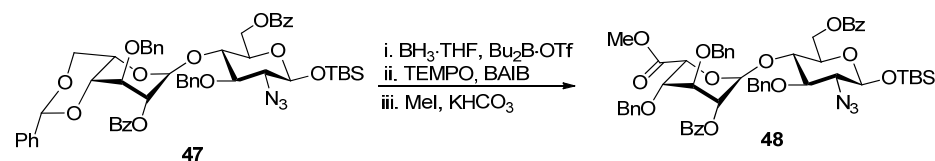

Disaccharide **47** (0.6 g, 0.63 mmol) was dissolved in  $\text{BH}_3 \cdot \text{THF}$  (1 M, 6.3 mL, 6.3 mmol) under nitrogen and cooled to 0 °C. After 15 min,  $\text{Bu}_2\text{B} \cdot \text{OEt}_2$  (1 M, 1.2 mL, 1.2 mmol) was added dropwise and stirring was continued at 0 °C for 2 h. The reaction was quenched by the addition of  $\text{Et}_3\text{N}$  and the excess  $\text{BH}_3$  was consumed by slowly adding methanol. The solvent was removed in vacuo, the residue was co-evaporated with methanol twice. The residue was purified by silica gel column chromatography (petroleum ether/ $\text{EtOAc}$  = 5:1) to give the 6'-ol (0.55 g, 95%) as a white solid.

To a vigorously stirring solution of the above product in  $\text{CH}_2\text{Cl}_2/\text{H}_2\text{O}$  (60 mL, v/v = 2:1) were added TEMPO (10 mg, 0.06 mmol) and BAIB (0.78 g, 2.4 mmol). Stirring was continued until TLC indicated complete conversion of the starting material to a spot of lower  $R_f$  (about 3 h). The reaction was quenched by the addition of aqueous  $\text{Na}_2\text{SO}_3$  (60 mL). The mixture was acidized with 5% HCl, then extracted with  $\text{CH}_2\text{Cl}_2$  three times. The combined organic layers were washed with brine (50 mL), and then dried over  $\text{Na}_2\text{SO}_4$  and filtered. The filtrate was concentrated in vacuo, the residue was co-evaporated with toluene twice.

The above oily residue was dissolved in DMF (6 mL) at 0 °C, then  $\text{K}_2\text{CO}_3$  (0.25 g, 2.4 mmol) and an excess of methyl iodide (0.3 mL, 4.8 mmol) were added. Stirring was continued until TLC indicated disappearance of the starting material (about 3 h). The excess methyl iodide was quenched by the addition of AcOH. The mixture was concentrated in vacuo. The oily residue was diluted with  $\text{CH}_2\text{Cl}_2$  and washed with saturated sodium bicarbonate and brine. The organic layers were dried over  $\text{Na}_2\text{SO}_4$  and filtered. The filtrate was concentrated in vacuo. The residue was purified by silica gel column chromatography (petroleum ether/ $\text{EtOAc}$  = 4:1) to yield **48** (0.48 g, 77% for 2 steps) as a white solid:  $[\alpha]_{\text{D}}^{24} = -8.1$  ( $c$  1.7,  $\text{CHCl}_3$ );  $^1\text{H}$  NMR (400 MHz,  $\text{CDCl}_3$ )  $\delta$  8.01 (d,  $J$  = 7.3 Hz, 2H), 7.96 (d,  $J$  = 7.3 Hz, 2H), 7.59–7.06 (m, 21H), 5.47 (d,  $J$  = 4.0 Hz, 1H), 5.18 (t,  $J$  = 3.9 Hz, 1H), 4.88–4.60 (m, 7H), 4.54–4.36 (m, 4H), 4.06–3.82 (m, 3H), 3.58 (dd,  $J$  = 7.8, 5.6 Hz, 1H), 3.49 (s, 3H), 3.39–3.28 (m, 2H), 0.86 (s, 9H), 0.07 (d,  $J$  = 6.8 Hz, 6H);  $^{13}\text{C}$  NMR (100 MHz,  $\text{CDCl}_3$ )  $\delta$  169.9, 166.1, 165.6, 138.3, 137.7, 137.4, 133.4, 133.0, 130.1, 130.0, 129.4, 129.2, 128.5, 128.5, 128.4, 128.34, 128.30, 128.1, 128.1, 128.0, 127.6, 98.2, 97.3, 80.9, 75.9, 75.2, 75.1, 74.3, 73.7, 73.1, 72.9, 70.5, 70.2, 68.7, 63.1, 51.9, 25.7, 18.0, -4.2, -5.1; ESI-MS  $m/z$  calcd for  $\text{C}_{54}\text{H}_{61}\text{N}_3\text{O}_{13}\text{SiNa}$   $[\text{M}+\text{Na}]^+$  1010.3866, found 1010.3816.

### (Methyl

**2-*O*-benzoyl-3,4-*O*-dibenzyl- $\alpha$ -L-iduopyranosyluronate)-(1→4)-2-azido-6-*O*-benzoyl-3-*O*-benzyl-2-deoxy- $\alpha/\beta$ -D-glucopyranosyl *N*-phenyltrifluoroacetimidate (**49**)**

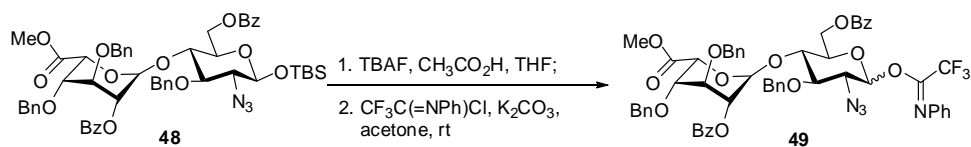

Disaccharide **48** (0.68 g, 0.69 mmol) was dissolved in THF (7 mL) followed by the

addition of AcOH (0.12 mL, 2.1 mmol) and TBAF in THF (1 M, 1.4 mL, 1.4 mmol). Stirring was continued until TLC indicated disappearance of the starting material (about 3 h). The mixture was diluted with CH<sub>2</sub>Cl<sub>2</sub> and washed with saturated aqueous sodium bicarbonate and brine. The organic phase was dried with Na<sub>2</sub>SO<sub>4</sub> and filtered. The filtrate was concentrated in vacuo. The residue was chromatographed over silica gel (petroleum ether ether/EtOAc = 4:1) to give the hemiacetal (0.55 g, 92%) as a colorless oil: ESI-MS *m/z* 891.8 [M+NH<sub>4</sub>]<sup>+</sup>, 896.7 [M+Na]<sup>+</sup>.

The above hemiacetal (420 mg, 0.48 mmol) was dissolved in acetone (5 mL). *N*-Phenyl-trifluoroacetimidoyl chloride (80  $\mu$ L, 0.72 mmol) and K<sub>2</sub>CO<sub>3</sub> (170 mg, 1.2 mmol) were added successively. Stirring was continued until TLC indicated disappearance of the starting material (about 2 h). The mixture was concentrated. The residue was purified by silica gel column chromatography (petroleum ether/EtOAc = 4:1, containing 1% Et<sub>3</sub>N) to give **49** (491 mg, 98%) as a white solid: <sup>1</sup>H NMR (400 MHz, CDCl<sub>3</sub>)  $\delta$  8.13–7.88 (m, 4 H), 7.72–6.98 (m, 27 H), 6.74 (s, 2 H), 5.51 (dd, *J* = 16.6, 4.8 Hz, 1 H), 5.20 (d, *J* = 20.1 Hz, 1 H), 4.96 (dd, *J* = 25.0, 10.6 Hz, 1 H), 4.86–4.58 (m, 5 H), 4.57–4.36 (m, 3 H), 4.18 (dt, *J* = 18.7, 9.6 Hz, 1 H), 4.04 (s, 1 H), 3.99–3.84 (m, 2 H), 3.69 (brs, 1 H), 3.46 (d, *J* = 7.5 Hz, 3 H); ESI-MS *m/z* 1068.1 [M+Na]<sup>+</sup>, 1083.8 [M+K]<sup>+</sup>.

#### Methyl

#### (2-*O*-benzoyl-3-*O*-benzyl-4,6-*O*-benzylidene- $\alpha$ -L-iduopyranosyl)-(1 $\rightarrow$ 4)-2-azido-6-*O*-benzoyl-3-*O*-benzyl-2-deoxy- $\alpha$ -D-glucopyranoside (**50**)

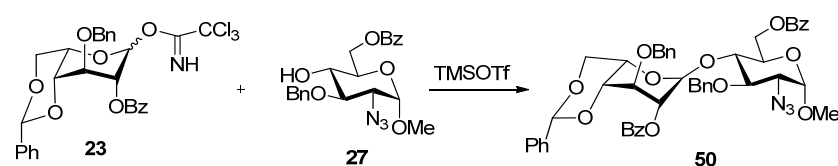

Trichloroacetimidate **23** (0.5 g, 0.82 mmol) and acceptor **27** (0.31 g, 0.75 mmol) were dissolved in CH<sub>2</sub>Cl<sub>2</sub> (20 mL) under nitrogen. Powdered freshly activated 4 Å molecular sieves (1.5 g) were added, and the mixture was stirred for 1 hour at ambient temperature and then cooled to -30 °C. TMSOTf (15  $\mu$ L, 0.08 mmol) was added to the mixture, and stirring was continued until TLC indicated disappearance of the imidate (about 30 min). The reaction was quenched by the addition of Et<sub>3</sub>N. The mixture was filtered, and the filtrate was concentrated in vacuo. The residue was purified by silica gel column chromatography (petroleum ether/EtOAc/CH<sub>2</sub>Cl<sub>2</sub> = 10:1:1) to give **50** (0.64 g, 91%) as a white solid:  $[\alpha]_D^{26}$  = 51.0 (*c* 3.0, CHCl<sub>3</sub>); <sup>1</sup>H NMR (400 MHz, CDCl<sub>3</sub>)  $\delta$  8.01 (d, *J* = 8.0 Hz, 2 H), 7.90 (d, *J* = 7.9 Hz, 2 H), 7.62–7.14 (m, 21 H), 5.36 (s, 1 H), 5.27 (s, 2 H), 4.88–4.77 (m, 4 H), 4.75–4.64 (m, 2 H), 4.44 (d, *J* = 12.9 Hz, 1 H), 4.08–3.95 (m, 3 H), 3.94–3.78 (m, 4 H), 3.50 (dd, *J* = 10.1, 3.5 Hz, 1 H), 3.46 (s, 3 H), 3.21 (d, *J* = 12.7 Hz, 1 H); <sup>13</sup>C NMR (100 MHz, CDCl<sub>3</sub>)  $\delta$  166.1, 165.8, 138.2, 137.7, 133.2, 133.1, 130.2, 129.9, 129.5, 128.9, 128.8, 128.6, 128.5, 128.4, 128.3, 128.24, 128.15, 127.8, 127.6, 126.5, 100.8, 98.6, 98.1, 79.1, 75.0, 74.8, 74.6, 73.5, 72.4, 69.8, 69.3, 66.7, 64.2, 63.0, 60.5, 60.3, 55.5; ESI-MS *m/z* calcd for C<sub>48</sub>H<sub>47</sub>N<sub>3</sub>O<sub>12</sub>Na [M+Na]<sup>+</sup> 880.3052, found 880.3070.

**Methyl (benzyl 2-*O*-benzoyl-3-*O*-benzyl- $\alpha$ -L-iduopyranosyluronate)-(1 $\rightarrow$ 4)-2-azido-6-*O*-benzoyl-3-*O*-benzyl-2-deoxy- $\alpha$ -D-glucopyranoside (**52**)**

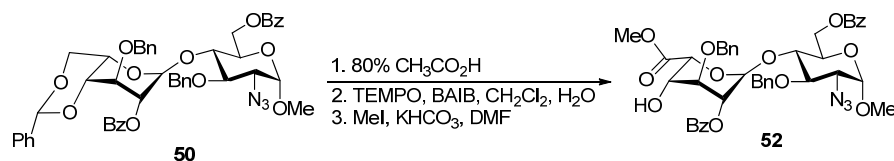

Disaccharide **50** (0.6 g, 0.71 mmol) was dissolved in CH<sub>3</sub>CO<sub>2</sub>H/H<sub>2</sub>O (15 mL, v/v = 8:2). The mixture was heated at 80 °C until TLC indicated disappearance of the starting material. The mixture was concentrated in vacuo.

To a vigorously stirring solution of the above product **51** in CH<sub>2</sub>Cl<sub>2</sub>/H<sub>2</sub>O (18 mL, v/v = 2/1) were added TEMPO (6 mg, 0.03 mmol) and BAIB (0.54 g, 1.7 mmol). Stirring was continued until TLC indicated complete conversion of the starting material to a spot of lower R<sub>f</sub> (~ 3 h). The reaction was quenched by the addition of aqueous Na<sub>2</sub>SO<sub>3</sub> (20 mL). The mixture was acidized with 5% HCl, then extracted with CH<sub>2</sub>Cl<sub>2</sub> three times. The combined organic layers were washed with brine (25 mL), and then were dried over Na<sub>2</sub>SO<sub>4</sub> and filtered. The filtrate was concentrated in vacuo, the residue was co-evaporated with toluene twice.

The above oily residue was dissolved in DMF (10 mL) at 0 °C, then K<sub>2</sub>CO<sub>3</sub> (0.28 g, 2.8 mmol) and an excess of methyl iodide (0.35 mL, 5.6 mmol) were added. Stirring was continued until TLC indicated disappearance of the starting material (about 3 h). The excess methyl iodide was quenched by the addition of AcOH. The mixture was concentrated in vacuo. The oily residue was diluted with CH<sub>2</sub>Cl<sub>2</sub> and washed with saturated sodium bicarbonate and brine. The organic layers were dried over Na<sub>2</sub>SO<sub>4</sub> and filtered. The filtrate was concentrated in vacuo. The residue was purified by silica gel column chromatography (petroleum ether/EtOAc = 4:1) to yield **52** (0.46 g, 80% for 3 steps) as a white solid:  $[\alpha]_D^{26} = 44.0$  (*c* 1.8, CHCl<sub>3</sub>); <sup>1</sup>H NMR (400 MHz, CDCl<sub>3</sub>)  $\delta$  8.03 (d, *J* = 7.4 Hz, 2 H), 7.92 (d, *J* = 7.4 Hz, 2 H), 7.60–7.15 (m, 16 H), 5.38 (s, 1 H), 5.22 (s, 1 H), 4.97 (d, *J* = 2.1 Hz, 1 H), 4.92–4.64 (m, 6 H), 4.49 (dd, *J* = 12.2, 4.0 Hz, 1 H), 4.09–3.83 (m, 5 H), 3.50–3.36 (m, 6 H), 2.66 (d, *J* = 10.4 Hz, 1 H); <sup>13</sup>C NMR (100 MHz, CDCl<sub>3</sub>)  $\delta$  175.01, 169.70, 166.08, 165.14, 160.52, 137.80, 137.34, 133.64, 133.11, 129.94, 129.85, 129.80, 129.76, 128.87, 128.69, 128.55, 128.52, 128.43, 128.20, 128.12, 128.01, 127.71, 127.47, 98.50, 98.13, 78.74, 75.48, 75.37, 74.90, 72.76, 69.31, 69.22, 68.47, 67.99, 63.81, 62.75, 55.42, 52.04; ESI-MS *m/z* calcd for C<sub>42</sub>H<sub>43</sub>N<sub>3</sub>O<sub>13</sub>Na [M+Na<sup>+</sup>] 820.2659, found 820.2688.

**Methyl (methyl 2-*O*-benzoyl-3,4-*O*-dibenzyl- $\beta$ -D-glucopyranosyluronate)-(1 $\rightarrow$ 4)-(2-azido-6-*O*-benzoyl-3-*O*-benzyl-2-deoxy- $\alpha$ / $\beta$ -D-glucopyranosyl)-(1 $\rightarrow$ 4)-(methyl 2-*O*-benzoyl-3-*O*-benzyl- $\beta$ -D-glucopyranosyluronate)-(1 $\rightarrow$ 4)-2-azido-6-*O*-benzoyl-3-*O*-benzyl-2-deoxy- $\alpha$ -D-glucopyranoside (**53**)**

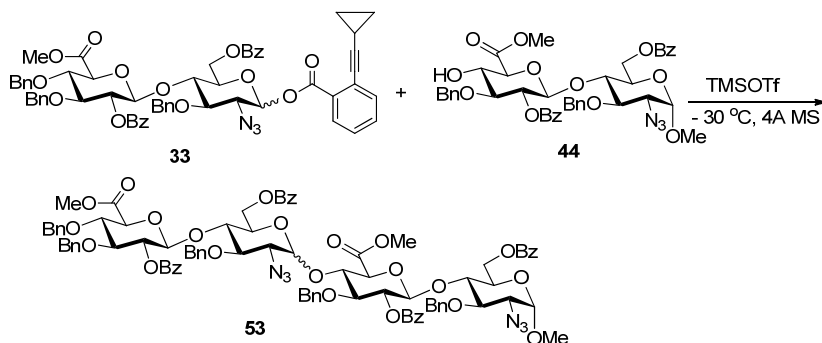

#### General Procedure for the Preparation of Tetrasaccharides with

***ortho*-alkynylbenzoate Donors.** Disaccharide *ortho*-alkynylbenzoate **33** (1.2 equiv) and disaccharide acceptor **44** (1.0 equiv) were dissolved in a solvent to maintain a concentration of 0.04~0.05 M. Powdered freshly activated 4Å molecular sieves (the weight of the sieves is equal to the combined weight of the donor and acceptor) were added, and the mixture was stirred for 1 hour at room temperature. A freshly prepared gold(I)-catalyst (0.1 equiv) was added, and stirring was continued until TLC indicated the disappearance of the donor. The reaction was quenched by the addition of Et<sub>3</sub>N (0.5 mL). The mixture was filtered, and the filtrate was concentrated in vacuo. The residue was purified by silica gel column chromatography using a gradient of toluene and EtOAc to give α-tetrasaccharide and β-tetrasaccharide respectively.

#### General Procedure for the Preparation of Tetrasaccharides with

**Trichloroacetimidate Donors.** Disaccharide trichloroacetimidate donor (1.2 equiv) and disaccharide acceptor (1.0 equiv) were combined in a flask and co-evaporated with toluene (3 × 3 mL), and were then dissolved in a solvent to maintain a concentration of 0.04~0.05 M. Powdered freshly activated 4Å molecular sieves (the weight of the sieves is equal to the combined weight of the donor and acceptor) were added, and the mixture was stirred for 1 hour at ambient temperature and then cooled to -30 °C. TMSOTf (0.1 equiv) was added, and stirring was continued until TLC indicated the disappearance of the donor (2 hour). The reaction was quenched by the addition of Et<sub>3</sub>N (0.5 mL). The mixture was filtered, and the filtrate was concentrated in vacuo. The residue was purified by silica gel column chromatography using a gradient of toluene and EtOAc to give α-tetrasaccharide and β-tetrasaccharide respectively.

#### General Procedure for the Preparation of Tetrasaccharides with *N*-phenyl

**Trifluoroacetimidate Donors.** Disaccharide *N*-phenyltrifluoroacetimidate donor (1.2 equiv) and disaccharide acceptor (1.0 equiv) were combined in a flask and co-evaporated with toluene (3 × 3 mL), and were then dissolved in a solvent to maintain a concentration of 0.04~0.05 M. Powdered freshly activated 4Å molecular sieves (its weight is equal to the combined weight of the donor and acceptor) were added, and the mixture was stirred for 1 hour at ambient temperature and then cooled to -30 °C. TMSOTf (0.1 equiv) was added, and stirring was continued until TLC

indicated the disappearance of the donor (2 hour). The reaction was quenched by the addition of Et<sub>3</sub>N (0.5 mL). The mixture was filtered, and the filtrate was concentrated in vacuo. The residue was purified by silica gel column chromatography using a gradient of toluene and EtOAc to give the  $\alpha$ -tetrasaccharide and  $\beta$ -tetrasaccharide, respectively.

**53 $\alpha$ :** [ $\alpha$ ]<sub>D</sub><sup>28</sup> = +50.0 (*c* 1.1, CHCl<sub>3</sub>); <sup>1</sup>H NMR (400 MHz, CDCl<sub>3</sub>)  $\delta$  8.11–7.91 (m, 8 H), 7.61–7.02 (m, 37 H), 5.40–5.34 (m, 3 H), 5.17 (d, *J* = 10.4 Hz, 1 H), 5.03 (d, *J* = 10.8 Hz, 1 H), 4.75–4.55 (m, 11 H), 4.43 (d, *J* = 10.0 Hz, 4 H), 4.18 (t, *J* = 9.2 Hz, 1 H), 3.97–3.90 (dd, *J* = 9.2, 19.6 Hz, 2 H), 3.88–3.84 (m, 3 H), 3.79–3.68 (m, 5 H), 3.50 (s, 3 H), 3.42 (d, *J* = 10.0 Hz, 1 H), 3.31 (s, 3 H), 3.26–3.23 (dd, *J* = 4.4, 10.4 Hz, 2 H), 2.98 (s, 3H); <sup>13</sup>C NMR (100 MHz, CDCl<sub>3</sub>)  $\delta$  168.0, 167.6, 166.0, 165.9, 164.8, 164.7, 138.0, 137.9, 137.4, 137.3, 137.1, 133.5, 133.4, 129.8, 129.7, 129.6, 129.54, 129.48, 129.0, 129.0, 128.9, 128.7, 128.64, 128.59, 128.5, 128.4, 128.3, 128.2, 127.94, 127.89, 127.7, 127.61, 127.55, 101.4, 101.0, 98.6, 97.2, 82.6, 81.9, 79.4, 78.2, 78.0, 77.6, 77.2, 76.8, 75.6, 75.3, 75.0, 74.8, 74.7, 74.4, 74.2, 73.7, 73.4, 69.1, 68.7, 63.0, 62.6, 62.3, 61.9, 55.4, 52.4, 51.9; ESI-MS *m/z* calcd for C<sub>90</sub>H<sub>88</sub>N<sub>6</sub>O<sub>25</sub>Na [M+Na]<sup>+</sup> 1675.5691, found 1675.5698.

**53 $\beta$ :** [ $\alpha$ ]<sub>D</sub><sup>28</sup> = +24.6 (*c* 0.7, CHCl<sub>3</sub>); <sup>1</sup>H NMR (400 MHz, CDCl<sub>3</sub>)  $\delta$  8.03 (d, *J* = 7.2 Hz, 2H), 7.90–7.84 (m, 6H), 7.56–6.74 (m, 37H), 5.32 (t, *J* = 8.4 Hz, 1H), 5.22 (t, *J* = 8.4 Hz, 1H), 5.07 (d, *J* = 7.6 Hz, 1H), 5.05 (d, *J* = 8.0 Hz, 1H), 4.75–4.54 (m, 10H), 4.87 (d, *J* = 12.0 Hz, 1H), 4.44–4.41 (m, 1H), 4.32–4.26 (m, 4H), 4.19 (t, *J* = 8.8 Hz, 1H), 3.96–3.67 (m, 9H), 3.61 (s, 3H), 3.51 (s, 3H), 3.36–3.27 (m, 4H), 3.29 (s, 3H); <sup>13</sup>C NMR (100 MHz, CDCl<sub>3</sub>)  $\delta$  168.1, 165.9, 165.8, 164.9, 164.7, 138.11, 138.06, 137.7, 137.52, 137.45, 133.5, 133.31, 133.26, 133.2, 129.9, 129.8, 129.5, 129.3, 129.1, 129.0, 128.7, 128.51, 128.48, 128.42, 128.37, 128.33, 128.3, 128.00, 127.95, 127.90, 127.82, 127.74, 127.66, 127.60, 127.53, 127.2, 101.9, 101.4, 101.1, 98.6, 81.7, 80.8, 79.38, 79.32, 79.25, 78.1, 78.0, 77.3, 77.2, 77.0, 76.7, 75.8, 75.6, 75.2, 75.1, 74.7, 74.5, 74.3, 73.5, 72.96, 72.94, 68.7, 66.2, 63.0, 62.4, 62.3, 55.4, 52.8, 52.4; ESI-MS *m/z* calcd for C<sub>90</sub>H<sub>88</sub>N<sub>6</sub>O<sub>25</sub>Na [M+Na]<sup>+</sup> 1675.5691, found 1675.5698.

### Methyl (methyl

**2-*O*-benzoyl-3,4-*O*-dibenzyl- $\beta$ -D-glucopyranosyluronate)-(1 $\rightarrow$ 4)-(2-azido-6-*O*-benzoyl-3-*O*-benzyl-2-deoxy- $\alpha$ / $\beta$ -D-glucopyranosyl)-(1 $\rightarrow$ 4)-(methyl 2,3-*O*-dibenzyl- $\beta$ -D-glucopyranosyluronate)-(1 $\rightarrow$ 4)-2-azido-6-*O*-benzoyl-3-*O*-benzyl-2-deoxy- $\alpha$ -D-glucopyranoside (54)**

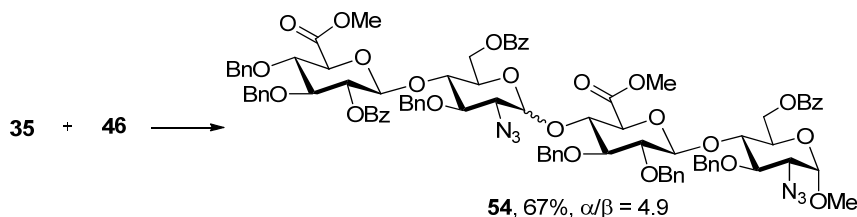

**54 $\alpha$**  (99.7 mg, 55.6%; a white solid): [ $\alpha$ ]<sub>D</sub><sup>28</sup> = +82.9 (*c* 1.0, CHCl<sub>3</sub>); <sup>1</sup>H NMR (400

MHz, CDCl<sub>3</sub>)  $\delta$  8.15 (d,  $J$  = 7.8 Hz, 2 H), 8.09 (d,  $J$  = 7.9 Hz, 2 H), 8.04 (d,  $J$  = 7.9 Hz, 2 H), 7.76–7.06 (m, 39 H), 5.55 (d,  $J$  = 3.5 Hz, 1 H), 5.43 (t,  $J$  = 8.5 Hz, 1 H), 5.24 (d,  $J$  = 10.5 Hz, 1 H), 5.09 (d,  $J$  = 10.2 Hz, 1 H), 5.02 (d,  $J$  = 10.7 Hz, 1 H), 4.91–4.42 (m, 16 H), 4.18–3.93 (m, 4 H), 3.93–3.68 (m, 7 H), 3.63–3.44 (m, 8 H), 3.41 (dd,  $J$  = 10.0, 3.2 Hz, 1 H), 3.31 (dd,  $J$  = 10.2, 3.5 Hz, 1 H), 3.08 (s, 3 H); <sup>13</sup>C NMR (100 MHz, CDCl<sub>3</sub>)  $\delta$  168.1, 166.1, 165.9, 164.9, 138.1, 137.8, 137.8, 137.5, 137.4, 133.6, 133.5, 129.9, 129.7, 129.6, 129.1, 128.9, 128.8, 128.71, 128.65, 128.51, 128.47, 128.44, 128.40, 128.35, 128.1, 128.0, 127.9, 127.84, 127.79, 127.7, 127.4, 103.0, 100.9, 98.4, 97.2, 84.1, 82.7, 82.0, 79.5, 78.2, 77.9, 77.7, 75.9, 75.8, 75.6, 75.4, 75.1, 74.8, 74.6, 74.2, 73.5, 69.1, 69.0, 63.0, 62.7, 62.3, 62.1, 55.5, 52.5, 51.9; ESI-MS  $m/z$  calcd for C<sub>90</sub>H<sub>90</sub>N<sub>6</sub>O<sub>24</sub>Na [M+Na]<sup>+</sup> 1661.5899, found 1661.5904.

**54 $\beta$**  (20.3 mg, 11.4%; a white solid):  $[\alpha]_D^{28}$  = +49.3 ( $c$  1.2, CHCl<sub>3</sub>); <sup>1</sup>H NMR (400 MHz, CDCl<sub>3</sub>)  $\delta$  7.97 (d,  $J$  = 7.6 Hz, 2 H), 7.89 (d,  $J$  = 7.5 Hz, 2 H), 7.81 (d,  $J$  = 7.6 Hz, 2 H), 7.56–6.77 (m, 39 H), 5.25 (t,  $J$  = 8.6 Hz, 1 H), 5.00 (d,  $J$  = 10.6 Hz, 1 H), 4.94 (d,  $J$  = 10.1 Hz, 1 H), 4.82 (d,  $J$  = 11.3 Hz, 1 H), 4.70–4.42 (m, 14 H), 4.30 (dd,  $J$  = 12.2, 4.0 Hz, 1 H), 4.23 (d,  $J$  = 8.2 Hz, 2 H), 4.12 (d,  $J$  = 11.7 Hz, 1 H), 3.98 (d,  $J$  = 9.2 Hz, 1 H), 3.93–3.80 (m, 3 H), 3.78–3.55 (m, 9 H), 3.52–3.42 (m, 4 H), 3.37–3.23 (m, 6 H), 3.19 (t,  $J$  = 8.9 Hz, 2 H); <sup>13</sup>C NMR (100 MHz, CDCl<sub>3</sub>)  $\delta$  168.5, 168.2, 165.9, 165.9, 165.0, 138.5, 138.2, 138.1, 137.9, 137.6, 137.5, 133.6, 133.4, 123.0, 129.8, 129.68, 129.65, 129.5, 129.1, 128.8, 128.8, 128.6, 128.53, 128.45, 128.42, 128.39, 128.3, 128.1, 128.0, 128.0, 127.9, 127.8, 127.2, 103.0, 101.8, 101.0, 98.8, 98.4, 82.2, 81.9, 81.8, 81.0, 79.6, 79.4, 78.3, 77.8, 75.9, 75.8, 75.7, 75.3, 75.2, 74.8, 74.4, 73.6, 73.0, 69.1, 66.3, 62.9, 62.5, 62.3, 55.6, 52.9, 52.5; ESI-MS  $m/z$  calcd for C<sub>90</sub>H<sub>90</sub>N<sub>6</sub>O<sub>24</sub>Na [M+Na]<sup>+</sup> 1661.5899, found 1661.5904.

### Methyl (methyl

**2-*O*-benzoyl-3,4-*O*-dibenzyl- $\beta$ -D-glucopyranosyluronate)-(1 $\rightarrow$ 4)-(2-azido-6-*O*-benzoyl-3-*O*-benzyl-2-deoxy- $\alpha$ / $\beta$ -D-glucopyranosyl)-(1 $\rightarrow$ 4)-(methyl 3-*O*-dibenzyl-2-*O*-benzoyl- $\alpha$ -L-iduropyranosyluronate)-(1 $\rightarrow$ 4)-2-azido-6-*O*-benzoyl-3-*O*-benzyl-2-deoxy- $\alpha$ -D-glucopyranoside (**55**)**

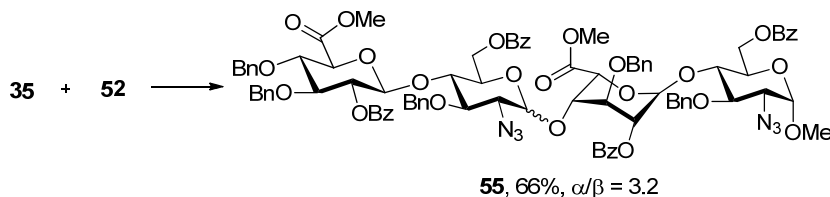

**55 $\alpha$**  (58.7 mg, 50.3%; a white solid):  $[\alpha]_D^{30}$  = +57.2 ( $c$  1.0, CHCl<sub>3</sub>); <sup>1</sup>H NMR (400 MHz, CDCl<sub>3</sub>)  $\delta$  8.11–7.91 (m, 8 H), 7.67–6.93 (m, 37 H), 5.55 (d,  $J$  = 4.8 Hz, 1 H), 5.37 (t,  $J$  = 8.5 Hz, 1 H), 5.18 (t,  $J$  = 5.1 Hz, 1 H), 4.94 (d,  $J$  = 10.5 Hz, 1 H), 4.86 (d,  $J$  = 10.6 Hz, 1 H), 4.81 (d,  $J$  = 3.4 Hz, 1 H), 4.78–4.66 (m, 8 H), 4.64–4.53 (m, 4 H), 4.51–4.31 (m, 5 H), 4.19 (d,  $J$  = 10.6 Hz, 1 H), 4.07 (t,  $J$  = 5.5 Hz, 1 H), 4.04–3.64 (m, 11 H), 3.58–3.44 (m, 4 H), 3.41 (dd,  $J$  = 10.1, 3.6 Hz, 1 H), 3.37 (s, 3 H), 3.30–3.17 (m, 4 H); <sup>13</sup>C NMR (100 MHz, CDCl<sub>3</sub>)  $\delta$  169.4, 168.1, 166.1, 166.0, 165.4, 165.0,

138.0, 137.9, 137.6, 137.5, 133.8, 133.7, 133.6, 133.2, 123.0, 129.9, 129.7, 129.6, 129.3, 129.1, 128.9, 128.8, 128.6, 128.42, 128.35, 128.3, 128.1, 128.0, 128.0, 127.9, 127.7, 127.7, 101.0, 98.5, 98.3, 82.1, 79.5, 78.6, 78.0, 76.5, 75.6, 75.4, 75.3, 75.2, 74.9, 74.7, 73.9, 73.6, 71.0, 70.6, 69.7, 69.3, 63.6, 62.9, 62.7, 62.0, 55.5, 52.6, 51.8; ESI-MS  $m/z$  calcd for  $C_{90}H_{88}N_6O_{25}Na$   $[M+Na]^+$  1675.5691, found 1675.5697.

**55 $\beta$**  (18.3 mg, 15.7%; a white solid):  $[\alpha]_D^{30} = +24.1$  ( $c$  1.1,  $CHCl_3$ );  $^1H$  NMR (400 MHz,  $CDCl_3$ )  $\delta$  7.99 (d,  $J = 7.6$  Hz, 4 H), 7.85 (d,  $J = 7.9$  Hz, 2 H), 7.72 (d,  $J = 7.8$  Hz, 2 H), 7.56–7.01 (m, 37 H), 5.39–5.23 (m, 2 H), 5.03 (t,  $J = 14.5$  Hz, 2 H), 4.88 (s, 1 H), 4.82–4.50 (m, 13 H), 4.50–4.31 (m, 3 H), 4.20 (d,  $J = 11.9$  Hz, 1 H), 4.11–3.68 (m, 12 H), 3.59–3.46 (m, 7 H), 3.46–3.34 (m, 4 H), 3.30 (t,  $J = 9.0$  Hz, 1 H), 3.23–3.15 (m, 1 H), 3.10 (t,  $J = 8.7$  Hz, 1 H);  $^{13}C$  NMR (100 MHz,  $CDCl_3$ )  $\delta$  169.1, 168.2, 166.1, 165.8, 165.3, 164.9, 138.2, 137.9, 137.7, 137.6, 137.5, 133.6, 133.3, 133.2, 133.1, 130.0, 129.9, 129.5, 129.4, 129.1, 128.7, 128.6, 128.5, 128.4, 128.33, 128.26, 128.1, 128.0, 128.0, 127.9, 127.8, 127.7, 127.5, 103.3, 101.3, 98.5, 98.0, 81.8, 81.0, 79.4, 78.9, 77.5, 77.4, 77.2, 76.8, 75.9, 75.7, 75.3, 74.8, 73.9, 73.6, 73.0, 72.5, 69.5, 68.1, 67.5, 66.3, 63.9, 62.9, 62.2, 55.5, 52.6, 52.1; ESI-MS  $m/z$  calcd for  $C_{90}H_{88}N_6O_{25}Na$   $[M+Na]^+$  1675.5691, found 1675.5697.

### Methyl (methyl

**2-*O*-benzoyl-3,4-*O*-dibenzyl- $\beta$ -D-glucopyranosyluronate)-(1 $\rightarrow$ 4)-(2-azido-6-*O*-(4-methoxybenzyl)-3-*O*-benzyl-2-deoxy- $\alpha/\beta$ -D-glucopyranosyl)-(1 $\rightarrow$ 4)-(methyl 2-*O*-benzoyl-3-*O*-benzyl- $\beta$ -D-glucopyranosyluronate)-(1 $\rightarrow$ 4)-2-azido-6-*O*-(4-methoxybenzyl)-3-*O*-benzyl-2-deoxy- $\alpha$ -D-glucopyranoside (56)**

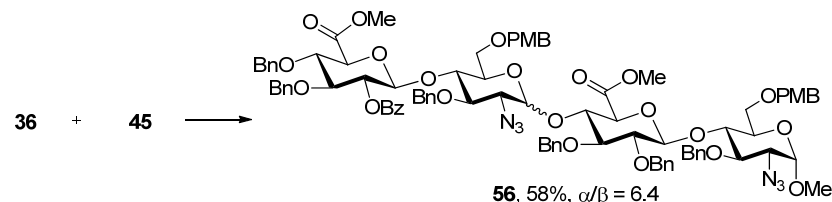

**56 $\alpha$**  (75.2 mg, 50.2%; a white solid):  $[\alpha]_D^{26} = +39.0$  ( $c$  1.4,  $CHCl_3$ );  $^1H$  NMR (400 MHz,  $CDCl_3$ )  $\delta$  7.95–7.85 (m, 4 H), 7.66–6.97 (m, 39 H), 5.45 (d,  $J = 4.0$  Hz, 1 H), 5.27–5.21 (m, 2 H), 5.18 (d,  $J = 10.5$  Hz, 1 H), 5.01 (d,  $J = 10.7$  Hz, 1 H), 4.87–4.41 (m, 12 H), 4.27 (dd,  $J = 12.1, 4.6$  Hz, 2 H), 4.15–4.06 (m, 2 H), 4.05–3.99 (m, 1 H), 3.99–3.91 (m, 2 H), 3.86–3.54 (m, 13 H), 3.46–3.34 (m, 3 H), 3.34–3.23 (m, 5 H), 3.17 (d,  $J = 10.1$  Hz, 1 H), 2.88 (s, 3 H);  $^{13}C$  NMR (100 MHz,  $CHCl_3$ )  $\delta$  168.4, 167.9, 164.7, 164.6, 159.9, 159.8, 138.3, 137.9, 137.8, 137.3, 133.6, 130.6, 130.4, 129.9, 129.8, 129.8, 129.7, 129.5, 129.4, 129.2, 128.9, 128.7, 128.5, 128.4, 128.3, 128.2, 128.0, 127.8, 127.7, 127.6, 127.5, 125.4, 114.4, 100.3, 100.1, 98.9, 97.3, 83.0, 82.5, 79.7, 77.8, 77.7, 77.4, 76.1, 75.6, 75.5, 75.2, 74.6, 74.2, 73.9, 73.6, 73.5, 73.5, 70.5, 70.0, 66.8, 66.3, 62.9, 62.6, 55.5, 55.4, 55.2, 52.6, 51.7; ESI-MS  $m/z$  calcd for  $C_{92}H_{96}N_6O_{25}Na$   $[M+Na]^+$  1707.6317, found 1707.6323.

**56 $\beta$**  (11.8 mg, 7.8%; a white solid):  $[\alpha]_D^{25} = -2.60$  ( $c$  1.4,  $CHCl_3$ );  $^1H$  NMR (400 MHz,  $CDCl_3$ )  $\delta$  7.90–7.77 (m, 4 H), 7.58 (dd,  $J = 14.9, 7.4$  Hz, 2 H), 7.50–6.84 (m, 37 H),

5.20 (dd,  $J = 9.4, 8.3$  Hz, 1 H), 5.15–4.91 (m, 4 H), 4.74 (d,  $J = 10.8$  Hz, 2 H), 4.71–4.34 (m, 8 H), 4.30–3.88 (m, 8 H), 3.88–3.56 (m, 14 H), 3.56–3.50 (m, 1 H), 3.44 (t,  $J = 9.2$  Hz, 1 H), 3.36 (d,  $J = 9.9$  Hz, 1 H), 3.34–3.23 (m, 8 H), 2.99 (d,  $J = 9.9$  Hz, 1 H);  $^{13}\text{C}$  NMR (100 MHz,  $\text{CDCl}_3$ )  $\delta$  168.5, 168.4, 164.8, 164.7, 159.8, 159.6, 138.7, 138.4, 138.3, 137.9, 137.8, 133.6, 133.3, 130.6, 130.2, 129.9, 129.80, 129.76, 129.71, 129.66, 129.4, 128.7, 128.6, 128.5, 128.38, 128.36, 128.2, 128.0, 127.8, 127.8, 127.7, 127.6, 127.3, 127.1, 114.3, 114.2, 101.9, 100.5, 100.3, 98.8, 82.2, 80.9, 80.6, 79.6, 79.5, 77.9, 76.7, 75.9, 75.7, 75.5, 75.3, 75.2, 75.1, 74.6, 74.5, 74.2, 73.5, 73.4, 73.03, 72.97, 70.1, 66.8, 66.6, 66.4, 62.9, 55.5, 55.4, 55.2, 52.9, 52.6; ESI-MS  $m/z$  calcd for  $\text{C}_{92}\text{H}_{96}\text{N}_6\text{O}_{25}\text{Na}$   $[\text{M}+\text{Na}]^+$  1707.6317, found 1707.6323.

### Methyl (methyl

**2-*O*-benzoyl-3,4-*O*-dibenzyl- $\alpha$ -L-iduopyranosyluronate)-(1 $\rightarrow$ 4)-(2-azido-6-*O*-benzoyl-3-*O*-benzyl-2-deoxy- $\alpha/\beta$ -D-glucopyranosyl)-(1 $\rightarrow$ 4)-(methyl 3-*O*-benzyl-2-*O*-benzyl- $\beta$ -D-glucopyranosyluronate)-(1 $\rightarrow$ 4)-2-azido-6-*O*-benzoyl-3-*O*-benzyl-2-deoxy- $\alpha$ -D-glucopyranoside (57)**

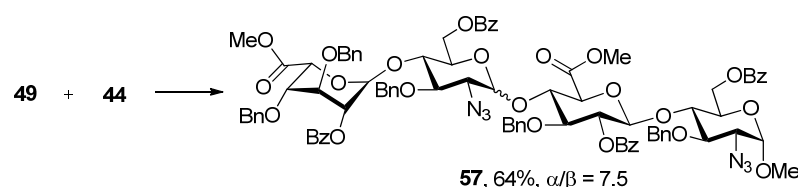

**57 $\alpha$**  (65.3 mg, 56.5%; a white solid):  $[\alpha]_{\text{D}}^{27} = +36.4$  ( $c$  2.1,  $\text{CHCl}_3$ );  $^1\text{H}$  NMR (400 MHz,  $\text{CDCl}_3$ )  $\delta$  8.06 (d,  $J = 7.3$  Hz, 6 H), 7.95 (d,  $J = 7.3$  Hz, 2 H), 7.65–7.02 (m, 37 H), 5.54 (d,  $J = 5.8$  Hz, 1 H), 5.40 (t,  $J = 8.4$  Hz, 2 H), 5.20 (t,  $J = 5.4$  Hz, 1 H), 5.07 (d,  $J = 10.6$  Hz, 1 H), 4.99 (d,  $J = 10.3$  Hz, 1 H), 4.83–4.34 (m, 16 H), 4.24 (t,  $J = 9.0$  Hz, 1 H), 4.17–4.03 (m, 1 H), 3.98–3.65 (m, 8 H), 3.52 (d,  $J = 10.0$  Hz, 1 H), 3.41–3.25 (m, 8 H), 3.19 (s, 3 H);  $^{13}\text{C}$  NMR (100 MHz,  $\text{CDCl}_3$ )  $\delta$  169.8, 167.8, 166.2, 166.1, 165.4, 164.8, 138.1, 138.0, 137.7, 137.3, 133.61, 133.55, 133.0, 130.1, 130.0, 129.9, 129.7, 129.6, 129.3, 129.0, 128.8, 128.7, 128.43, 128.36, 128.34, 128.30, 128.27, 128.0, 127.9, 127.8, 127.7, 101.3, 98.6, 98.0, 97.3, 82.5, 78.3, 78.2, 78.1, 75.9, 75.8, 75.4, 74.93, 74.88, 74.7, 73.7, 73.0, 72.0, 71.7, 69.8, 68.8, 63.2, 63.0, 62.5, 62.0, 55.5, 52.3, 51.7; ESI-MS  $m/z$  calcd for  $\text{C}_{90}\text{H}_{88}\text{N}_6\text{O}_{25}\text{Na}$   $[\text{M}+\text{Na}]^+$  1675.5691, found 1675.5659.

**57 $\beta$**  (8.7 mg, 7.5%; a white solid):  $[\alpha]_{\text{D}}^{27} = +32.9$  ( $c$  0.3,  $\text{CHCl}_3$ );  $^1\text{H}$  NMR (400 MHz,  $\text{CDCl}_3$ )  $\delta$  8.03–7.85 (m, 8 H), 7.61–6.75 (m, 37 H), 5.40 (d,  $J = 4.5$  Hz, 1 H), 5.27 (t,  $J = 8.4$  Hz, 1 H), 5.15 (d,  $J = 4.2$  Hz, 1 H), 5.08 (d,  $J = 10.5$  Hz, 1 H), 4.88 (d,  $J = 10.5$  Hz, 1 H), 4.81–4.60 (m, 7 H), 4.53 (d,  $J = 11.8$  Hz, 2 H), 4.49–4.19 (m, 7 H), 4.04 (brs, 1 H), 3.97–3.81 (m, 5 H), 3.72 (t,  $J = 8.6$  Hz, 2 H), 3.63 (s, 3 H), 3.46 (d,  $J = 11.3$  Hz, 1 H), 3.41–3.24 (m, 8 H);  $^{13}\text{C}$  NMR (125 MHz,  $\text{CDCl}_3$ )  $\delta$  169.8, 168.3, 166.0, 165.6, 164.9, 138.2, 138.1, 137.83, 137.75, 137.4, 133.4, 133.3, 132.9, 130.2, 123.0, 129.90, 129.85, 129.7, 129.33, 129.27, 128.64, 128.57, 128.52, 128.45, 128.4, 128.31, 128.30, 128.2, 128.1, 128.02, 127.98, 127.8, 127.71, 127.68, 127.3, 102.1,

101.5, 98.6, 98.1, 81.1, 79.49, 79.45, 78.3, 78.2, 77.4, 77.2, 76.9, 75.7, 75.5, 75.4, 75.3, 74.7, 74.61, 74.57, 73.5, 73.21, 73.15, 72.9, 70.9, 70.7, 68.9, 66.7, 63.2, 62.6, 62.5, 55.5, 52.9, 51.8; ESI-MS  $m/z$  calcd for  $C_{90}H_{88}N_6O_{25}Na$   $[M+Na]^+$  1675.5691, found 1675.5672.

#### Methyl (methyl

**2-*O*-benzoyl-3,4-*O*-dibenzyl- $\alpha$ -L-iduopyranosyluronate)-(1 $\rightarrow$ 4)-(2-azido-6-*O*-benzoyl-3-*O*-benzyl-2-deoxy- $\alpha/\beta$ -D-glucopyranosyl)-(1 $\rightarrow$ 4)-(methyl 2,3-*O*-dibenzyl- $\beta$ -D-glucopyranosyluronate)-(1 $\rightarrow$ 4)-2-azido-6-*O*-benzoyl-3-*O*-benzyl-2-deoxy- $\alpha$ -D-glucopyranoside (58)**

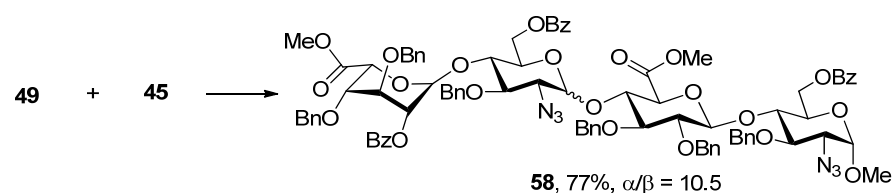

**58 $\alpha$**  (87.7 mg, 70.3%; a white solid):  $[\alpha]_D^{28} = +55.1$  ( $c$  0.2,  $CHCl_3$ );  $^1H$  NMR (400 MHz,  $CDCl_3$ )  $\delta$  8.13–8.02 (m, 4 H), 7.98 (d,  $J$  = 7.5 Hz, 2 H), 7.67–7.05 (m, 39 H), 5.54 (d,  $J$  = 5.6 Hz, 1 H), 5.46 (d,  $J$  = 3.2 Hz, 1 H), 5.19 (t,  $J$  = 5.2 Hz, 1 H), 5.04 (d,  $J$  = 10.2 Hz, 1 H), 5.01–4.90 (m, 2 H), 4.88–4.34 (m, 18 H), 4.10 (t,  $J$  = 9.3 Hz, 2 H), 4.01–3.61 (m, 8 H), 3.56–3.27 (m, 10 H), 3.21 (s, 3 H);  $^{13}C$  NMR (100 MHz,  $CDCl_3$ )  $\delta$  169.8, 168.6, 166.0, 165.9, 165.5, 138.6, 138.13, 138.08, 138.0, 137.8, 137.3, 133.43, 133.39, 132.9, 130.1, 130.0, 129.9, 129.8, 129.7, 129.3, 128.8, 128.7, 128.6, 128.5, 128.4, 128.3, 128.3, 128.2, 128.1, 128.03, 127.98, 127.9, 127.8, 127.7, 127.4, 127.3, 103.0, 102.0, 98.5, 98.0, 82.2, 82.0, 81.2, 79.5, 78.3, 77.9, 75.8, 75.7, 75.4, 75.3, 74.7, 74.5, 73.5, 73.3, 72.9, 70.8, 70.7, 69.1, 66.6, 63.0, 62.7, 62.4, 55.6, 52.8, 51.8; ESI-MS  $m/z$  calcd for  $C_{90}H_{90}N_6O_{24}Na$   $[M+Na]^+$  1661.5899, found 1661.5756.

**58 $\beta$**  (8.3 mg, 6.7%; a white solid):  $[\alpha]_D^{28} = +26.7$  ( $c$  0.7,  $CHCl_3$ );  $^1H$  NMR (400 MHz,  $CDCl_3$ )  $\delta$  8.03–7.89 (m, 6 H), 7.62–6.93 (m, 39 H), 5.40 (d,  $J$  = 4.7 Hz, 1 H), 5.14 (t,  $J$  = 4.5 Hz, 1 H), 5.05 (d,  $J$  = 10.1 Hz, 1 H), 4.94 (d,  $J$  = 11.5 Hz, 1 H), 4.88 (d,  $J$  = 10.6 Hz, 1 H), 4.79–4.55 (m, 10 H), 4.47–4.32 (m, 6 H), 4.17–4.02 (m, 3 H), 4.00–3.78 (m, 6 H), 3.74–3.66 (m, 4 H), 3.60 (t,  $J$  = 8.9 Hz, 1 H), 3.45–3.29 (m, 10 H);  $^{13}C$  NMR (100 MHz,  $CDCl_3$ )  $\delta$  169.8, 168.6, 166.0, 165.9, 165.5, 138.6, 138.1, 138.1, 138.0, 137.8, 137.3, 133.43, 133.39, 132.9, 130.1, 130.0, 129.9, 129.8, 129.7, 129.3, 128.8, 128.7, 128.6, 128.5, 128.4, 128.3, 128.3, 128.2, 128.1, 128.03, 127.98, 127.9, 127.8, 127.7, 127.4, 127.3, 103.0, 102.0, 98.5, 98.0, 82.2, 82.0, 81.2, 79.5, 78.3, 77.9, 75.8, 75.7, 75.4, 75.3, 74.7, 74.5, 73.5, 73.3, 72.9, 70.8, 70.7, 69.1, 66.6, 63.0, 62.7, 62.4, 55.6, 52.8, 51.8; ESI-MS  $m/z$  calcd for  $C_{90}H_{90}N_6O_{24}Na$   $[M+Na]^+$  1661.5899, found 1661.5889.

#### Methyl (methyl

**2-*O*-benzoyl-3,4-*O*-dibenzyl- $\alpha$ -L-iduopyranosyluronate)-(1 $\rightarrow$ 4)-(2-azido-6-*O*-benzoyl-3-*O*-benzyl-2-deoxy- $\alpha/\beta$ -D-glucopyranosyl)-(1 $\rightarrow$ 4)-(methyl**

**3-*O*-benzyl-2-*O*-benzoyl- $\alpha$ -L-iduopyranosyluronate)-(1 $\rightarrow$ 4)-2-azido-6-*O*-benzoyl-3-*O*-benzyl-2-deoxy- $\alpha$ -D-glucopyranoside (**59**)**

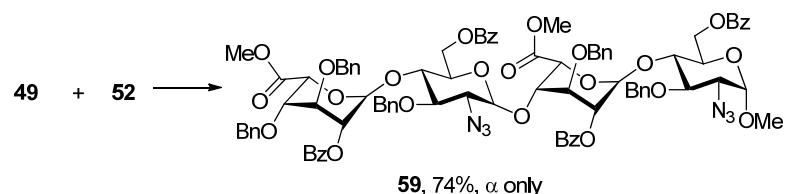

Compound **59** (69 mg, 74%,  $\alpha$  only; a white solid):  $[\alpha]_D^{27} = +20.0$  ( $c$  2.1,  $\text{CHCl}_3$ );  $^1\text{H}$  NMR (400 MHz,  $\text{CDCl}_3$ )  $\delta$  8.14–7.96 (m, 8 H), 7.63–7.05 (m, 37 H), 5.60–5.49 (m, 2 H), 5.22–5.12 (m, 2 H), 4.88 (d,  $J = 10.5$  Hz, 2 H), 4.81 (d,  $J = 3.5$  Hz, 2 H), 4.79–4.33 (m, 14 H), 4.19 (d,  $J = 10.2$  Hz, 2 H), 4.15–3.76 (m, 9 H), 3.51 (t,  $J = 9.6$  Hz, 2 H), 3.43 (dd,  $J = 10.2, 3.5$  Hz, 2 H), 3.41–3.25 (m, 9 H);  $^{13}\text{C}$  NMR (100 MHz,  $\text{CDCl}_3$ )  $\delta$  169.9, 169.3, 166.1, 165.5, 165.4, 137.9, 137.7, 137.5, 137.3, 133.6, 133.6, 133.2, 133.0, 130.1, 130.0, 129.91, 129.86, 129.32, 129.27, 128.8, 128.7, 128.43, 128.36, 128.3, 128.2, 128.04, 127.96, 127.7, 127.6, 98.5, 98.3, 98.2, 78.7, 78.4, 76.3, 75.9, 75.8, 75.2, 75.1, 74.6, 74.5, 73.71, 73.67, 73.0, 72.0, 71.7, 70.6, 70.2, 70.1, 69.3, 63.6, 63.2, 62.8, 61.9, 55.5, 51.9, 51.7; ESI-MS  $m/z$  calcd for  $\text{C}_{90}\text{H}_{88}\text{N}_6\text{O}_{25}\text{Na}$   $[\text{M}+\text{Na}]^+$  1675.5691, found 1675.5672.

**Methyl**

**(2-azido-6-*O*-benzoyl-3,4-*O*-dibenzyl-2-deoxy- $\alpha/\beta$ -D-glucopyranosyl)-(1 $\rightarrow$ 4)-(methyl**

**3-*O*-benzyl-2-*O*-benzoyl- $\beta$ -D-glucopyranosyluronate)-(1 $\rightarrow$ 4)-2-azido-6-*O*-benzoyl-3-*O*-benzyl-2-deoxy- $\alpha$ -D-glucopyranoside (**60**)**

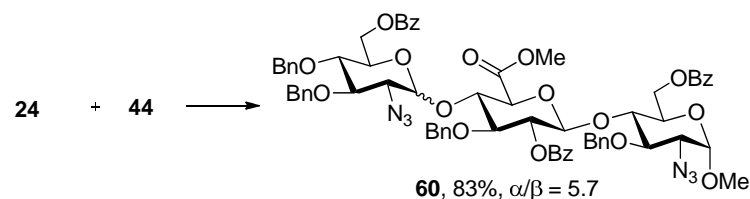

**60 $\alpha$**  (57.9 mg, 70.6%; a white solid):  $[\alpha]_D^{31} = +93.2$  ( $c$  1.1,  $\text{CHCl}_3$ );  $^1\text{H}$  NMR (400 MHz,  $\text{CDCl}_3$ )  $\delta$  8.08–7.82 (m, 6 H), 7.58–6.95 (m, 29 H), 5.46–5.27 (m, 2 H), 5.07 (d,  $J = 10.7$  Hz, 1 H), 4.86–4.70 (m, 5 H), 4.70–4.46 (m, 5 H), 4.48–4.32 (m, 4 H), 4.27 (t,  $J = 8.8$  Hz, 1 H), 4.00–3.73 (m, 5 H), 3.73–3.46 (m, 6 H), 3.41–3.16 (m, 5 H);  $^{13}\text{C}$  NMR (100 MHz,  $\text{CDCl}_3$ )  $\delta$  167.9, 166.2, 166.1, 164.9, 138.2, 137.54, 137.51, 137.4, 133.6, 133.5, 133.3, 129.9, 129.8, 129.7, 129.6, 129.0, 128.8, 128.7, 128.6, 128.51, 128.46, 128.4, 128.32, 128.28, 128.2, 128.1, 128.0, 127.8, 127.7, 101.3, 98.6, 97.8, 82.1, 80.3, 78.33, 75.8, 75.6, 75.3, 75.0, 74.8, 73.7, 70.0, 68.8, 63.6, 63.2, 62.7, 62.5, 55.5, 52.8; ESI-MS  $m/z$  calcd for  $\text{C}_{69}\text{H}_{68}\text{N}_6\text{O}_{18}\text{Na}$   $[\text{M}+\text{Na}]^+$  1291.4482, found 1291.4535.

**60 $\beta$**  (10.1 mg, 12.4%; a white solid):  $[\alpha]_D^{27} = +55.7$  ( $c$  0.6,  $\text{CHCl}_3$ );  $^1\text{H}$  NMR (400 MHz,  $\text{CDCl}_3$ )  $\delta$  8.12–7.79 (m, 6 H), 7.66–6.89 (m, 29 H), 5.40 (d,  $J = 4.6$  Hz, 1 H),

5.14 (t,  $J = 4.4$  Hz, 1 H), 5.05 (d,  $J = 10.2$  Hz, 1 H), 4.94 (d,  $J = 11.4$  Hz, 1 H), 4.89 (d,  $J = 10.5$  Hz, 1 H), 4.81–4.52 (m, 11 H), 4.50–4.29 (m, 5 H), 4.10 (dt,  $J = 25.3, 9.1$  Hz, 2 H), 4.02–3.76 (m, 6 H), 3.76–3.65 (m, 4 H), 3.60 (t,  $J = 8.9$  Hz, 1 H), 3.52–3.23 (m, 10 H);  $^{13}\text{C}$  NMR (100 MHz,  $\text{CDCl}_3$ )  $\delta$  168.3, 166.1, 164.9, 138.2, 137.8, 137.7, 137.4, 133.5, 133.3, 133.2, 129.9, 129.74, 129.68, 129.2, 128.69, 128.65, 128.6, 128.5, 128.4, 128.3, 128.2, 128.1, 128.0, 127.72, 127.69, 127.4, 102.2, 101.4, 98.5, 83.2, 79.5, 78.3, 78.2, 77.4, 75.9, 75.7, 75.2, 74.8, 74.6, 73.3, 73.1, 68.9, 66.9, 63.2, 63.1, 62.5, 55.5, 52.9; ESI-MS  $m/z$  calcd for  $\text{C}_{69}\text{H}_{68}\text{N}_6\text{O}_{18}\text{Na}$   $[\text{M}+\text{Na}]^+$  1291.4482, found 1291.4524.

### Methyl

(2-azido-6-*O*-benzoyl-3,4-*O*-dibenzyl-2-deoxy- $\alpha$ -D-glucopyranosyl)-(1 $\rightarrow$ 4)-(methyl 2,3-*O*-dibenzyl- $\beta$ -D-glucopyranosyluronate)-(1 $\rightarrow$ 4)-2-azido-6-*O*-benzoyl-3-*O*-benzyl-2-deoxy- $\alpha$ -D-glucopyranoside (**61**)

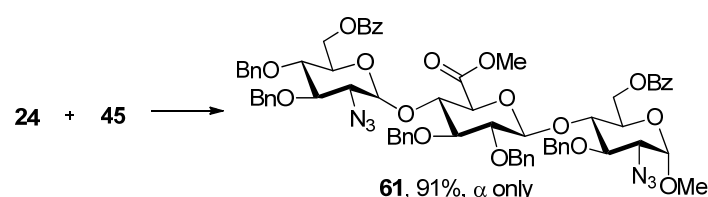

Compound **61** (72 mg, 91% yield,  $\alpha$  only; a white solid):  $[\alpha]_{\text{D}}^{31} = +77.9$  ( $c$  1.2,  $\text{CHCl}_3$ );  $^1\text{H}$  NMR (400 MHz,  $\text{CDCl}_3$ )  $\delta$  7.93 (m, 4 H), 7.56–7.03 (m, 31 H), 5.41 (d,  $J = 3.3$  Hz, 1 H), 5.01 (d,  $J = 10.5$  Hz, 1 H), 4.91 (d,  $J = 10.5$  Hz, 1 H), 4.85–4.71 (m, 5 H), 4.52 (m, 9 H), 4.10 (t,  $J = 8.5$  Hz, 1 H), 3.91 (t,  $J = 9.3$  Hz, 1 H), 3.84–3.56 (m, 8 H), 3.53 (s, 3 H), 3.45 (t,  $J = 8.3$  Hz, 1 H), 3.40–3.17 (m, 5 H);  $^{13}\text{C}$  NMR (100 MHz,  $\text{CDCl}_3$ )  $\delta$  168.2, 166.2, 165.9, 138.3, 138.0, 137.9, 137.6, 133.5, 133.2, 129.9, 129.8, 129.7, 128.74, 128.69, 128.65, 128.59, 128.51, 128.47, 128.4, 128.30, 128.23, 128.17, 128.1, 128.0, 127.94, 127.89, 127.8, 127.6, 127.4, 127.3, 103.0, 98.5, 97.8, 83.9, 82.6, 80.3, 78.3, 78.0, 77.8, 77.4, 75.9, 75.8, 75.8, 75.6, 75.4, 75.2, 74.8, 69.9, 69.1, 63.6, 63.0, 62.7, 62.4, 55.6, 52.8; ESI-MS  $m/z$  calcd for  $\text{C}_{69}\text{H}_{70}\text{N}_6\text{O}_{17}\text{Na}$   $[\text{M}+\text{Na}]^+$  1277.4690, found 1277.4634.

### Methyl

(2-azido-6-*O*-benzoyl-3,4-*O*-dibenzyl-2-deoxy- $\alpha/\beta$ -D-glucopyranosyl)-(1 $\rightarrow$ 4)-(methyl 3-*O*-benzyl-2-*O*-benzoyl- $\alpha$ -L-iduopyranosyluronate)-(1 $\rightarrow$ 4)-2-azido-6-*O*-benzoyl-3-*O*-benzyl-2-deoxy- $\alpha$ -D-glucopyranoside (**62**)

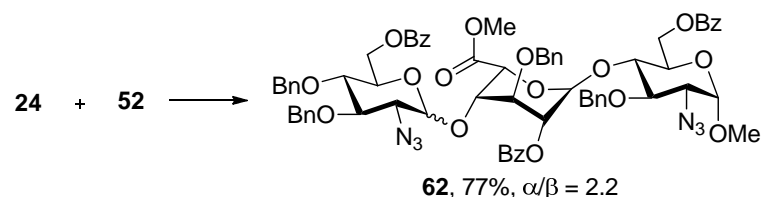

**62 $\alpha$**  (37.8 mg, 52.9%; a white solid):  $[\alpha]_{\text{D}}^{25} = +25.0$  ( $c$  2.9,  $\text{CHCl}_3$ );  $^1\text{H}$  NMR (400

MHz, CDCl<sub>3</sub>)  $\delta$  8.19–7.99 (m, 6 H), 7.66–7.54 (m, 2 H), 7.54–7.19 (m, 27 H), 5.63 (d,  $J$  = 2.6 Hz, 1 H), 5.26 (s, 1 H), 5.03 (d,  $J$  = 10.4 Hz, 1 H), 4.99–4.78 (m, 7 H), 4.73 (d,  $J$  = 11.9 Hz, 1 H), 4.65 (d,  $J$  = 10.8 Hz, 2 H), 4.55 (dd,  $J$  = 12.1, 4.2 Hz, 1 H), 4.52–4.44 (m, 1 H), 4.32 (d,  $J$  = 10.5 Hz, 1 H), 4.26–4.07 (m, 6 H), 4.06–3.92 (m, 2 H), 3.74–3.63 (m, 2 H), 3.60 (s, 3 H), 3.53 (dd,  $J$  = 10.1, 3.7 Hz, 1 H), 3.49 (s, 3 H), 3.31 (dd,  $J$  = 9.7, 3.3 Hz, 1 H); <sup>13</sup>C NMR (100 MHz, CDCl<sub>3</sub>)  $\delta$  169.3, 166.2, 166.1, 165.5, 138.0, 137.8, 137.6, 137.4, 133.4, 133.2, 130.1, 130.0, 129.9, 129.8, 129.7, 129.4, 128.9, 128.6, 128.5, 128.4, 128.3, 128.2, 128.1, 128.0, 127.7, 99.2, 98.61, 98.60, 80.2, 78.9, 77.7, 75.8, 75.2, 75.1, 74.4, 73.3, 70.3, 69.6, 69.3, 69.2, 63.8, 63.0, 62.6, 60.5, 55.5, 52.2; ESI-MS  $m/z$  calcd for C<sub>69</sub>H<sub>68</sub>N<sub>6</sub>O<sub>18</sub>Na [M+Na]<sup>+</sup> 1291.4482, found 1291.4463.

**62 $\beta$**  (17.2 mg, 24.1%; a white solid):  $[\alpha]_D^{27}$  = +1.3 ( $c$  1.4, CHCl<sub>3</sub>); <sup>1</sup>H NMR (400 MHz, CDCl<sub>3</sub>)  $\delta$  8.08–7.83 (m, 6 H), 7.60–7.13 (m, 31 H), 5.38 (s, 1 H), 5.11 (s, 1 H), 4.96 (d,  $J$  = 2.3 Hz, 1 H), 4.90–4.63 (m, 8 H), 4.47 (m, 4 H), 4.26 (d,  $J$  = 8.0 Hz, 1 H), 4.21 (brs, 1 H), 4.08–3.94 (m, 4 H), 3.91–3.82 (m, 1 H), 3.60 (s, 3 H), 3.56–3.33 (m, 6 H), 3.28–3.11 (m, 2 H); <sup>13</sup>C NMR (100 MHz, CDCl<sub>3</sub>)  $\delta$  169.3, 166.2, 166.1, 165.3, 137.9, 137.7, 137.7, 137.4, 133.3, 133.2, 133.1, 130.1, 129.92, 129.88, 129.73, 129.71, 129.6, 128.7, 128.50, 128.46, 128.4, 128.34, 128.28, 128.21, 128.17, 128.15, 128.06, 127.8, 127.5, 103.5, 98.5, 98.1, 83.2, 78.9, 75.8, 75.8, 75.3, 75.2, 74.8, 74.1, 73.3, 72.6, 69.5, 68.2, 67.5, 66.9, 63.9, 63.0, 55.5, 52.1; ESI-MS  $m/z$  calcd for C<sub>69</sub>H<sub>68</sub>N<sub>6</sub>O<sub>18</sub>Na [M+Na]<sup>+</sup> 1291.4482, found 1291.4457.

## Methyl

**(2-azido-6-*O*-benzoyl-3,4-*O*-dibenzyl-2-deoxy- $\alpha/\beta$ -D-glucopyranosyl)-(1 $\rightarrow$ 4)-4-Methoxyphenyl (methyl 3-*O*-benzyl-2-*O*-benzoyl- $\beta$ -D-glucopyranosyluronate) (**64**)**

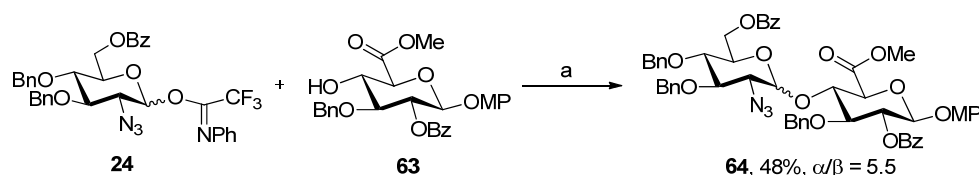

Compound **63** was prepared following a similar procedure as that for the preparation of **44**:  $[\alpha]_D^{27}$  = +8.2 ( $c$  0.8, CHCl<sub>3</sub>); <sup>1</sup>H NMR (400 MHz, CDCl<sub>3</sub>)  $\delta$  8.04–7.97 (m, 2 H), 7.59 (t,  $J$  = 7.4 Hz, 1 H), 7.45 (t,  $J$  = 7.7 Hz, 2 H), 7.24–7.11 (m, 5 H), 6.94–6.86 (m, 2 H), 6.80–6.70 (m, 2 H), 5.48 (dd,  $J$  = 9.3, 7.7 Hz, 1 H), 5.02 (d,  $J$  = 7.7 Hz, 1 H), 4.86–4.73 (m, 2 H), 4.17 (td,  $J$  = 9.4, 2.7 Hz, 1 H), 4.02 (d,  $J$  = 9.7 Hz, 1 H), 3.83 (s, 3 H), 3.78 (t,  $J$  = 9.1 Hz, 1 H), 3.73 (s, 3 H), 3.12 (d,  $J$  = 2.7 Hz, 1 H); <sup>13</sup>C NMR (100 MHz, CDCl<sub>3</sub>)  $\delta$  169.6, 165.3, 155.9, 151.4, 137.9, 133.4, 123.0, 128.6, 128.5, 128.2, 127.9, 119.0, 114.4, 101.4, 80.8, 74.6, 74.4, 73.1, 72.0, 55.7, 53.0; ESI-MS  $m/z$  calcd for C<sub>28</sub>H<sub>28</sub>O<sub>9</sub>Na [M+Na]<sup>+</sup> 531.1626, found 531.1616.

**64a** (37.2 mg, 40.6%; a white solid):  $[\alpha]_D^{26}$  = +48.9 ( $c$  1.2, CHCl<sub>3</sub>); <sup>1</sup>H NMR (400 MHz, CDCl<sub>3</sub>)  $\delta$  8.10–7.95 (m, 4 H), 7.62–7.51 (m, 2 H), 7.48–7.13 (m, 21 H),

6.95–6.85 (m, 2 H), 6.81–6.70 (m, 2 H), 5.54 (dd,  $J = 8.0, 6.5$  Hz, 1 H), 5.50 (d,  $J = 3.7$  Hz, 1 H), 5.17 (d,  $J = 6.4$  Hz, 1 H), 4.90–4.80 (m, 4 H), 4.76 (d,  $J = 10.7$  Hz, 1 H), 4.64–4.44 (m, 4 H), 4.24 (d,  $J = 8.7$  Hz, 1 H), 4.08 (t,  $J = 8.3$  Hz, 1 H), 4.01–3.90 (m, 1 H), 3.85 (d,  $J = 9.9$  Hz, 1 H), 3.74 (s, 3 H), 3.72–3.60 (m, 4 H), 3.38 (dd,  $J = 10.3, 3.7$  Hz, 1 H);  $^{13}\text{C}$  NMR (100 MHz,  $\text{CDCl}_3$ )  $\delta$  168.5, 166.3, 165.2, 155.8, 151.1, 137.7, 137.6, 137.5, 133.5, 133.3, 129.9, 129.8, 129.6, 128.7, 128.6, 128.5, 128.3, 128.2, 128.1, 127.9, 127.8, 118.7, 114.7, 100.7, 98.1, 81.6, 80.3, 78.1, 75.8, 75.4, 75.0, 74.7, 74.3, 73.8, 70.2, 63.7, 62.9, 55.8, 52.9; ESI-MS  $m/z$  calcd for  $\text{C}_{55}\text{H}_{53}\text{N}_3\text{O}_{14}\text{Na}$   $[\text{M}+\text{Na}]^+$  1002.3420, found 1002.3419.

## Methyl

**(2-azido-6-*O*-benzoyl-3,4-*O*-dibenzyl-2-deoxy- $\alpha$ -D-glucopyranosyl)-(1 $\rightarrow$ 4)-4-methoxyphenyl (methyl 3-*O*-benzyl-2-*O*-benzoyl- $\alpha$ -L-iduropyranosyluronate) (66)**

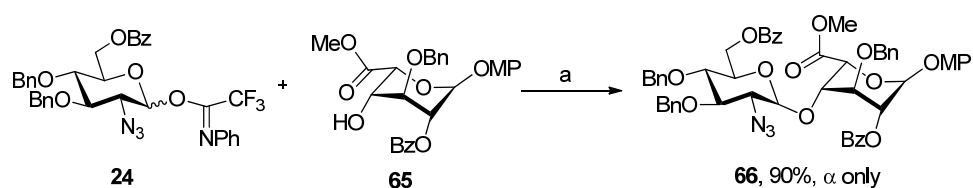

Compound **65** was prepared following a similar procedure as that for the preparation of **44**:  $[\alpha]_{\text{D}}^{29} = -55.5$  ( $c$  1.3,  $\text{CHCl}_3$ );  $^1\text{H}$  NMR (400 MHz,  $\text{CDCl}_3$ )  $\delta$  8.01 (d,  $J = 7.3$  Hz, 2 H), 7.60 (t,  $J = 7.5$  Hz, 1 H), 7.50–7.23 (m, 7 H), 7.06 (d,  $J = 9.1$  Hz, 2 H), 6.83 (d,  $J = 9.1$  Hz, 2 H), 5.70 (s, 1 H), 5.43 (s, 1 H), 5.07 (d,  $J = 1.2$  Hz, 1 H), 4.94 (d,  $J = 11.7$  Hz, 1 H), 4.74 (d,  $J = 11.7$  Hz, 1 H), 4.18 (d,  $J = 11.3$  Hz, 1 H), 3.98 (s, 1 H), 3.78 (d,  $J = 13.5$  Hz, 6 H), 2.82 (d,  $J = 11.4$  Hz, 1 H);  $^{13}\text{C}$  NMR (100 MHz,  $\text{CDCl}_3$ )  $\delta$  169.7, 165.1, 155.4, 150.5, 137.6, 134.0, 129.9, 129.0, 128.8, 128.6, 128.1, 127.8, 118.0, 114.8, 97.7, 74.5, 72.1, 68.5, 68.3, 67.4, 55.8, 52.5; ESI-MS  $m/z$  calcd for  $\text{C}_{28}\text{H}_{28}\text{O}_9\text{Na}$   $[\text{M}+\text{Na}]^+$  531.1626, found 531.1616.

Compound **66** (56 mg, 90%,  $\alpha$  only; a white solid):  $[\alpha]_{\text{D}}^{27} = +1.0$  ( $c$  0.3,  $\text{CHCl}_3$ );  $^1\text{H}$  NMR (400 MHz,  $\text{CDCl}_3$ )  $\delta$  8.39–8.13 (m, 2 H), 8.13–7.93 (m, 2 H), 7.71–7.03 (m, 25 H), 6.89 (d,  $J = 9.1$  Hz, 2 H), 5.82 (s, 1 H), 5.42 (s, 1 H), 5.07 (d,  $J = 11.2$  Hz, 2 H), 4.94–4.84 (m, 2 H), 4.82 (d,  $J = 10.8$  Hz, 1 H), 4.74 (d,  $J = 12.3$  Hz, 1 H), 4.66 (d,  $J = 10.8$  Hz, 1 H), 4.56 (dd,  $J = 12.3, 2.5$  Hz, 1 H), 4.32 (s, 1 H), 4.28–4.07 (m, 4 H), 3.83 (d,  $J = 5.1$  Hz, 6 H), 3.68 (d,  $J = 9.8$  Hz, 2 H), 3.39–3.21 (m, 1 H);  $^{13}\text{C}$  NMR (100 MHz,  $\text{CDCl}_3$ )  $\delta$  169.4, 166.2, 165.6, 155.4, 150.7, 137.8, 137.7, 133.5, 133.2, 130.1, 129.7, 129.6, 128.9, 128.6, 128.1, 128.0, 118.2, 114.8, 99.7, 98.5, 80.4, 77.8, 76.1, 75.2, 75.1, 73.2, 72.5, 70.5, 68.1, 64.0, 62.8, 55.78, 52.5; ESI-MS  $m/z$  calcd for  $\text{C}_{55}\text{H}_{53}\text{N}_3\text{O}_{14}\text{Na}$   $[\text{M}+\text{Na}]^+$ , 1002.3420, found 1002.3422.

**General Procedure for the Saponification of the Esters.** A premixed solution of 30% solution of  $\text{H}_2\text{O}_2$  in water (100 equiv per  $\text{CO}_2\text{Me}$ ) and 1 M LiOH (50 equiv per  $\text{CO}_2\text{Me}$ ) were added to a solution of the starting material in THF (0.02 M). The reaction mixture was stirred at room temperature for 24 h. MeOH (0.02 M) and 3 M

KOH was added until pH = 14. The reaction mixture was left stirring for 24 h at room temperature. The mixture was then brought to pH = 8~8.5 by addition of acidic resins. The mixture was filtered, and the filtrate was concentrated in vacuo. The residue was dissolved with CH<sub>2</sub>Cl<sub>2</sub>/MeOH (v/v = 1/1). The resulting solution was layered on the top of a Sephadex LH-20 chromatography column that was eluted with CH<sub>2</sub>Cl<sub>2</sub>/MeOH (v/v = 1/1). The appropriate fractions were concentrated in vacuo to provide the pure product.

**General Procedure for the Oxidative Cleavage of the *p*-Methoxybenzyl Group.**

Compound was dissolved in CH<sub>2</sub>Cl<sub>2</sub> and Buffer H<sub>2</sub>O (0.3 M, v/v = 10: 1). DDQ (2.0 equiv per PMB) was added at room temperature. Stirring was continued until TLC indicated disappearance of the raw material. The solution was quenched with saturated sodium thiosulfate. The organic layers were washed with water, saturated sodium bicarbonate, and brine, and then were dried over Na<sub>2</sub>SO<sub>4</sub> and filtered. The filtrate was concentrated in vacuo. The residue was purified by silica gel column chromatography using a gradient of petroleum ether and EtOAc to give the pure product.

**General Procedure for the *O*-Sulfation.** Sulfur trioxide pyridine complex (5 equiv per OH) was added to a solution of the starting material in DMF (1.0 mL for 0.05 mmol). The mixture was stirred at ambient temperature for 4 h until TLC (RP-18 silica gel, H<sub>2</sub>O/CH<sub>3</sub>OH, v/v = 1/2) indicated completion of the reaction. After the addition of CH<sub>3</sub>OH (0.5 mL) stirring was continued for 15 min. The mixture was concentrated in vacuo. The residue was applied to a small RP-18 silica gel column, which was eluted with a stepwise gradient of H<sub>2</sub>O and CH<sub>3</sub>OH (from v/v = 1/0 to 2/1). The fractions containing the product were concentrated in vacuo. The residue was immediately passed through a column of Dowex 50WX4 Na<sup>+</sup> resin using CH<sub>3</sub>OH as eluent. The fractions containing the product were concentrated in vacuo to provide the product as sodium salt.

**General Procedure for the Reduction of the Azide Group.** A 1 M solution of PMe<sub>3</sub> in THF (4 equiv per azide group) was added to the solution of the starting material in THF (1.0 mL for 0.04 mmol). A 0.1 M NaOH solution (5 equiv per azido group) was added, and the mixture was stirred at room temperature for 5 h. The progress of the reaction was monitored by TLC (RP-18 silica gel, H<sub>2</sub>O/CH<sub>3</sub>OH, v/v = 1/2). The pH was then adjusted to 7~8 by careful addition of 1.0 M HCl. The mixture was then concentrated in vacuo.

**General Procedure for the Selective *N*-Acetylation.** Acetic anhydride (10 equiv per NH<sub>2</sub>) was added to a solution of the starting material in a mixture of anhydrous CH<sub>3</sub>OH (0.02 mmol) and Et<sub>3</sub>N (20 equiv per NH<sub>2</sub>) at 0 °C. The progress of the reaction was monitored by TLC (RP-18 silica gel, H<sub>2</sub>O/CH<sub>3</sub>OH, v/v = 1/1). After stirring for 4 h at room temperature, the mixture was concentrated in vacuo. The

residue was vortexed with water and applied to a small RP-18 silica gel column, which was eluted with a stepwise gradient of H<sub>2</sub>O and CH<sub>3</sub>OH (from v/v = 1/0 to 1/1). The fractions containing product were concentrated in vacuo, and the residue was immediately passed through a column of Dowex 50WX4 Na<sup>+</sup> resin using a mixture of CH<sub>3</sub>OH and H<sub>2</sub>O (v/v = 9/1) as eluent. The fractions containing product were concentrated in vacuo to provide the *N*-acetylated product as sodium salt.

**General Procedure for the Selective *N*-Sulfation.** Sulfur trioxide pyridine complex (5 equiv per NH<sub>2</sub>) was added to the starting material in CH<sub>3</sub>OH (1 mL for 0.01 mmol) in a mixture of triethylamine (0.3 mL) and 0.1 M NaOH (2 equiv per NH<sub>2</sub>) at 0 °C. The progress of the reaction was monitored by TLC (RP-18 silica gel, H<sub>2</sub>O/CH<sub>3</sub>OH, v/v = 1/1). Two additional portions of sulfur trioxide pyridine complex were added at 0 °C after 30 min and 1 h, respectively. After stirring for an additional 8 h at 0 °C, the mixture was concentrated in vacuo. The residue was vortexed with water and applied to a small RP-18 silica gel column, which was eluted with a stepwise gradient of H<sub>2</sub>O and CH<sub>3</sub>OH (from 1/0 to 1/1, v/v). The fractions containing product were concentrated in vacuo, and the residue was immediately passed through a column of Dowex 50WX4 Na<sup>+</sup> resin using a mixture of CH<sub>3</sub>OH and H<sub>2</sub>O (v/v = 9/1) as eluent. The fractions containing product were concentrated in vacuo to provide the *N*-sulfated product.

**General Procedure for the Final Debenzylation.** Palladium hydroxide on carbon (Degussa type, 20%, 1.0-2.0 times the weight of the starting material) was added to a solution of the starting material in CH<sub>3</sub>OH and pH =7 buffer H<sub>2</sub>O (v/v = 1/1, 1 mL for 10~20 mg). The mixture was placed under an atmosphere of hydrogen for 24 h. The mixture was filtered, and the residue was diluted with H<sub>2</sub>O. The solution was layered on the top of a Sephadex G-10 chromatography column that was eluted with H<sub>2</sub>O. The fractions containing product were concentrated in vacuo, and the residue was immediately passed through a column of Dowex 50WX4 Na<sup>+</sup> resin using H<sub>2</sub>O as eluent. The appropriate fractions were freeze dried to provide the final product as a white solid.

### Methyl

**(3,4-*O*-benzyl- $\beta$ -D-glucopyranosyluronate)-(1 $\rightarrow$ 4)-(2-azido-3-*O*-benzyl-2-deoxy- $\alpha$ -D-glucopyranosyl)-(1 $\rightarrow$ 4)-(3-*O*-benzyl- $\beta$ -D-glucopyranosyluronate)-(1 $\rightarrow$ 4)-2-azido-3-*O*-benzyl-2-deoxy- $\alpha$ -D-glucopyranoside (67)**

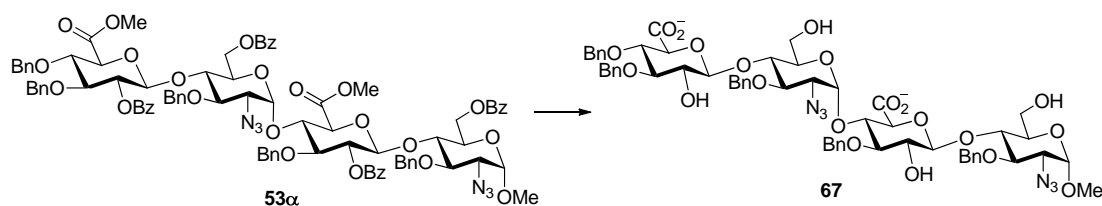

The general procedures for saponification was applied to provide **67** (85 mg, 96%) as a white solid:  $[\alpha]_D^{24} = 46.2$  ( $c$  1.0,  $\text{CHCl}_3$ );  $^1\text{H}$  NMR (400 MHz,  $\text{CD}_3\text{OD}$ )  $\delta$  7.47–7.21 (m, 25 H), 5.52 (d,  $J = 2.8$  Hz, 1 H), 5.13–5.07 (m, 3 H), 4.91–4.63 (m, 10 H), 4.06–3.48 (m, 18 H), 3.31 (s, 3 H), 3.20 (dd,  $J = 9.6, 2.8$  Hz, 1 H), 3.10–3.08 (m, 1 H);  $^{13}\text{C}$  NMR (100 MHz,  $\text{CD}_3\text{OD}$ )  $\delta$  140.2, 140.1, 139.8, 139.7, 139.6, 130.0, 130.0, 129.39, 129.36, 129.3, 129.1, 129.04, 129.01, 128.8, 128.73, 128.71, 128.67, 128.6, 104.7, 104.6, 100.1, 99.2, 86.1, 85.5, 81.0, 79.6, 79.2, 78.7, 77.9, 76.7, 76.40, 76.36, 76.1, 76.0, 73.1, 72.8, 64.3, 64.2, 61.1, 60.6, 55.6; ESI-MS  $m/z$  calcd for  $\text{C}_{60}\text{H}_{68}\text{N}_6\text{O}_{21}\text{Na}$   $[\text{M}+\text{Na}]^+$  1231.4330, found 1231.4300.

### Methyl

**(3,4-*O*-benzyl-2-*O*-sulfo- $\beta$ -D-glucopyranosyluronate)-(1 $\rightarrow$ 4)-(2-azido-3-*O*-benzyl-6-*O*-sulfo-2-deoxy- $\alpha$ -D-glucopyranosyl)-(1 $\rightarrow$ 4)-(3-*O*-benzyl-2-*O*-sulfo- $\beta$ -D-glucopyranosyluronate)-(1 $\rightarrow$ 4)-2-azido-3-*O*-benzyl-6-*O*-sulfo-2-deoxy- $\alpha$ -D-glucopyranoside (**68**)**

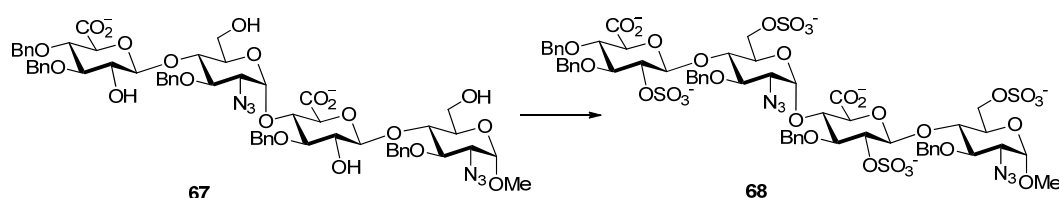

The general procedure for *O*-sulfation was applied to provide **68** (107 mg, 99%) as a white solid:  $[\alpha]_D^{27} = 24.8$  ( $c$  0.2, MeOH);  $^1\text{H}$  NMR (400 MHz,  $\text{CD}_3\text{OD}$ )  $\delta$  7.55–7.23 (m, 25 H), 5.49 (d,  $J = 3.6$  Hz, 1 H), 5.37 (d,  $J = 9.6$  Hz, 1 H), 5.27–5.18 (m, 3 H), 5.07–5.02 (m, 2 H), 4.79–4.67 (m, 9 H), 4.50 (m, 2 H), 4.32–4.23 (m, 2 H), 4.07–3.87 (m, 12 H), 3.41 (s, 3 H), 3.26–3.20 (m, 2 H); ESI-MS  $m/z$  calcd for  $\text{C}_{60}\text{H}_{65}\text{N}_6\text{O}_{33}\text{S}_4$   $[\text{M}-3\text{H}]^{3-}$  508.4, found 509.1.

### Methyl

**(3,4-*O*-benzyl-2-*O*-sulfo- $\beta$ -D-glucopyranosyluronate)-(1 $\rightarrow$ 4)-(2-*N*-acetyl-3-*O*-benzyl-6-*O*-sulfo-2-deoxy- $\alpha$ -D-glucopyranosyl)-(1 $\rightarrow$ 4)-(3-*O*-benzyl-2-*O*-sulfo- $\beta$ -D-glucopyranosyluronate)-(1 $\rightarrow$ 4)-2-*N*-acetyl-3-*O*-benzyl-6-*O*-sulfo-2-deoxy- $\alpha$ -D-glucopyranoside (**69**)**

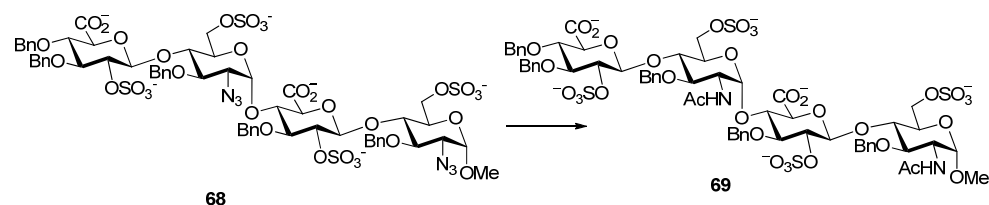

The general procedures for reduction of the azide group and selective *N*-acetylation were applied to provide **69** (53 mg, 91%) as a white solid:  $[\alpha]_D^{29} = +8.0$  ( $c$  0.1, MeOH);  $^1\text{H}$  NMR (400 MHz,  $\text{CD}_3\text{OD}$ )  $\delta$  7.53–7.12 (m, 25 H), 5.34 (d,  $J = 3.2$  Hz, 1 H), 5.14

(m, 6 H), 4.78–4.38 (m, 12 H), 4.36–4.13 (m, 5 H), 4.13–3.95 (m, 7 H), 3.95–3.75 (m, 4 H), 3.37 (s, 3 H), 1.91 (s, 3 H), 1.88 (s, 3 H);  $^{13}\text{C}$  NMR (100 MHz,  $\text{CD}_3\text{OD}$ )  $\delta$  173.5, 140.5, 140.2, 140.0, 139.5, 129.8, 129.7, 129.5, 129.3, 129.2, 129.0, 128.9, 128.5, 128.4, 128.31, 128.27, 102.1, 101.6, 99.8, 97.8, 83.9, 82.9, 81.4, 80.0, 79.9, 77.7, 77.3, 76.1, 75.8, 75.4, 75.3, 74.8, 71.3, 70.6, 67.0, 55.6, 53.7, 53.2, 23.0, 22.7; ESI-MS  $m/z$  calcd for  $\text{C}_{64}\text{H}_{73}\text{N}_2\text{O}_{35}\text{S}_4$   $[\text{M}-3\text{H}]^{3-}$  519.1, found 519.6.

### Methyl

**(3,4-*O*-benzyl-2-*O*-sulfo- $\beta$ -D-glucopyranosyluronate)-(1 $\rightarrow$ 4)-(2-*N*-sulfo-3-*O*-benzyl-6-*O*-sulfo-2-deoxy- $\alpha$ -D-glucopyranosyl)-(1 $\rightarrow$ 4)-(3-*O*-benzyl-2-*O*-sulfo- $\beta$ -D-glucopyranosyluronate)-(1 $\rightarrow$ 4)-2-*N*-sulfo-3-*O*-benzyl-6-*O*-sulfo-2-deoxy- $\alpha$ -D-glucopyranoside (**70**)**

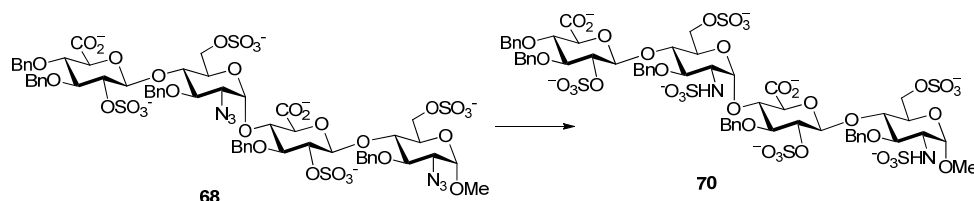

The general procedures for reduction of the azide and selective *N*-sulfation were applied to provide **70** (48 mg, 86%) as a white solid:  $[\alpha]_{\text{D}}^{27} = 9.3$  ( $c$  0.4, MeOH);  $^1\text{H}$  NMR (400 MHz,  $\text{CD}_3\text{OD}$ )  $\delta$  7.63–7.14 (m, 25 H), 5.35 (s, 1 H), 5.14–4.98 (m, 5 H), 4.94–4.83 (m, 3 H), 4.72–4.59 (m, 7 H), 4.51–4.47 (m, 2 H), 4.31–4.19 (m, 5 H), 4.09–3.95 (m, 6 H), 3.89–3.74 (m, 3 H), 3.67–3.66 (m, 1 H), 3.50–3.41 (m, 4 H);  $^{13}\text{C}$  NMR (100 MHz,  $\text{CD}_3\text{OD}$ )  $\delta$  175.3, 139.9, 139.8, 139.63, 139.58, 139.0, 130.4, 130.0, 129.7, 129.6, 129.3, 129.12, 129.08, 129.0, 128.9, 128.7, 128.4, 128.3, 101.7, 101.5, 100.2, 97.9, 82.9, 81.2, 81.1, 81.0, 79.0, 78.2, 75.9, 75.6, 74.9, 74.5, 74.2, 70.8, 67.2, 58.4, 55.8; ESI-MS  $m/z$  calcd for  $\text{C}_{60}\text{H}_{69}\text{N}_2\text{O}_{39}\text{S}_6$   $[\text{M}-3\text{H}]^{3-}$  544.4, found 544.8.

### Methyl

**(2-*O*-sulfo- $\beta$ -D-glucopyranosyluronate)-(1 $\rightarrow$ 4)-(2-*N*-acetyl-6-*O*-sulfo-2-deoxy- $\alpha$ -D-glucopyranosyl)-(1 $\rightarrow$ 4)-(2-*O*-sulfo- $\beta$ -D-glucopyranosyluronate)-(1 $\rightarrow$ 4)-2-*N*-acetyl-6-*O*-sulfo-2-deoxy- $\alpha$ -D-glucopyranoside (**1**)**

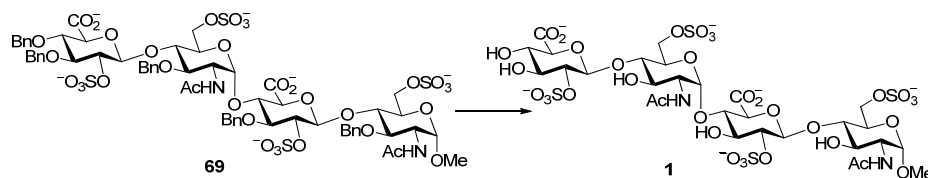

The general procedure for global debenzylation was applied to provide **1** (41 mg, 99%) as a white solid:  $[\alpha]_{\text{D}}^{28} = +39.0$  ( $c$  0.2,  $\text{H}_2\text{O}$ );  $^1\text{H}$  NMR (400 MHz,  $\text{D}_2\text{O}$ )  $\delta$  5.35 (d,  $J = 3.5$  Hz, 1 H), 4.58 (t,  $J = 9.2$  Hz, 2 H), 4.36–3.66 (m, 15 H), 3.60 (t,  $J = 9.5$  Hz, 1 H), 3.39 (s, 2 H), 2.05 (d,  $J = 7.1$  Hz, 6 H);  $^{13}\text{C}$  NMR (100 MHz,  $\text{D}_2\text{O}$ )  $\delta$  175.4, 174.5, 174.3, 99.7, 97.8, 97.4, 80.1, 79.5, 77.9, 77.6, 77.5, 76.3, 75.6, 74.9, 74.3, 71.6, 69.1,

68.9, 68.8, 68.1, 65.7, 55.2, 53.2, 53.0, 21.9, 21.8; ESI-MS  $m/z$  calcd for  $C_{29}H_{43}N_2O_{35}S_4$   $[M-3H]^{3-}$  369.0, found 369.3;  $m/z$  calcd for  $C_{29}H_{44}N_2O_{35}S_4$   $[M-2H]^{2-}$  554.0, found 554.1.

### Methyl

**(2-*O*-sulfo- $\beta$ -D-glucopyranosyluronate)-(1 $\rightarrow$ 4)-(2-*N*-sulfo-6-*O*-sulfo-2-deoxy- $\alpha$ -D-glucopyranosyl)-(1 $\rightarrow$ 4)-(2-*O*-sulfo- $\beta$ -D-glucopyranosyluronate)-(1 $\rightarrow$ 4)-2-*N*-sulfo-6-*O*-sulfo-2-deoxy- $\alpha$ -D-glucopyranoside (2)**

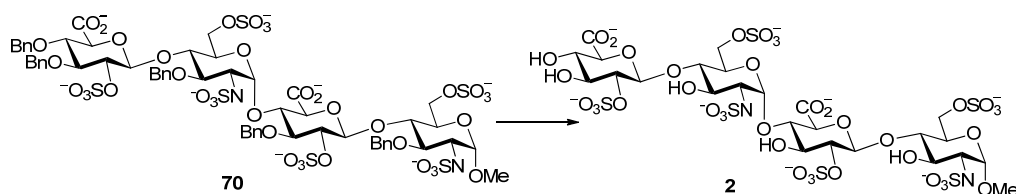

The general procedure for global debenzylation was applied to provide compound **2** (35 mg, 99%) as a white solid:  $[\alpha]_D^{28} = +12.3$  ( $c$  0.6,  $H_2O$ );  $^1H$  NMR (400 MHz,  $D_2O$ )  $\delta$  5.51 (d,  $J = 3.6$  Hz, 1 H), 5.03 (d,  $J = 3.2$  Hz, 1 H), 4.79 (d, 1 H), 4.59–4.54 (m, 2 H), 4.27–4.09 (m, 4 H), 4.04–3.95 (m, 3 H), 3.85–3.69 (m, 9 H), 3.59 (t,  $J = 9.6$  Hz, 1 H), 3.42 (s, 3 H), 3.31–3.28 (m, 2 H);  $^{13}C$  NMR (100 MHz,  $D_2O$ )  $\delta$  100.1, 99.8, 98.6, 98.2, 79.8, 79.7, 78.8, 78.1, 77.6, 76.6, 75.7, 74.53, 74.46, 71.7, 69.4, 69.1, 68.0, 65.9, 65.8, 57.9, 57.2, 55.5, 55.4; ESI-MS ( $m/z$ ) 394.8  $[M-8Na^++5H^+]/3$ , 367.8  $[M-8Na^++5H^+-SO_3]/3$ . ESI-MS  $m/z$  calcd for  $C_{25}H_{39}N_2O_{39}S_6$   $[M-3H]^{3-}$  394.3, found 394.8;  $m/z$  calcd for  $C_{25}H_{39}N_2O_{36}S_5$   $[M-SO_3-3H]^{3-}$  367.7, found 367.8.

### Methyl

**(2-*O*-sulfo- $\beta$ -D-glucopyranosyluronate)-(1 $\rightarrow$ 4)-(2-*N*-acetyl-6-*O*-sulfo-2-deoxy- $\alpha$ -D-glucopyranosyl)-(1 $\rightarrow$ 4)-( $\beta$ -D-glucopyranosyluronate)-(1 $\rightarrow$ 4)-2-*N*-acetyl-6-*O*-sulfo-2-deoxy- $\alpha$ -D-glucopyranoside (3)**

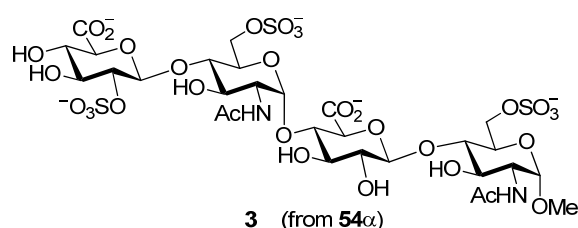

Similar procedures as that for **53 $\alpha$**  $\rightarrow$ **2** were applied for **54 $\alpha$**  $\rightarrow$ **3** (26 mg, 67%; a white solid):  $[\alpha]_D^{28} = +23.9$  ( $c$  0.6,  $H_2O$ );  $^1H$  NMR (400 MHz,  $D_2O$ )  $\delta$  5.34 (s, 1 H), 4.64–4.50 (m, 2 H), 4.46–4.30 (m, 2 H), 4.20 (d,  $J = 11.1$  Hz, 1 H), 4.11 (t,  $J = 8.3$  Hz, 1 H), 4.07–3.66 (m, 12 H), 3.60 (t,  $J = 9.6$  Hz, 1 H), 3.47–3.28 (m, 4 H), 2.05 (s, 2 H), 2.04 (s, 3 H);  $^{13}C$  NMR (100 MHz,  $D_2O$ )  $\delta$  174.4, 102.3, 99.8, 97.7, 97.3, 79.6, 79.0, 77.8, 77.7, 76.6, 76.1, 75.7, 74.4, 73.6, 71.7, 69.5, 69.0, 68.9, 68.4, 66.5, 65.8, 55.3, 53.3, 53.1, 22.0, 21.9; ESI-MS  $m/z$  calcd for  $C_{29}H_{43}N_2O_{32}S_3Na$   $[M+Na-3H^+]^{2-}$  525.1, found 525.3.

### Methyl

**(2-*O*-sulfo- $\beta$ -D-glucopyranosyluronate)-(1 $\rightarrow$ 4)-(2-*N*-sulfo-6-*O*-sulfo-2-deoxy- $\alpha$ -D-glucopyranosyl)-(1 $\rightarrow$ 4)-( $\beta$ -D-glucopyranosyluronate)-(1 $\rightarrow$ 4)-2-*N*-sulfo-6-*O*-sulfo-2-deoxy- $\alpha$ -D-glucopyranoside (4)**

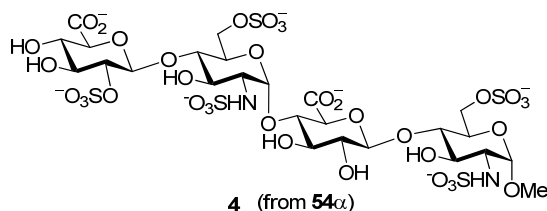

Similar procedures as that for **53 $\alpha$**  $\rightarrow$ **2** were applied for **54 $\alpha$**  $\rightarrow$ **4** (32 mg, 64%; a white solid):  $[\alpha]_{\text{D}}^{28} = +21.4$  (c 0.2, H<sub>2</sub>O); <sup>1</sup>H NMR (400 MHz, D<sub>2</sub>O)  $\delta$  5.52 (d,  $J = 3.6$  Hz, 1 H), 5.05 (d,  $J = 3.2$  Hz, 1 H), 4.79 (d, 1 H), 4.60 (d,  $J = 8.0$  Hz, 1 H), 4.56 (d,  $J = 10.8$  Hz, 1 H), 4.42 (d,  $J = 10.8$  Hz, 1 H), 4.33 (dd,  $J = 11.2$  Hz, 3.6 Hz, 1 H), 4.20 (d,  $J = 10.8$  Hz, 1 H), 4.12 (t,  $J = 8.8$  Hz, 1 H), 4.03–4.01 (m, 2 H), 3.88–3.68 (m, 9 H), 3.60 (t,  $J = 9.6$  Hz, 1 H), 3.44 (s, 3 H), 3.42–3.31 (m, 3 H); <sup>13</sup>C NMR (100 MHz, D<sub>2</sub>O)  $\delta$  181.5, 175.6, 102.2, 100.8, 99.8, 98.2, 79.7, 78.8, 78.7, 77.6, 76.6, 75.7, 75.7, 74.5, 73.0, 71.7, 69.7, 69.4, 69.0, 68.3, 66.6, 65.9, 57.9, 57.2, 55.5; ESI-MS  $m/z$  calcd for C<sub>25</sub>H<sub>39</sub>N<sub>2</sub>O<sub>36</sub>S<sub>5</sub> [M-3H<sup>+</sup>]<sup>3-</sup> 367.7, found 367.5.

**Methyl ( $\beta$ -D-glucopyranosyluronate)-(1 $\rightarrow$ 4)-(2-*N*-acetyl-6-*O*-sulfo-2-deoxy- $\alpha$ -D-glucopyranosyl)-(1 $\rightarrow$ 4)-( $\beta$ -D-glucopyranosyluronate)-(1 $\rightarrow$ 4)-2-*N*-acetyl-6-*O*-sulfo-2-deoxy- $\alpha$ -D-glucopyranoside (5)**

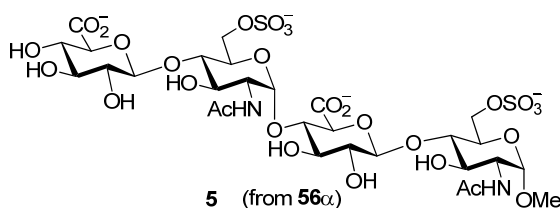

Similar procedures as that for **53 $\alpha$**  $\rightarrow$ **2** were applied for **56 $\alpha$**  $\rightarrow$ **5** (15 mg, 52%; a white solid):  $[\alpha]_{\text{D}}^{27} = +17.0$  (c 0.4, H<sub>2</sub>O); <sup>1</sup>H NMR (400 MHz, D<sub>2</sub>O)  $\delta$  5.42 (d,  $J = 3.6$  Hz, 1 H), 4.58 (dd,  $J = 7.8, 2.1$  Hz, 2 H), 4.46 (d,  $J = 9.7$  Hz, 1 H), 4.43–4.27 (m, 2 H), 4.19 (d,  $J = 9.7$  Hz, 1 H), 4.11–3.64 (m, 13 H), 3.60–3.46 (m, 2 H), 3.44–3.28 (m, 5 H), 2.05 (s, 3 H), 2.03 (s, 3 H); <sup>13</sup>C NMR (100 MHz, D<sub>2</sub>O)  $\delta$  175.7, 174.8, 174.4, 102.2, 101.9, 97.7, 96.7, 78.8, 77.4, 76.5, 76.3, 75.7, 75.0, 73.6, 73.0, 71.9, 69.5, 69.1, 68.8, 68.3, 66.4, 65.8, 55.3, 53.1, 21.91, 21.86; ESI-MS  $m/z$  calcd for C<sub>29</sub>H<sub>44</sub>N<sub>2</sub>O<sub>29</sub>S<sub>2</sub> [M-2H]<sup>2-</sup> 474.1, found 474.2.

**Methyl ( $\beta$ -D-glucopyranosyluronate)-(1 $\rightarrow$ 4)-(2-*N*-sulfo-6-*O*-sulfo-2-deoxy- $\alpha$ -D-glucopyranosyl)-(1 $\rightarrow$ 4)-( $\beta$ -D-glucopyranosyluronate)-(1 $\rightarrow$ 4)-2-*N*-sulfo-6-*O*-sulfo-2-deoxy- $\alpha$ -D-glucopyranoside (6)**

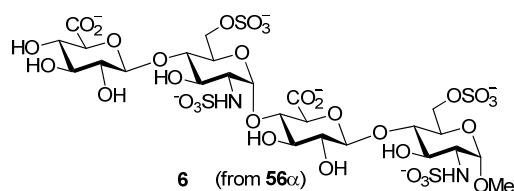

Similar procedures as that for **53α**→**2** were applied for **56α**→**6** (18 mg, 35%; a white solid):  $[\alpha]_{\text{D}}^{28} = +21.0$  (c 0.1, H<sub>2</sub>O); <sup>1</sup>H NMR (400 MHz, D<sub>2</sub>O)  $\delta$  5.66 (d,  $J = 3.5$  Hz, 1 H), 5.05 (d,  $J = 3.5$  Hz, 2 H), 4.60 (d,  $J = 7.8$  Hz, 3 H), 4.48 (d,  $J = 10.0$  Hz, 1 H), 4.41 (d,  $J = 10.0$  Hz, 1 H), 4.33 (dd,  $J = 11.1, 4.9$  Hz, 1 H), 4.19 (d,  $J = 10.8$  Hz, 1 H), 4.03 (d,  $J = 9.7$  Hz, 2 H), 3.91–3.63 (m, 9 H), 3.60–3.25 (m, 10 H); <sup>13</sup>C NMR (100 MHz, D<sub>2</sub>O)  $\delta$  175.7, 174.9, 101.9, 101.7, 98.1, 97.0, 78.1, 76.9, 76.3, 76.2, 76.0, 75.7, 75.0, 72.9, 72.8, 71.8, 69.5, 69.3, 68.6, 68.1, 66.3, 65.7, 57.5, 57.1, 55.5; ESI-MS  $m/z$  calcd for C<sub>25</sub>H<sub>39</sub>N<sub>2</sub>O<sub>33</sub>S<sub>4</sub>Na [M+Na-3H]<sup>2-</sup> 523.1, found 523.6.

### Methyl

**(2-O-sulfo-β-D-glucopyranosylurionate)-(1→4)-(2-N-acetyl-6-O-sulfo-2-deoxy-α-D-glucopyranosyl)-(1→4)-(2-O-sulfo-α-L-iduronylurionate)-(1→4)-2-N-acetyl-6-O-sulfo-2-deoxy-α-D-glucopyranoside (7)**

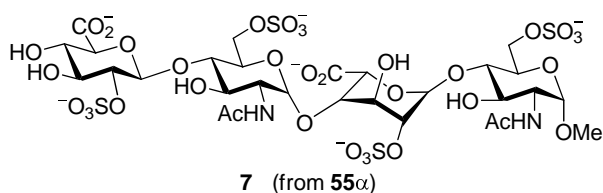

Similar procedures as that for **53α**→**2** were applied for **55α**→**7** (9 mg, 64%; a white solid):  $[\alpha]_{\text{D}}^{28} = +21.0$  (c 0.9, H<sub>2</sub>O); <sup>1</sup>H NMR (400 MHz, D<sub>2</sub>O)  $\delta$  5.21 (s, 1 H), 5.17 (d,  $J = 3.7$  Hz, 1 H), 4.83 (d,  $J = 2.1$  Hz, 2 H), 4.60 (d,  $J = 10.4$  Hz, 1 H), 4.44–4.19 (m, 5 H), 4.19–4.11 (m, 1 H), 4.10–4.00 (m, 4 H), 3.98 (dd,  $J = 10.2, 3.6$  Hz, 1 H), 3.89–3.56 (m, 8 H), 3.41 (s, 3 H), 2.09 (s, 3 H), 2.05 (s, 3 H); <sup>13</sup>C NMR (100 MHz, D<sub>2</sub>O)  $\delta$  174.7, 174.5, 100.0, 99.3, 97.8, 94.2, 79.7, 78.1, 77.3, 75.7, 74.7, 74.5, 72.6, 71.7, 69.9, 69.3, 69.1, 68.7, 68.4, 66.9, 65.8, 65.6, 55.2, 53.7, 53.0, 22.2, 21.9; ESI-MS  $m/z$  calcd for C<sub>29</sub>H<sub>42</sub>N<sub>2</sub>O<sub>35</sub>S<sub>4</sub>Na<sub>2</sub>, [M+2Na-4H]<sup>2-</sup>, 576.1, found 576.2.

### Methyl

**(2-O-sulfo-β-D-glucopyranosylurionate)-(1→4)-(2-N-sulfo-6-O-sulfo-2-deoxy-α-D-glucopyranosyl)-(1→4)-(2-O-sulfo-α-L-iduronylurionate)-(1→4)-2-N-sulfo-6-O-sulfo-2-deoxy-α-D-glucopyranoside (8)**

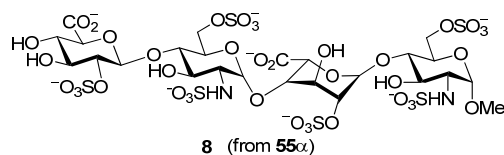

Similar procedures as that for **53α→2** were applied for **55α→8** (27 mg, 58%; a white solid):  $[\alpha]_{\text{D}}^{28} = +25.6$  (*c* 0.6, H<sub>2</sub>O); <sup>1</sup>H NMR (400 MHz, D<sub>2</sub>O)  $\delta$  5.42 (s, 1 H), 5.28 (s, 1 H), 5.04 (d, *J* = 2.4 Hz, 1 H), 4.59 (d, *J* = 10.3 Hz, 1 H), 4.45–3.94 (m, 8 H), 3.89–3.51 (m, 7 H), 3.44 (s, 3 H), 3.39–3.14 (m, 2 H); <sup>13</sup>C NMR (100 MHz, D<sub>2</sub>O)  $\delta$  100.4, 98.6, 97.7, 80.2, 78.4, 77.7, 77.2, 76.4, 74.9, 72.2, 70.4, 69.5, 69.3, 69.0, 67.4, 66.3, 58.2, 55.9; ESI-MS *m/z* calcd for C<sub>25</sub>H<sub>39</sub>N<sub>2</sub>O<sub>39</sub>S<sub>6</sub> [M-3H]<sup>3-</sup> 394.3, found 394.2; *m/z* calcd for C<sub>25</sub>H<sub>38</sub>N<sub>2</sub>O<sub>39</sub>S<sub>6</sub>Na [M+Na-4H]<sup>3-</sup> 401.7, found 401.9.

### Methyl

**(2-*O*-sulfo- $\alpha$ -L-iduopyranosyluronate)-(1→4)-(2-*N*-acetyl-6-*O*-sulfo-2-deoxy- $\alpha$ -D-glucopyranosyl)-(1→4)-(2-*O*-sulfo- $\beta$ -D-glucopyranosyluronate)-(1→4)-2-*N*-acetyl-6-*O*-sulfo-2-deoxy- $\alpha$ -D-glucopyranoside (**9**)**

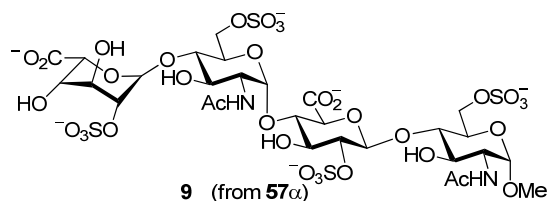

Similar procedures as that for **53α→2** were applied for **57α→9** (18 mg, 55%; a white solid):  $[\alpha]_{\text{D}}^{28} = +40.9$  (*c* 0.3, H<sub>2</sub>O); <sup>1</sup>H NMR (400 MHz, D<sub>2</sub>O)  $\delta$  5.36 (d, *J* = 3.8 Hz, 1 H), 5.15 (s, 1 H), 4.75–4.66 (m, 3 H), 4.64–4.50 (m, 1 H), 4.37–4.14 (m, 5 H), 4.12–3.67 (m, 15 H), 3.35 (s, 3 H), 2.02 (s, 3 H), 2.00 (s, 3 H); <sup>13</sup>C NMR (100 MHz, D<sub>2</sub>O)  $\delta$  176.2, 174.7, 174.5, 174.5, 100.0, 99.2, 97.8, 97.1, 80.3, 78.1, 76.5, 76.4, 75.3, 74.3, 69.5, 69.3, 69.0, 69.0, 68.3, 66.3, 66.0, 55.4, 53.7, 53.2, 22.02, 21.99; ESI-MS *m/z* calcd for C<sub>29</sub>H<sub>42</sub>N<sub>2</sub>O<sub>35</sub>S<sub>4</sub>Na<sub>2</sub> [M+2Na-3H]<sup>2-</sup> 576.1, found 576.2.

### Methyl

**(2-*O*-sulfo- $\alpha$ -L-iduopyranosyluronate)-(1→4)-(2-*N*-sulfo-6-*O*-sulfo-2-deoxy- $\alpha$ -D-glucopyranosyl)-(1→4)-(2-*O*-sulfo- $\beta$ -D-glucopyranosyluronate)-(1→4)-2-*N*-sulfo-6-*O*-sulfo-2-deoxy- $\alpha$ -D-glucopyranoside (**10**)**

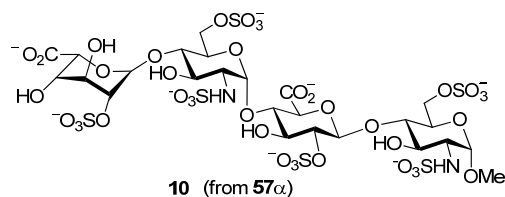

Similar procedures as that for **53α→2** were applied for **57α→10** (21 mg, 54%; a white solid):  $[\alpha]_{\text{D}}^{28} = +13.8$  (*c* 0.8, H<sub>2</sub>O); <sup>1</sup>H NMR (400 MHz, D<sub>2</sub>O)  $\delta$  5.60 (d, *J* = 3.7 Hz, 1 H), 5.46 (s, 1 H), 5.17 (s, 1 H), 5.03 (d, *J* = 3.6 Hz, 1 H), 4.84 (d, *J* = 2.2 Hz, 2 H), 4.58 (dd, *J* = 11.2, 2.2 Hz, 1 H), 4.36–4.19 (m, 4 H), 4.16–4.10 (m, 2 H), 4.04–3.92 (m, 4 H), 3.89–3.68 (m, 6 H), 3.41 (s, 3 H), 3.33–3.20 (m, 2 H); <sup>13</sup>C NMR (100 MHz, D<sub>2</sub>O)  $\delta$  176.4, 174.8, 100.1, 99.1, 98.4, 97.9, 79.9, 78.0, 77.1, 76.5, 75.0, 74.2, 69.9, 69.6, 69.2, 69.0, 68.2, 66.4, 66.0, 58.1, 57.3, 55.6; ESI-MS *m/z* calcd for

$C_{25}H_{38}N_2O_{39}S_6Na_2$   $[M+2Na-4H]^{2-}$  614.0, found 614.4;  $m/z$  calcd for  $C_{25}H_{39}N_2O_{39}S_6$   $[M-3H]^{3-}$  394.3, found 394.1.

### Methyl

**(2-*O*-sulfo- $\alpha$ -L-iduopyranosyluronate)-(1 $\rightarrow$ 4)-(2-*N*-acetyl-6-*O*-sulfo-2-deoxy- $\alpha$ -D-glucopyranosyl)-(1 $\rightarrow$ 4)-( $\beta$ -D-glucopyranosyluronate)-(1 $\rightarrow$ 4)-2-*N*-actyl-6-*O*-sulfo-2-deoxy- $\alpha$ -D-glucopyranoside (11)**

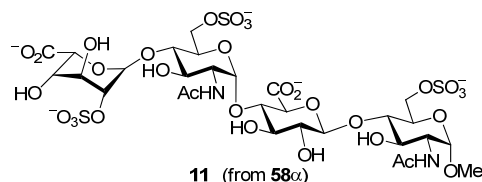

Similar procedures as that for **53 $\alpha$**  $\rightarrow$ **2** were applied for **58 $\alpha$**  $\rightarrow$ **11** (16 mg, 77%; a white solid):  $[\alpha]_D^{28} = +48.1$  ( $c$  0.3,  $H_2O$ );  $^1H$  NMR (400 MHz,  $D_2O$ )  $\delta$  8.46 (s, 1 H), 5.40 (d,  $J = 3.5$  Hz, 1 H), 5.18 (s, 1 H), 4.58 (d,  $J = 7.9$  Hz, 1 H), 4.51–4.19 (m, 5 H), 4.16–3.61 (m, 13 H), 3.40 (s, 3 H), 3.36 (t,  $J = 8.4$  Hz, 2 H), 2.05 (d, 3 H), 2.04 (d, 3 H);  $^{13}C$  NMR (100 MHz,  $D_2O$ )  $\delta$  176.3, 174.8, 174.5, 102.3, 99.2, 97.9, 97.0, 78.8, 76.6, 76.5, 76.4, 74.3, 73.7, 69.6, 69.5, 69.3, 69.0, 68.5, 66.6, 66.4, 55.5, 53.8, 53.3, 22.10, 22.05; ESI-MS  $m/z$  calcd for  $C_{29}H_{43}N_2O_{32}S_3$   $[M-3H]^{3-}$  342.4, found 342.7.

### Methyl

**(2-*O*-sulfo- $\alpha$ -L-iduopyranosyluronate)-(1 $\rightarrow$ 4)-(2-*N*-sulfo-6-*O*-sulfo-2-deoxy- $\alpha$ -D-glucopyranosyl)-(1 $\rightarrow$ 4)-( $\beta$ -D-glucopyranosyluronate)-(1 $\rightarrow$ 4)-2-*N*-sulfo-6-*O*-sulfo-2-deoxy- $\alpha$ -D-glucopyranoside (12)**

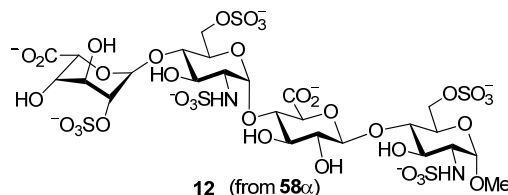

Similar procedures as that for **53 $\alpha$**  $\rightarrow$ **2** were applied for **58 $\alpha$**  $\rightarrow$ **12** (30 mg, 77%; a white solid):  $[\alpha]_D^{27} = +36.6$  ( $c$  0.4,  $H_2O$ );  $^1H$  NMR (400 MHz,  $D_2O$ )  $\delta$  5.61 (d,  $J = 2.7$  Hz, 1 H), 5.22 (s, 1 H), 5.05 (d,  $J = 3.3$  Hz, 2 H), 4.60 (d,  $J = 7.9$  Hz, 1 H), 4.48–4.18 (m, 5 H), 4.13 (s, 1 H), 4.01 (s, 3 H), 3.93–3.60 (m, 7 H), 3.52–3.18 (m, 6 H);  $^{13}C$  NMR (100 MHz,  $D_2O$ )  $\delta$  102.2, 98.2, 97.4, 78.6, 76.9, 76.4, 76.0, 74.0, 73.0, 69.7, 69.1, 68.9, 68.2, 66.5, 66.3, 58.0, 57.2, 55.5; ESI-MS  $m/z$  calcd for  $C_{25}H_{39}N_2O_{36}S_5$   $[M-3H]^{3-}$  367.7, found 367.7.

### Methyl

**(2-*O*-sulfo- $\alpha$ -L-iduopyranosyluronate)-(1 $\rightarrow$ 4)-(2-*N*-acetyl-6-*O*-sulfo-2-deoxy- $\alpha$ -D-glucopyranosyl)-(1 $\rightarrow$ 4)-2-*O*-sulfo- $\alpha$ -L-iduopyranosyluronate)-(1 $\rightarrow$ 4)-2-*N*-acetyl-6-*O*-sulfo-2-deoxy- $\alpha$ -D-glucopyranoside (13)**

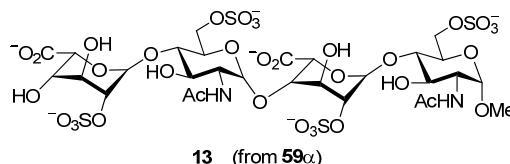

**13** (from **59α**)

Similar procedures as that for **53α**→**2** were applied for **59α**→**13** (10 mg, 71%; a white solid):  $[\alpha]_{\text{D}}^{28} = +19.2$  ( $c$  0.7,  $\text{H}_2\text{O}$ );  $^1\text{H}$  NMR (400 MHz,  $\text{D}_2\text{O}$ )  $\delta$  5.18 (s, 1 H), 5.14 (d,  $J = 3.3$  Hz, 2 H), 4.82 (dd,  $J = 6.8, 2.3$  Hz, 3 H), 4.75 (d,  $J = 3.5$  Hz, 1 H), 4.46–4.21 (m, 7 H), 4.10 (t,  $J = 3.4$  Hz, 1 H), 4.08–3.96 (m, 5 H), 3.94 (d,  $J = 3.6$  Hz, 1 H), 3.85–3.66 (m, 4 H), 3.39 (s, 3 H), 2.05 (s, 3 H), 2.03 (s, 3 H);  $^{13}\text{C}$  NMR (100 MHz,  $\text{D}_2\text{O}$ )  $\delta$  176.3, 175.0, 174.7, 174.4, 99.3, 99.3, 97.7, 93.5, 77.4, 76.7, 74.4, 73.9, 71.4, 69.9, 69.9, 69.3, 69.0, 68.8, 68.7, 68.2, 66.9, 66.4, 64.8, 55.2, 53.7, 53.4, 22.2, 21.9; ESI-MS  $m/z$  calcd for  $\text{C}_{29}\text{H}_{43}\text{N}_2\text{O}_{35}\text{S}_4\text{Na}$   $[\text{M}+\text{Na}-3\text{H}]^{2-}$  565.1, found 565.1.

### Methyl

**(2-*O*-sulfo-α-L-iduropyranosyluronate)-(1→4)-(2-*N*-sulfo-6-*O*-sulfo-2-deoxy-α-D-glucopyranosyl)-(1→4)-(2-*O*-sulfo-α-L-iduropyranosyluronate)-(1→4)-2-*N*-sulfo-6-*O*-sulfo-2-deoxy-α-D-glucopyranoside (**14**)**

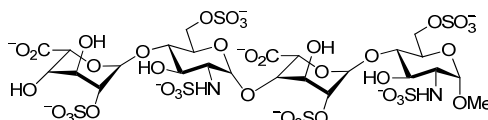

**14** (from **59α**)

Similar procedures as that for **53α**→**2** were applied for **59α**→**14** (14 mg, 73%; a white solid):  $[\alpha]_{\text{D}}^{28} = +27.8$  ( $c$  0.6,  $\text{H}_2\text{O}$ );  $^1\text{H}$  NMR (400 MHz,  $\text{D}_2\text{O}$ )  $\delta$  5.44 (d,  $J = 3.5$  Hz, 1 H), 5.23 (d,  $J = 3.2$  Hz, 1 H), 5.19 (s, 1 H), 5.04 (d,  $J = 3.6$  Hz, 1 H), 4.87 (d,  $J = 2.3$  Hz, 1 H), 4.41–4.24 (m, 7 H), 4.20 (dd,  $J = 6.3, 3.8$  Hz, 1 H), 4.13 (d,  $J = 3.7$  Hz, 2 H), 4.07 (d,  $J = 9.7$  Hz, 1 H), 4.03–3.95 (m, 2 H), 3.83–3.62 (m, 4 H), 3.44 (s, 3 H), 3.29 (dt,  $J = 10.2, 3.7$  Hz, 2 H);  $^{13}\text{C}$  NMR (100 MHz,  $\text{D}_2\text{O}$ )  $\delta$  176.4, 174.5, 99.5, 99.2, 98.3, 96.5, 77.1, 76.5, 76.0, 74.2, 70.0, 69.7, 69.2, 69.0, 68.6, 67.0, 58.1, 57.8, 55.5; ESI-MS  $m/z$  calcd for  $\text{C}_{25}\text{H}_{42}\text{N}_2\text{O}_{39}\text{S}_6$   $[\text{M}-3\text{H}]^{3-}$  394.3, found 394.6.

### Methyl

**(2-*N*-acetyl-6-*O*-sulfo-2-deoxy-α-D-glucopyranosyl)-(1→4)-(2-*O*-sulfo-β-D-glucopyranosyluronate)-(1→4)-2-*N*-acetyl-6-*O*-sulfo-2-deoxy-α-D-glucopyranoside (**15**)**

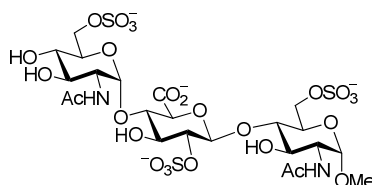

**15** (from **60α**)

Similar procedures as that for **53α**→**2** were applied for **60α**→**15** (20 mg, 66%; a white solid):  $[\alpha]_{\text{D}}^{28} = +58.3$  ( $c$  0.5,  $\text{H}_2\text{O}$ );  $^1\text{H}$  NMR (400 MHz,  $\text{D}_2\text{O}$ )  $\delta$  5.44 (d,  $J = 3.8$

Hz, 1 H), 4.61 (dd,  $J = 11.2, 2.0$  Hz, 1 H), 4.39 (dd,  $J = 11.1, 2.1$  Hz, 1 H), 4.26 (d,  $J = 9.5$  Hz, 1 H), 4.21–4.08 (m, 1 H), 4.05–3.82 (m, 3 H), 3.80–3.70 (m, 1 H), 3.60 (t,  $J = 9.6$  Hz, 1 H), 3.40 (s, 1 H), 2.07 (s, 1 H), 2.04 (s, 1 H);  $^{13}\text{C}$  NMR (100 MHz,  $\text{D}_2\text{O}$ )  $\delta$  174.8, 100.0, 97.8, 97.2, 80.3, 77.9, 76.4, 76.0, 70.6, 70.1, 69.1, 68.3, 55.3, 53.2, 22.0; ESI-MS  $m/z$  calcd for  $\text{C}_{23}\text{H}_{36}\text{N}_2\text{O}_{26}\text{S}_3$   $[\text{M}-2\text{H}]^{2-}$  426.0, found 426.2;  $m/z$  calcd for  $\text{C}_{23}\text{H}_{35}\text{N}_2\text{O}_{26}\text{S}_3\text{Na}$   $[\text{M}+\text{Na}-3\text{H}]^{3-}$  437.0, found 437.4,  $m/z$  calcd for  $\text{C}_{51}\text{H}_{60}\text{N}_2\text{O}_{23}\text{S}_2$   $[\text{M}-\text{SO}_3-2\text{H}]^{2-}$  386.0, found 386.4;  $m/z$  calcd for  $\text{C}_{23}\text{H}_{36}\text{N}_2\text{O}_{26}\text{S}_3$   $[\text{M}-3\text{H}]^{2-}$  283.7, found 283.9.

### Methyl

**(2-*N*-sulfo-6-*O*-sulfo-2-deoxy- $\alpha$ -D-glucopyranosyl)-(1 $\rightarrow$ 4)-(2-*O*-sulfo- $\beta$ -D-glucopyranosyluronate)-(1 $\rightarrow$ 4)-2-*N*-acetyl-6-*O*-sulfo-2-deoxy- $\alpha$ -D-glucopyranoside (16)**

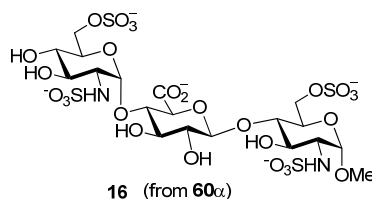

Similar procedures as that for **53 $\alpha$ →2** were applied for **60 $\alpha$ →16** (14 mg, 70%; a white solid):  $[\alpha]_{\text{D}}^{28} = +42.8$  ( $c$  0.5,  $\text{H}_2\text{O}$ );  $^1\text{H}$  NMR (400 MHz,  $\text{D}_2\text{O}$ )  $\delta$  5.69 (d,  $J = 2.4$  Hz, 1 H), 5.07 (d,  $J = 2.8$  Hz, 1 H), 4.79 (d,  $J = 3.6$  Hz, 1 H), 4.62 (d,  $J = 10.0$  Hz, 1 H), 4.40 (d,  $J = 10.4$  Hz, 1 H), 4.29 (d,  $J = 11.2$  Hz, 1 H), 4.23–4.15 (m, 2 H), 4.04–3.60 (m, 9 H), 3.46 (s, 3 H), 3.33–3.27 (m, 2 H);  $^{13}\text{C}$  NMR (100 MHz,  $\text{D}_2\text{O}$ )  $\delta$  100.1, 98.3, 97.8, 79.9, 77.9, 76.5, 75.1, 71.3, 70.0, 69.5, 69.1, 68.1, 66.4, 66.0, 58.0, 57.3, 55.5; ESI-MS  $m/z$  calcd for  $\text{C}_{19}\text{H}_{31}\text{N}_2\text{O}_{30}\text{S}_5$   $[\text{M}-3\text{H}]^{3-}$  309.0, found 309.2;  $m/z$  calcd for  $\text{C}_{19}\text{H}_{32}\text{N}_2\text{O}_{30}\text{S}_5$   $[\text{M}-2\text{H}]^{2-}$  464.0, found 464.2.

### Methyl

**(2-*N*-acetyl-6-*O*-sulfo-2-deoxy- $\alpha$ -D-glucopyranosyl)-(1 $\rightarrow$ 4)-( $\beta$ -D-glucopyranosyluronate)-(1 $\rightarrow$ 4)-2-*N*-acetyl-6-*O*-sulfo-2-deoxy- $\alpha$ -D-glucopyranoside (17)**

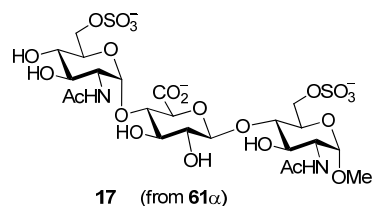

Similar procedures as that for **53 $\alpha$ →2** were applied for **61 $\alpha$ →17** (8 mg, 78%; a white solid):  $[\alpha]_{\text{D}}^{28} = +42.6$  ( $c$  0.3,  $\text{H}_2\text{O}$ );  $^1\text{H}$  NMR (400 MHz,  $\text{D}_2\text{O}$ )  $\delta$  5.42 (d,  $J = 3.0$  Hz, 1 H), 4.58 (d,  $J = 7.8$  Hz, 1 H), 4.35 (d,  $J = 9.9$  Hz, 3 H), 4.17 (d,  $J = 10.5$  Hz, 1 H), 4.07–3.64 (m, 11H), 3.58 (d,  $J = 9.6$  Hz, 1 H), 3.45–3.23 (m, 5 H), 2.03 (d,  $J = 10.2$  Hz, 6 H);  $^{13}\text{C}$  NMR (100 MHz,  $\text{D}_2\text{O}$ )  $\delta$  174.9, 174.6, 102.3, 97.9, 97.0, 78.7, 76.6, 76.5, 75.9, 73.7, 70.7, 70.2, 69.6, 69.3, 68.5, 66.5, 55.5, 53.6, 53.3, 22.1, 22.0; ESI-MS  $m/z$  calcd for  $\text{C}_{23}\text{H}_{36}\text{N}_2\text{O}_{23}\text{S}_2\text{Na}$   $[\text{M}+\text{Na}-2\text{H}]^{-}$  795.1, found 795.4.

### Methyl

(2-*N*-sulfo-6-*O*-sulfo-2-deoxy- $\alpha$ -D-glucopyranosyl)-(1 $\rightarrow$ 4)-( $\beta$ -D-glucopyranosyluronate)-(1 $\rightarrow$ 4)-2-*N*-sulfo-6-*O*-sulfo-2-deoxy- $\alpha$ -D-glucopyranoside (**18**)

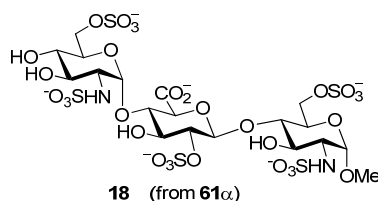

Similar procedures as that for **53 $\alpha$**  $\rightarrow$ **2** were applied for **61 $\alpha$**  $\rightarrow$ **18** (21 mg, 75%; a white solid):  $[\alpha]_{\text{D}}^{28} = +23.9$  (*c* 0.3, H<sub>2</sub>O);  $^1\text{H}$  NMR (400 MHz, D<sub>2</sub>O)  $\delta$  5.67 (d, *J* = 3.6 Hz, 2 H), 5.07 (d, *J* = 3.6 Hz, 1 H), 4.63 (d, *J* = 8.0 Hz, 1 H), 4.43–4.35 (m, 3 H), 4.19 (d, *J* = 10.8 Hz, 1 H), 4.03–4.01 (m, 1 H), 3.92–3.80 (m, 4 H), 3.77–3.70 (m, 2 H), 3.67–3.58 (m, 2 H), 3.46 (s, 3 H), 3.41 (t, *J* = 8.4 Hz, 1 H), 3.34–3.28 (m, 2 H);  $^{13}\text{C}$  NMR (100 MHz, D<sub>2</sub>O)  $\delta$  102.1, 98.2, 97.4, 78.5, 76.4, 76.3, 76.2, 73.0, 71.1, 69.8, 69.7, 69.0, 69.2, 66.5, 66.4, 57.9, 57.3, 55.5; ESI-MS *m/z* calcd for C<sub>19</sub>H<sub>31</sub>N<sub>2</sub>O<sub>27</sub>S<sub>4</sub> [M-3H]<sup>3-</sup> 283.3, found 282.3; *m/z* calcd for C<sub>19</sub>H<sub>32</sub>N<sub>2</sub>O<sub>27</sub>S<sub>4</sub> [M-2H]<sup>2-</sup> 424.0, found 424.2.

### Methyl

(2-*N*-sulfo-6-*O*-sulfo-2-deoxy- $\alpha$ -D-glucopyranosyl)-(1 $\rightarrow$ 4)-(*2-O*-sulfo- $\beta$ -L-iduopyranosyluronate)-(1 $\rightarrow$ 4)-2-*N*-acetyl-6-*O*-sulfo-2-deoxy- $\alpha$ -D-glucopyranoside (**19**)

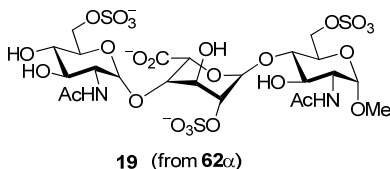

Similar procedures as that for **53 $\alpha$**  $\rightarrow$ **2** were applied for **62 $\alpha$**  $\rightarrow$ **19** (8 mg, 46%; a white solid):  $[\alpha]_{\text{D}}^{28} = +33.6$  (*c* 0.4, H<sub>2</sub>O);  $^1\text{H}$  NMR (400 MHz, D<sub>2</sub>O)  $\delta$  5.19 (s, 1 H), 5.15 (d, *J* = 3.5 Hz, 1 H), 4.84 (d, *J* = 2.2 Hz, 1 H), 4.75 (d, *J* = 3.6 Hz, 1 H), 4.30 (m, 6 H), 4.06 (br s, 1 H), 4.05–3.90 (m, 4H), 3.85–3.68 (m, 3 H), 3.54 (t, *J* = 9.6 Hz, 1 H), 3.38 (s, 3 H), 2.05 (s, 3 H), 2.02 (s, 3 H).  $^{13}\text{C}$  NMR (100 MHz, D<sub>2</sub>O)  $\delta$  175.2, 174.9, 174.5, 99.3, 97.9, 94.0, 77.5, 74.6, 71.6, 71.3, 70.2, 70.0, 69.4, 68.8, 68.3, 67.0, 66.7, 65.0, 55.3, 53.8, 53.4, 22.4, 22.0; ESI-MS *m/z* calcd for C<sub>23</sub>H<sub>35</sub>N<sub>2</sub>O<sub>26</sub>S<sub>3</sub> [M-2H]<sup>2-</sup> 283.7, found 283.9; *m/z* calcd for C<sub>23</sub>H<sub>36</sub>N<sub>2</sub>O<sub>26</sub>S<sub>3</sub> [M-3H]<sup>3-</sup> 426.0, found 426.9.

### Methyl

(2-*N*-sulfo-6-*O*-sulfo-2-deoxy- $\alpha$ -D-glucopyranosyl)-(1 $\rightarrow$ 4)-(*2-O*-sulfo- $\beta$ -L-iduopyranosyluronate)-(1 $\rightarrow$ 4)-2-*N*-acetyl-6-*O*-sulfo-2-deoxy- $\alpha$ -D-glucopyranoside (**20**)

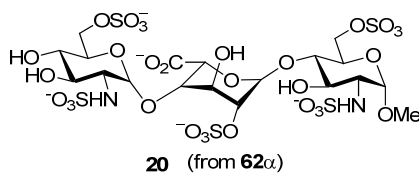

Similar procedures as that for **53α**→**2** were applied for **62α**→**20** (10 mg, 42%; a white solid):  $[\alpha]_{\text{D}}^{28} = +8.0$  (*c* 0.2, H<sub>2</sub>O); <sup>1</sup>H NMR (400 MHz, D<sub>2</sub>O)  $\delta$  5.43 (d, *J* = 3.4 Hz, 1 H), 5.22 (d, *J* = 3.1 Hz, 1 H), 5.03 (d, *J* = 3.5 Hz, 1 H), 4.46–4.28 (m, 4 H), 4.28–4.14 (m, 2 H), 4.11 (t, *J* = 3.3 Hz, 1 H), 4.05–3.86 (m, 2 H), 3.76 (t, *J* = 9.4 Hz, 1 H), 3.71–3.50 (m, 3 H), 3.42 (s, 3 H), 3.34–3.20 (m, 2 H); <sup>13</sup>C NMR (100 MHz, D<sub>2</sub>O)  $\delta$  174.6, 99.4, 98.3, 96.7, 77.0, 76.4, 75.9, 71.1, 70.04, 69.96, 69.6, 69.4, 68.6, 67.0, 66.6, 58.0, 57.8, 55.5; ESI-MS *m/z* calcd for C<sub>19</sub>H<sub>31</sub>N<sub>2</sub>O<sub>30</sub>S<sub>5</sub> [M-3H]<sup>3-</sup> 309.0, found 309.0; *m/z* calcd for C<sub>19</sub>H<sub>31</sub>N<sub>2</sub>O<sub>30</sub>S<sub>5</sub>Na [M+Na-3H]<sup>2-</sup> 475.0, found 475.0.

#### Reference:

- (S1) Orgueira, H.; Bartolozzi, A.; Schell, P.; Litjens, R.; Palmacci, E.; Seeberger, P. H. *Chem. Eur. J.* **2003**, *9*, 140-169.
- (S2) Chen, J.; Zhou, Y.; Chen, C.; Xu, W.; Yu, B. *Carbohydr. Res.* **2008**, *343*, 2853-2862.
- (S3) Zhou, Y.; Lin, F.; Chen, J.; Yu, B. *Carbohydr. Res.* **2006**, *341*, 1619-1629.
- (S4) Polat T.; Wong, C.-H. *J. Am. Chem. Soc.* **2007**, *129*, 12795-12800.
- (S5) Nathalie, K.; Jean-Claude J. *J. Chem. Soc., Perkin Trans. 1* **2000**, *16*, 2709-2718.
- (S6) Masato, O.; Tatsushi, T.; Naohiro, F.; Shoichi, K. *Tetrahedron Lett.* **2004**, *45*, 4039-4042.
- (S7) Nadine, B.; Jean-Claude, J. *Carbohydr. Res.* **2002**, *337*, 673-690.

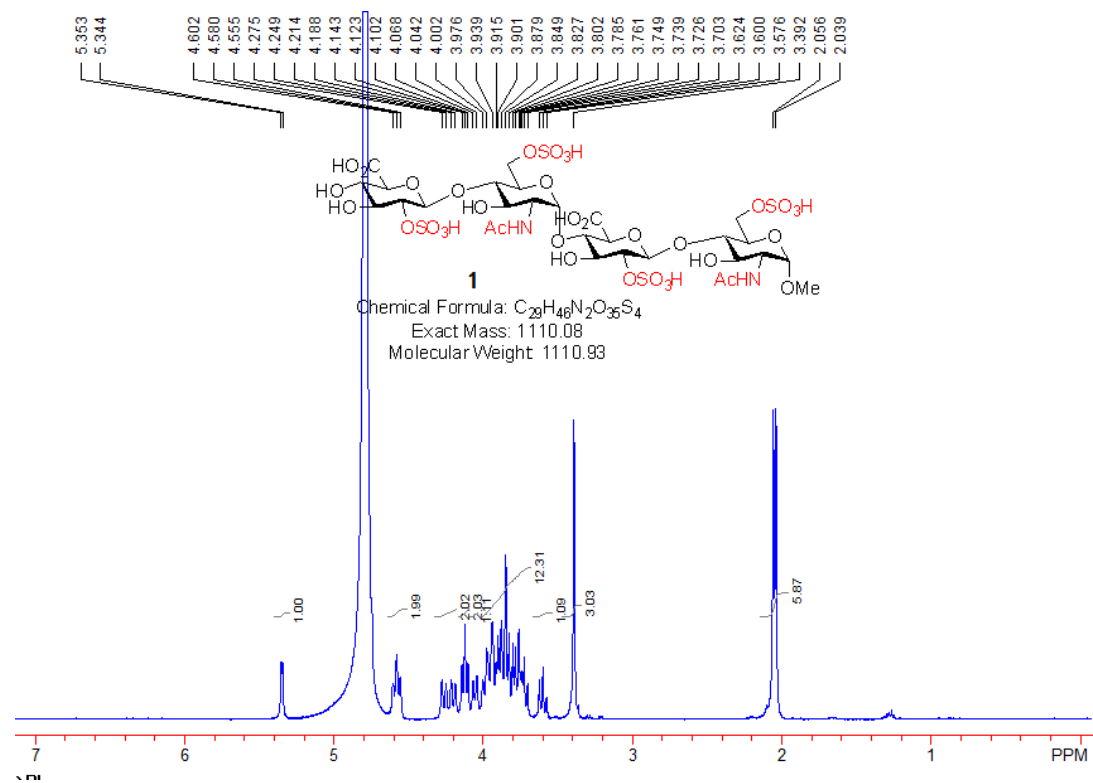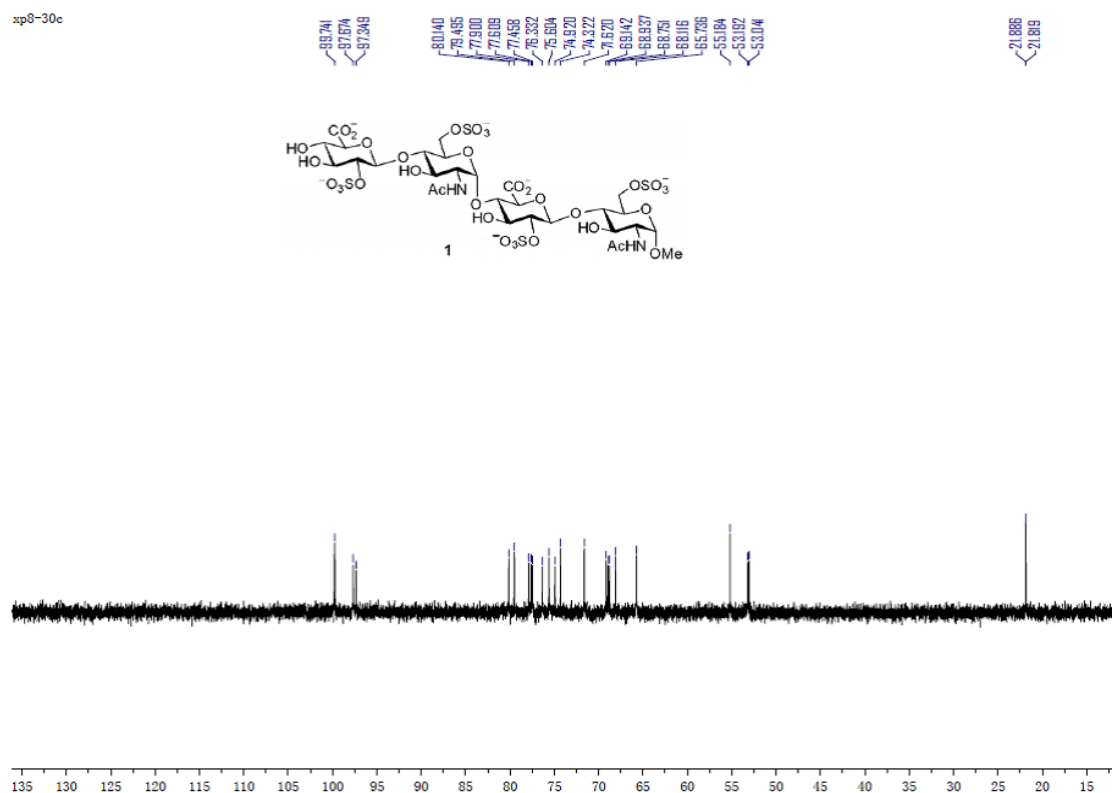

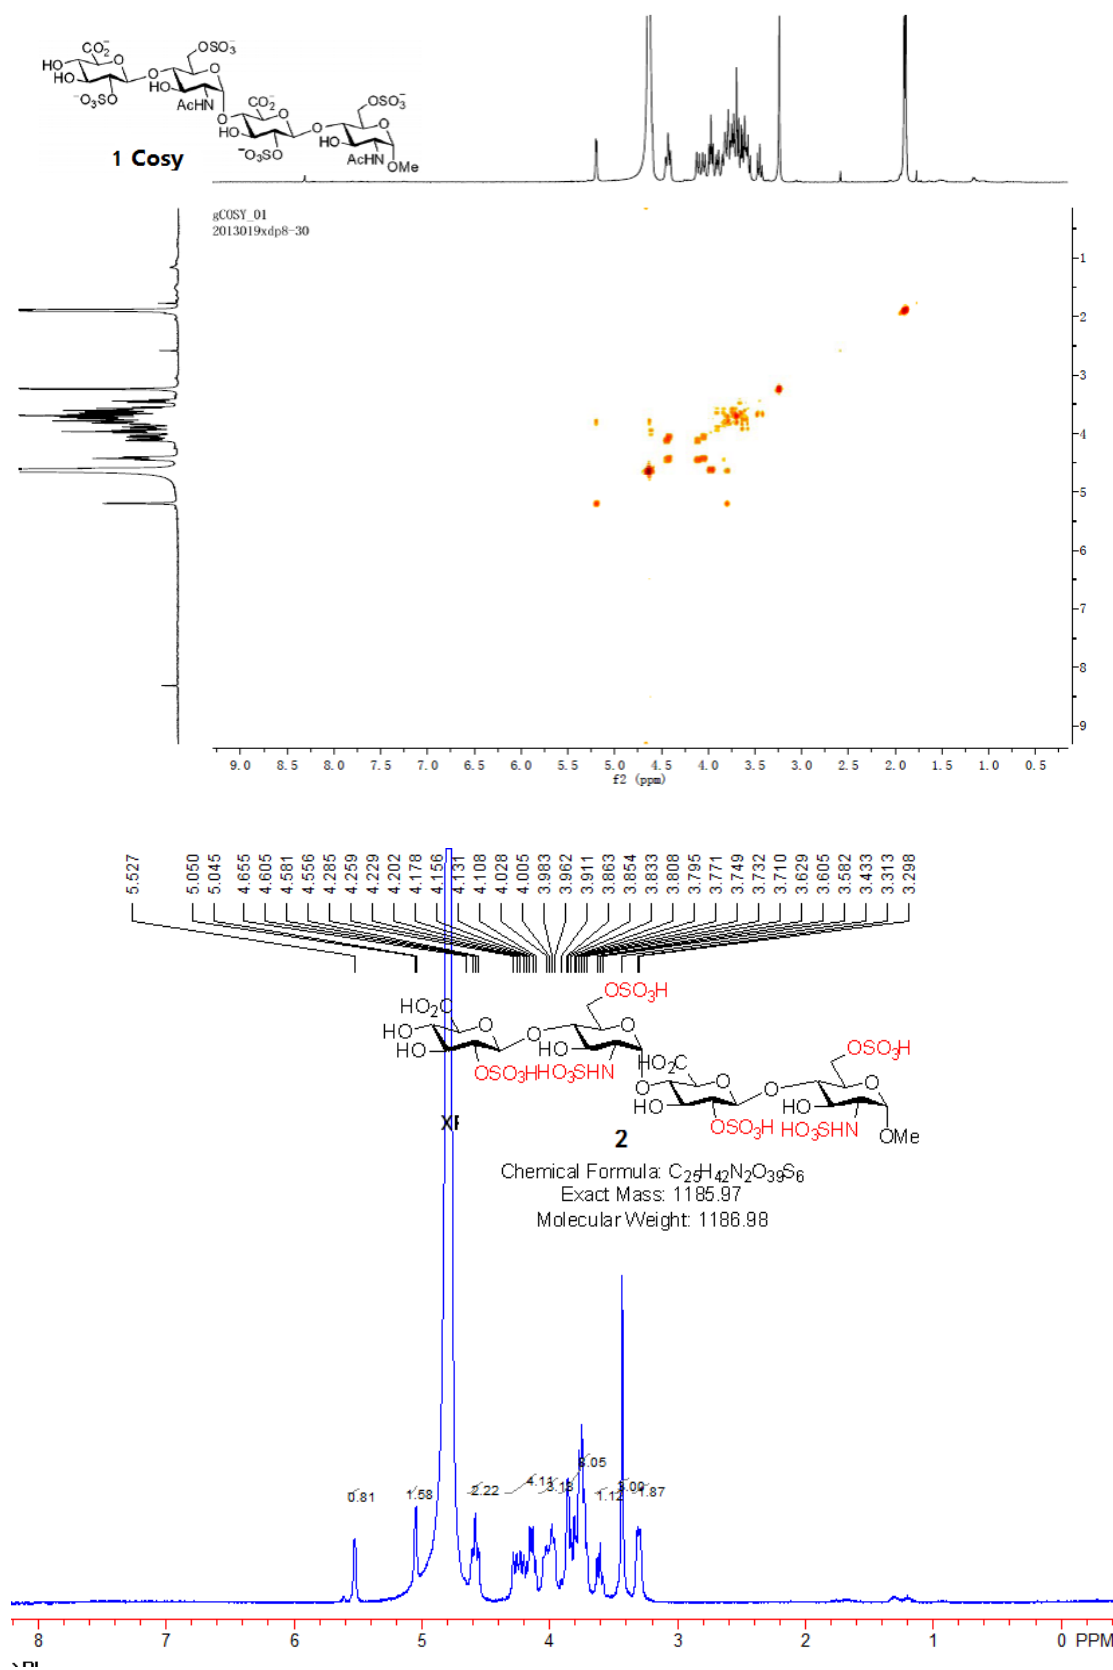

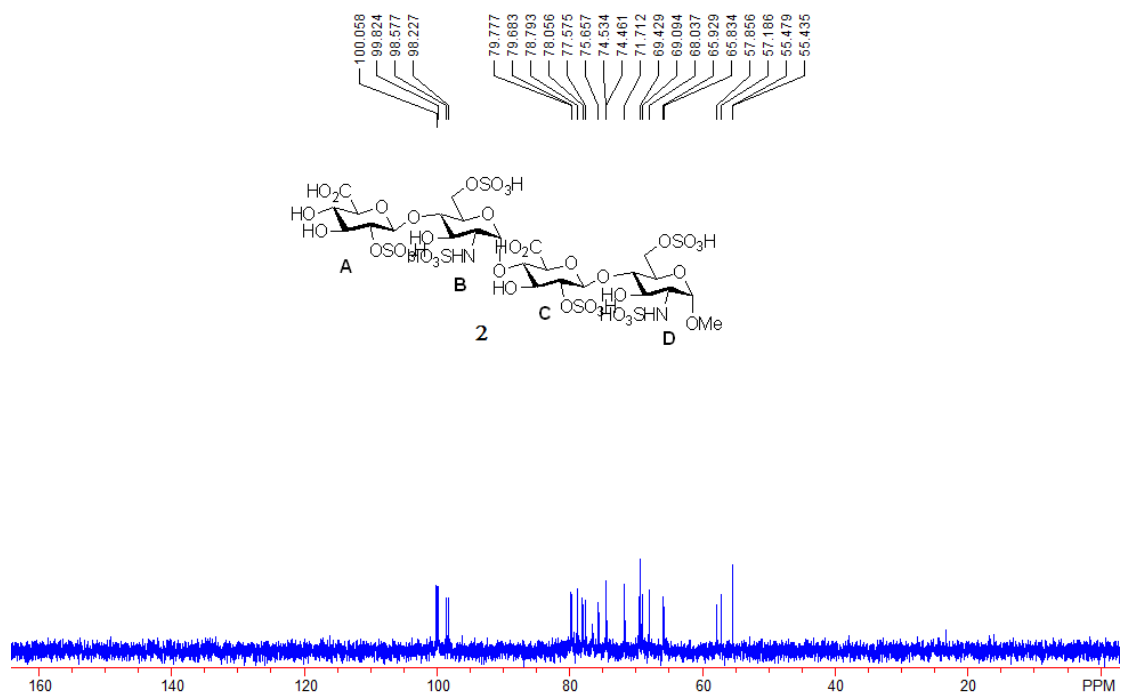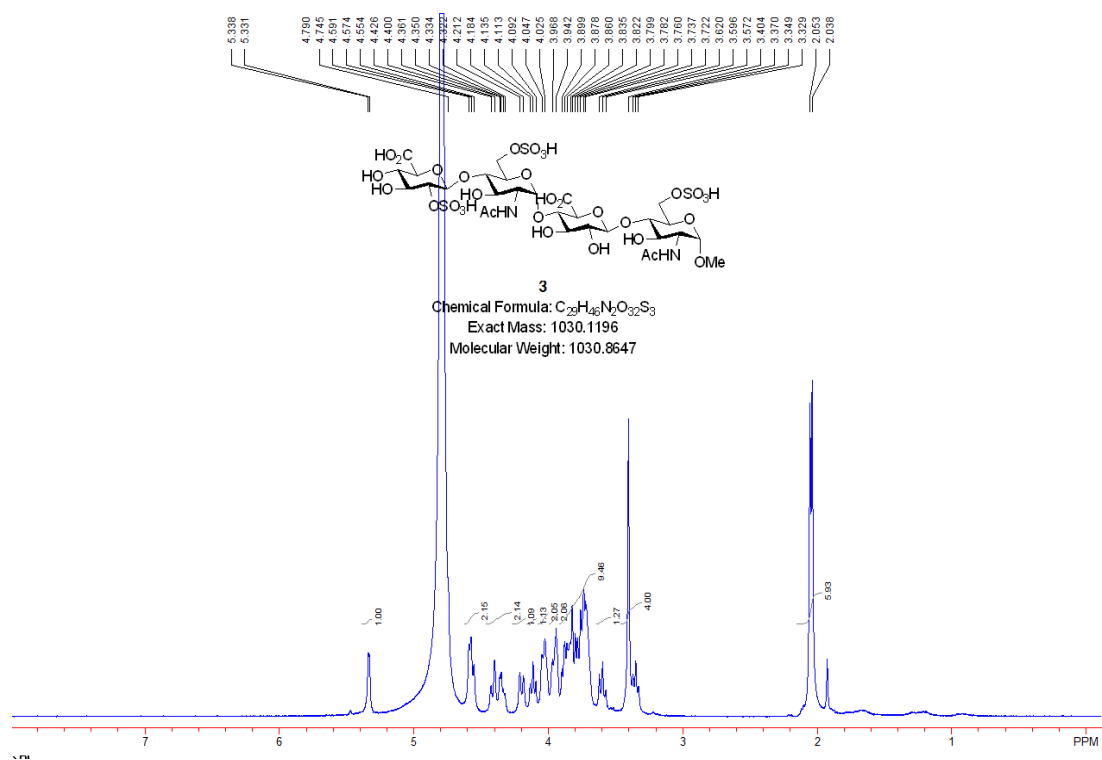

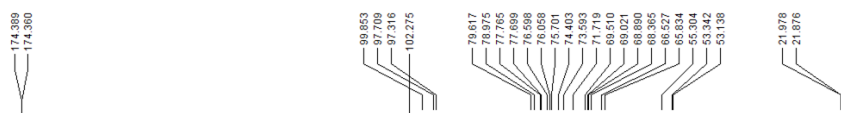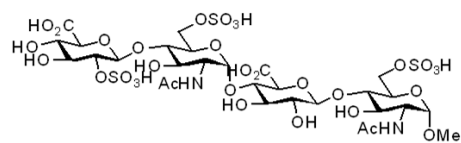

3

Chemical Formula:  $C_{29}H_{46}N_2O_{32}S_3$   
 Exact Mass: 1030.1196  
 Molecular Weight: 1030.8647

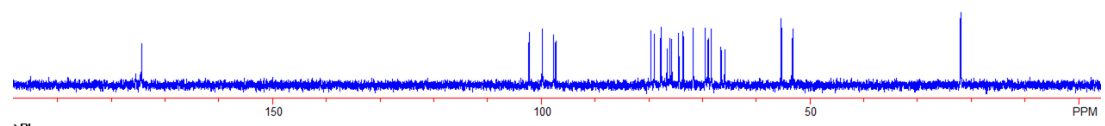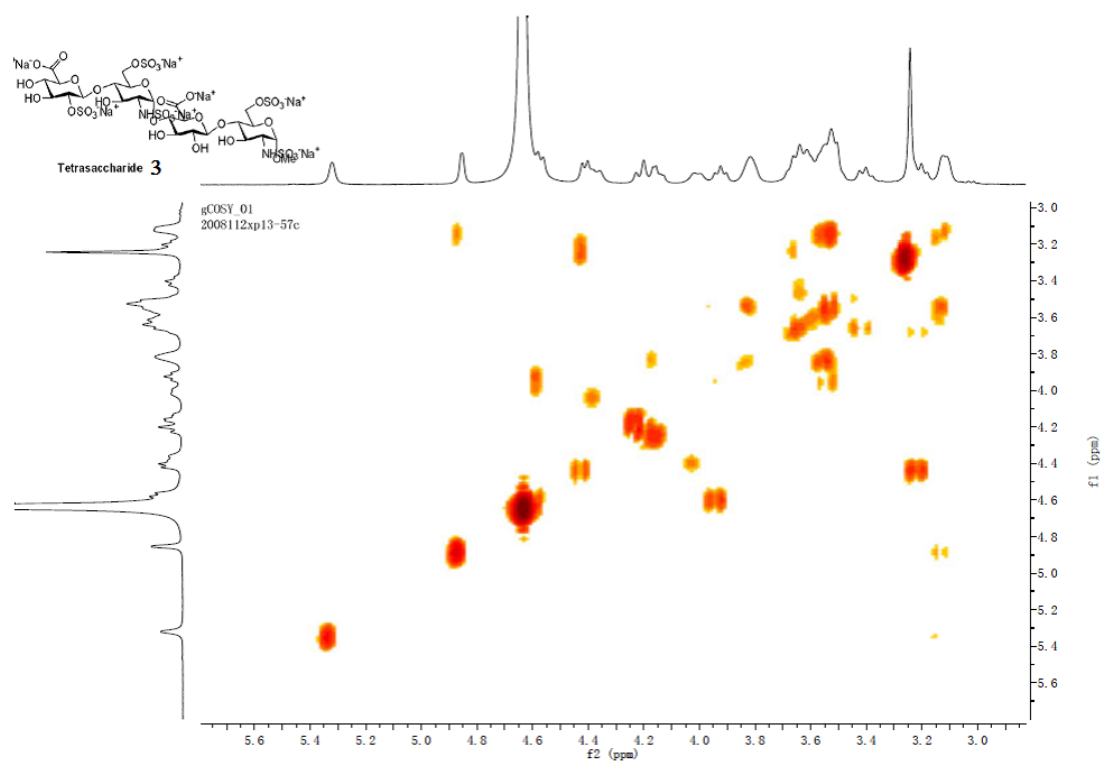

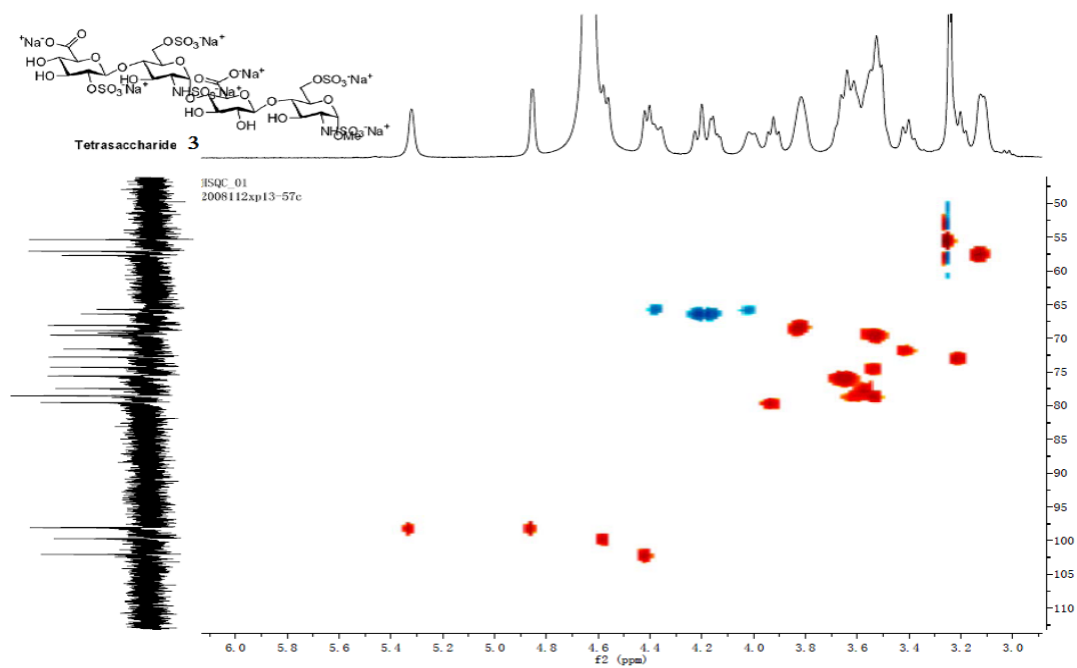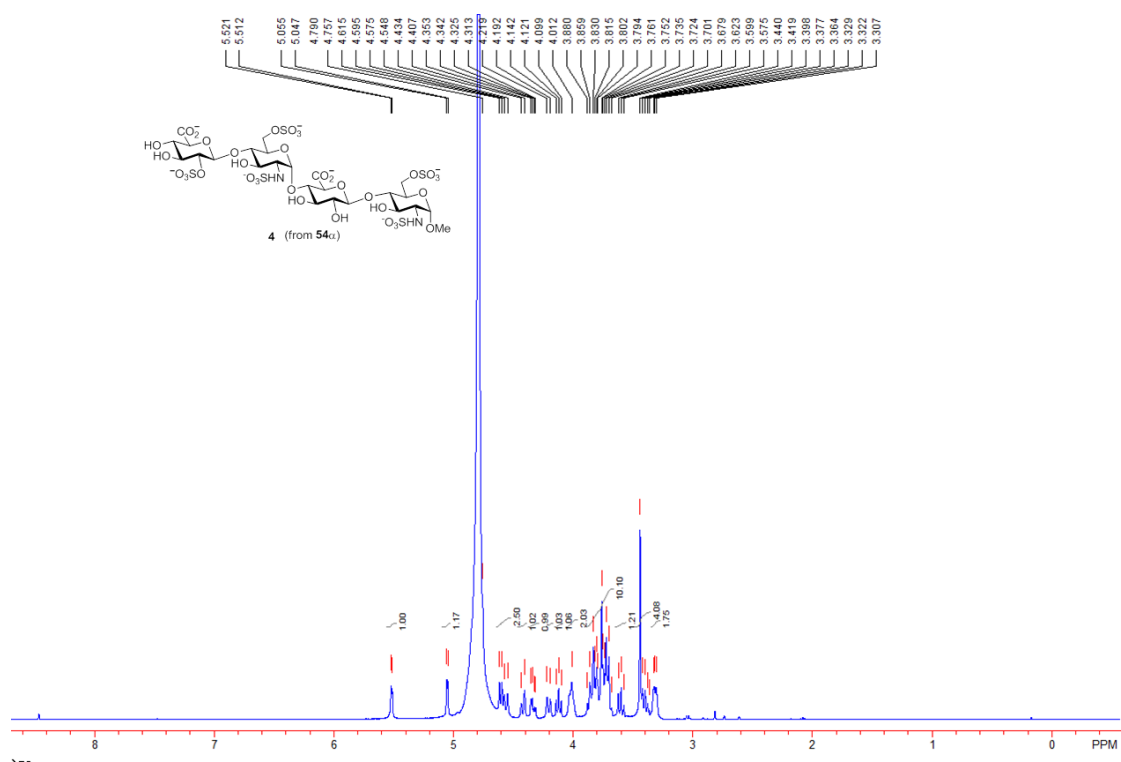

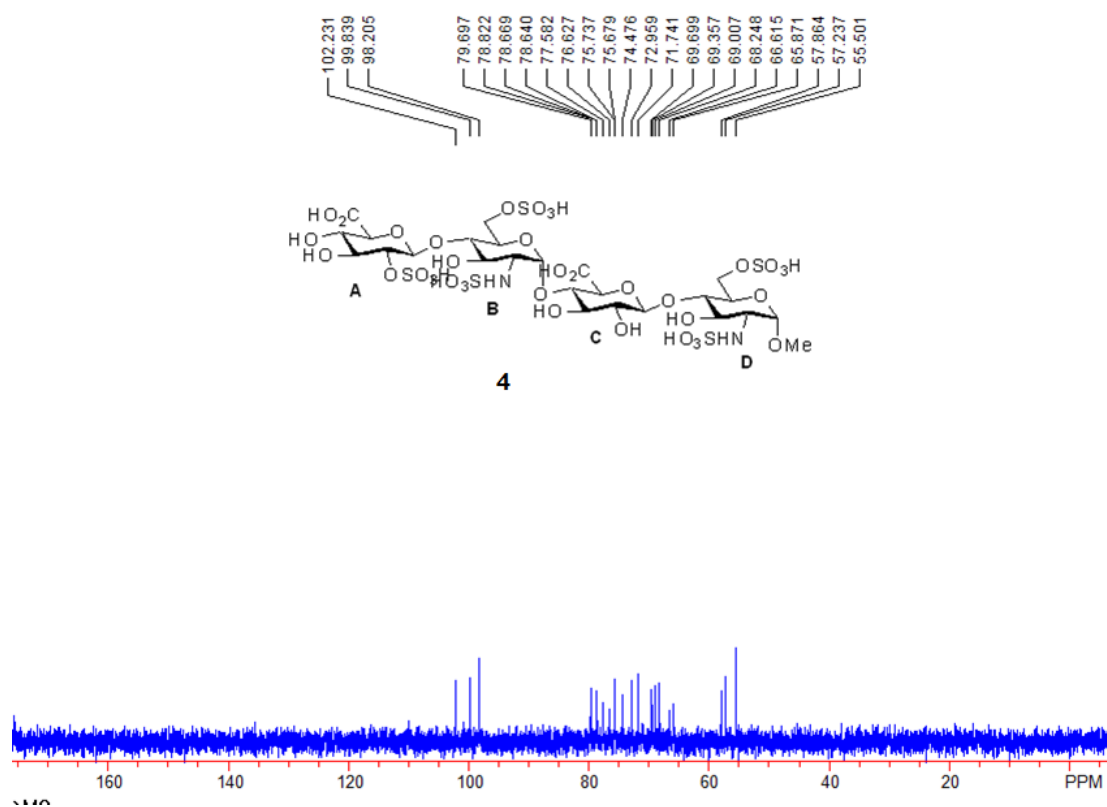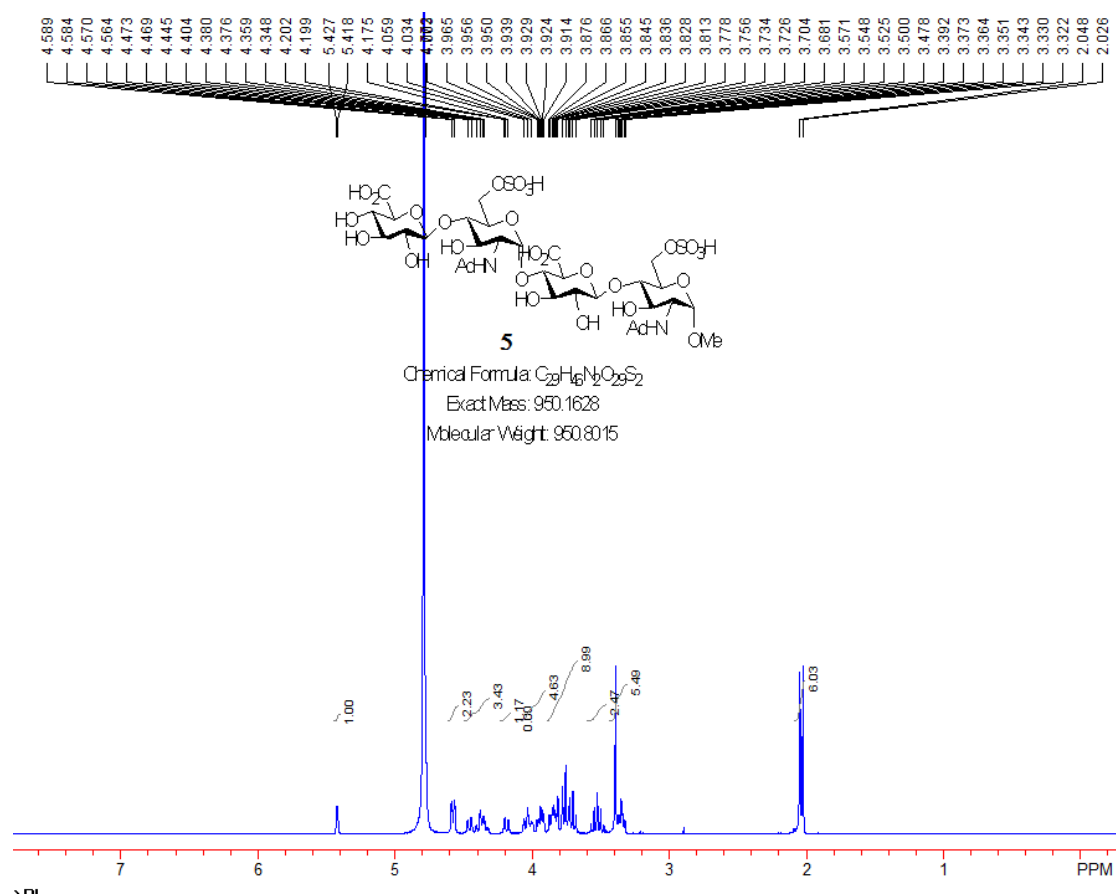

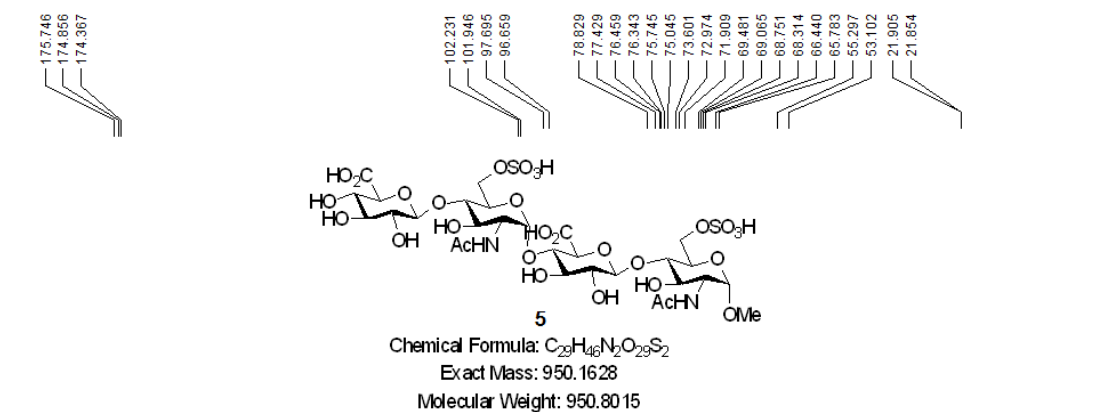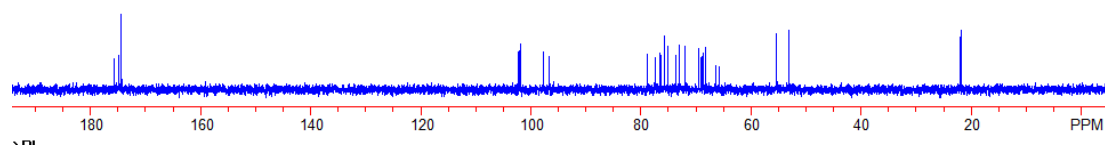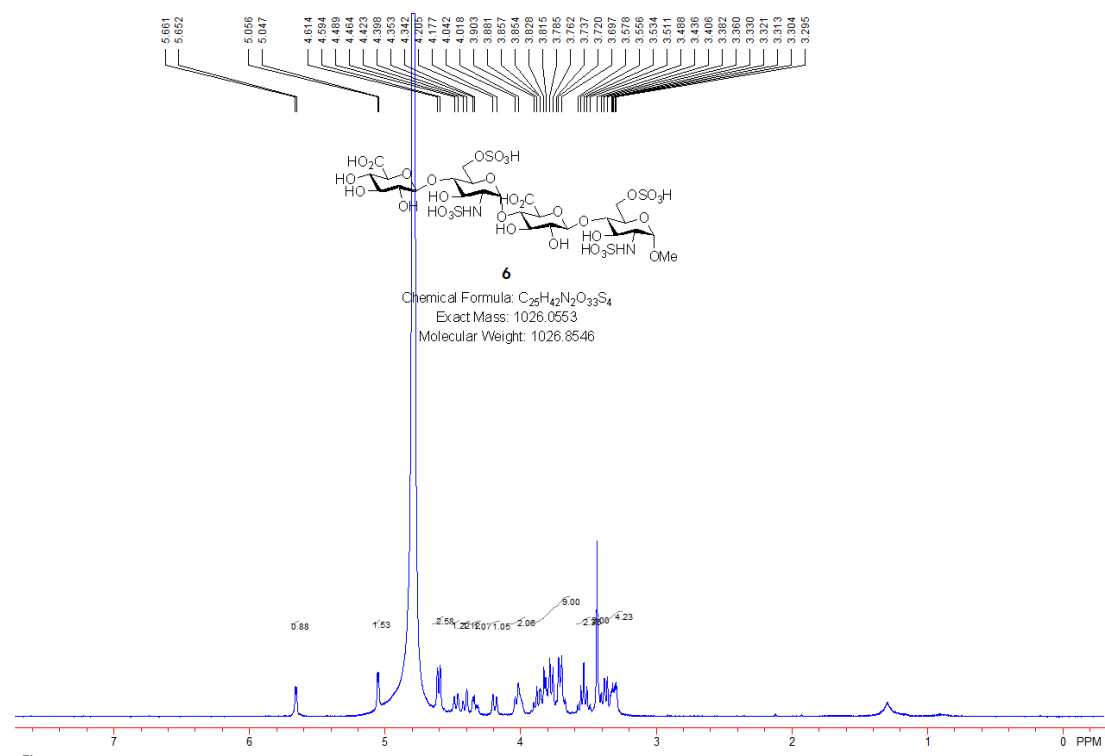

xp15-12C

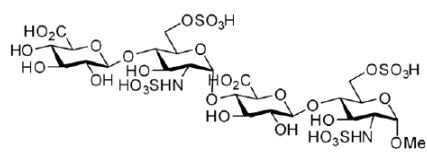

Chemical Formula:  $C_{25}H_{42}N_2O_{13}S_4$

Exact Mass: 1026.0553

Molecular Weight: 1026.8546

108.9100  
108.705  
98.142  
97.030  
76.254  
76.165  
75.646  
74.983  
72.858  
72.798  
71.795  
68.555  
68.429  
57.127  
55.445

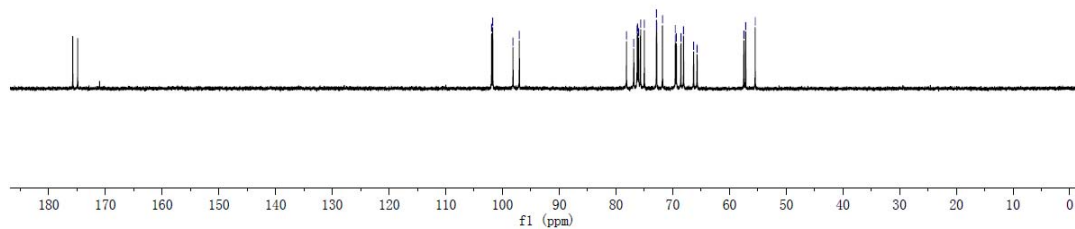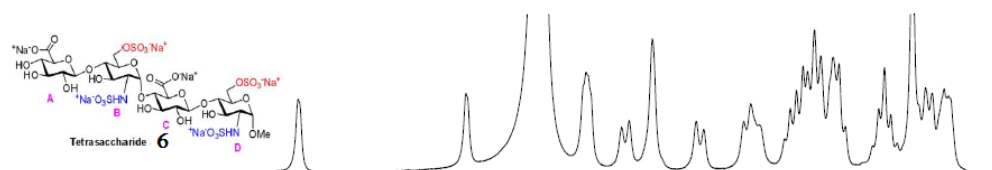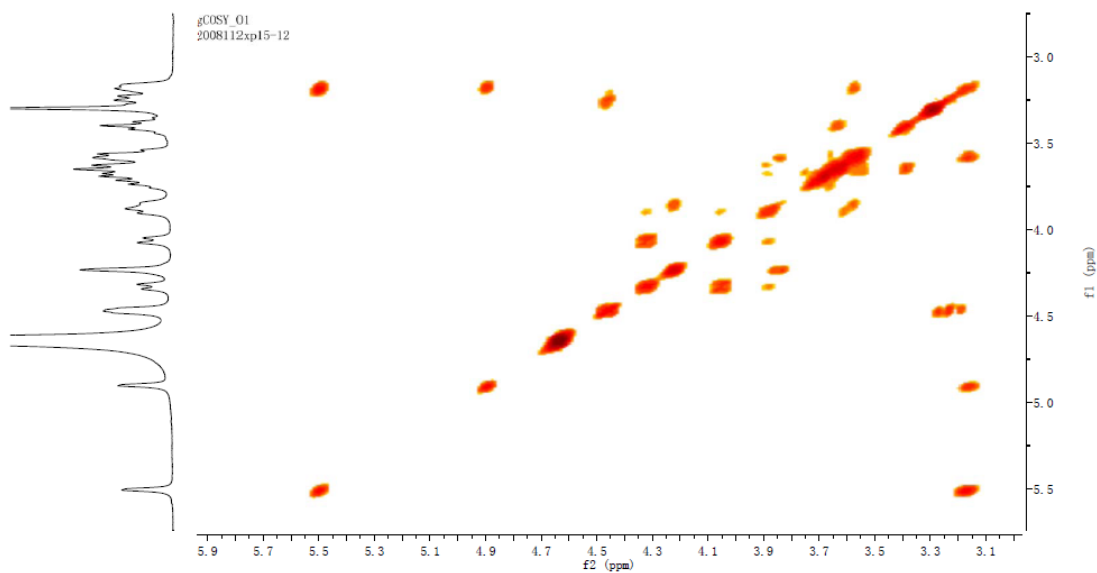

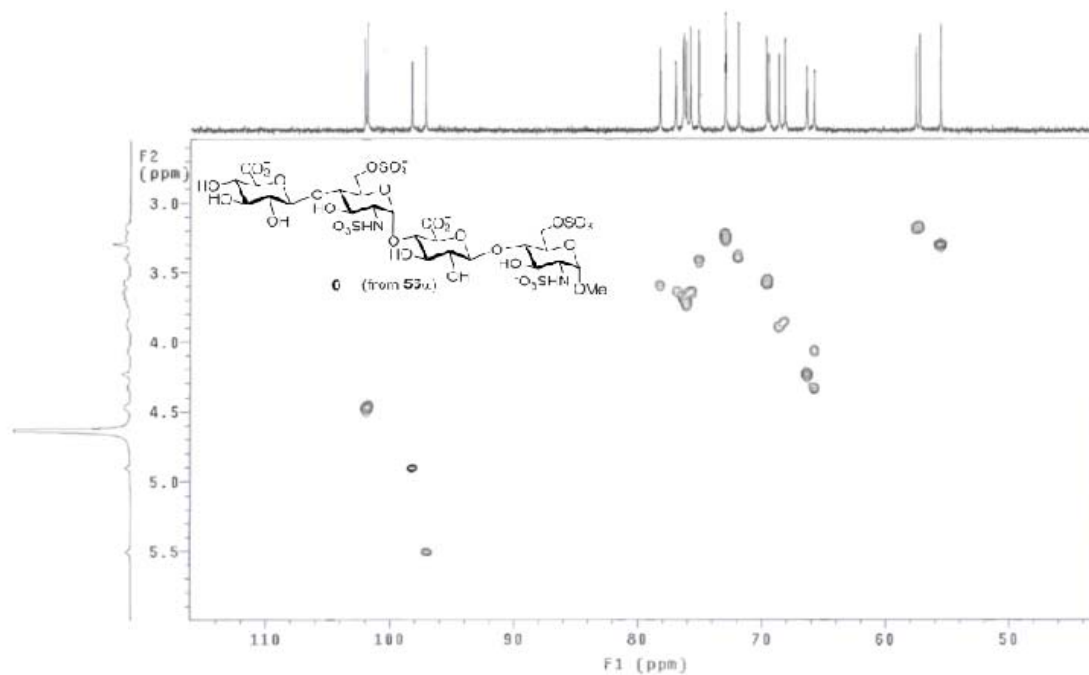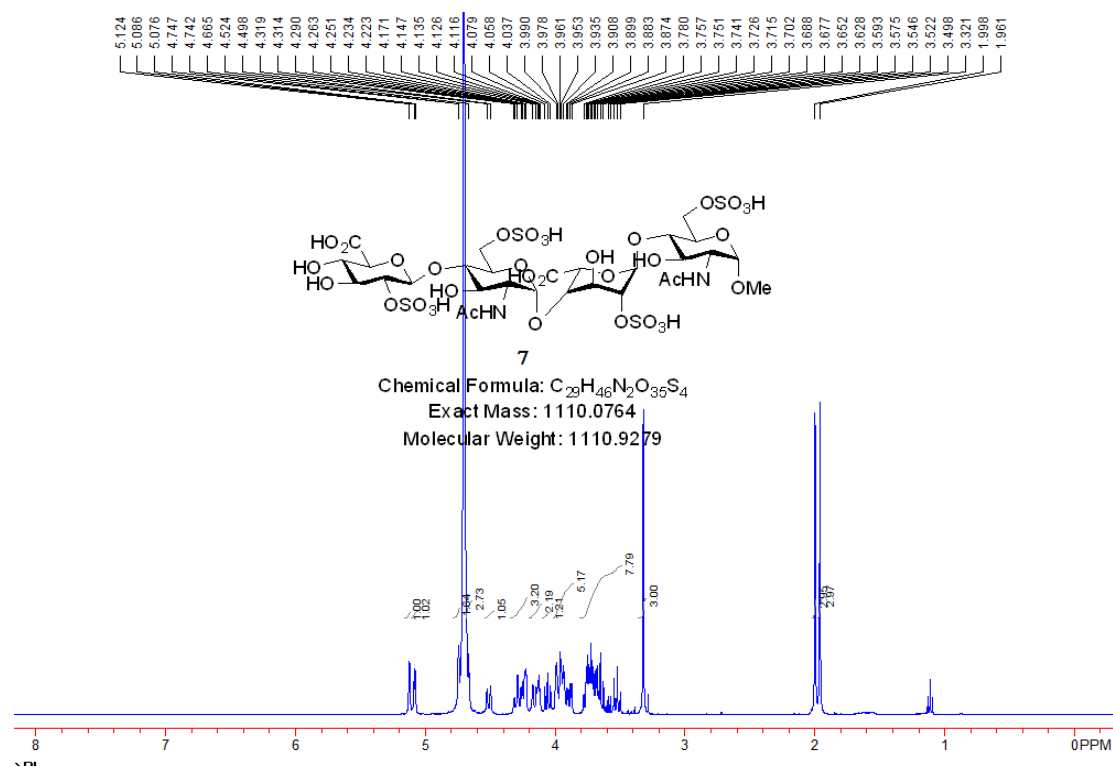

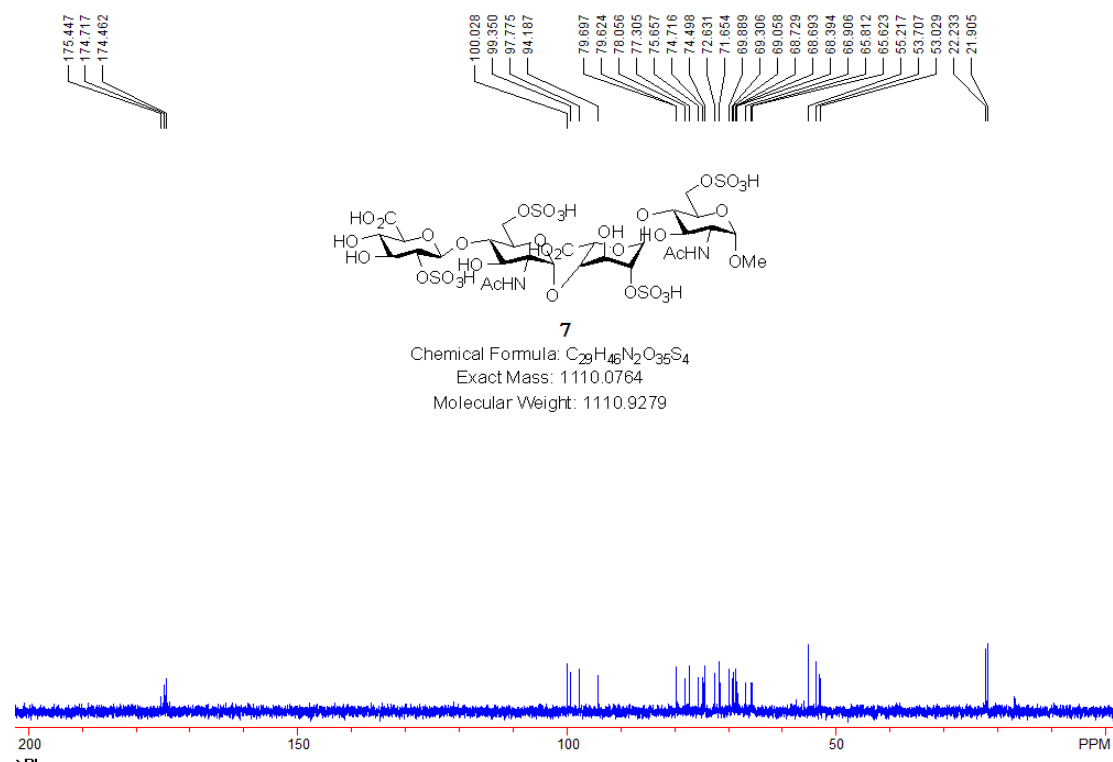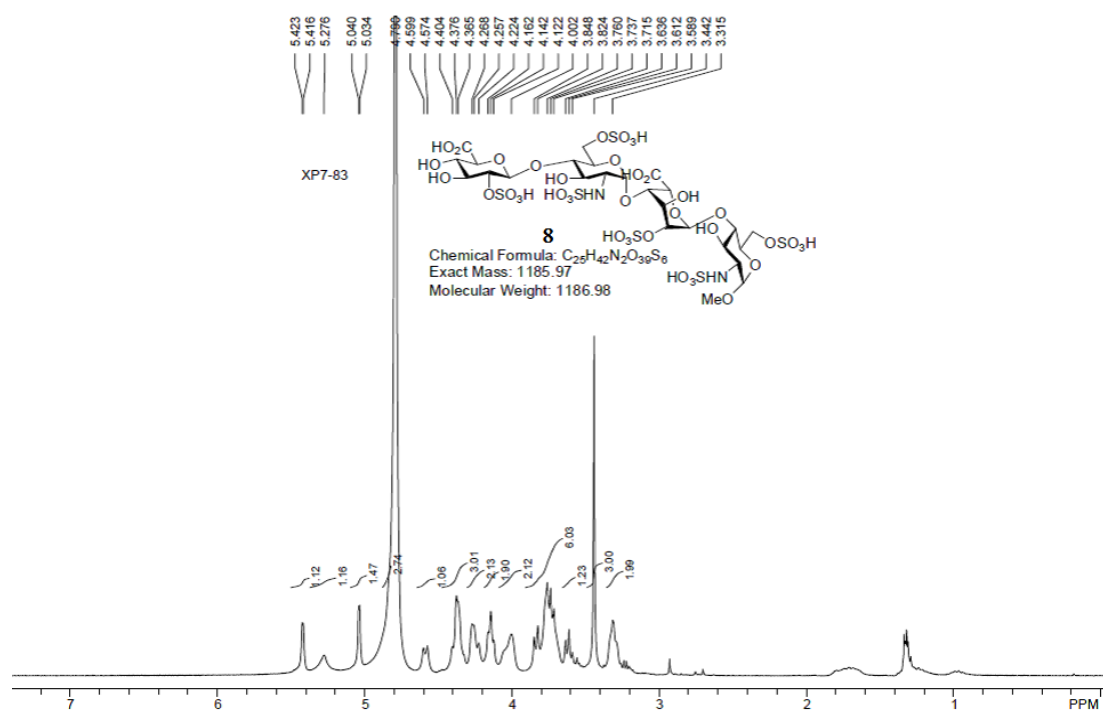

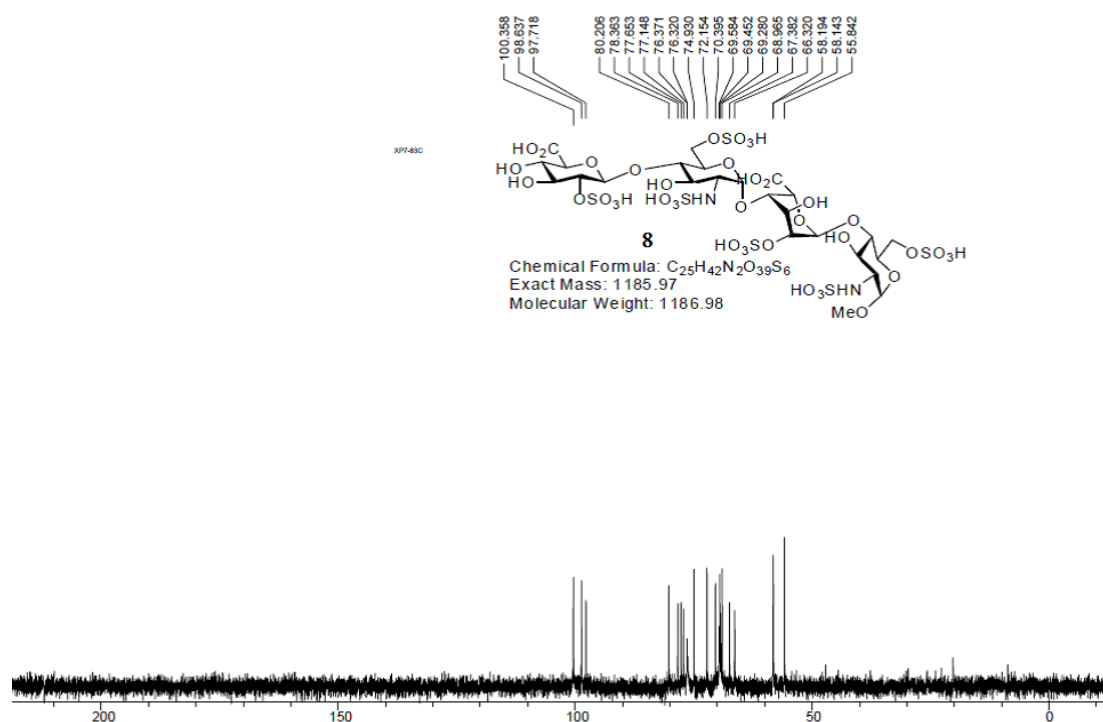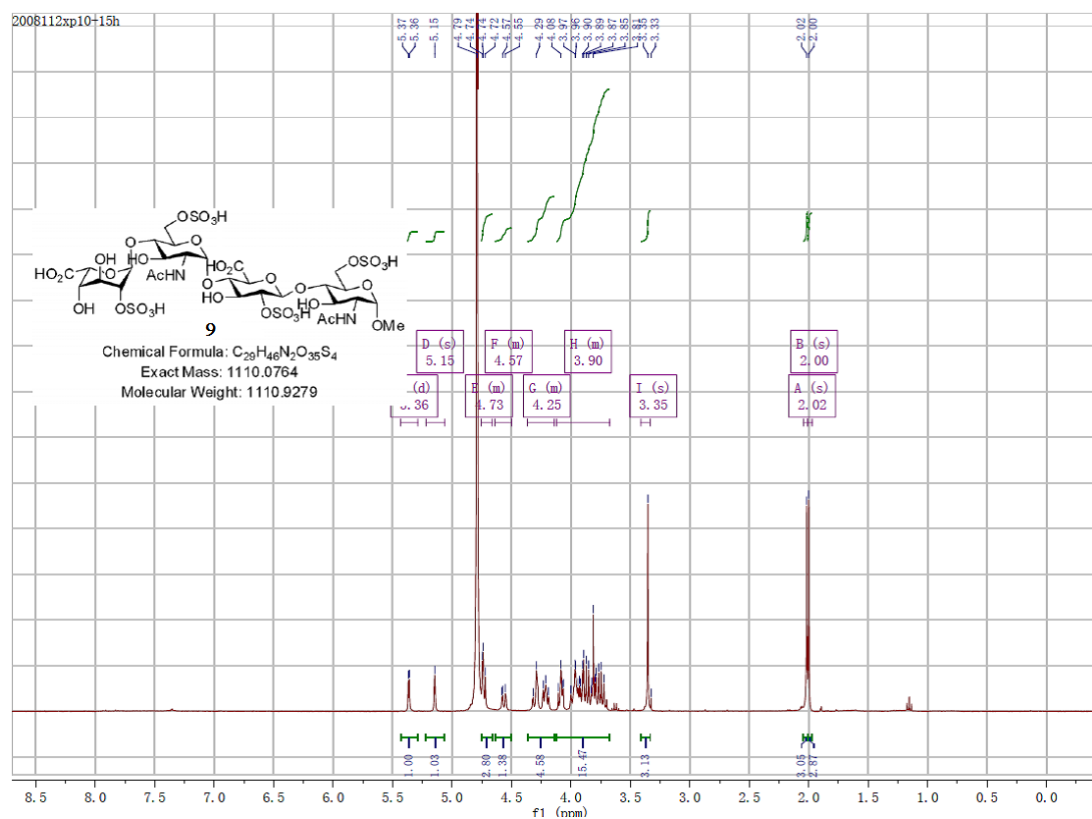

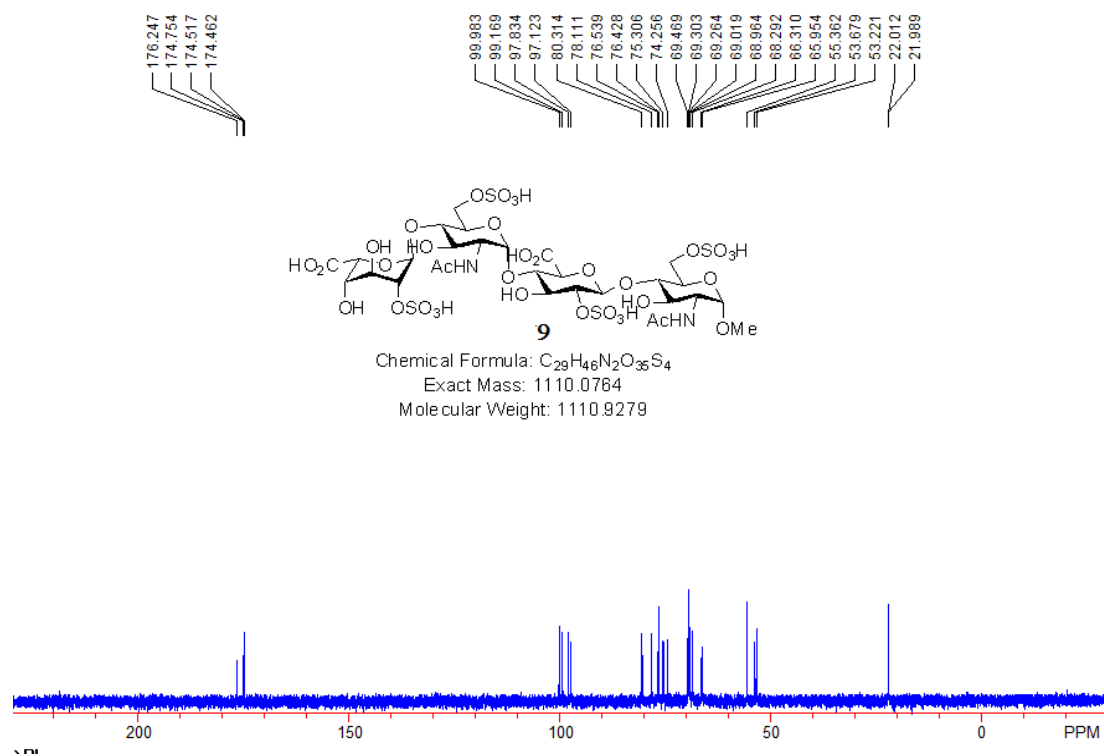

2008112xp10-14hhhh

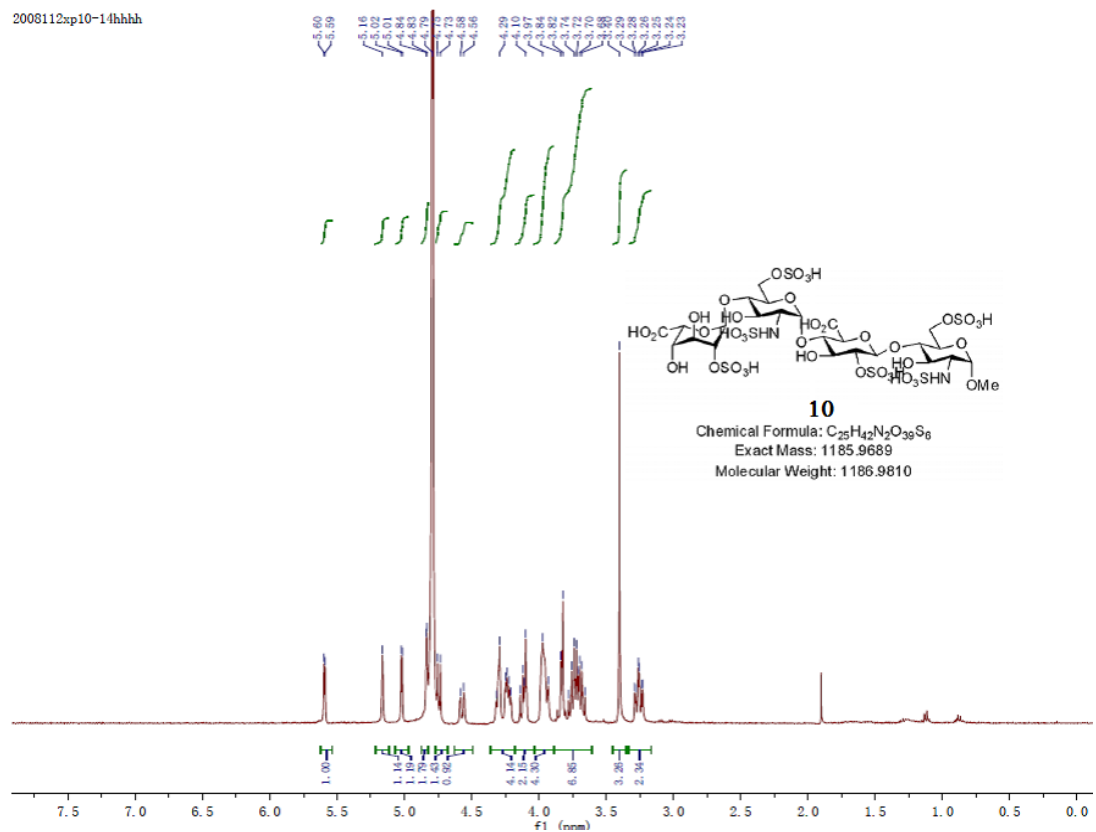

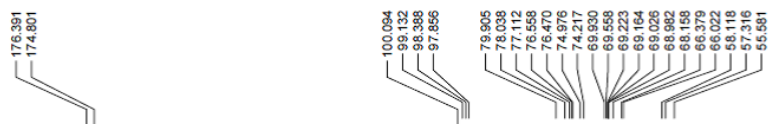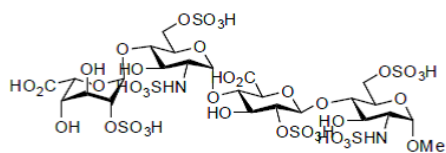

**10**

Chemical Formula:  $C_{25}H_{42}N_2O_{39}S_6$

Exact Mass: 1185.9689

Molecular Weight: 1186.9810

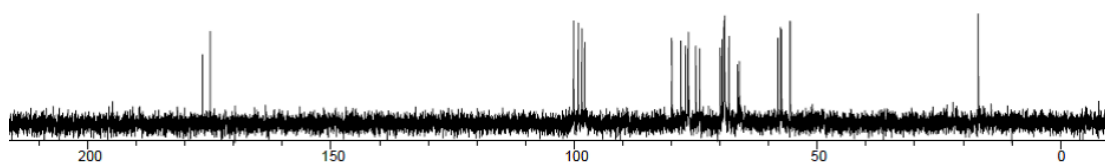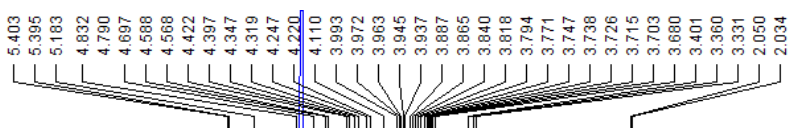

XP7-64-D2O-400MHz

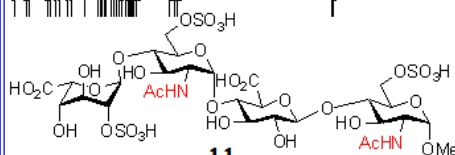

**11**

Chemical Formula:  $C_{29}H_{48}N_2O_{33}S_3$

Exact Mass: 1030.12

Molecular Weight: 1030.86

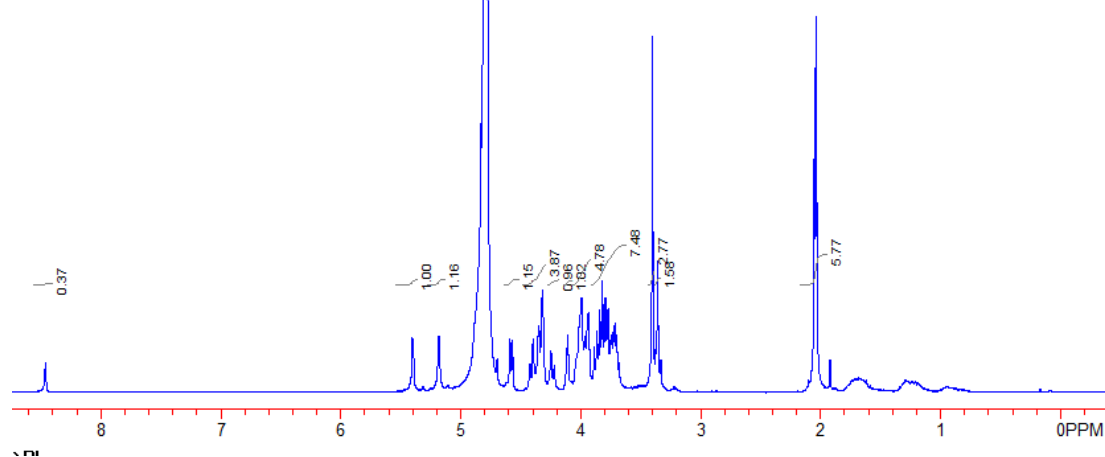

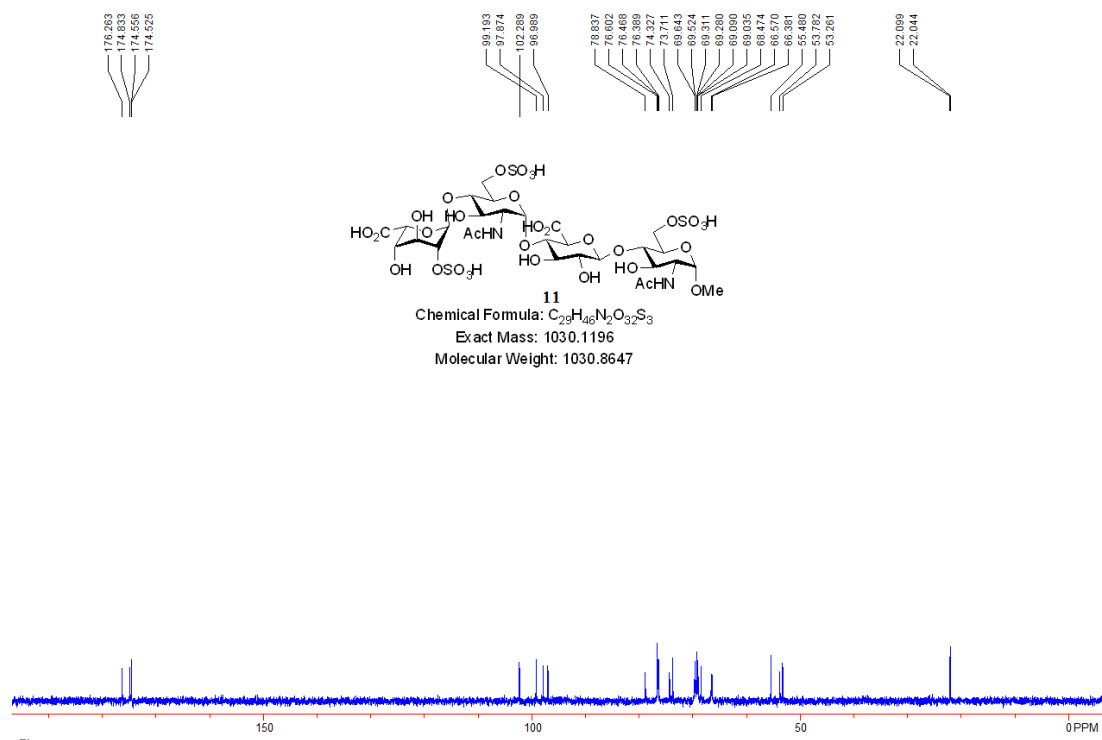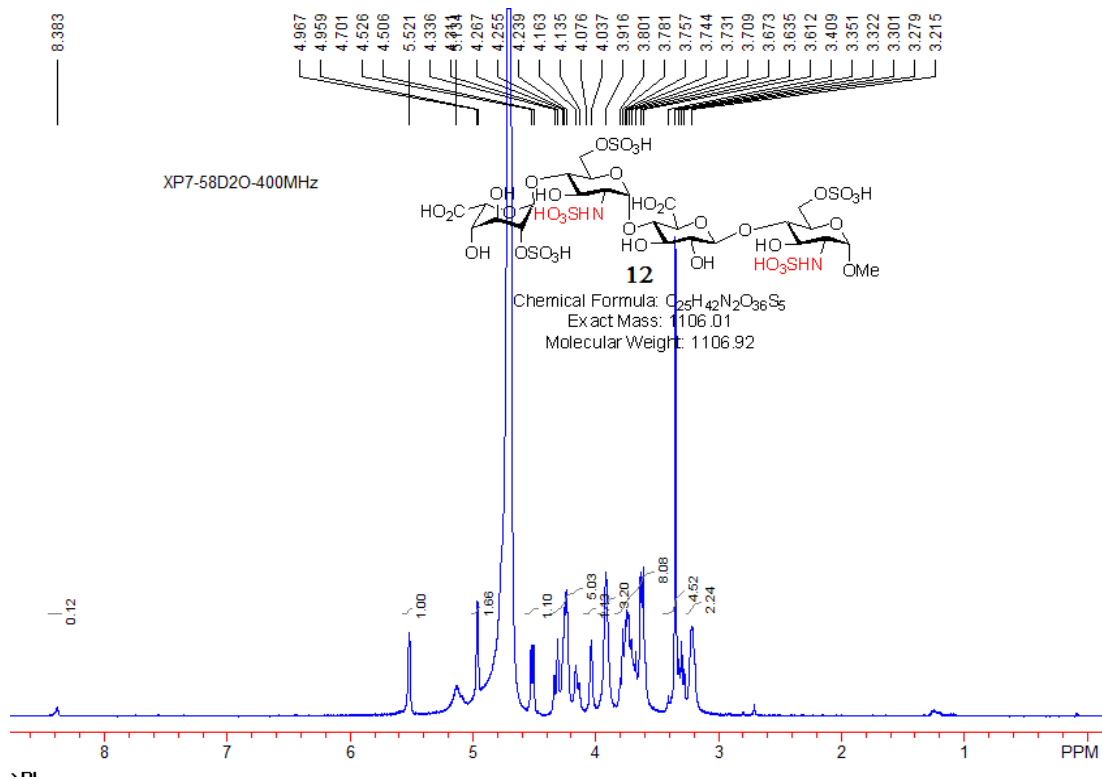

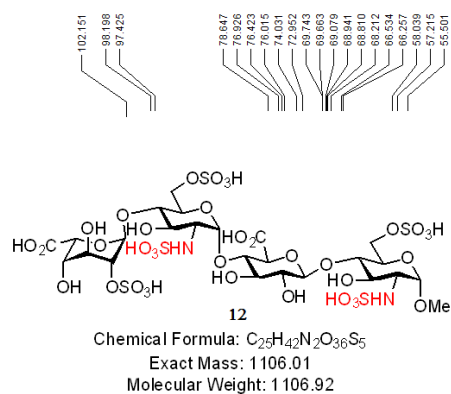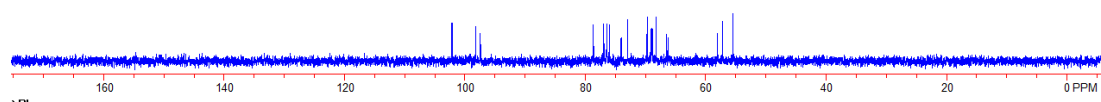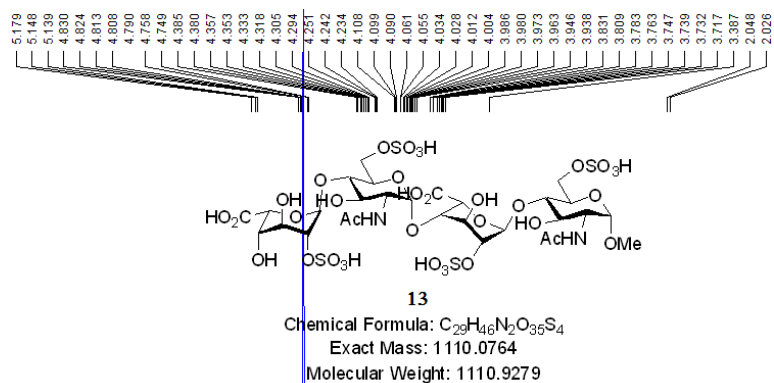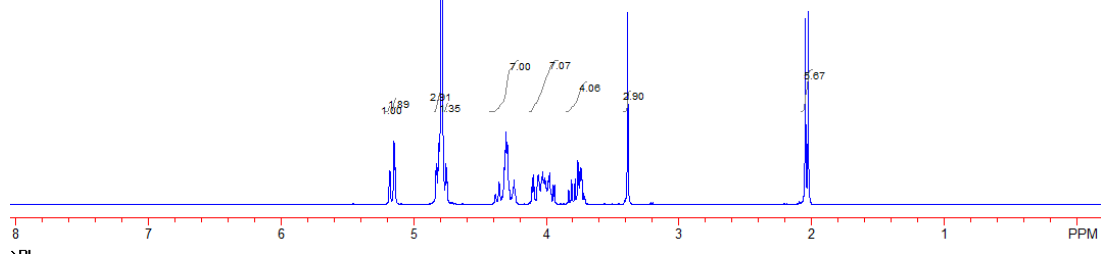

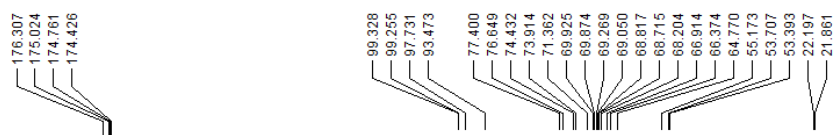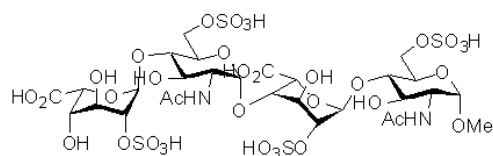

**13**

Chemical Formula:  $C_{29}H_{46}N_2O_{35}S_4$

Exact Mass: 1110.0764

Molecular Weight: 1110.9279

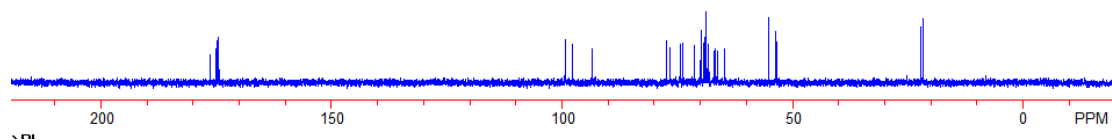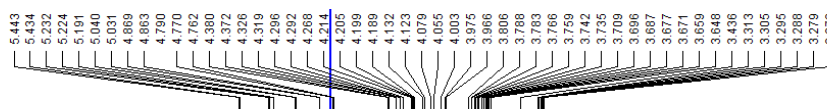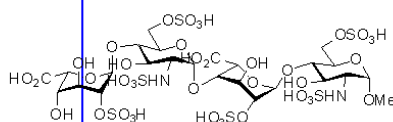

**14**

Chemical Formula:  $C_{25}H_{42}N_2O_{39}S_8$

Exact Mass: 1185.9689

Molecular Weight: 1186.9810

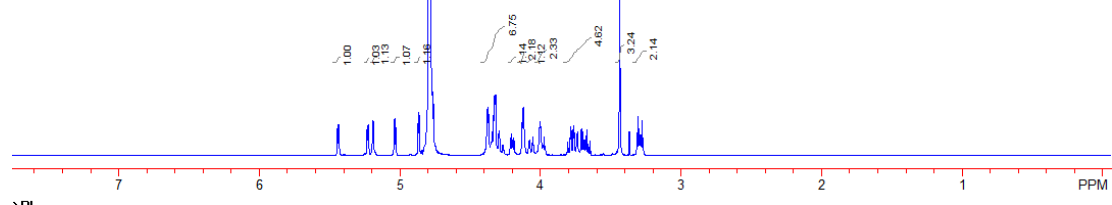

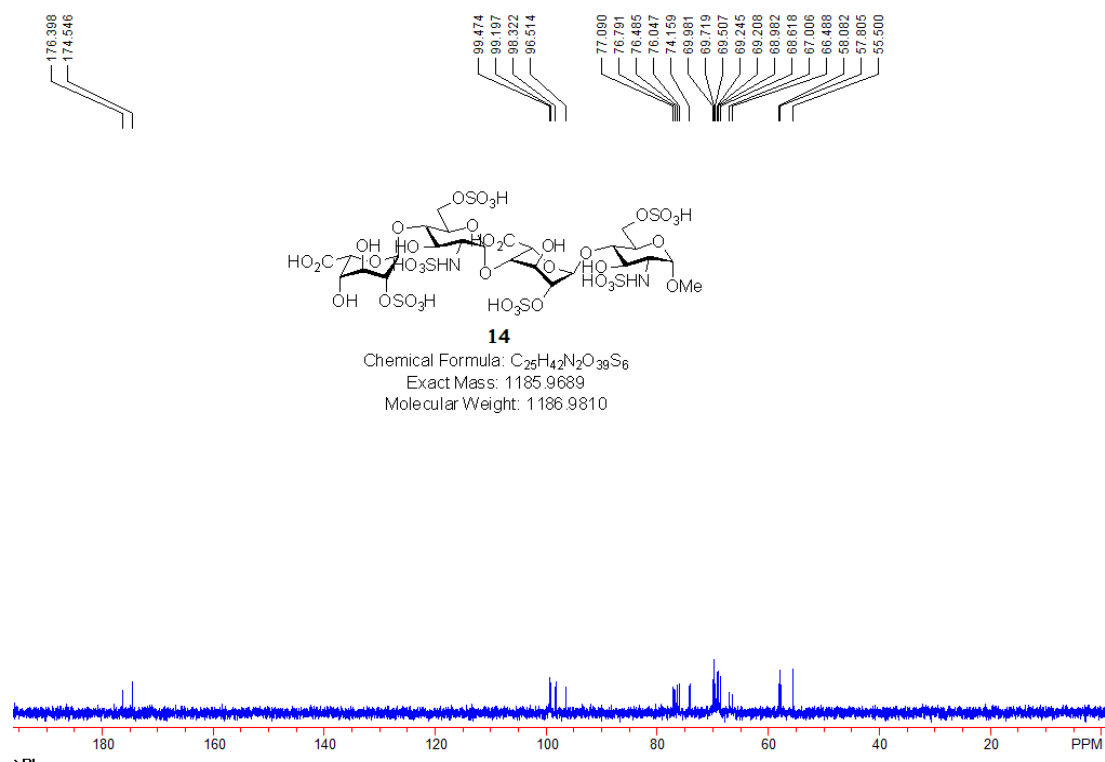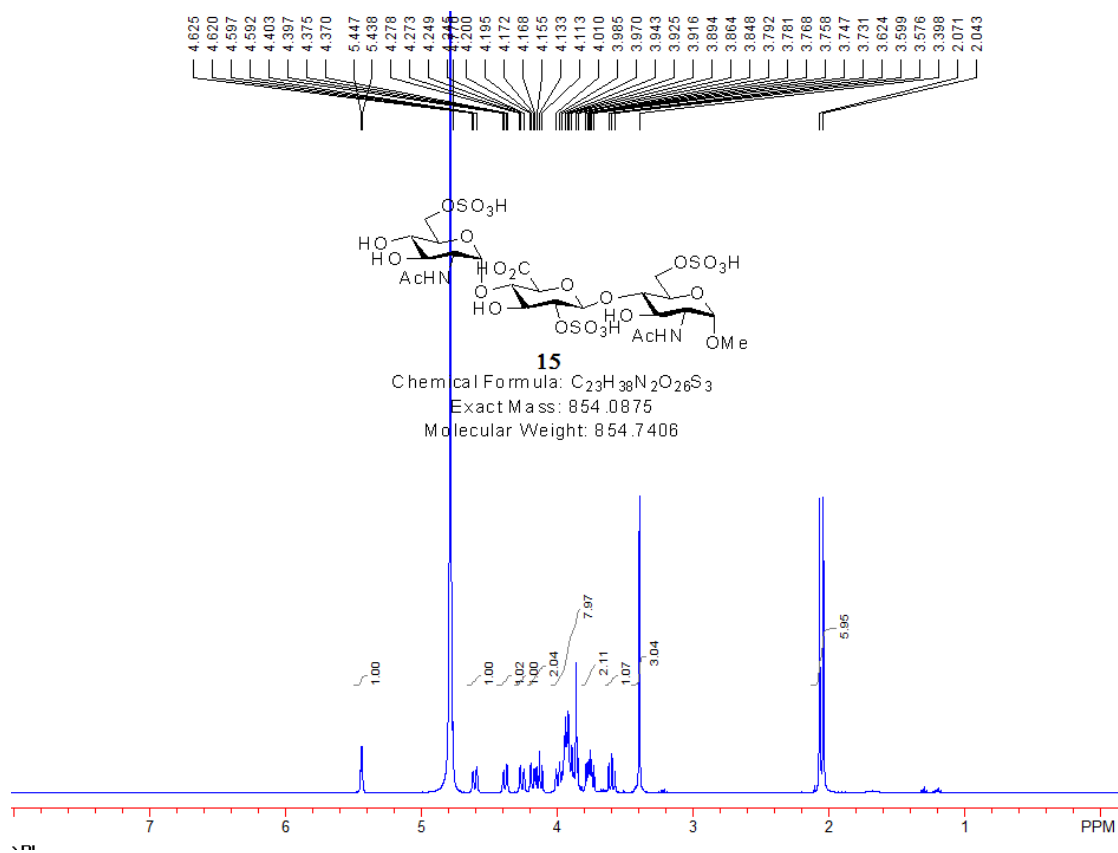

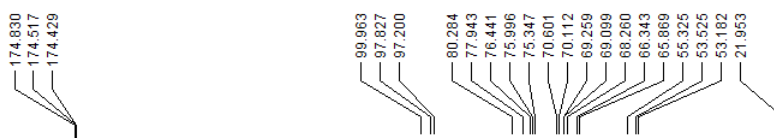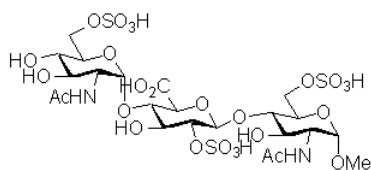

**15**

Chemical Formula:  $C_{23}H_{38}N_2O_{26}S_3$

Exact Mass: 854.0875

Molecular Weight: 854.7406

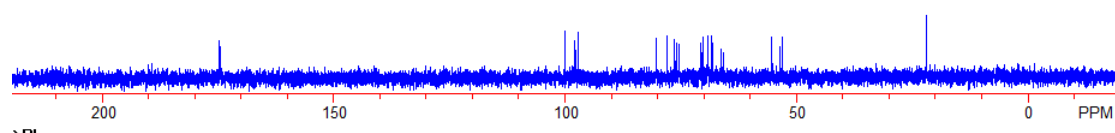

2008112xp13-80cH

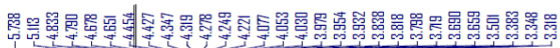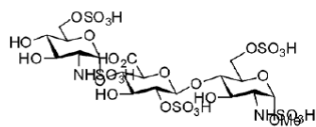

**16**

Chemical Formula:  $C_{19}H_{34}N_2O_{30}S_5$

Exact Mass: 929.9800

Molecular Weight: 930.7937

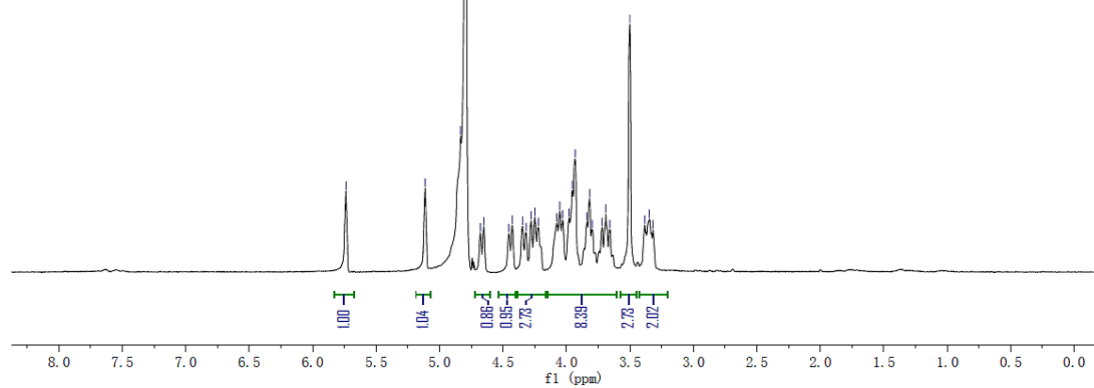

2012年12月

—173.856

100.095  
98.385  
97.822  
79.963  
77.980  
76.488  
75.083  
71.331  
69.988  
68.523  
66.659  
64.465  
57.389  
55.563

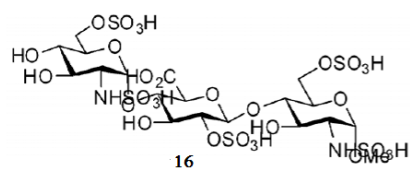

Chemical Formula:  $C_{19}H_{34}N_2O_{30}S_5$   
Exact Mass: 929.9800  
Molecular Weight: 930.7937

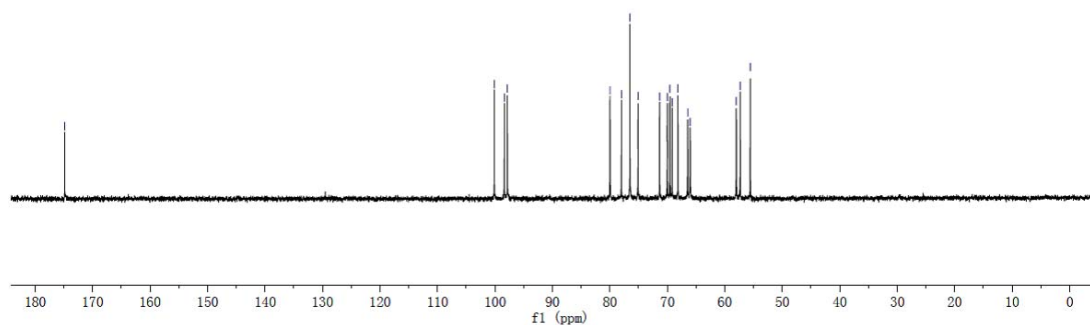

5.425  
5.417  
4.583  
4.564  
4.362  
4.177  
4.151  
4.014  
3.990  
3.926  
3.899  
3.841  
3.810  
3.778  
3.756  
3.730  
3.708  
3.589  
3.565  
3.542  
3.386  
3.341  
2.046  
2.020

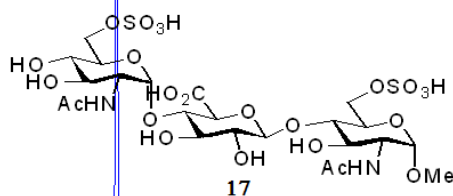

Chemical Formula:  $C_{23}H_{38}N_2O_{23}S_2$   
Exact Mass: 774.1307  
Molecular Weight: 774.6774

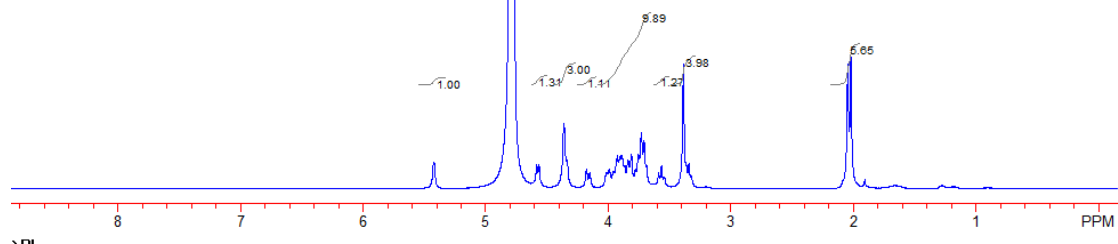

174.910  
174.568  
174.517

97.885  
102.289  
97.025

78.745  
76.616  
76.529  
75.909  
73.714  
70.725  
70.171  
69.631  
69.252  
68.472  
66.503  
55.486  
53.641  
53.262

22.092  
22.033

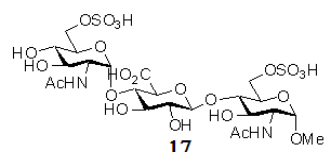

Chemical Formula:  $C_{23}H_{38}N_2O_{23}S_2$

Exact Mass: 774.1307

Molecular Weight: 774.6774

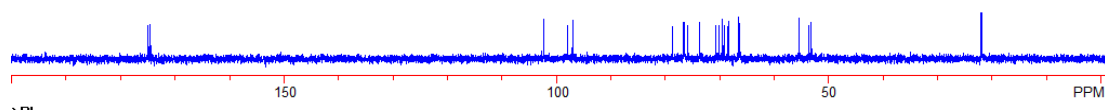

2006118-8-97

5.661  
5.672

5.074  
5.065

4.790  
4.640

4.620  
4.430  
4.402  
4.388  
4.375  
4.348

4.219  
4.182  
4.016  
3.977

3.886  
3.874  
3.852  
3.842  
3.820  
3.798

3.736  
3.722  
3.672  
3.649  
3.626  
3.603

3.580  
3.458  
3.430  
3.409  
3.388  
3.344

3.334  
3.312  
3.298  
3.278

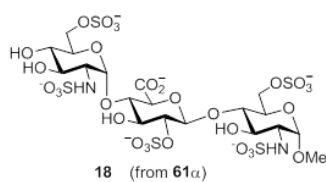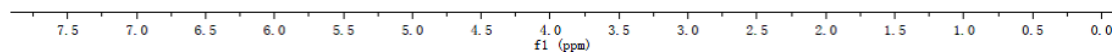

2006118-8-97C

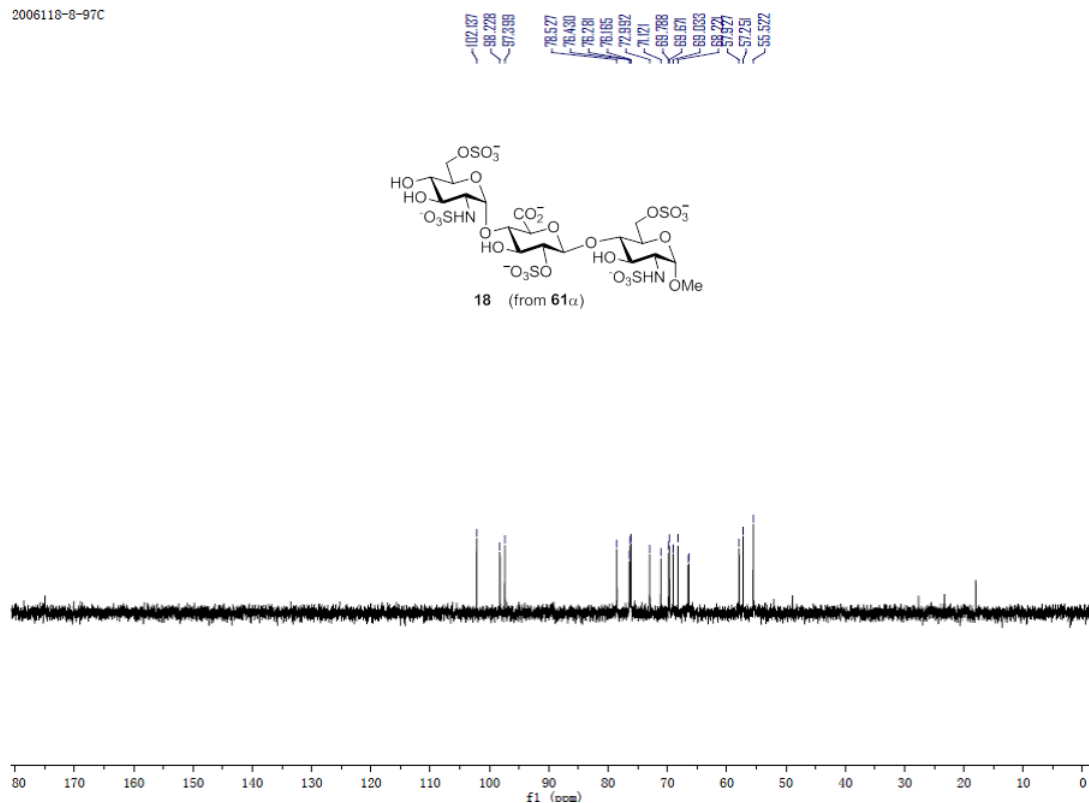

2008112xp10-9hhh

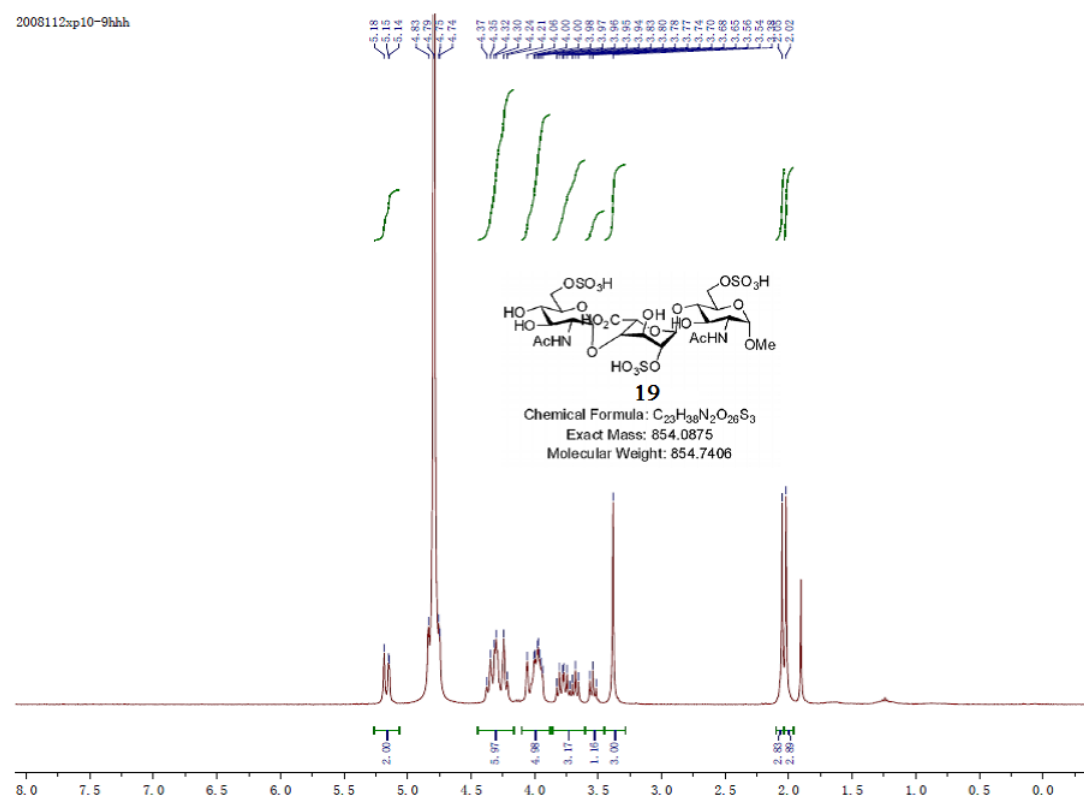

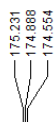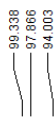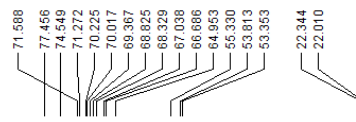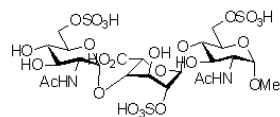

**19**

Chemical Formula:  $C_{23}H_{38}N_2O_{26}S_3$

Exact Mass: 854.0875

Molecular Weight: 854.7406

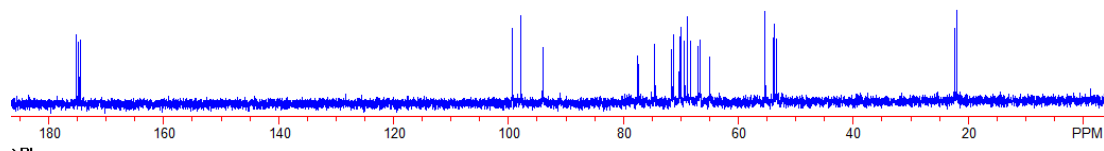

2006112xp10-10h

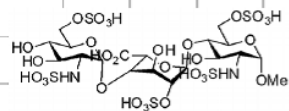

**20**

Chemical Formula:  $C_{19}H_{34}N_2O_{30}S_5$

Exact Mass: 929.9800

Molecular Weight: 930.7937

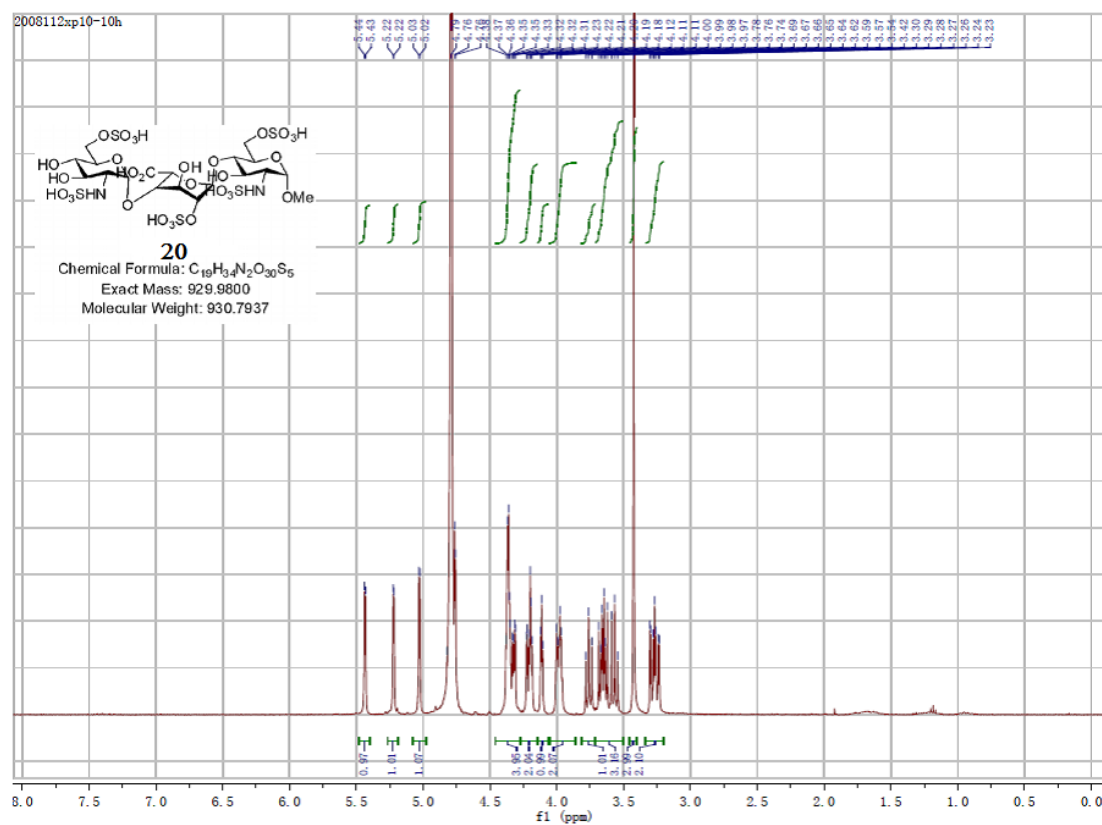

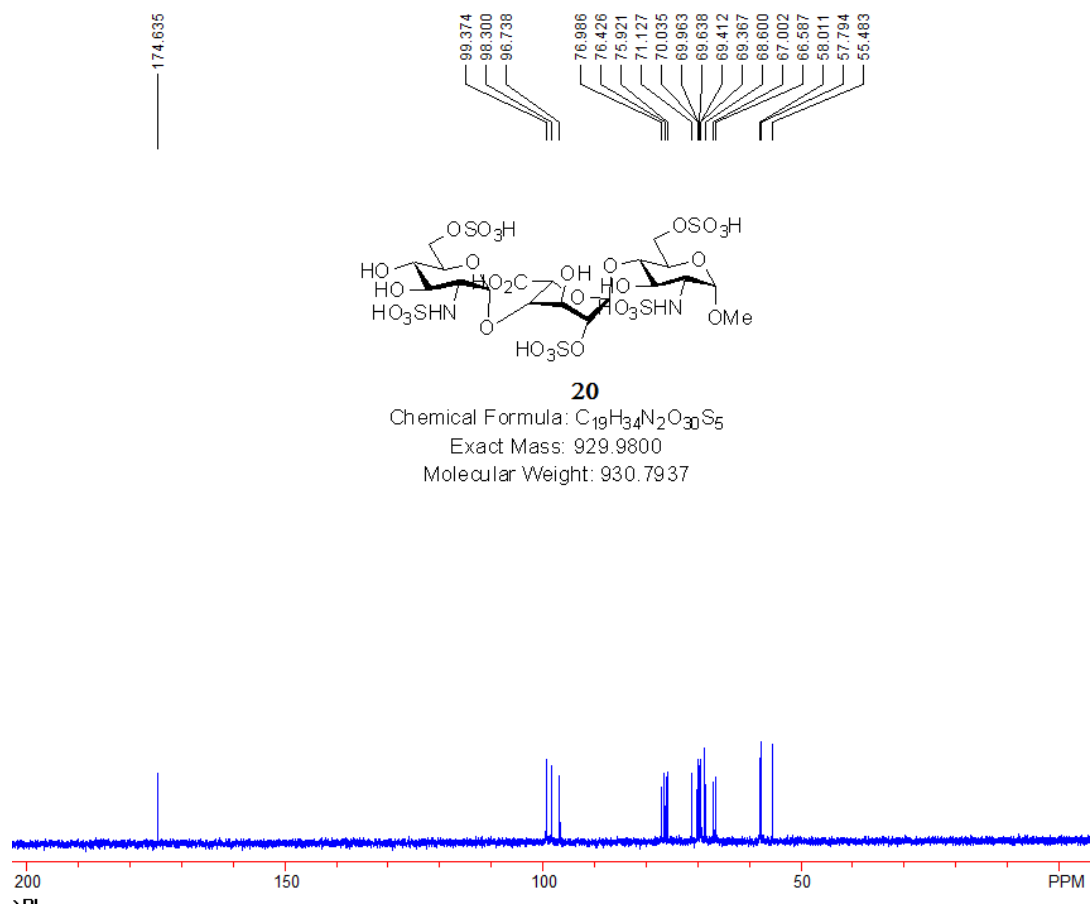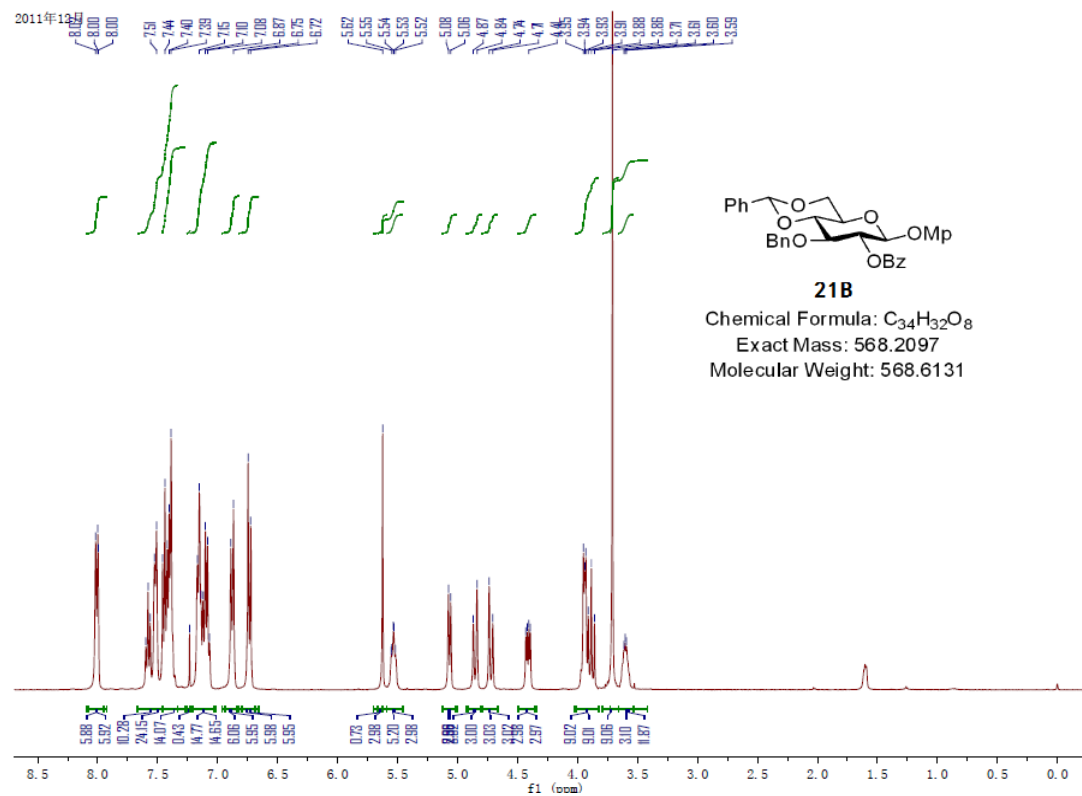

2011年12月

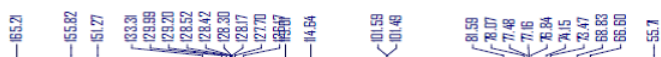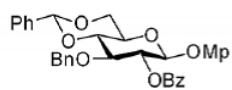

**21B**

Chemical Formula:  $C_{34}H_{32}O_8$

Exact Mass: 568.2097

Molecular Weight: 568.6131

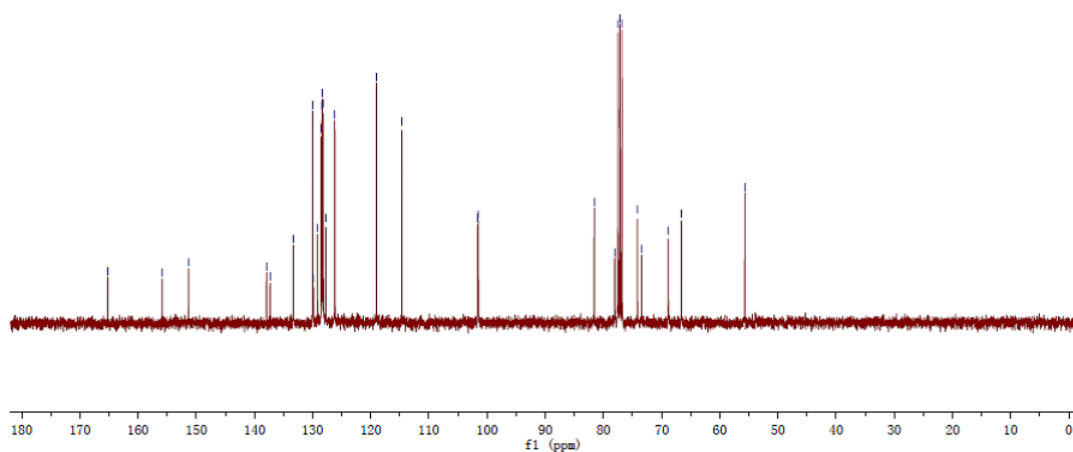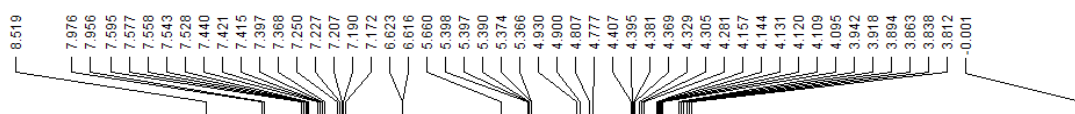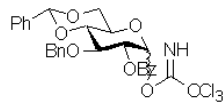

**21**

Chemical Formula:  $C_{29}H_{26}Cl_3NO_7$

Exact Mass: 605.08

Molecular Weight: 606.88

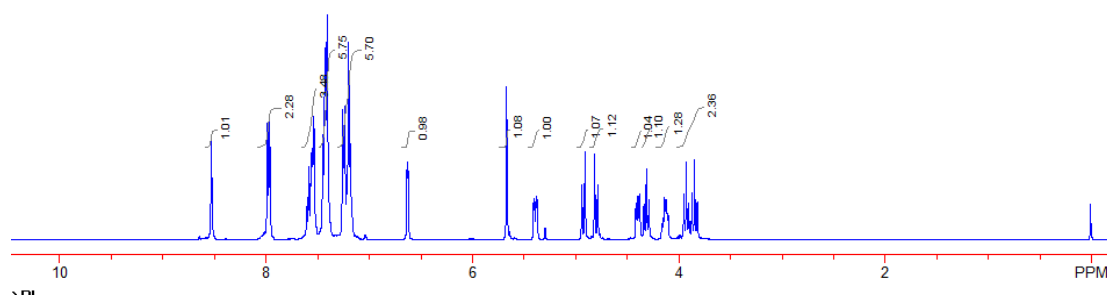

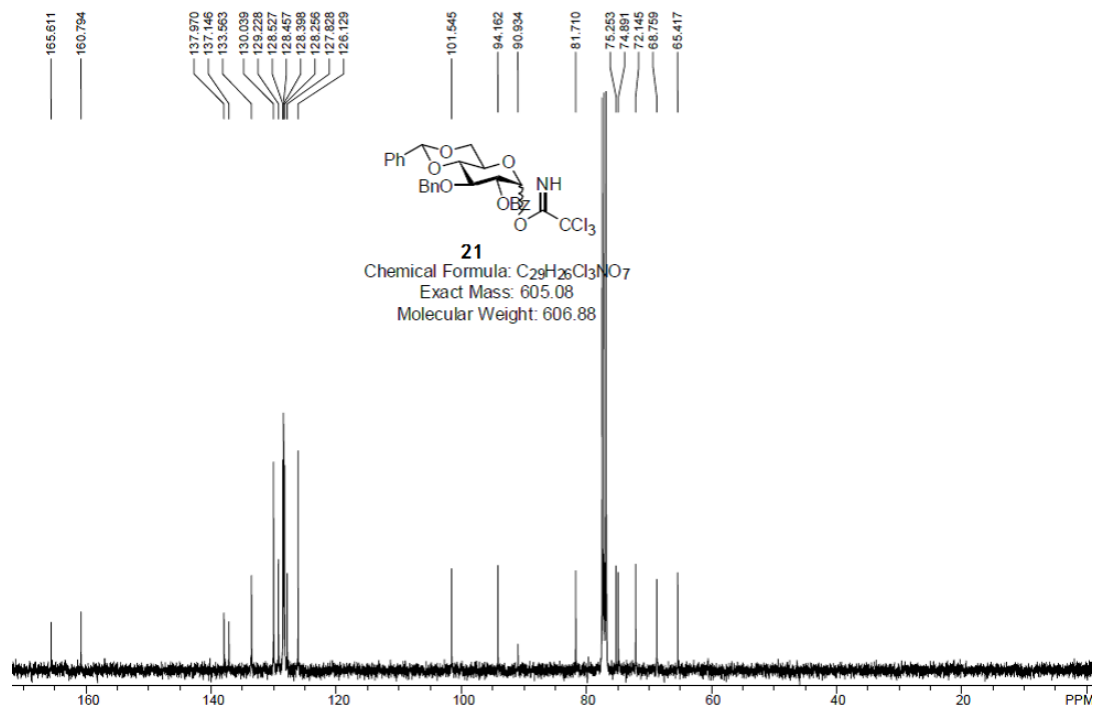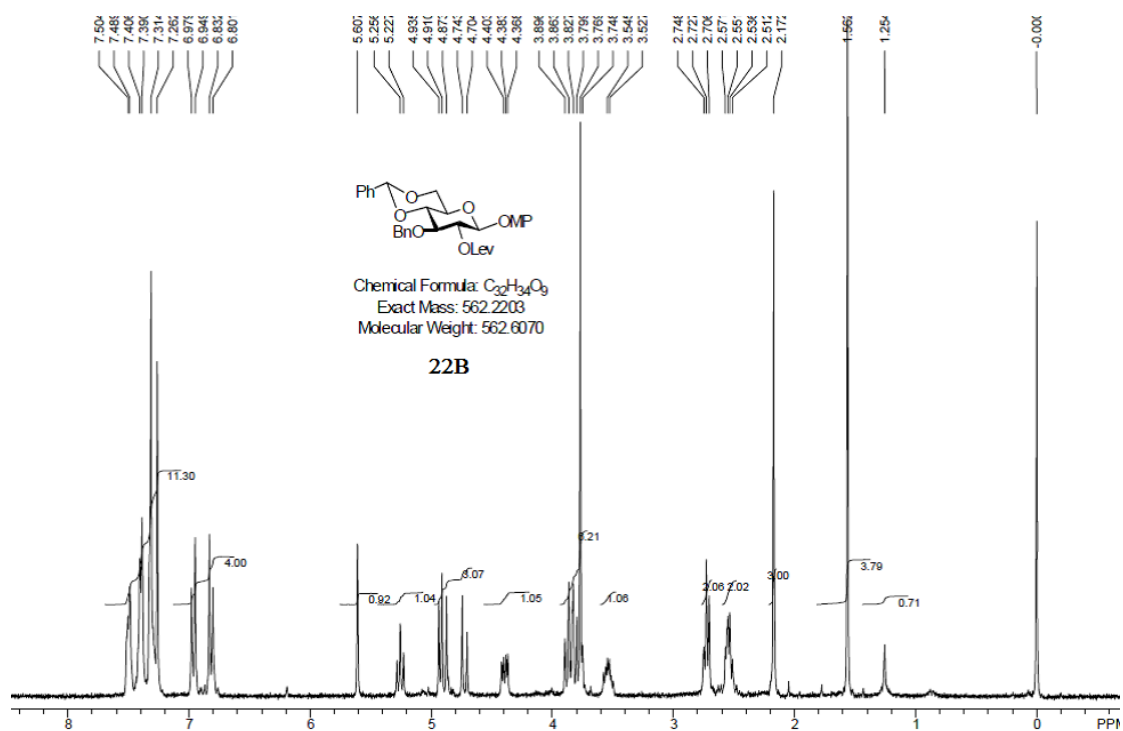

2006118-77C

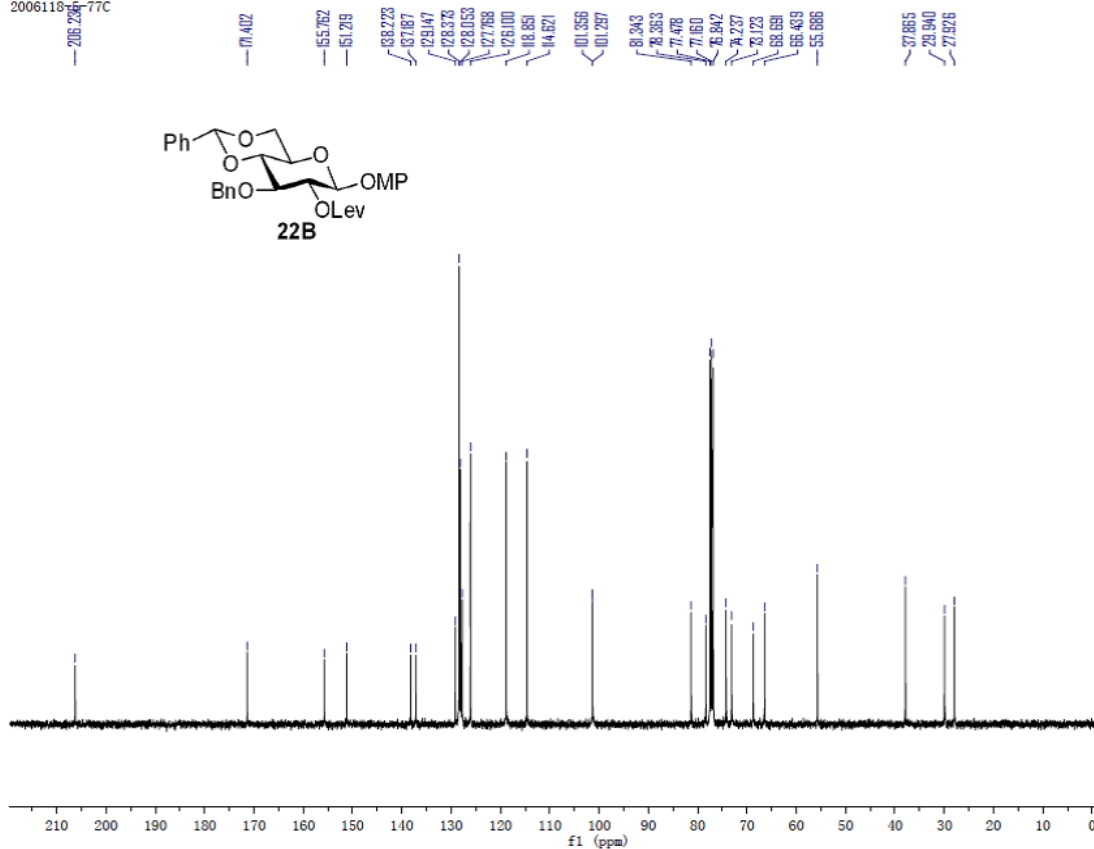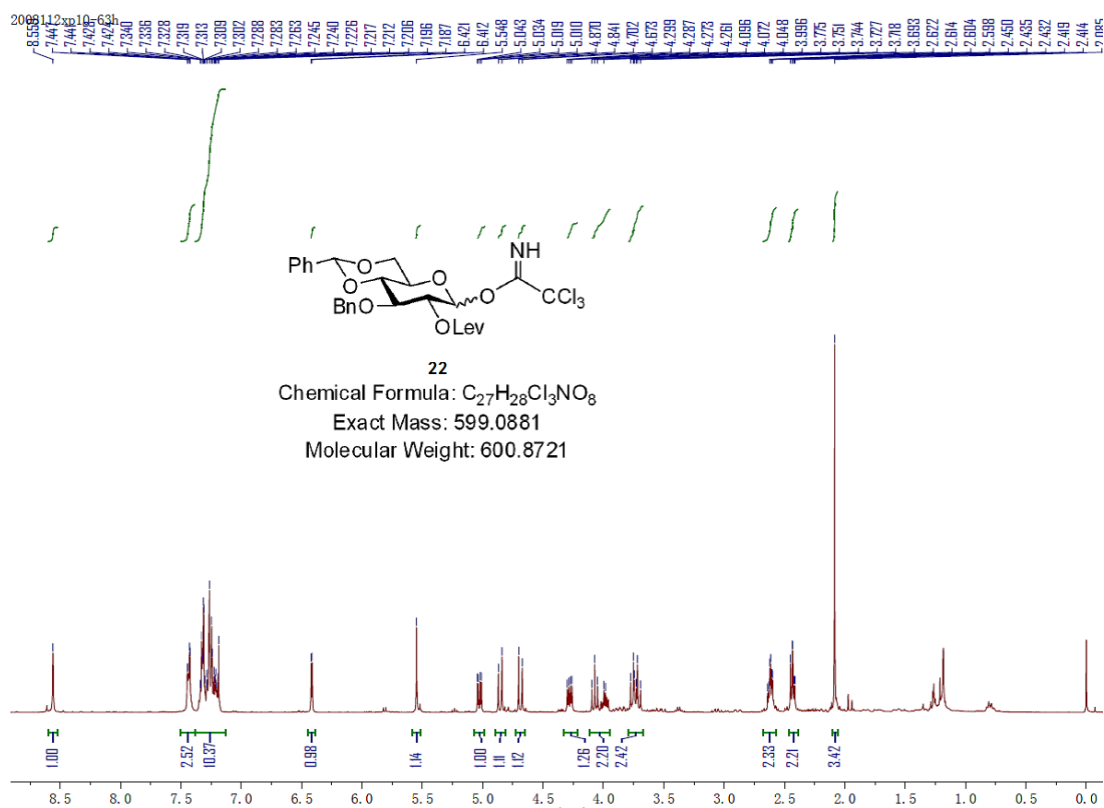

20081124 10-63h

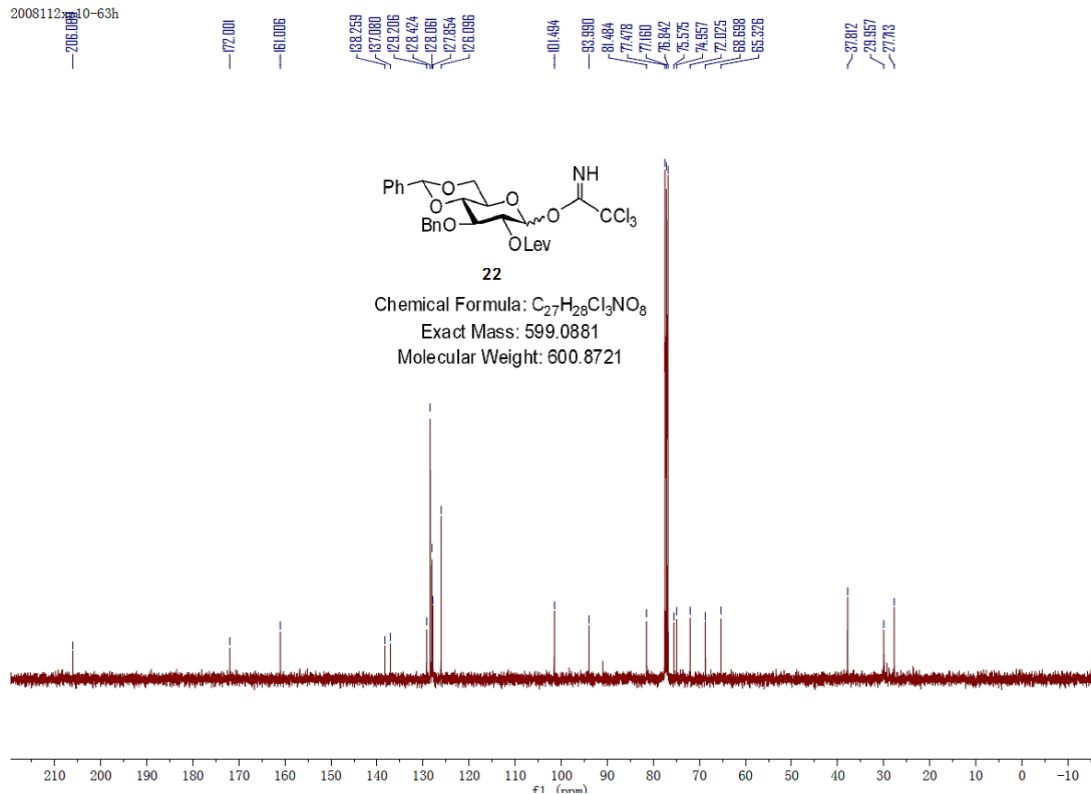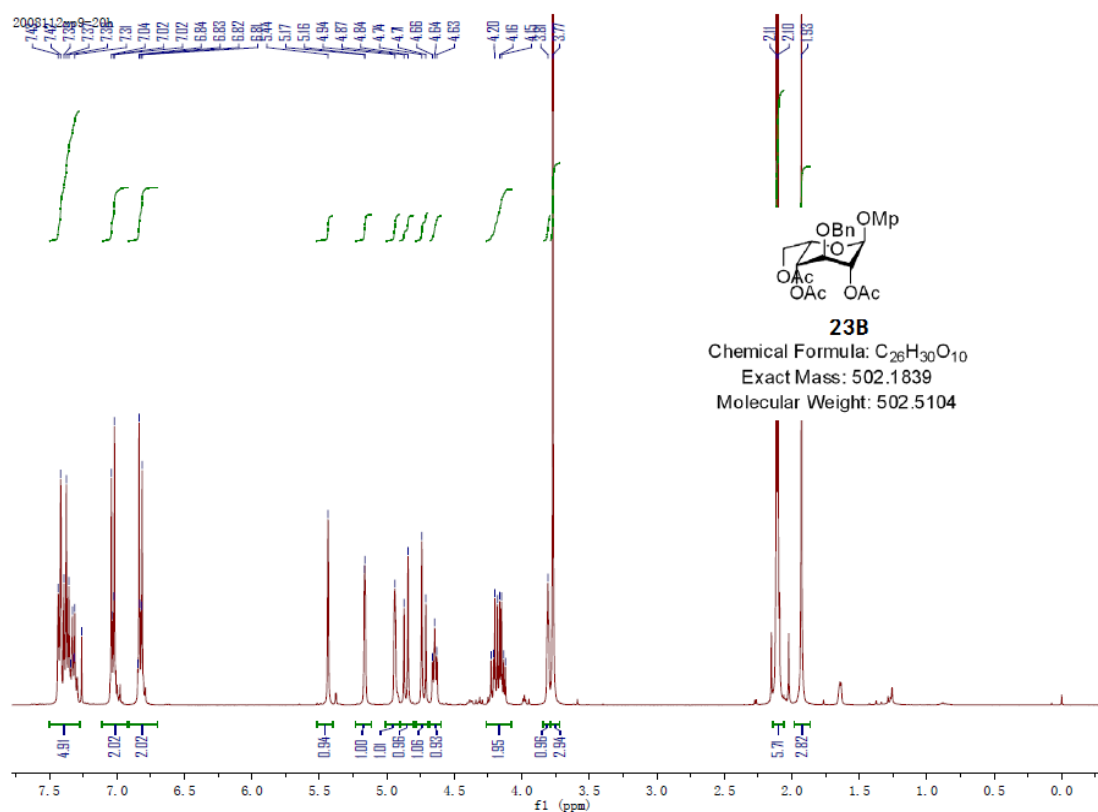

2011年12月

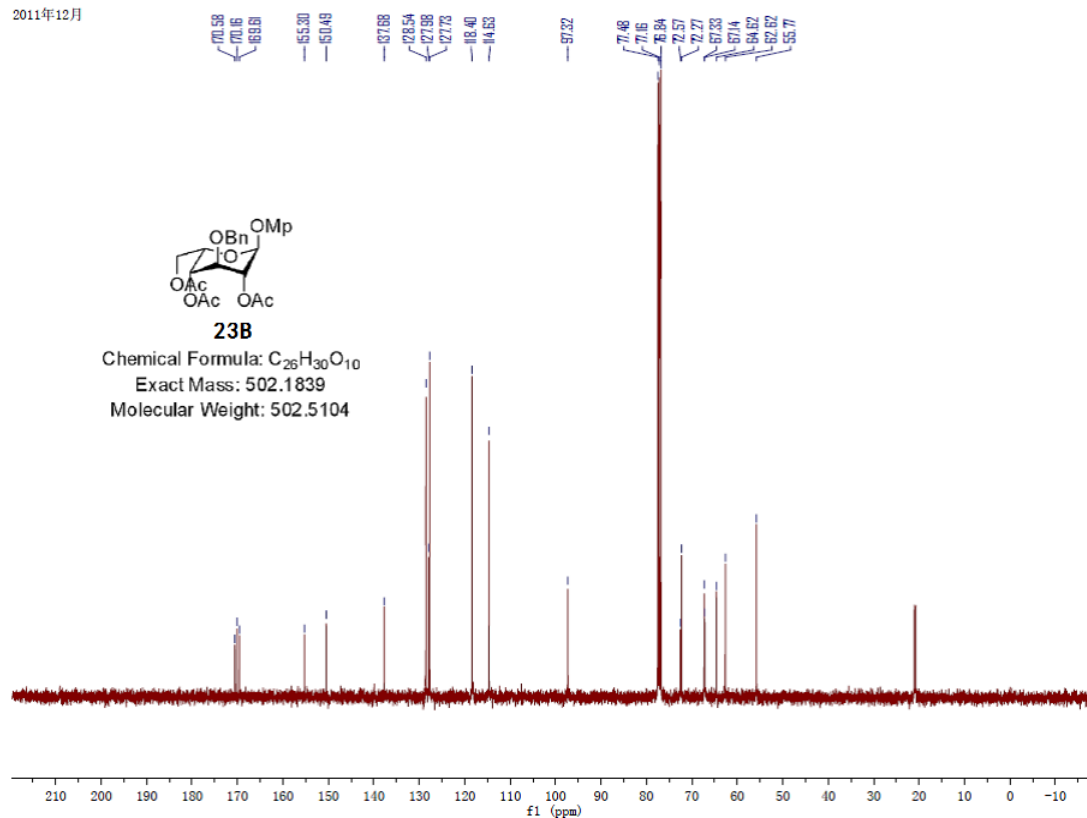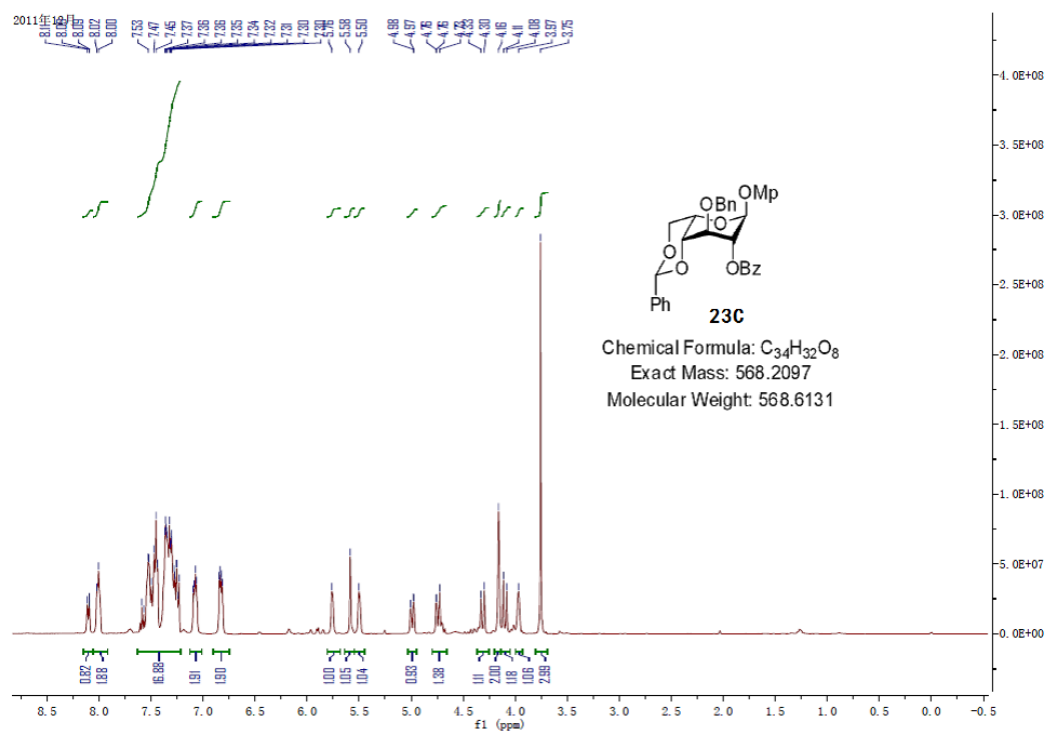

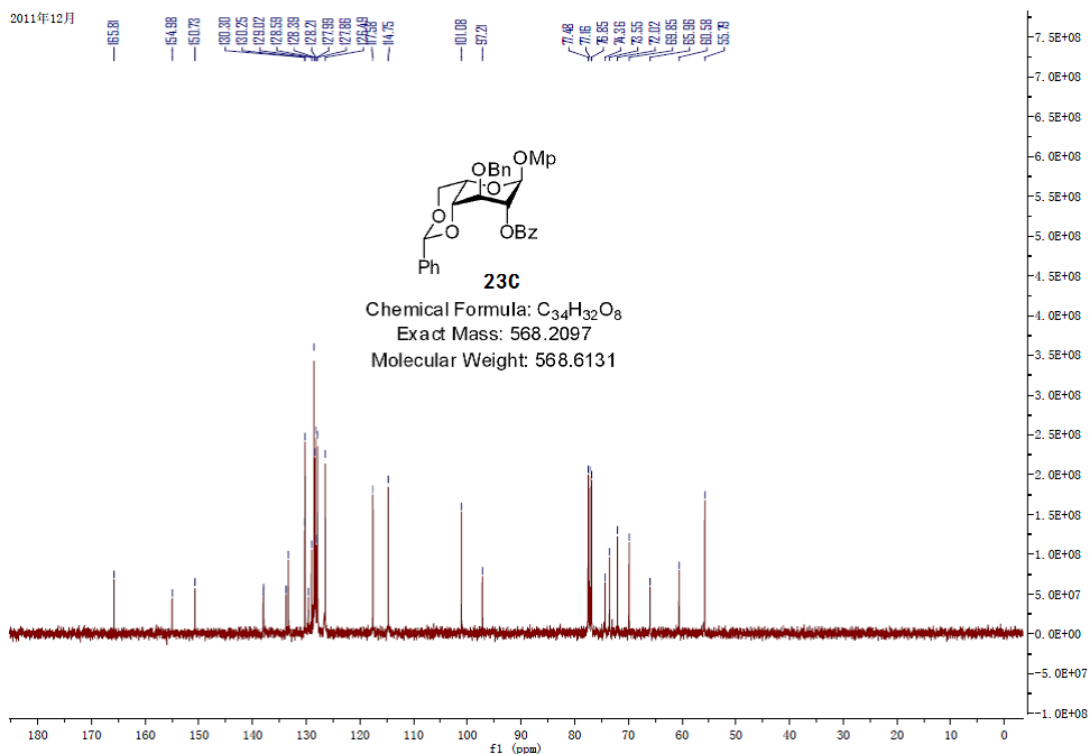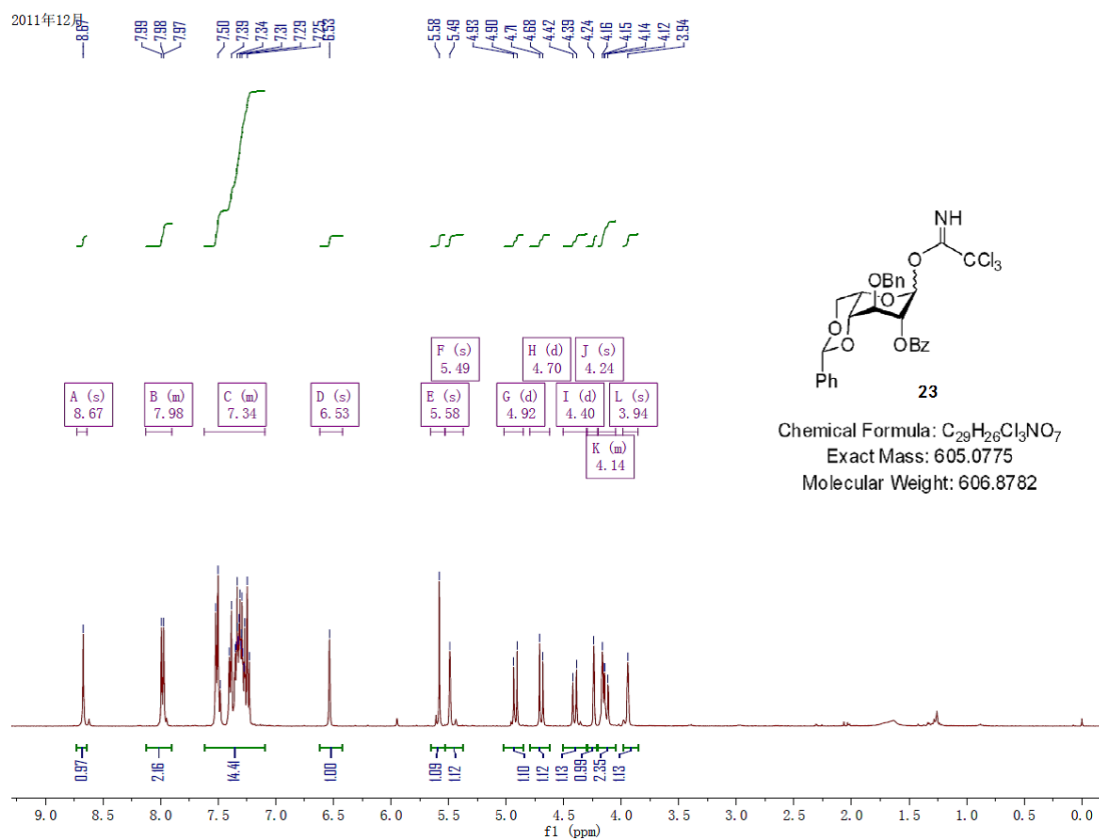

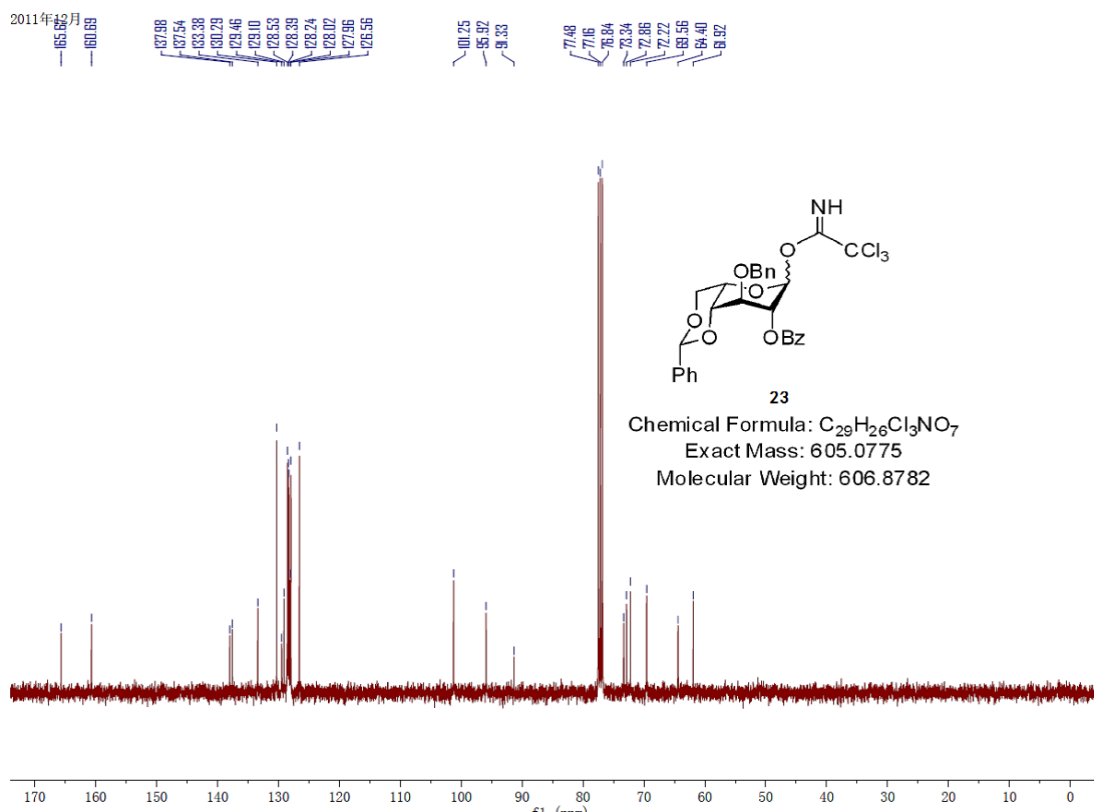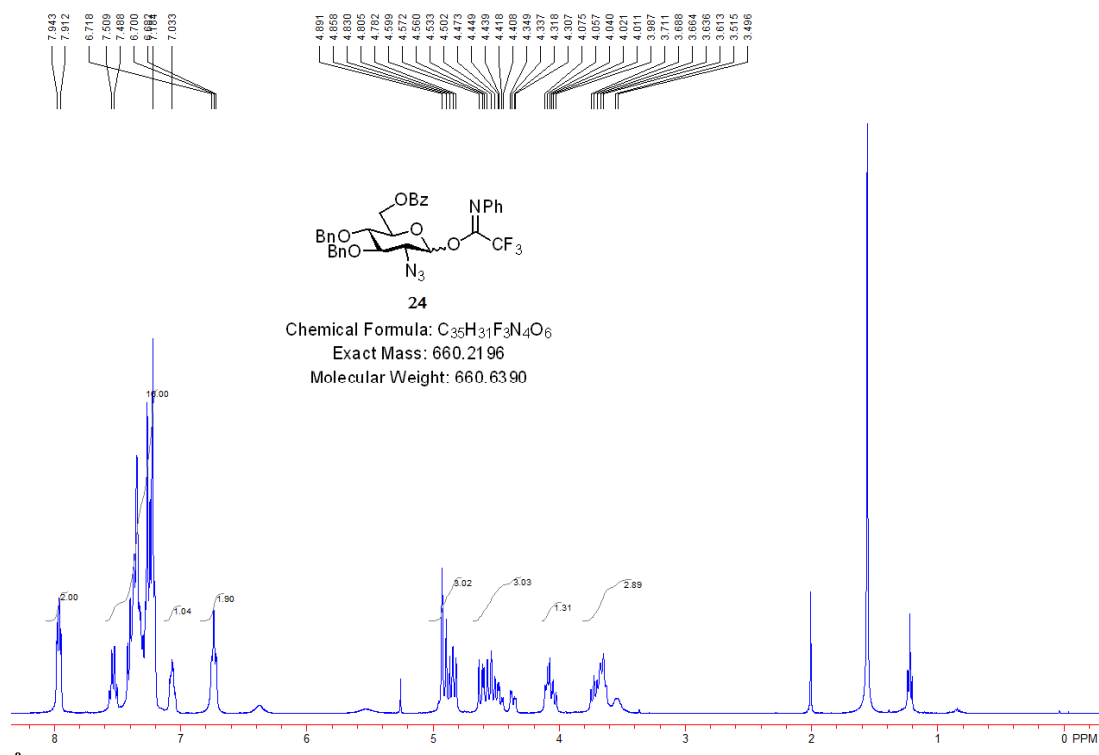

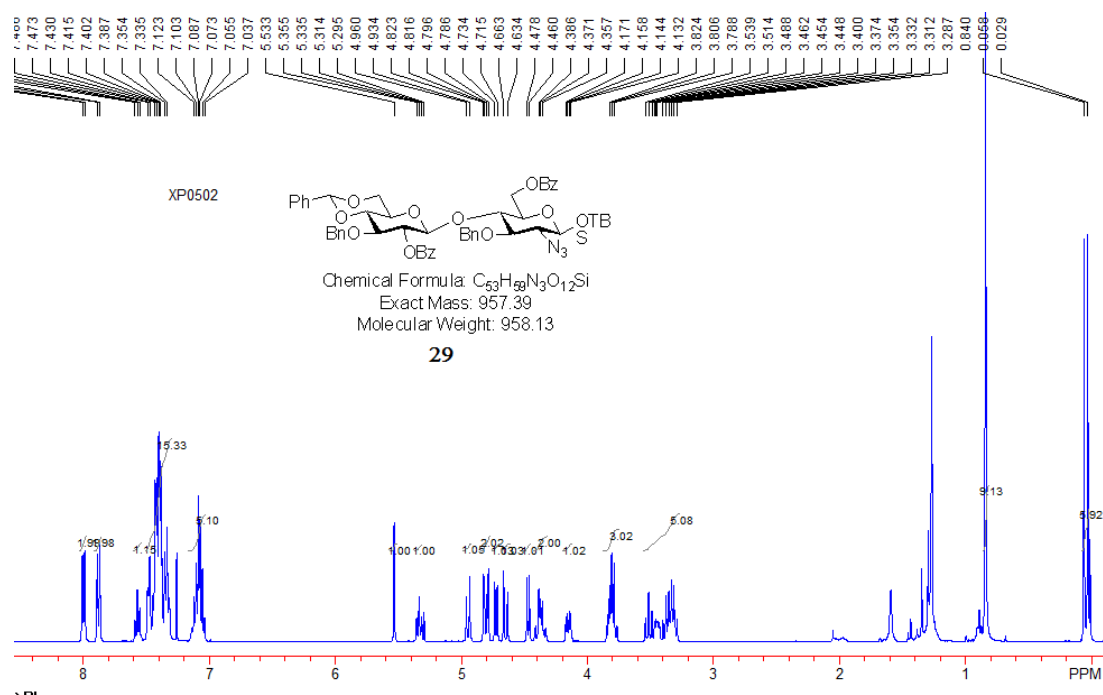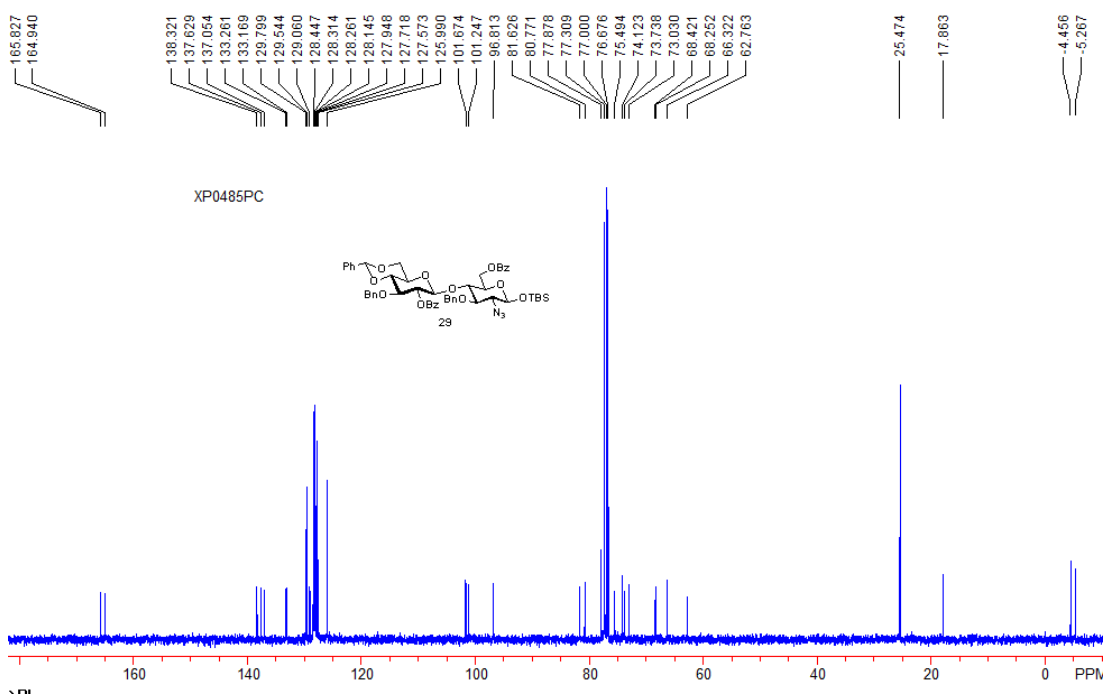

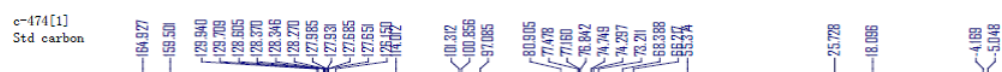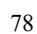

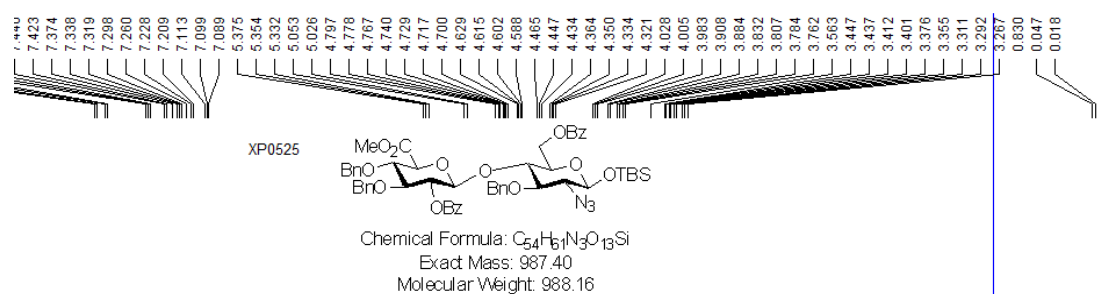

31

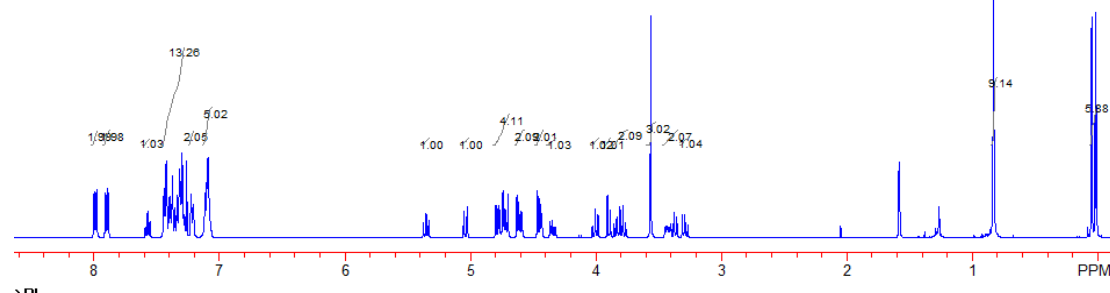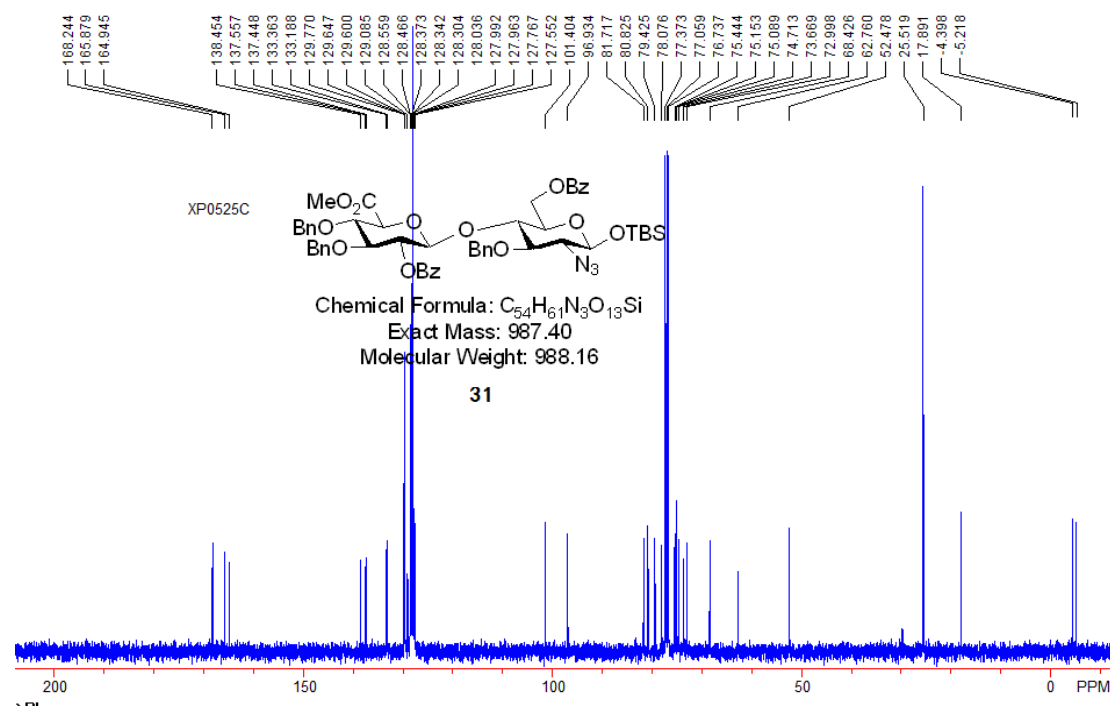

31

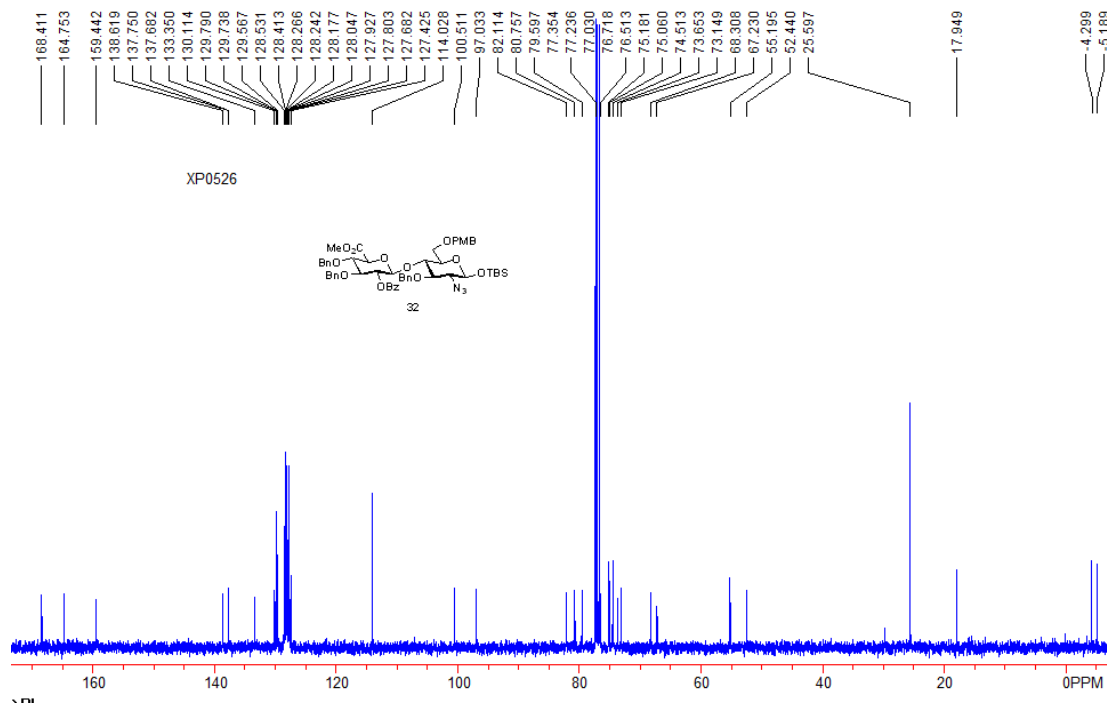

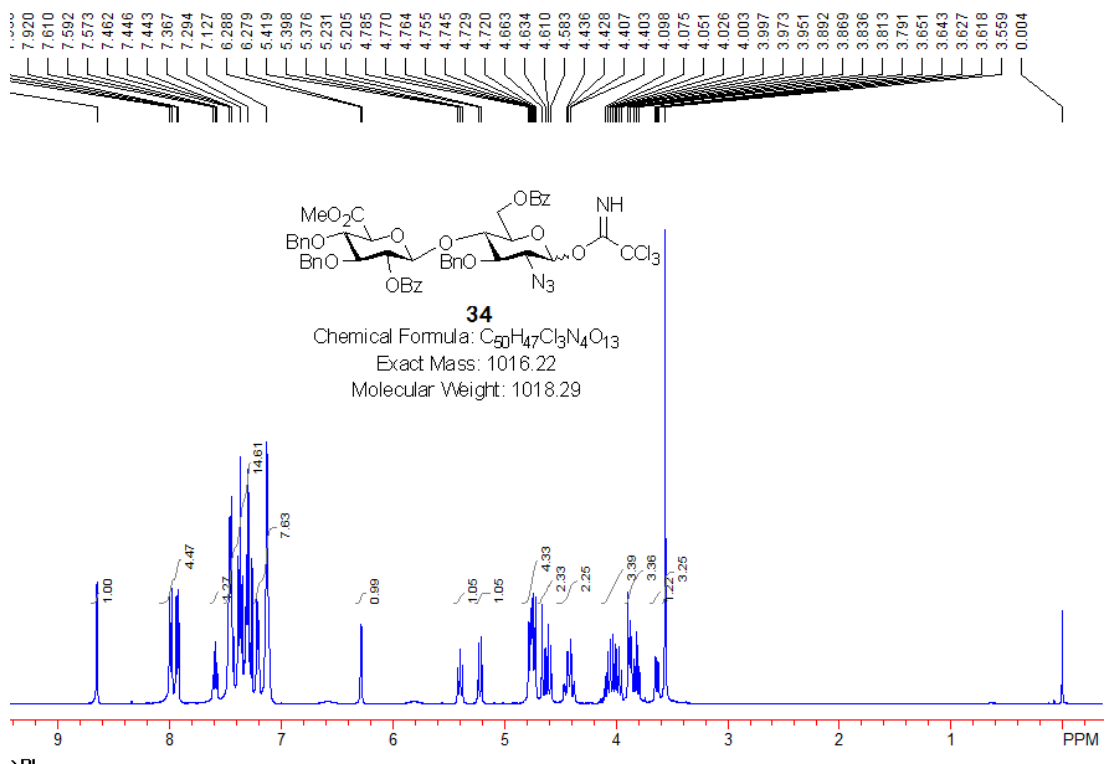

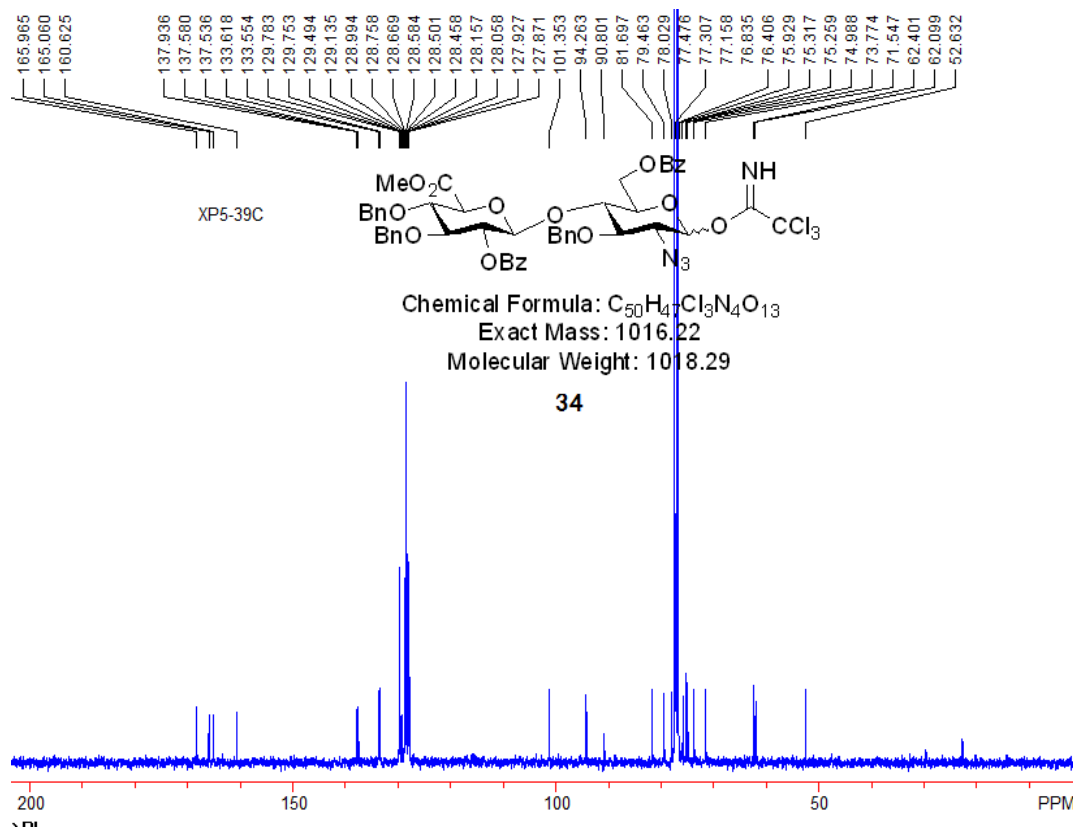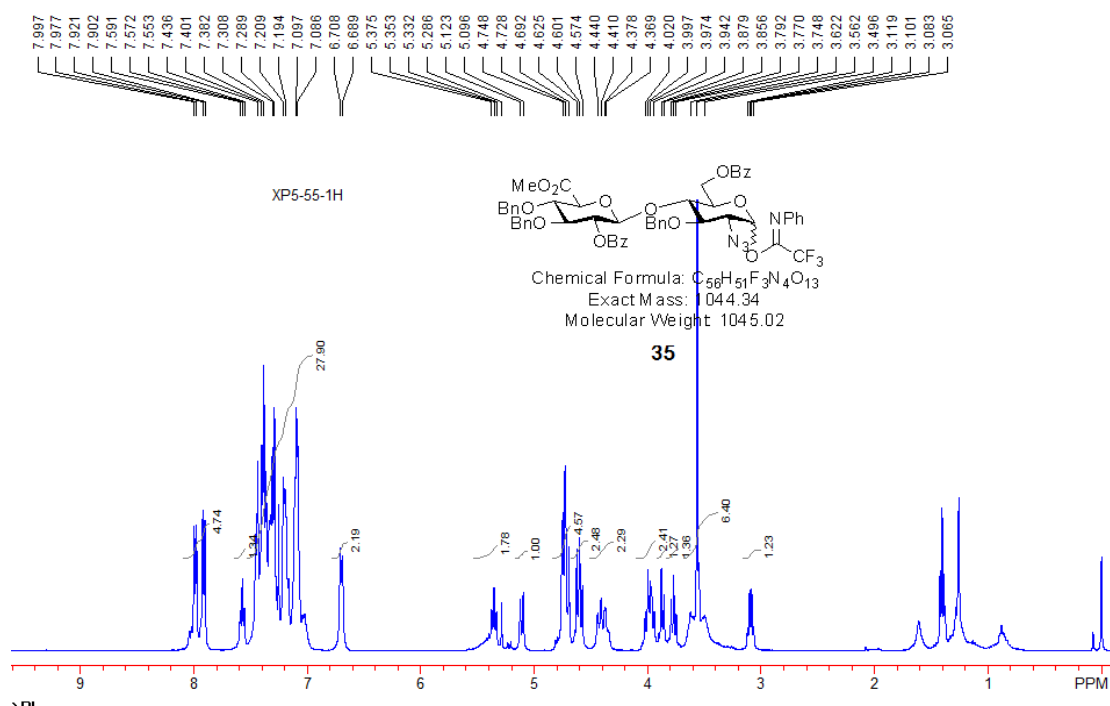

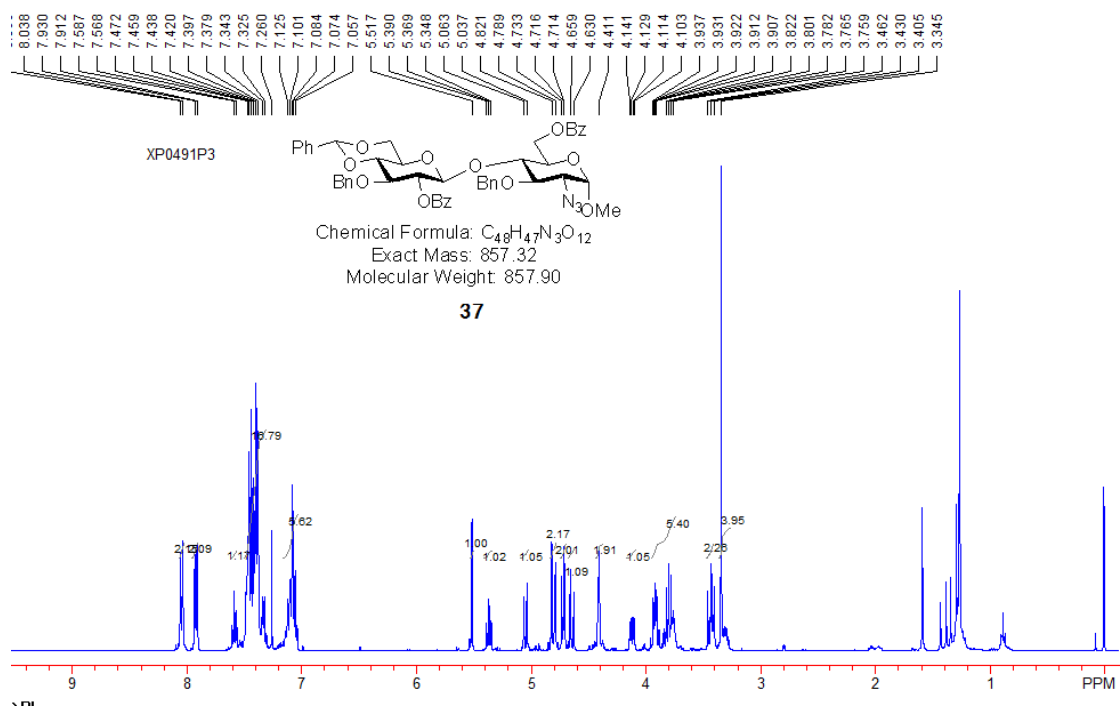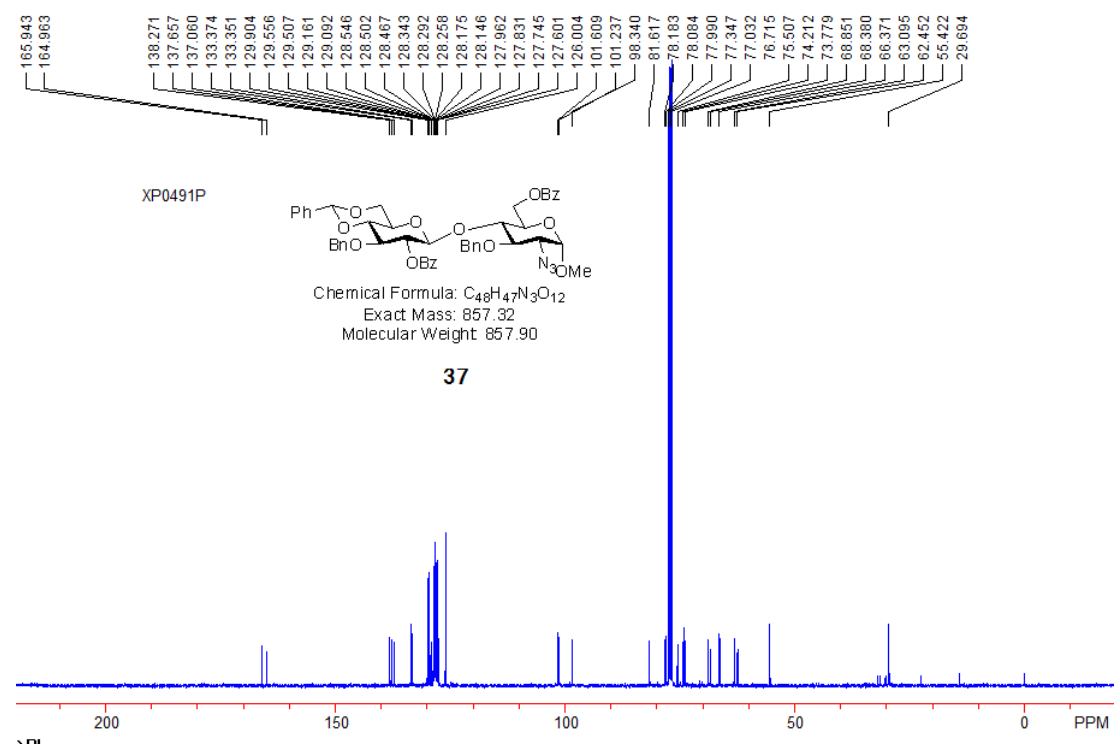

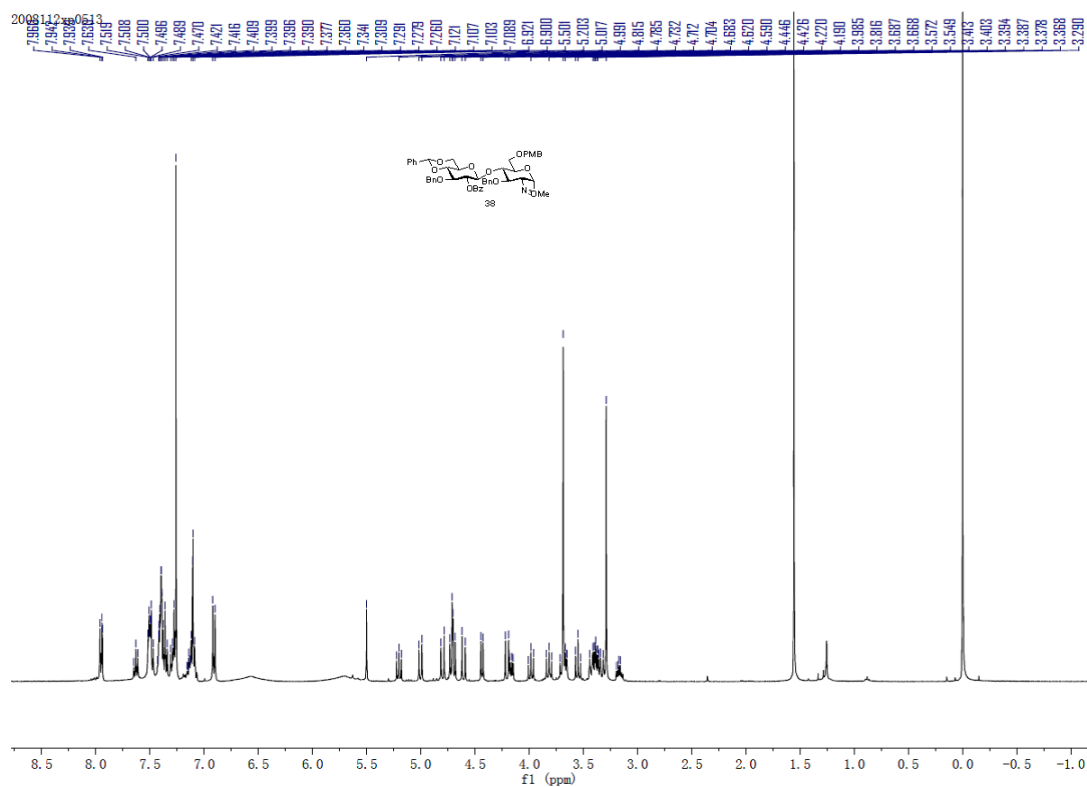

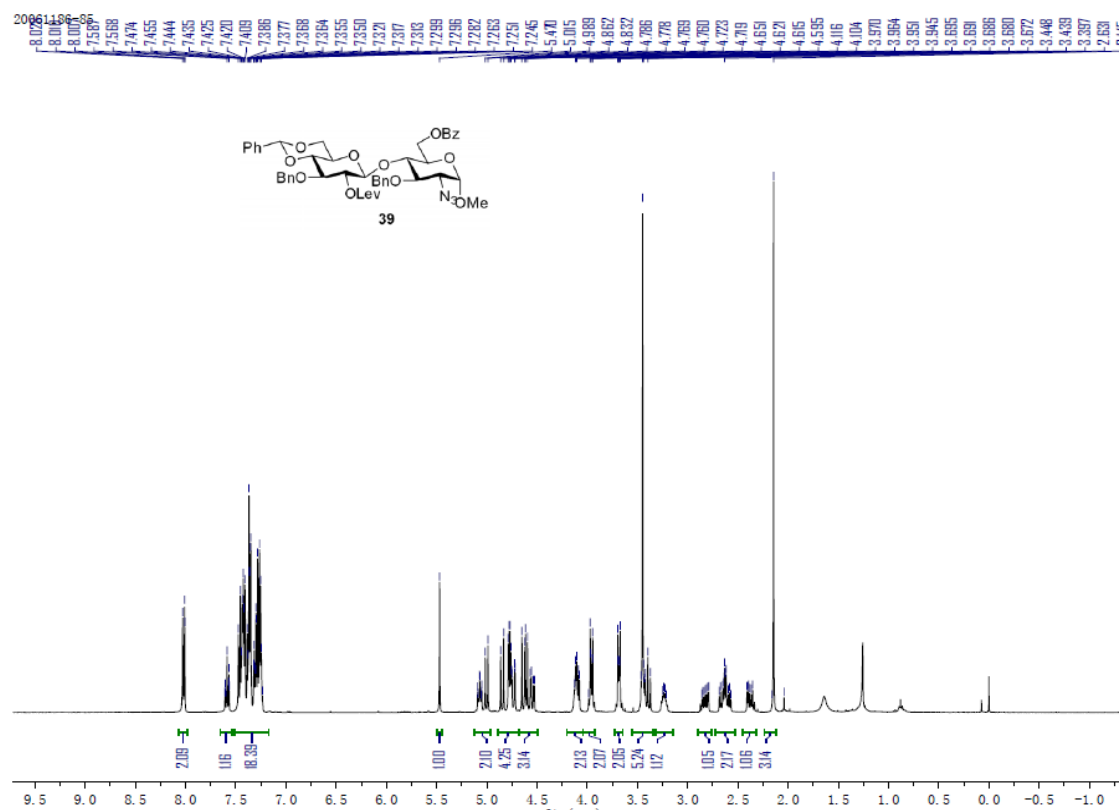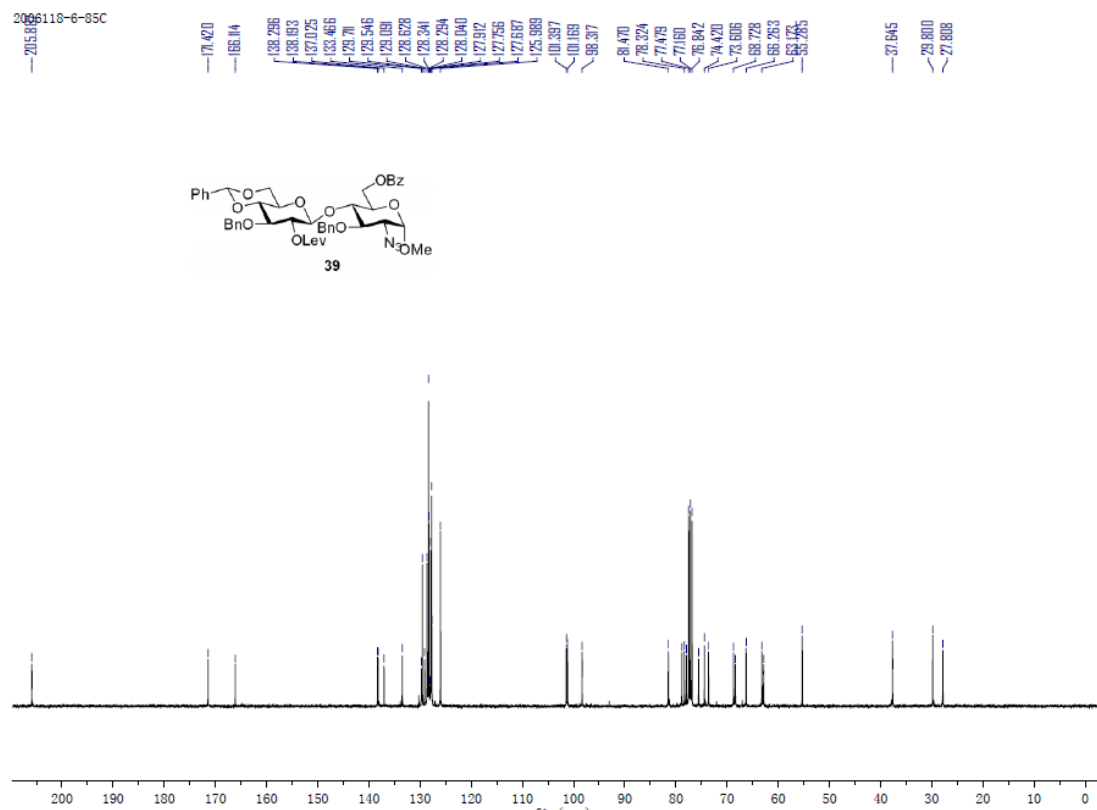



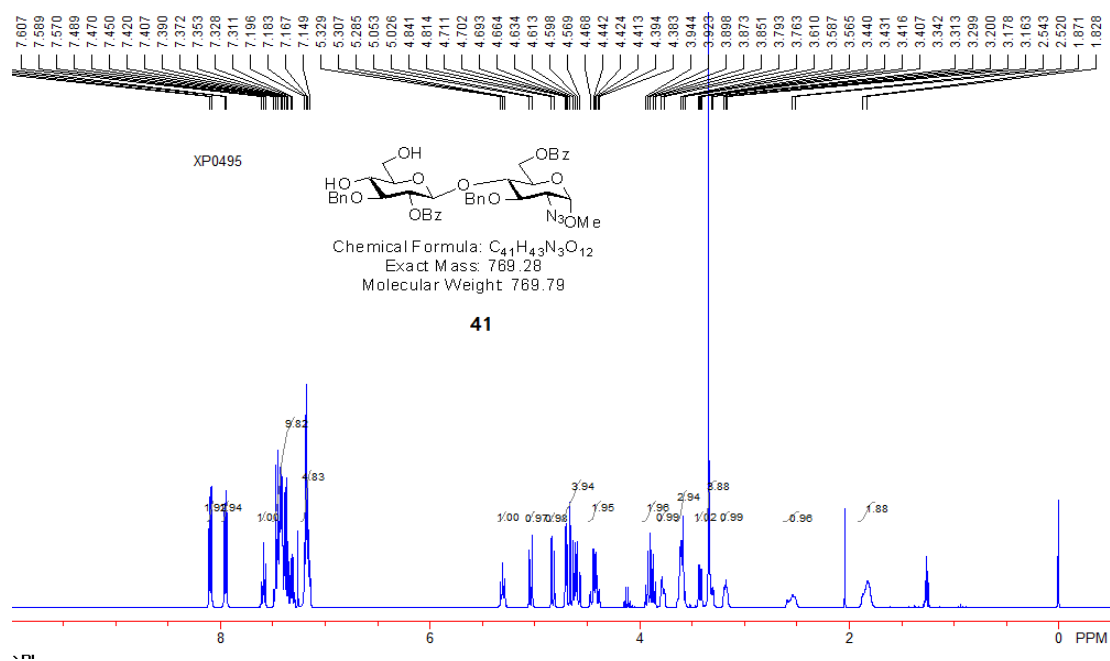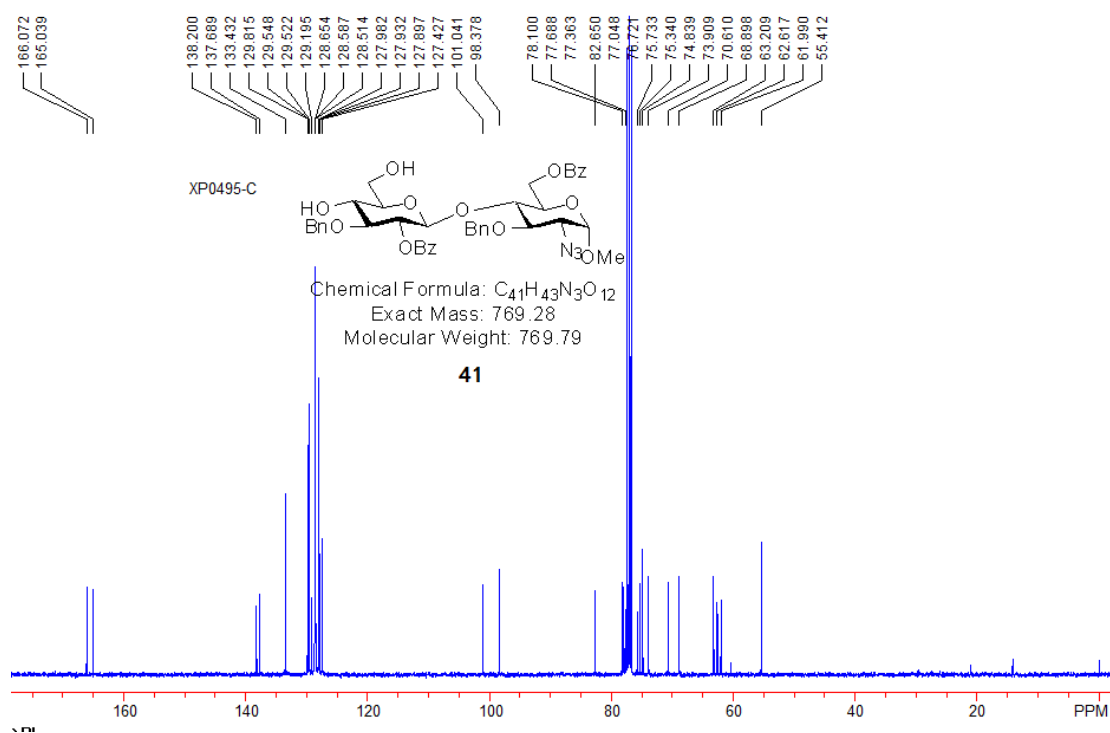

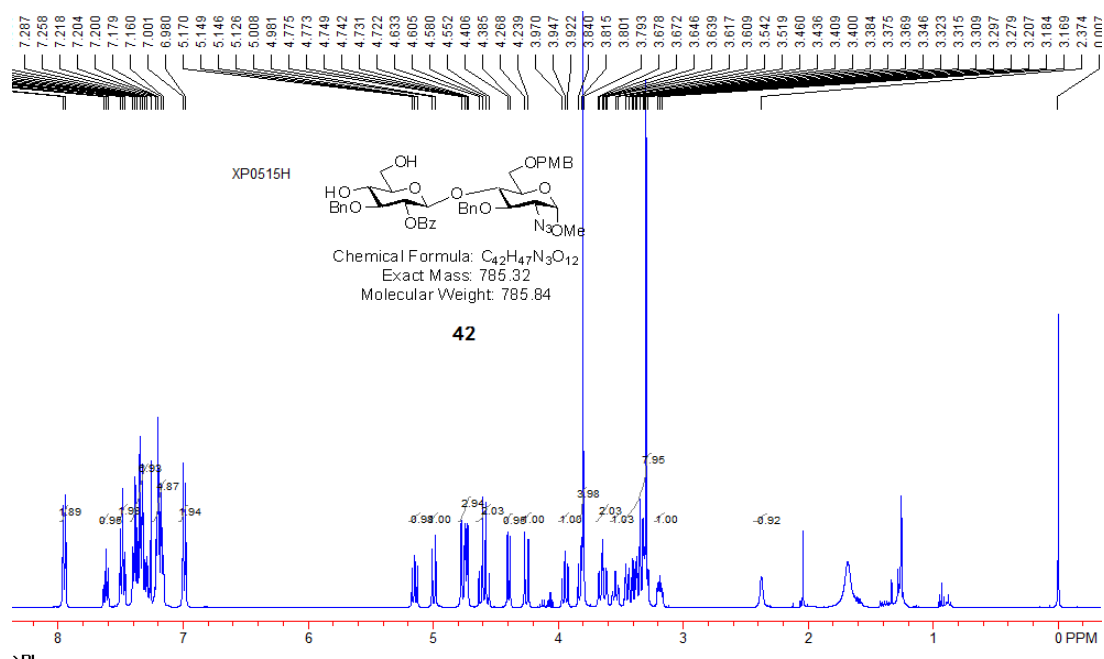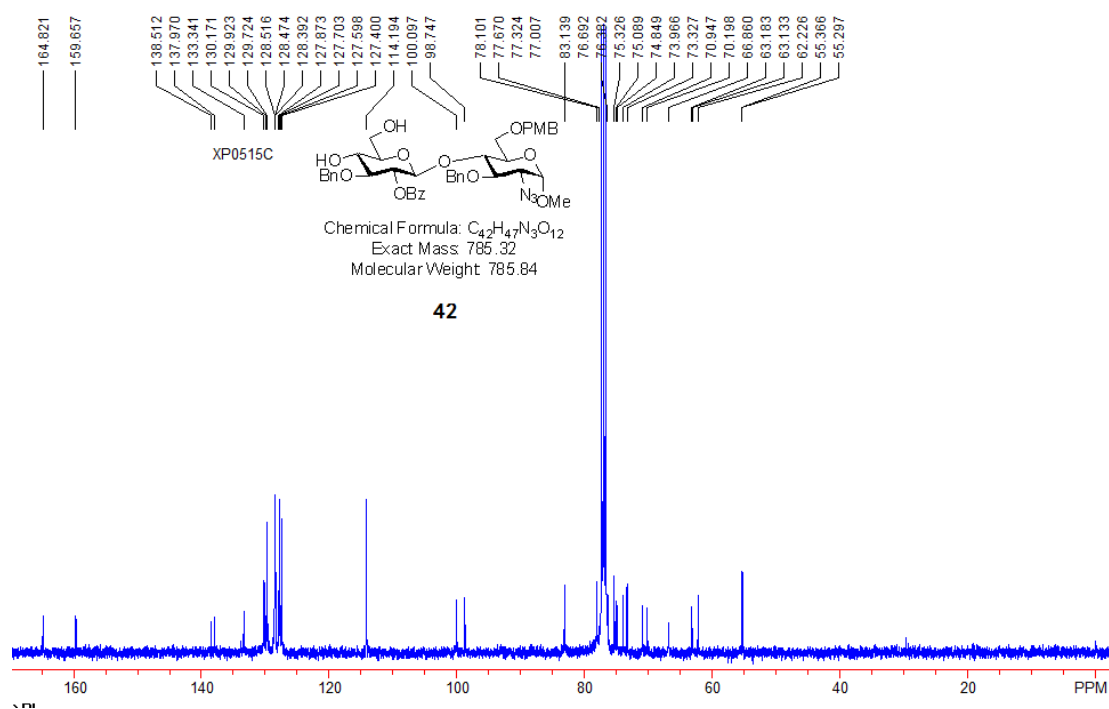

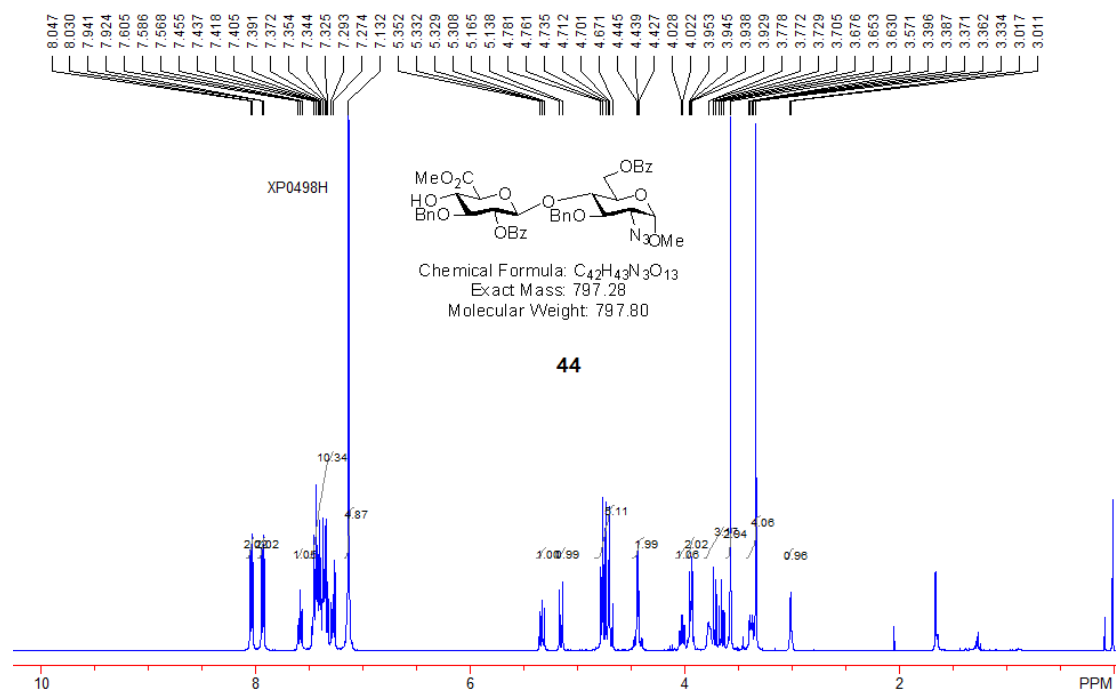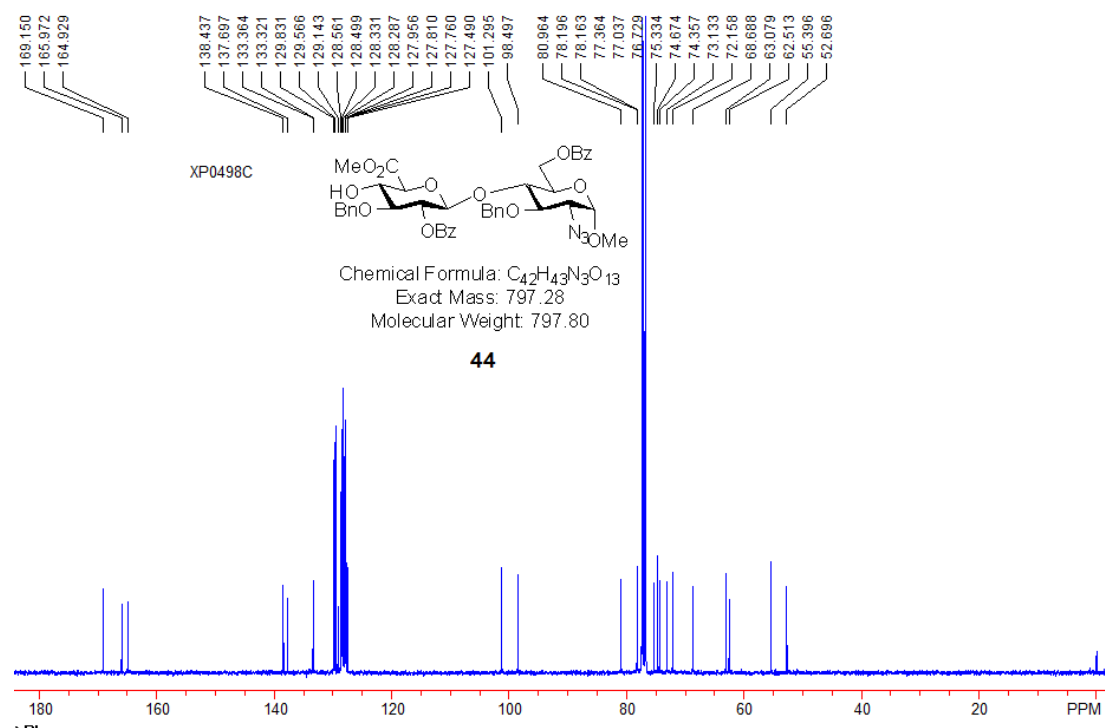

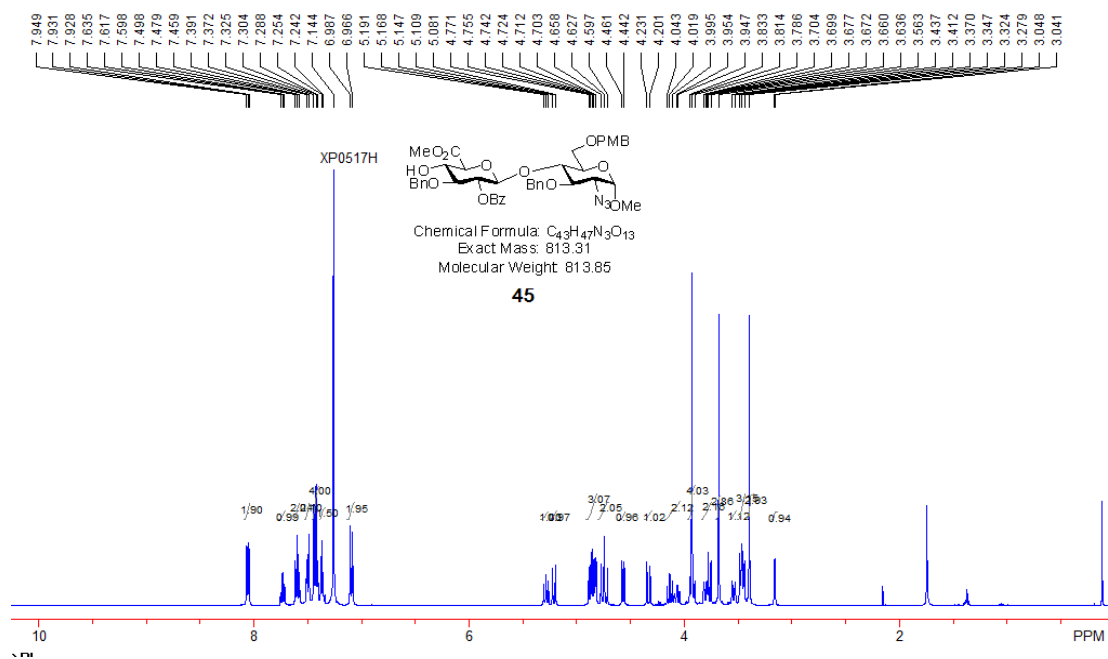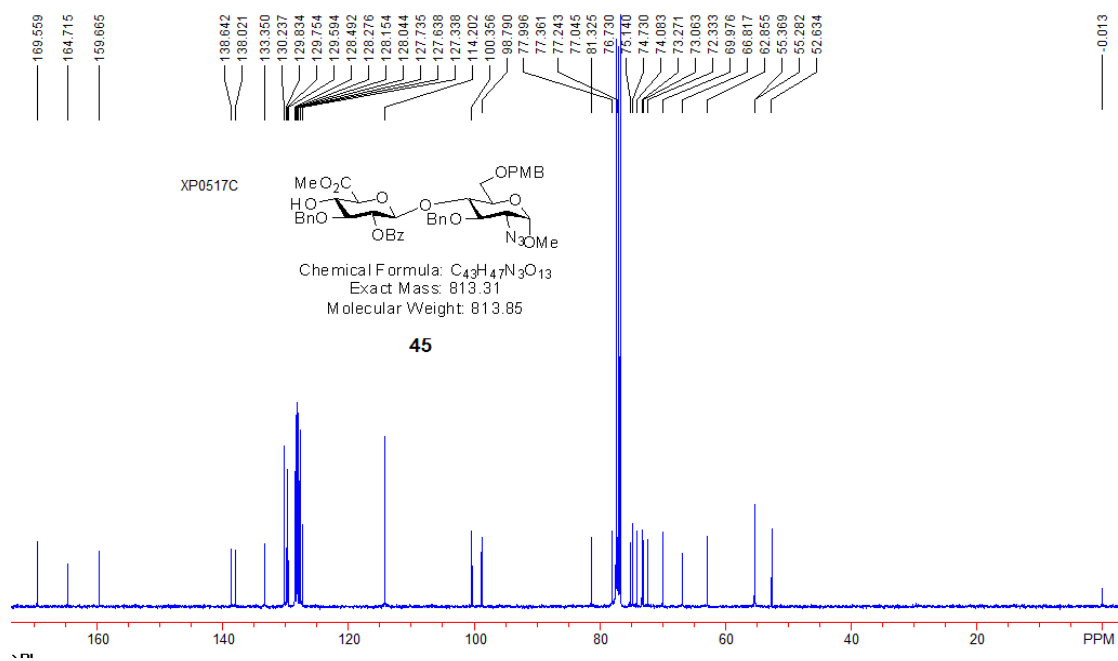

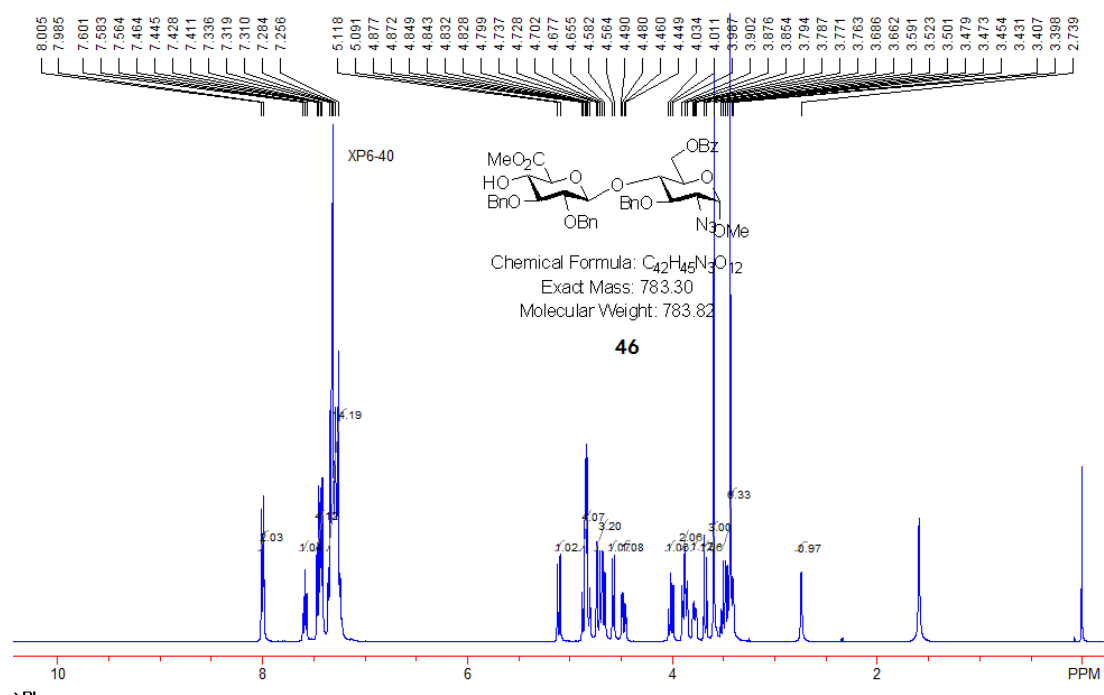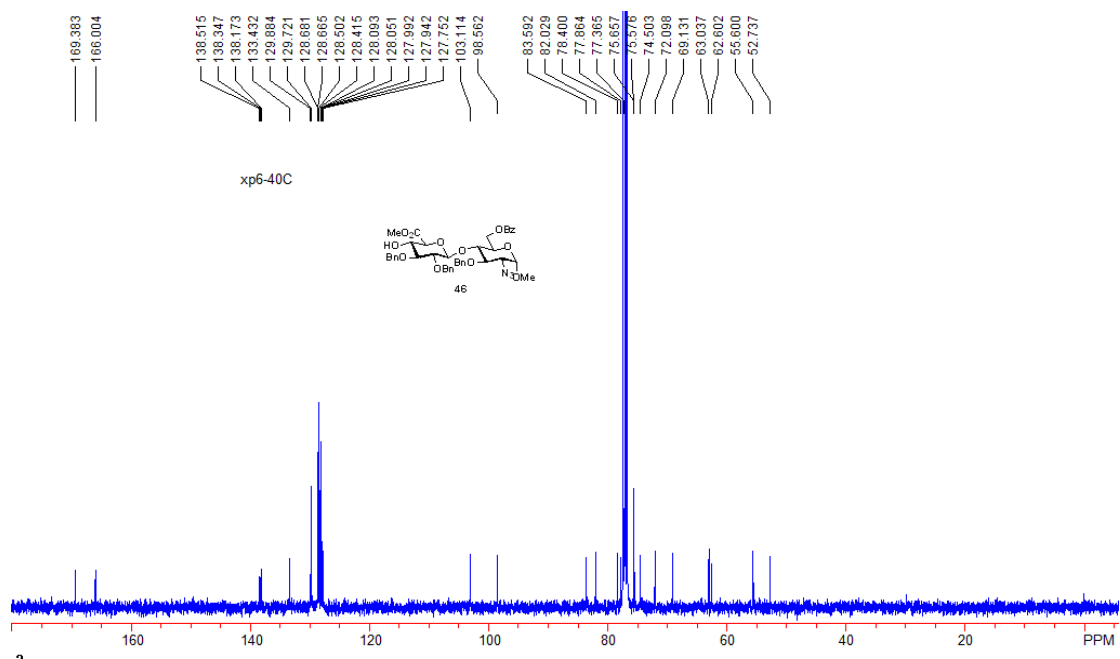

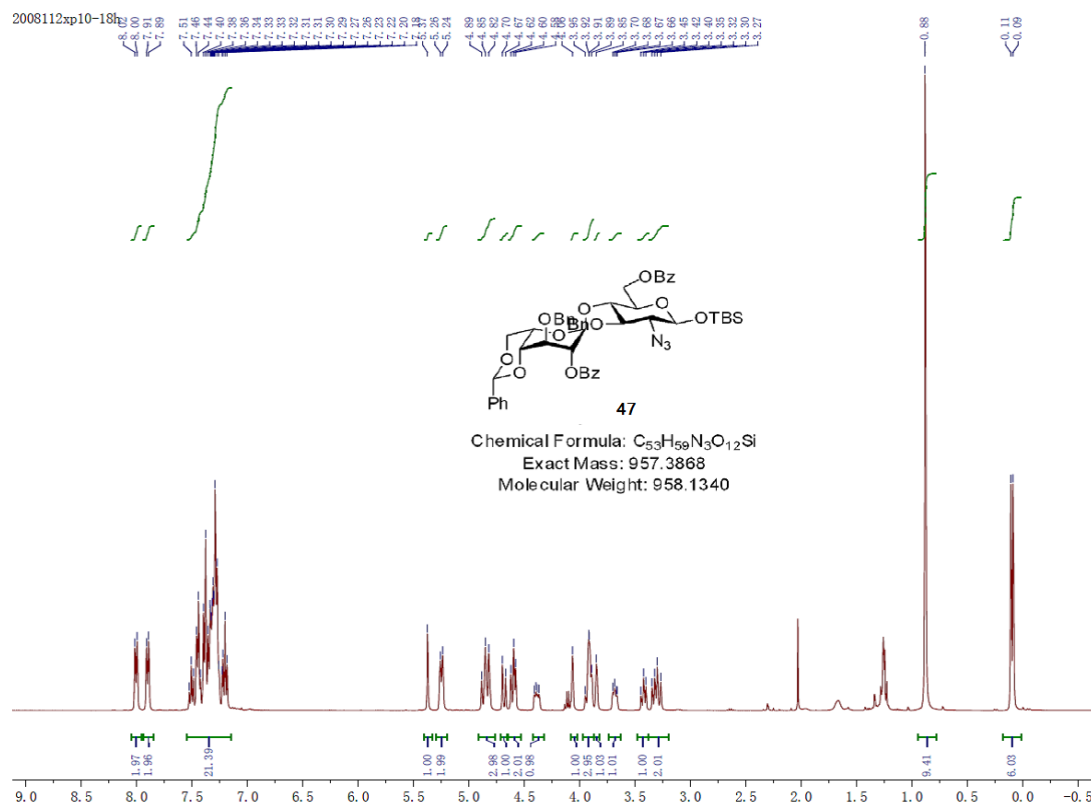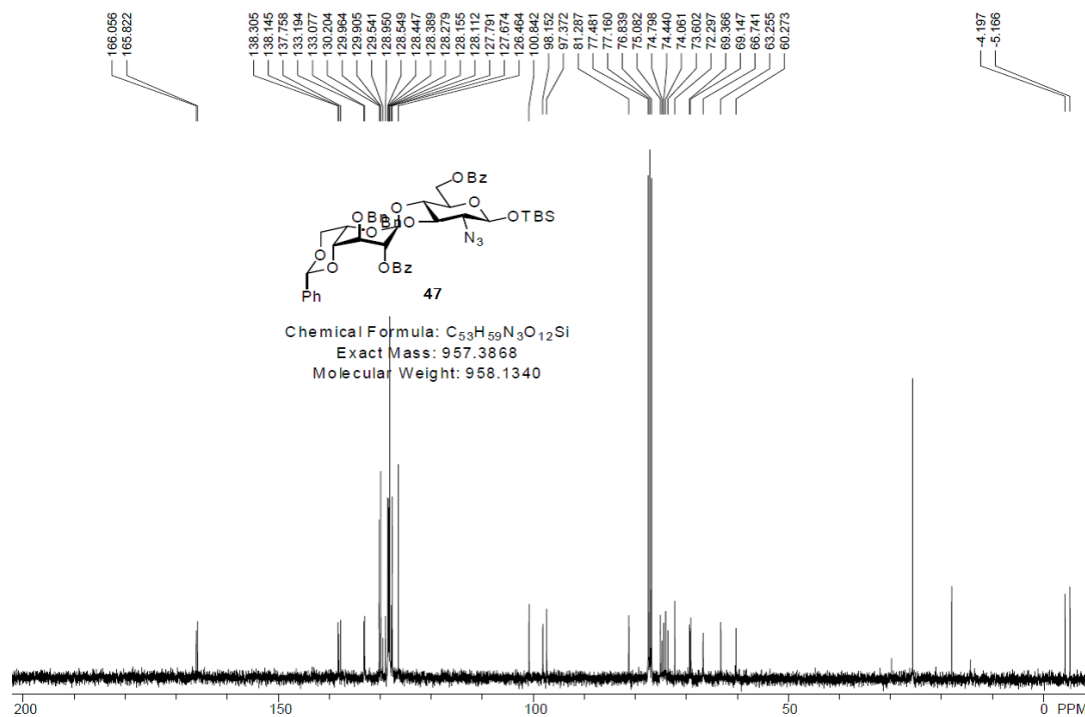

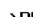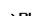

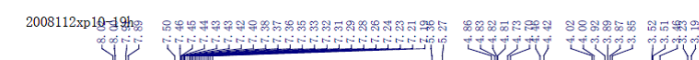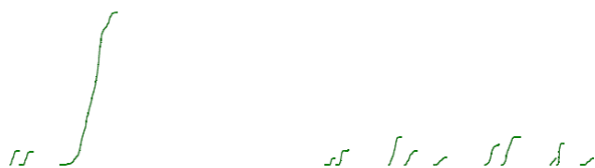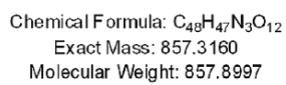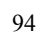

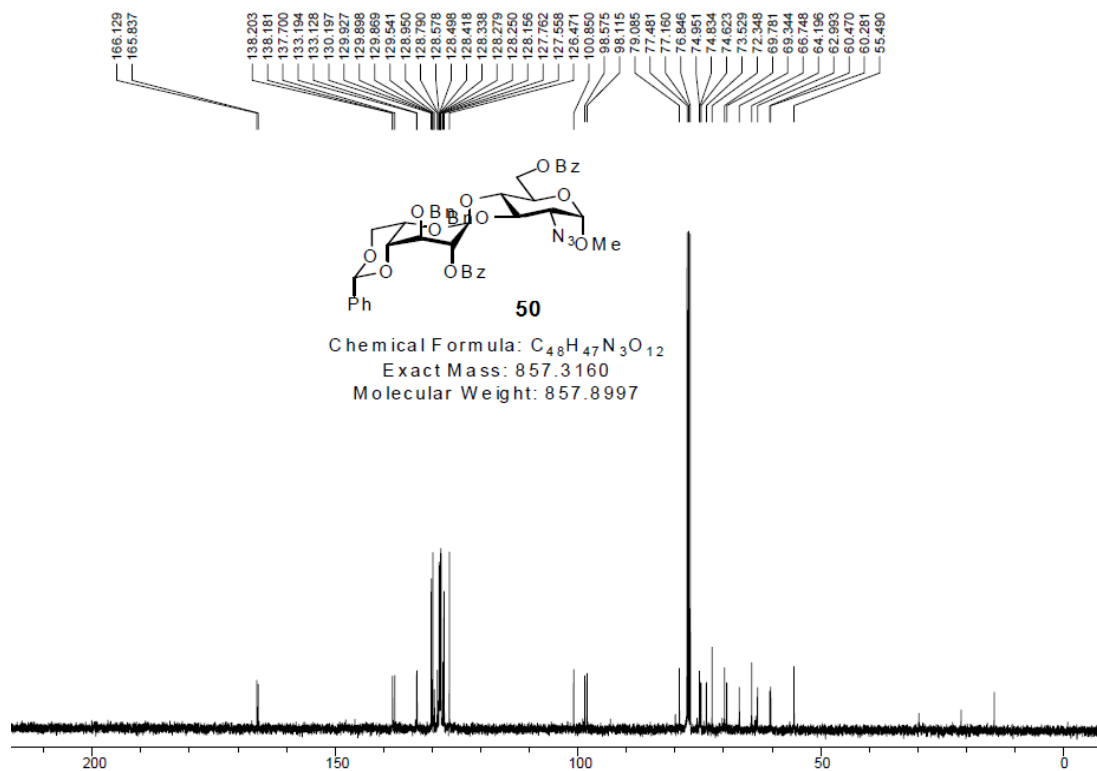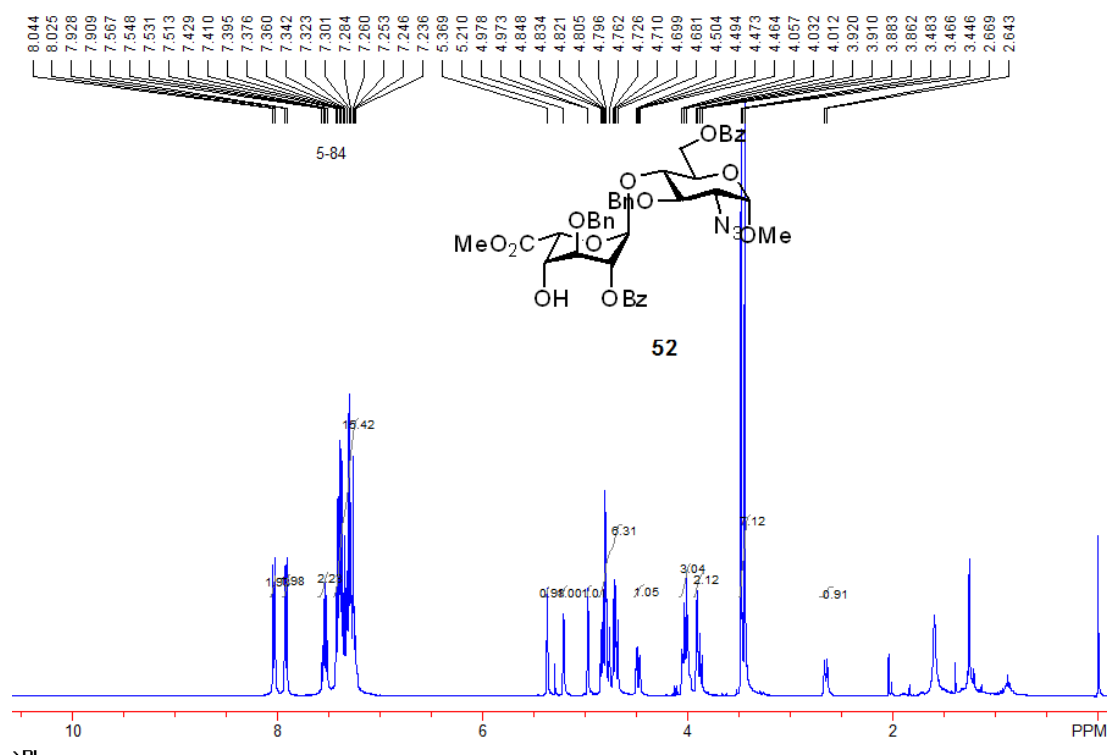

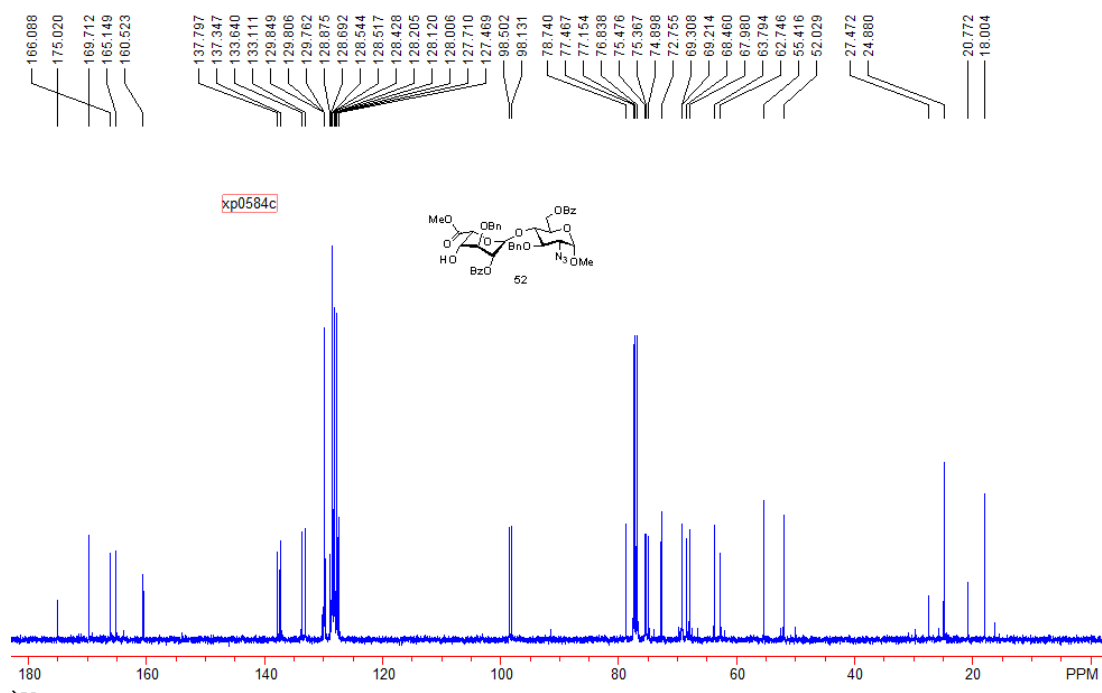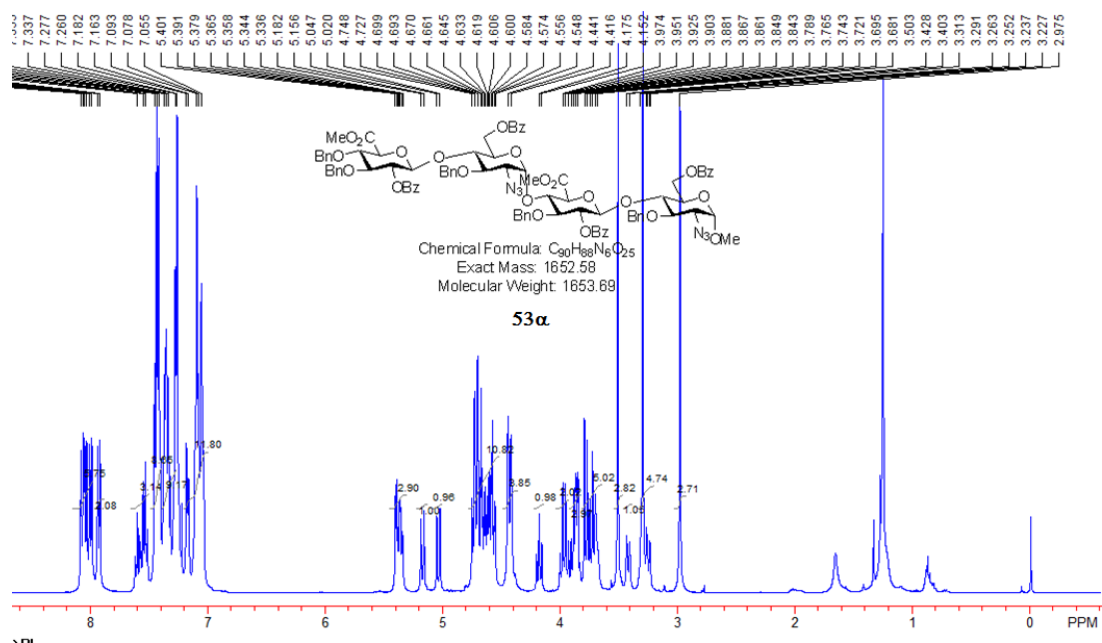

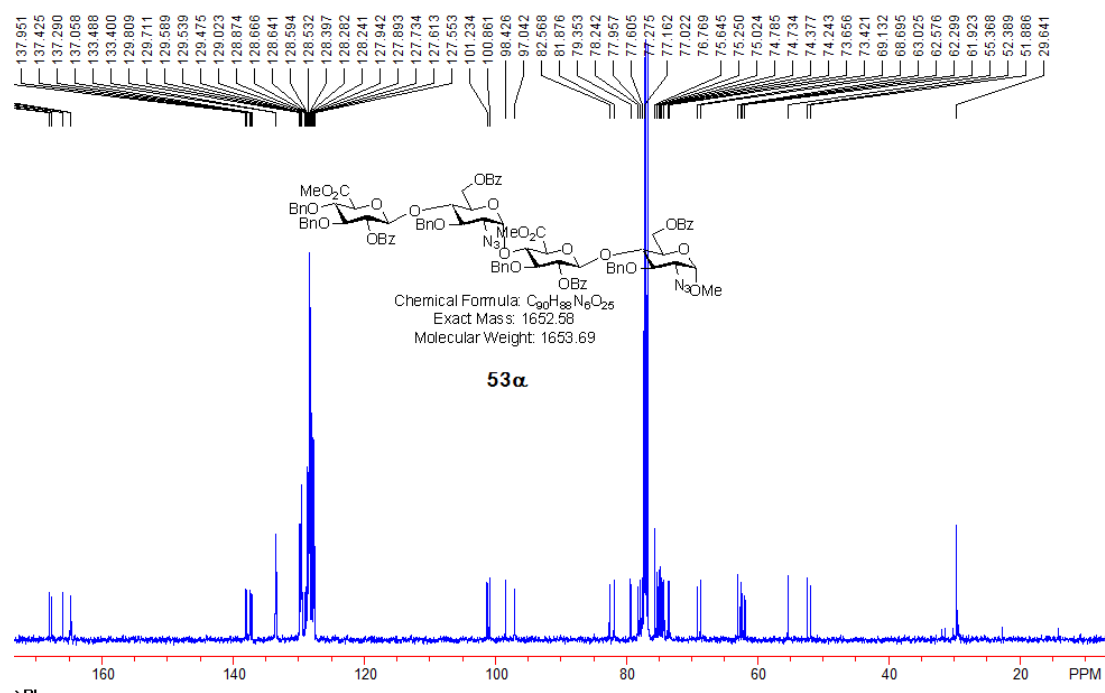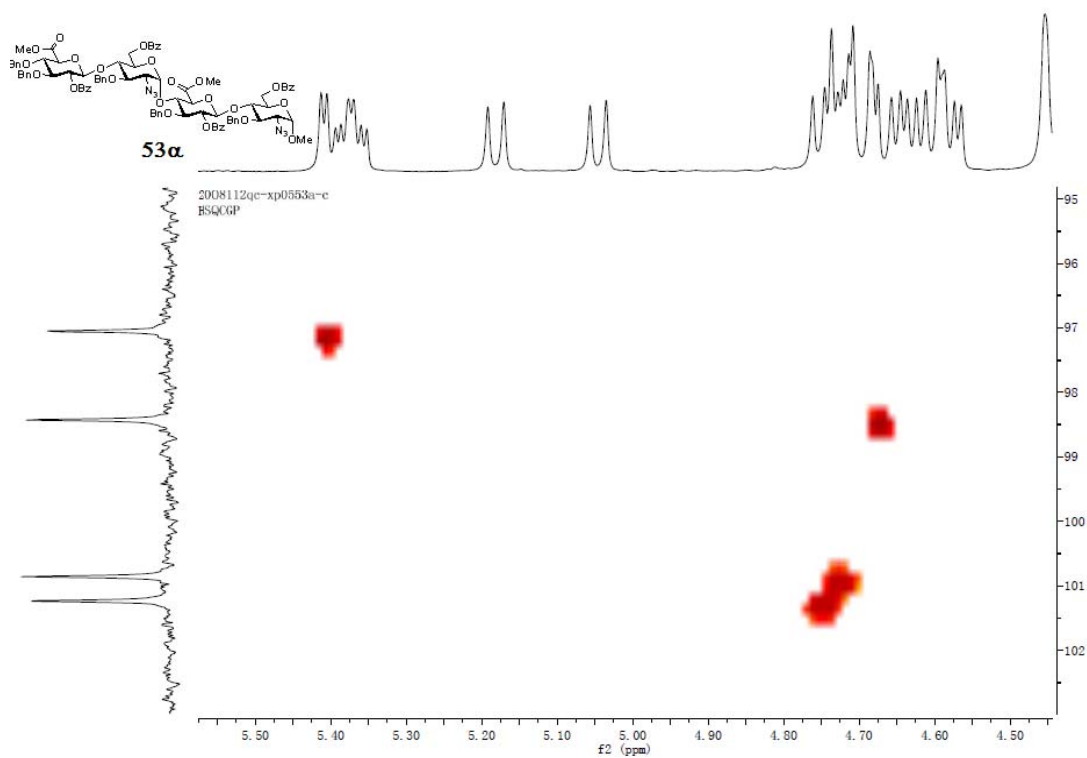

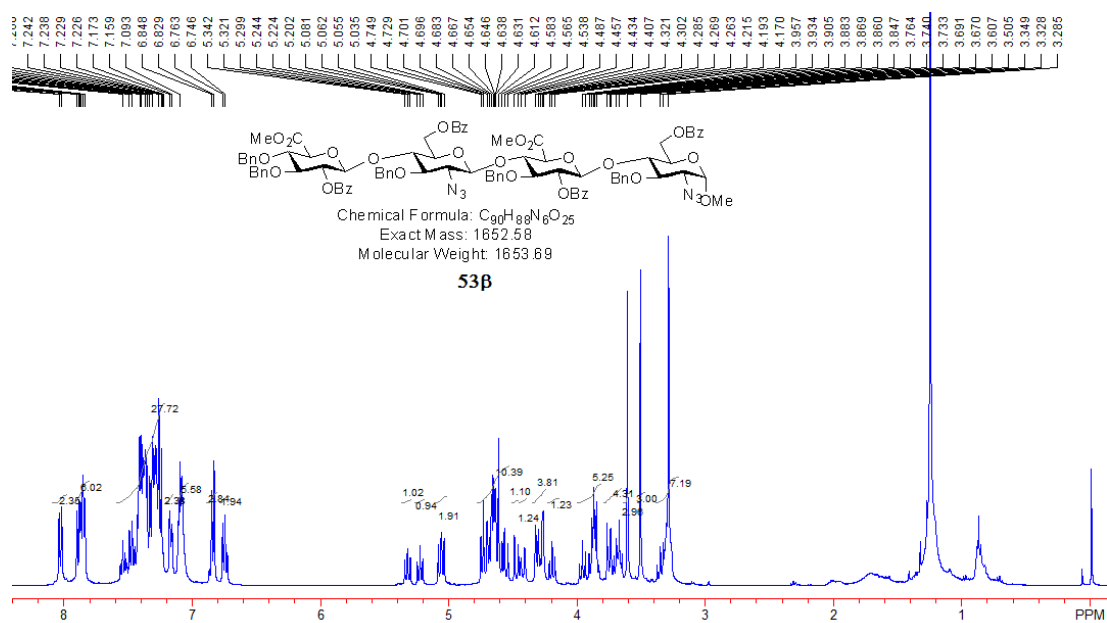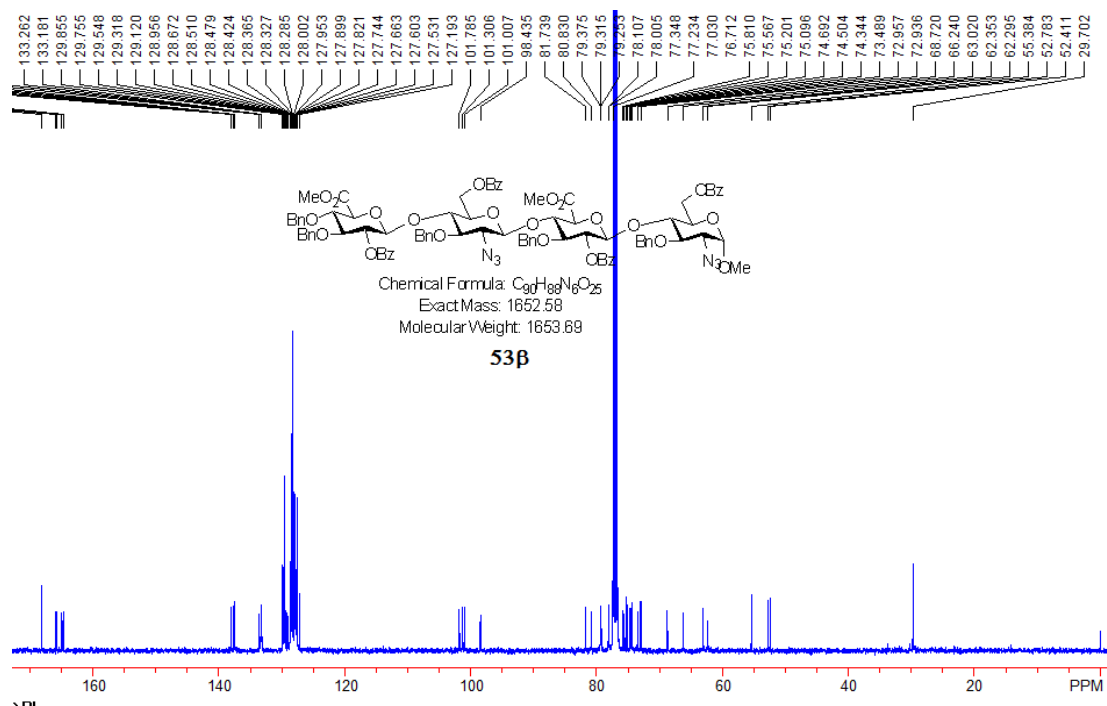

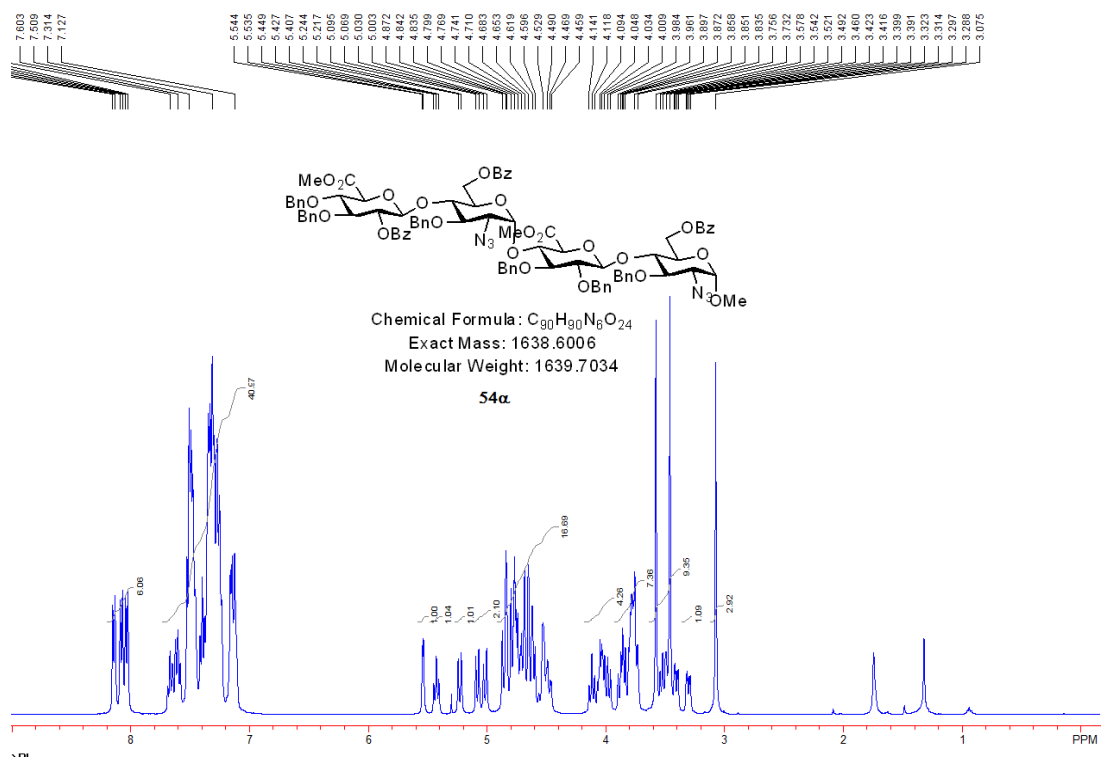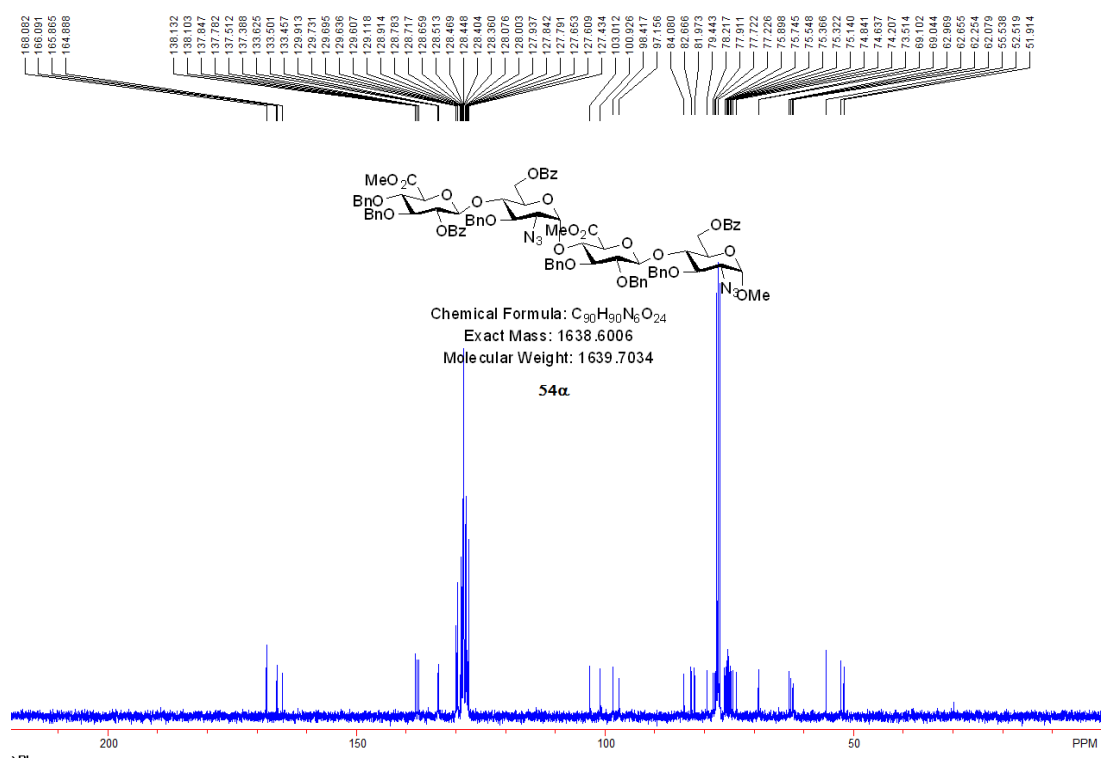

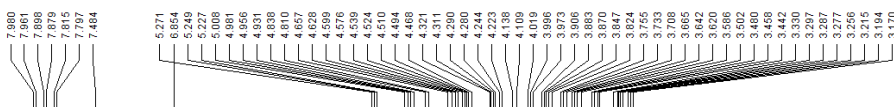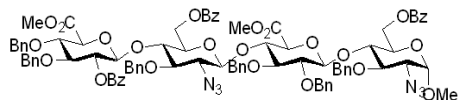

Chemical Formula:  $C_{90}H_{90}N_6O_{24}$

Exact Mass: 1638.6006

Molecular Weight: 1639.7034

**54β**

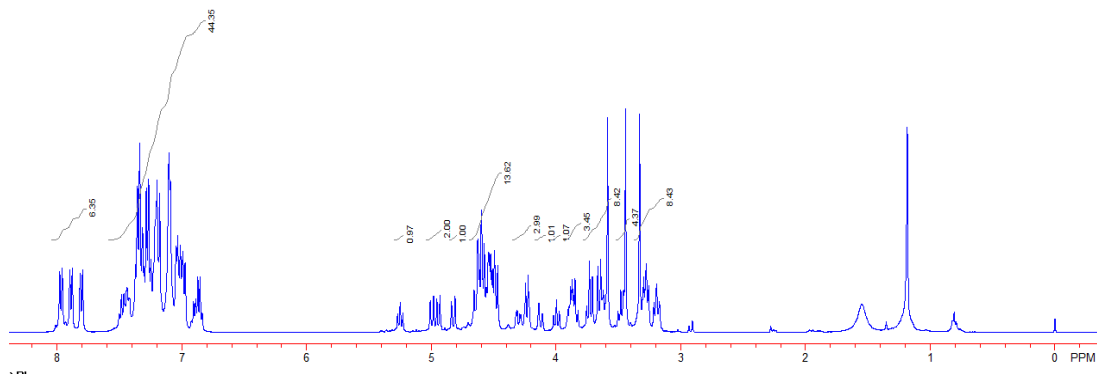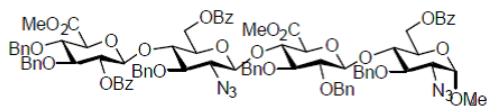

Chemical Formula:  $C_{90}H_{90}N_6O_{24}$

Exact Mass: 1638.6006

Molecular Weight: 1639.7034

**54β**

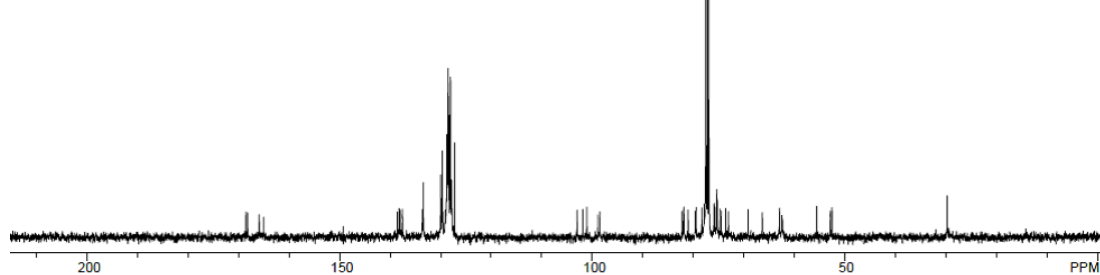

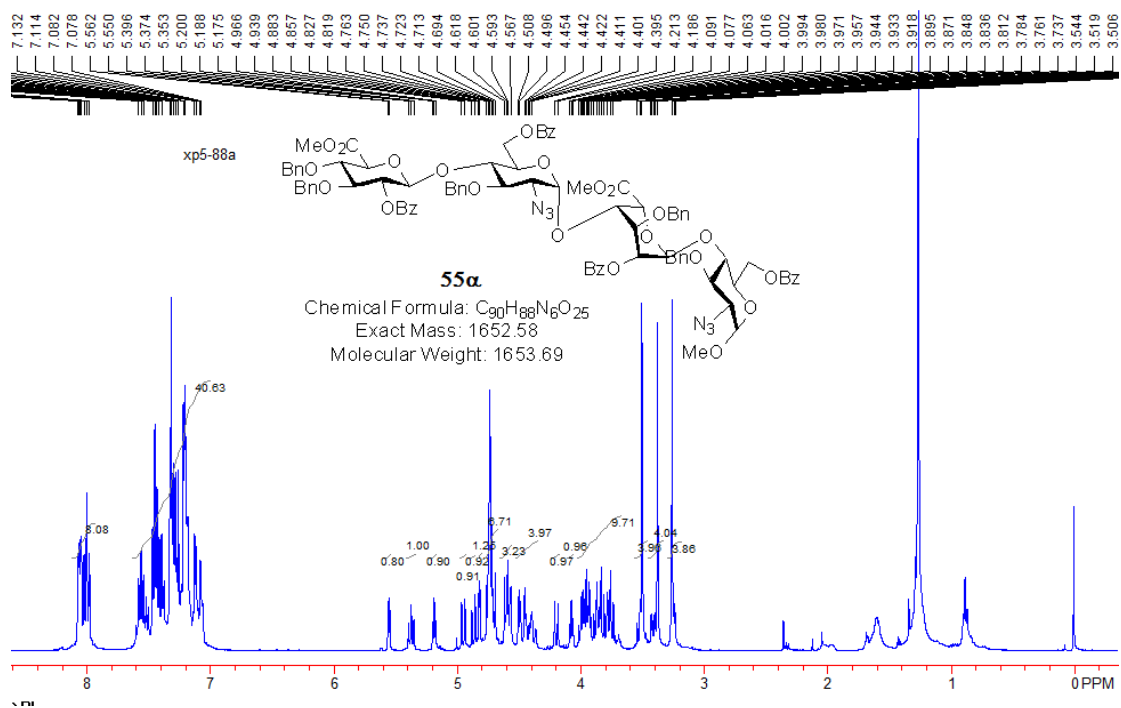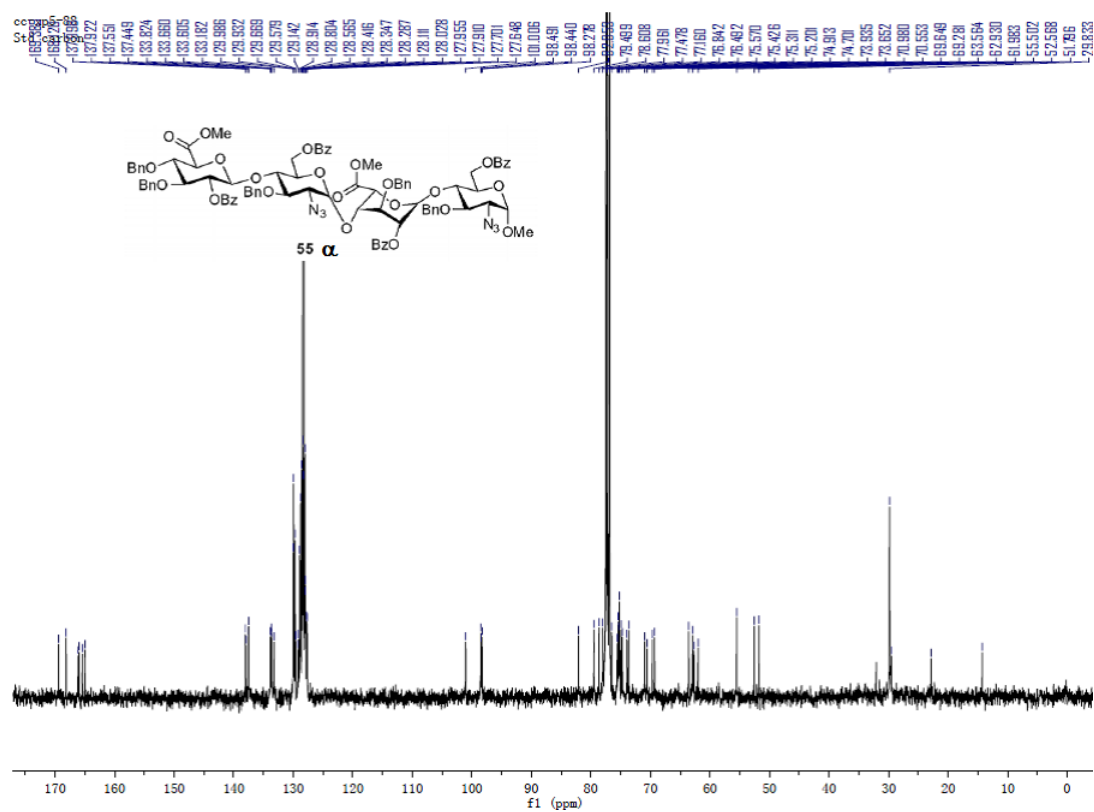

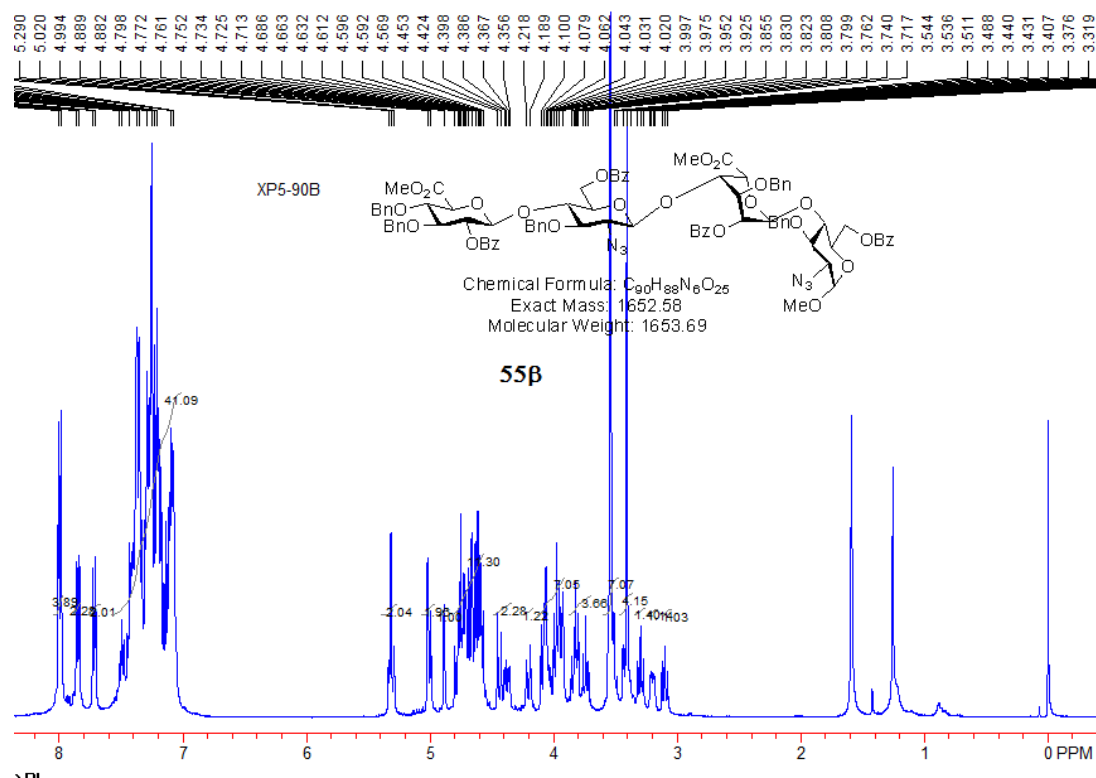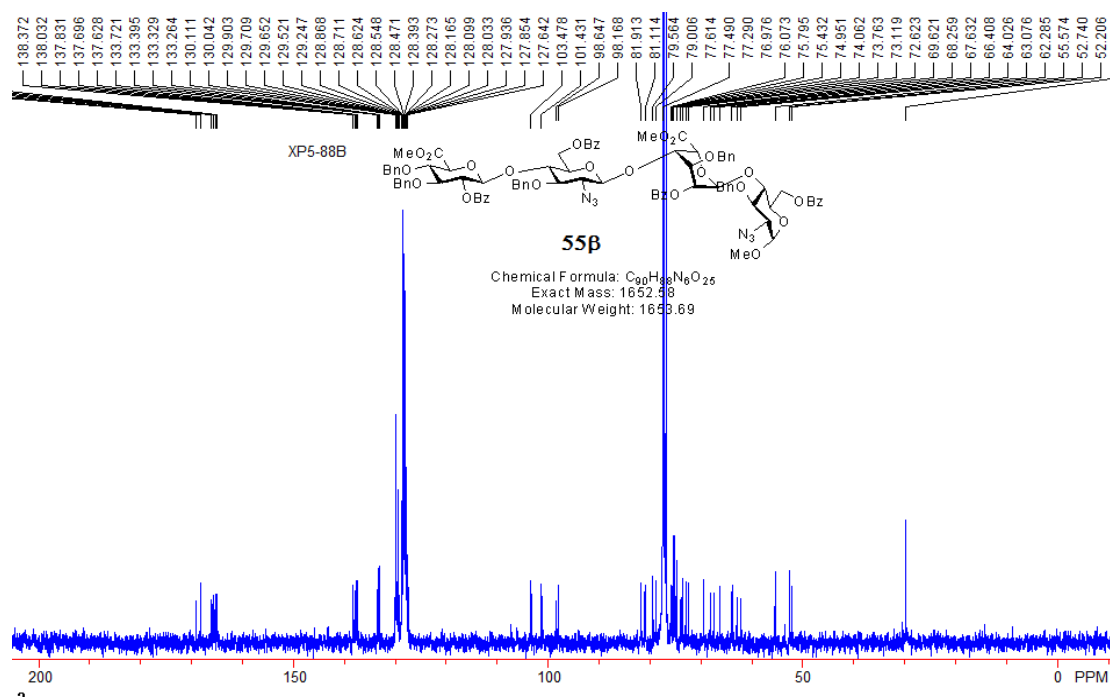

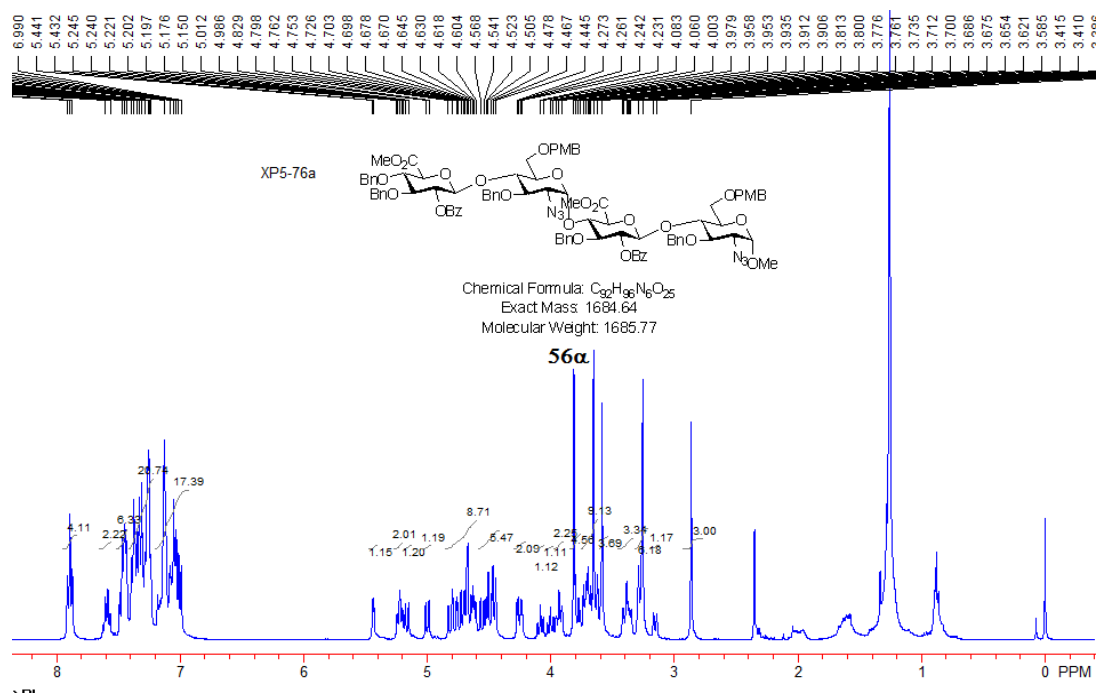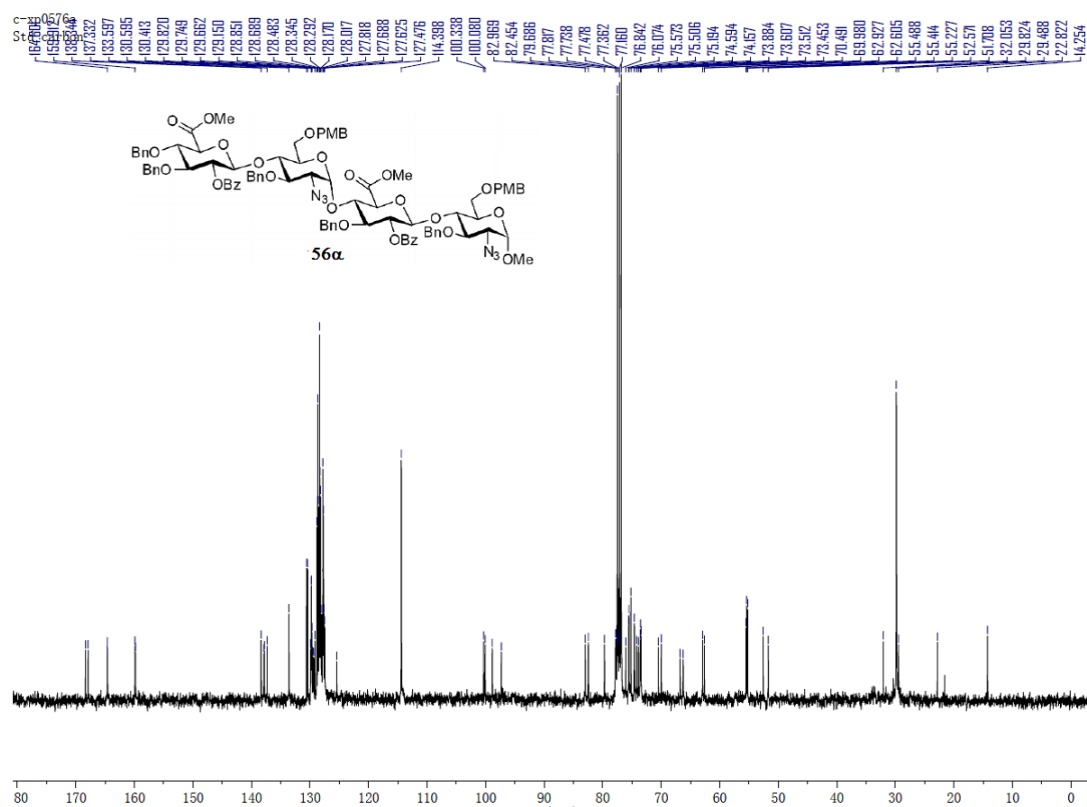

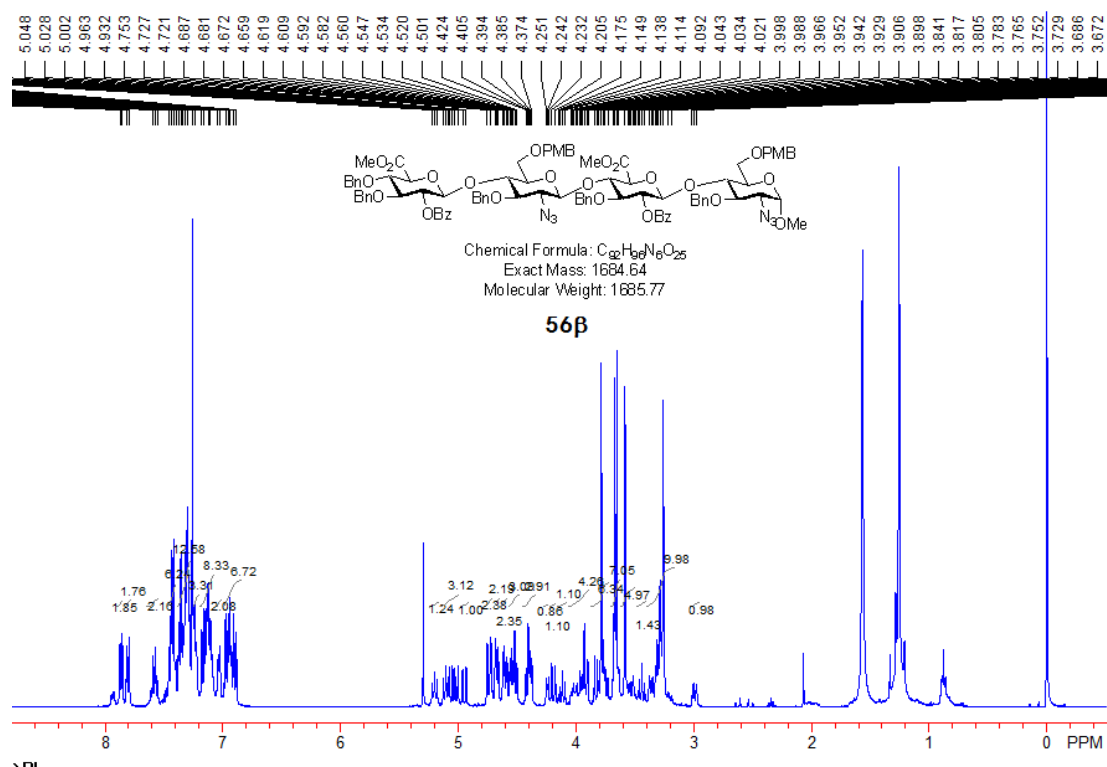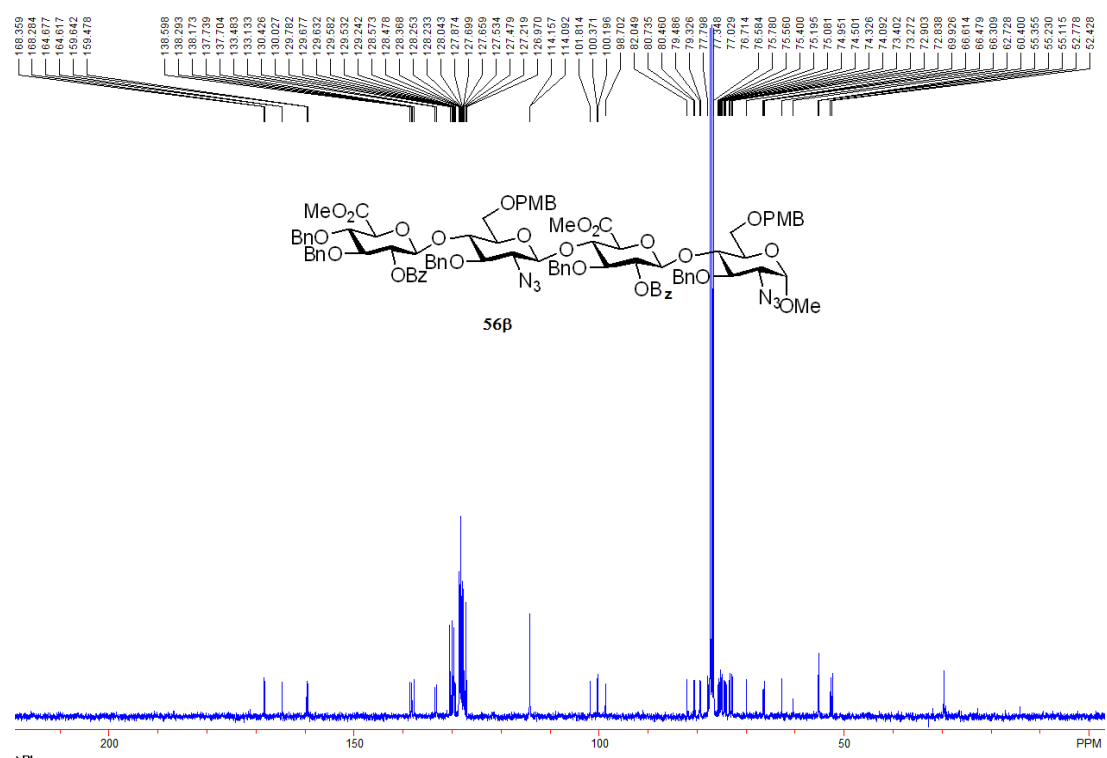

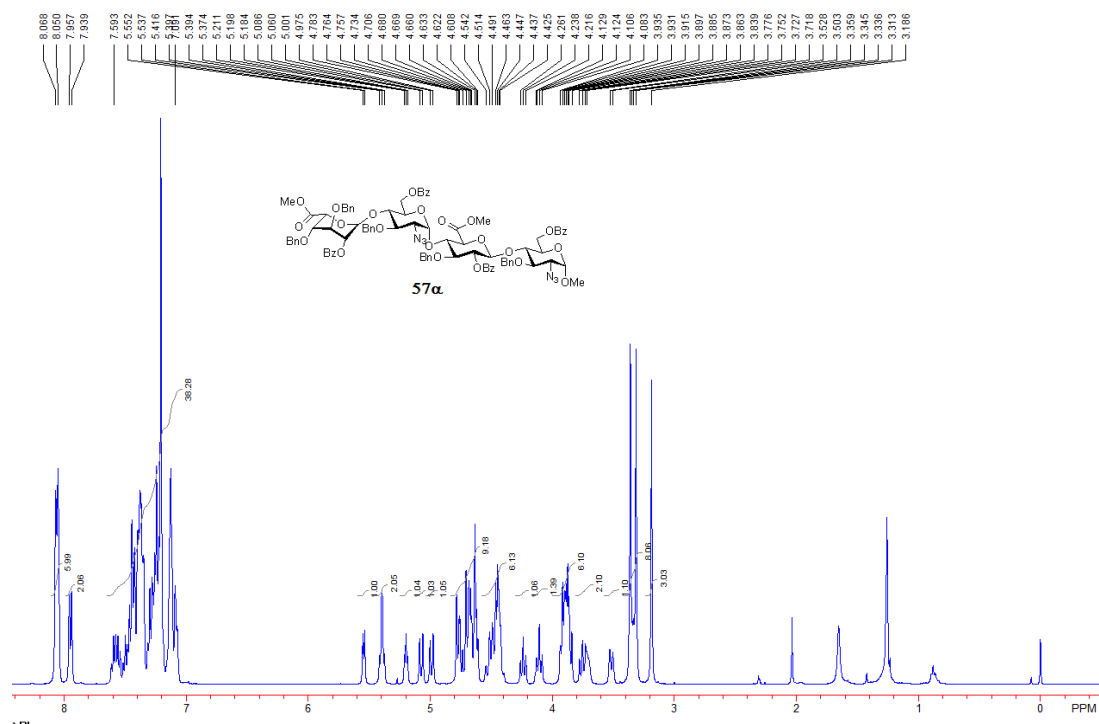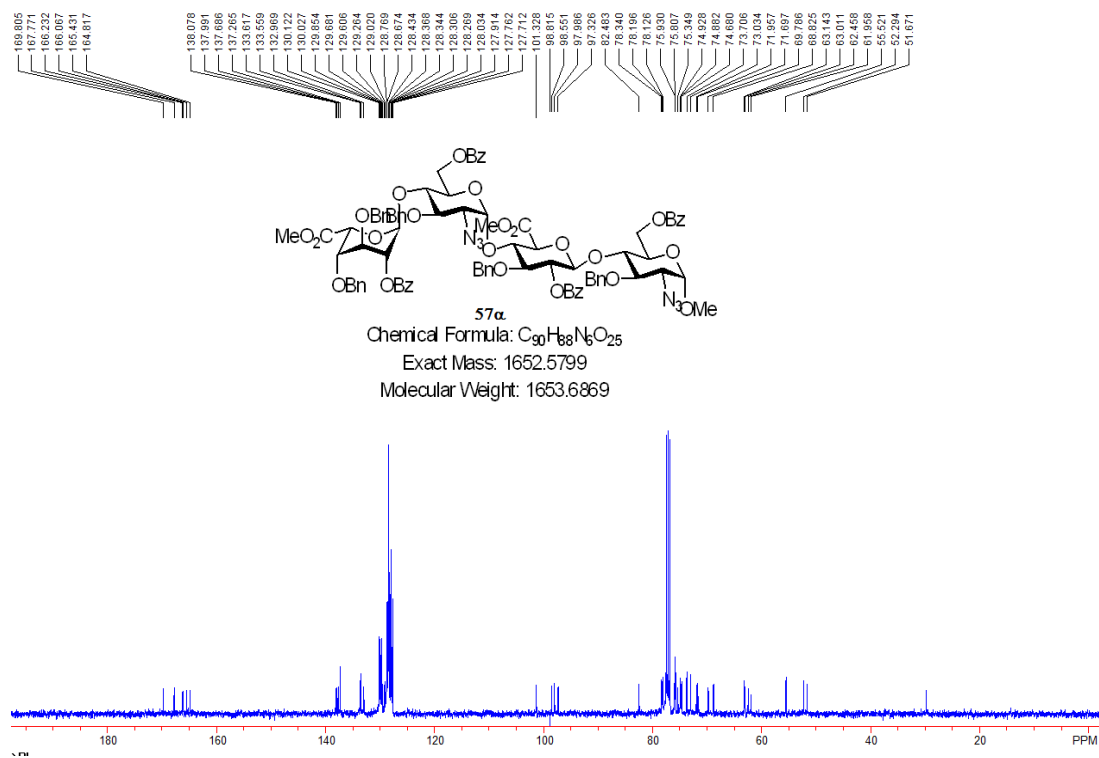

**57a**  
 Chemical Formula: C<sub>90</sub>H<sub>88</sub>N<sub>6</sub>O<sub>25</sub>  
 Exact Mass: 1652.5799  
 Molecular Weight: 1653.6869

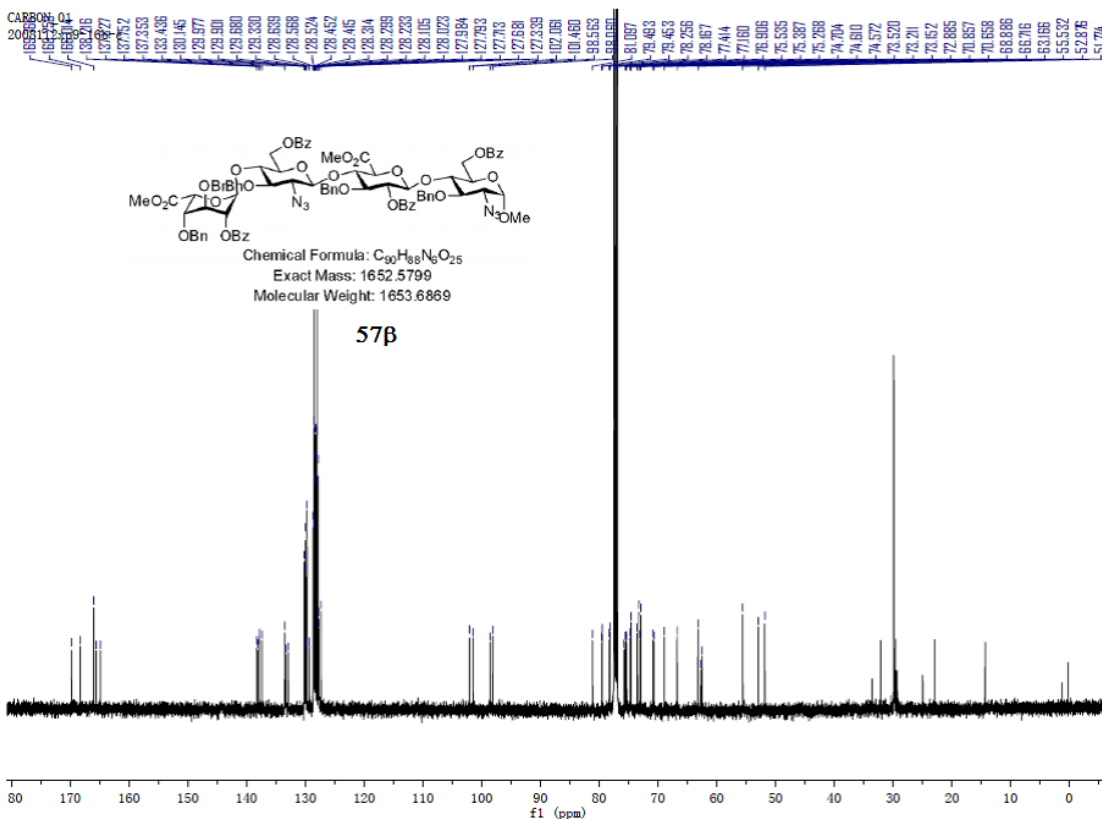

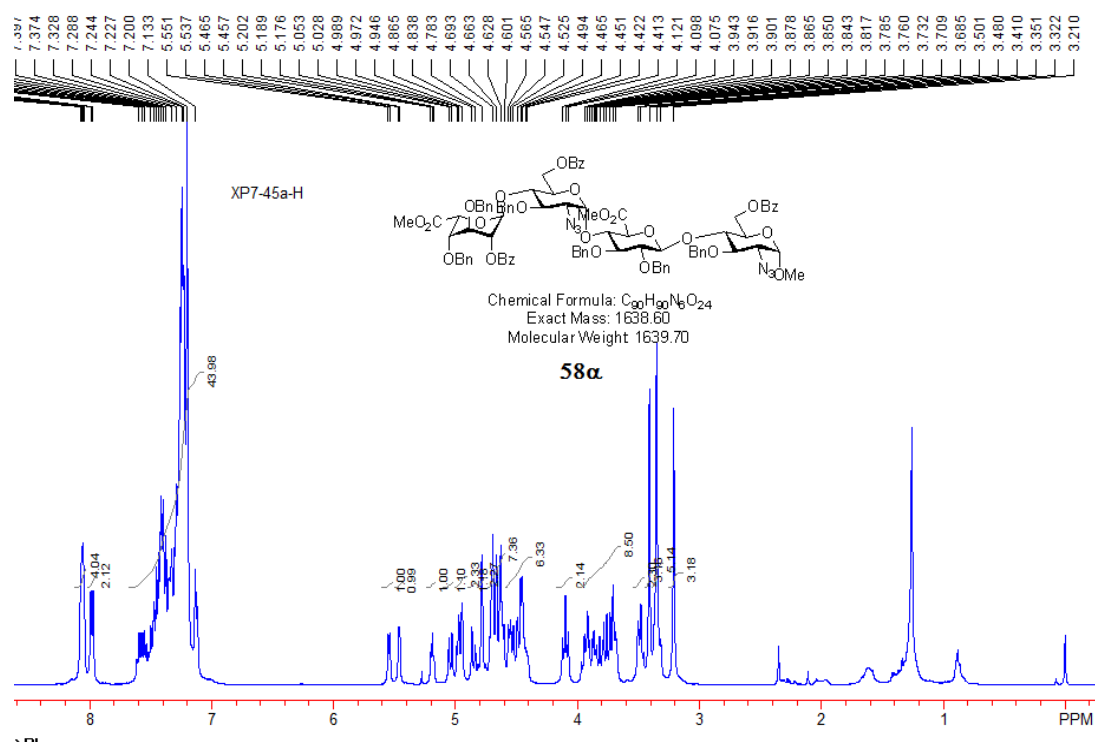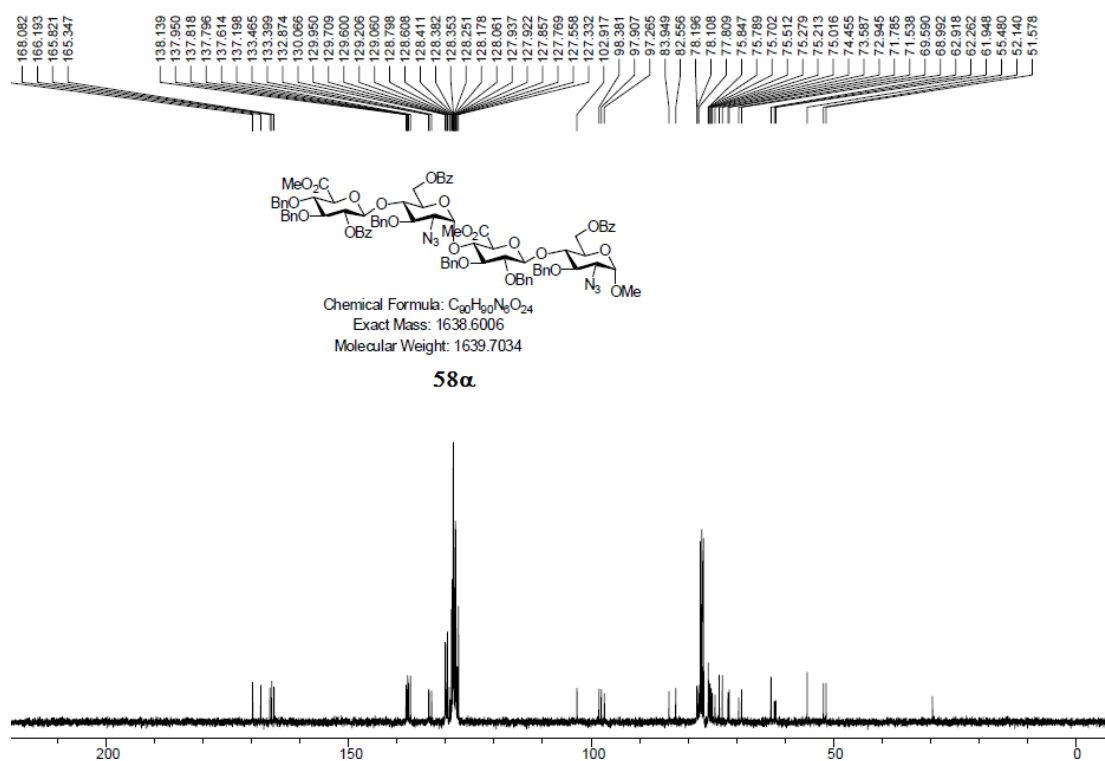

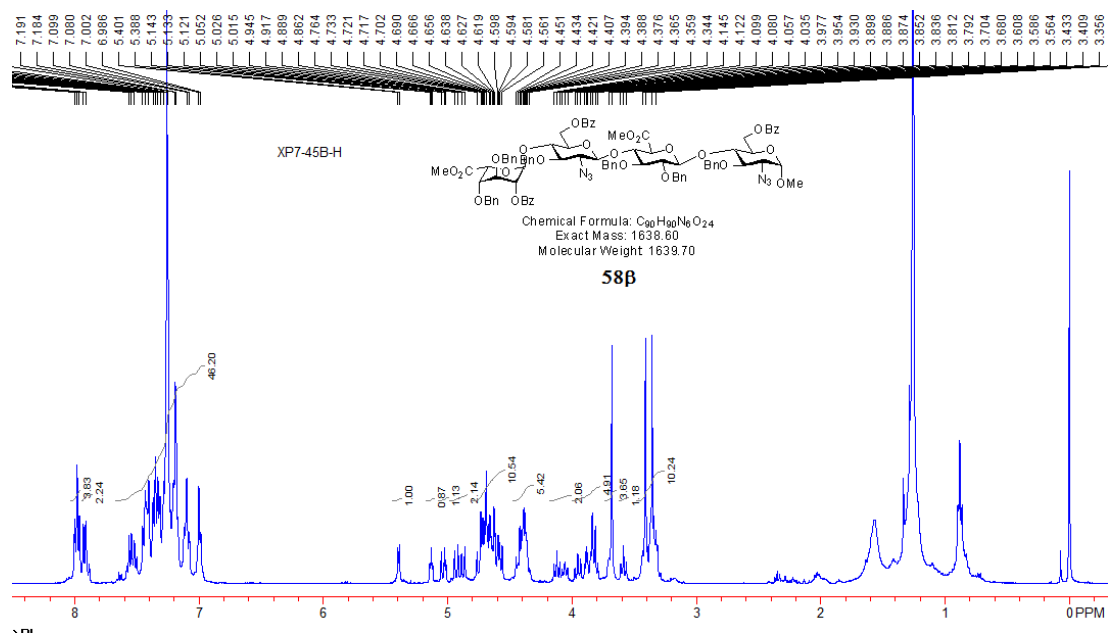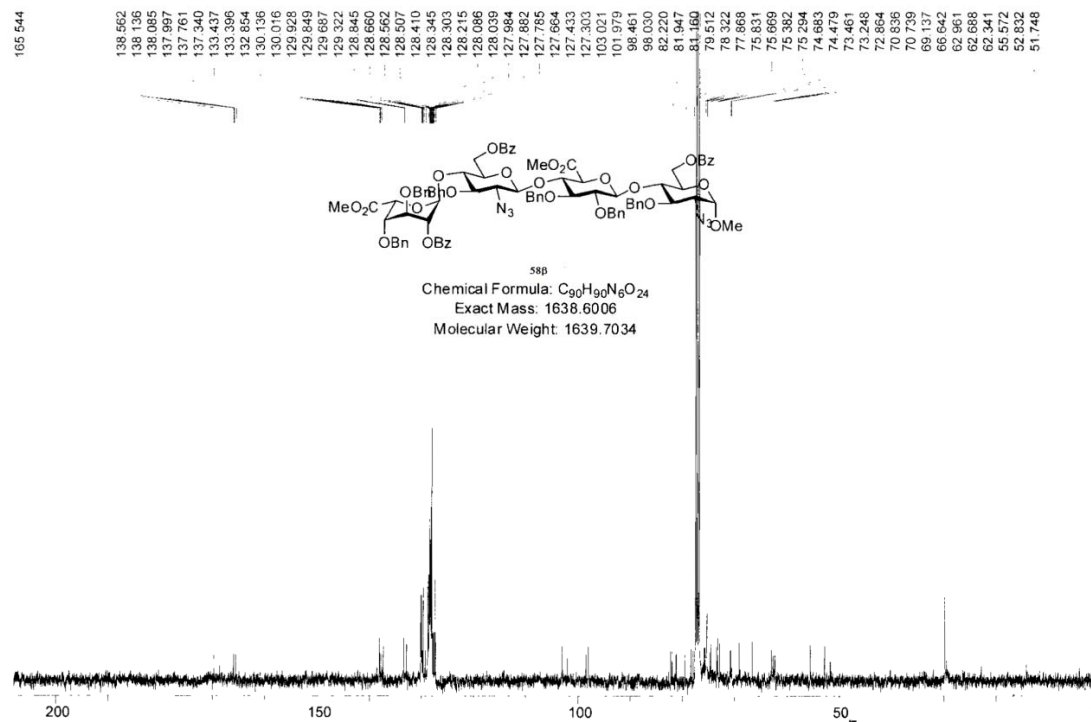

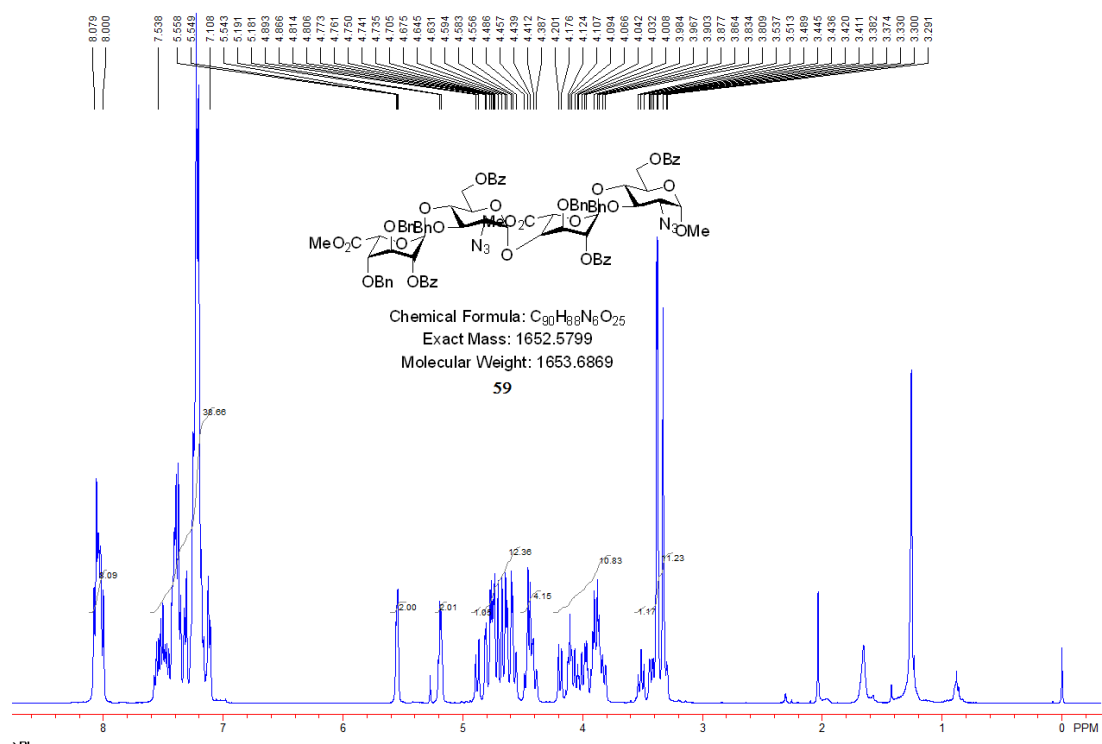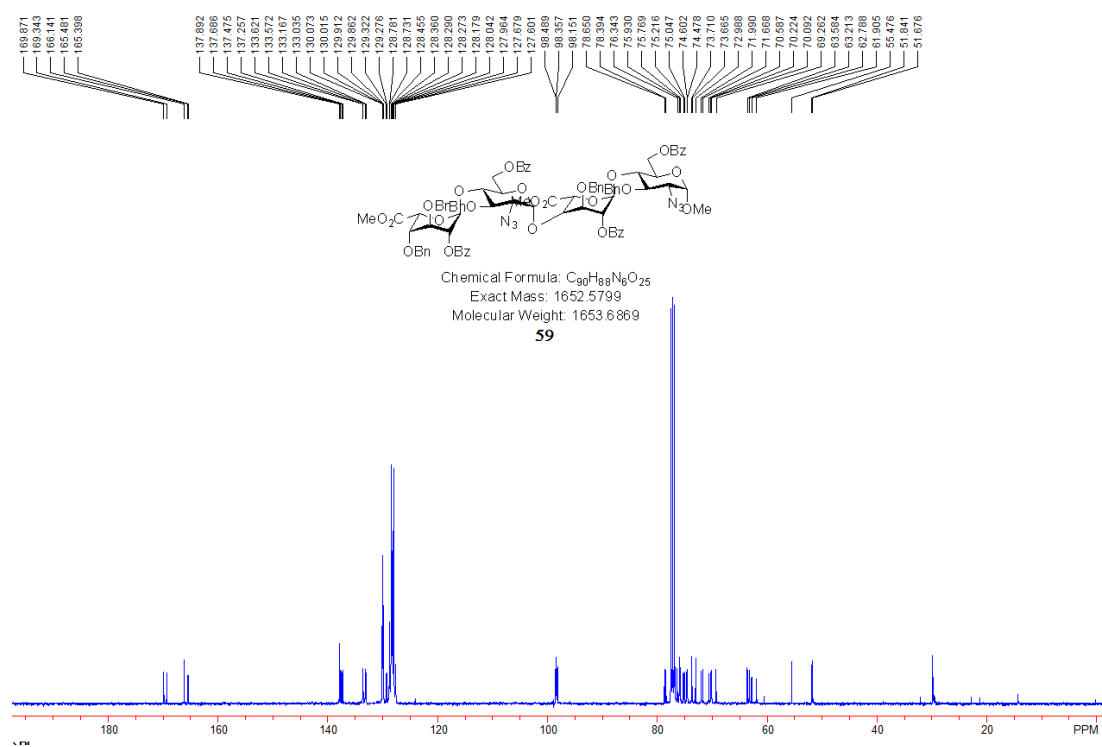

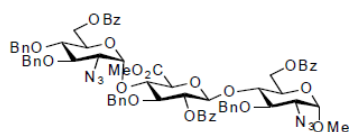

60α

Chemical Formula:  $C_{69}H_{68}N_8O_{18}$

Exact Mass: 1268.4590

Molecular Weight: 1269.3076

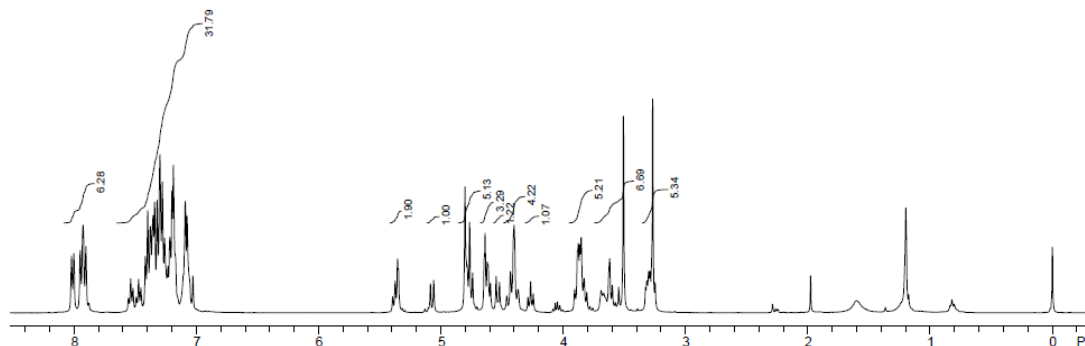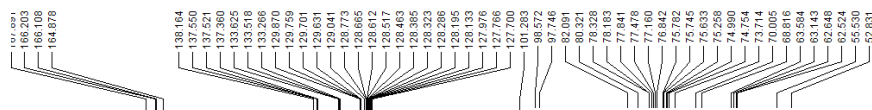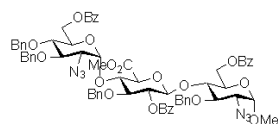

60α

Chemical Formula:  $C_{69}H_{68}N_6O_{18}$

Exact Mass: 1268.4590

Molecular Weight: 1269.3076

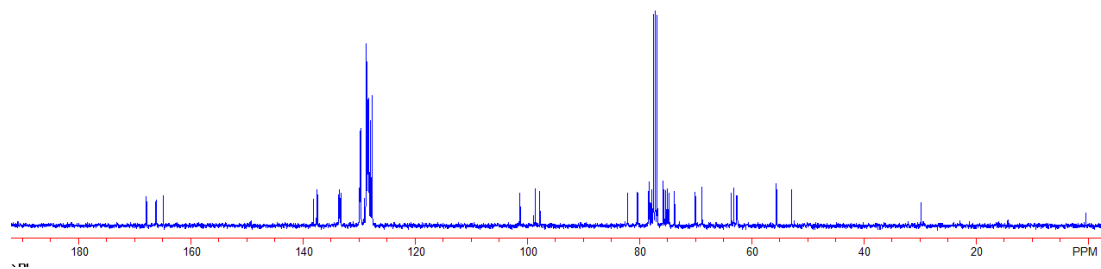

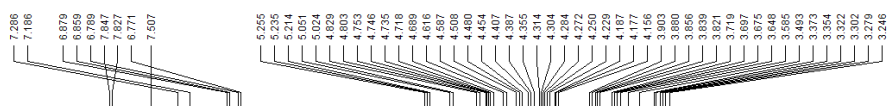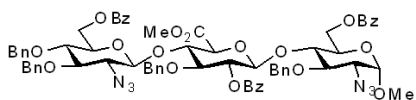

60β

Chemical Formula: C<sub>69</sub>H<sub>88</sub>N<sub>6</sub>O<sub>18</sub>

Exact Mass: 1268.4590

Molecular Weight: 1269.3076

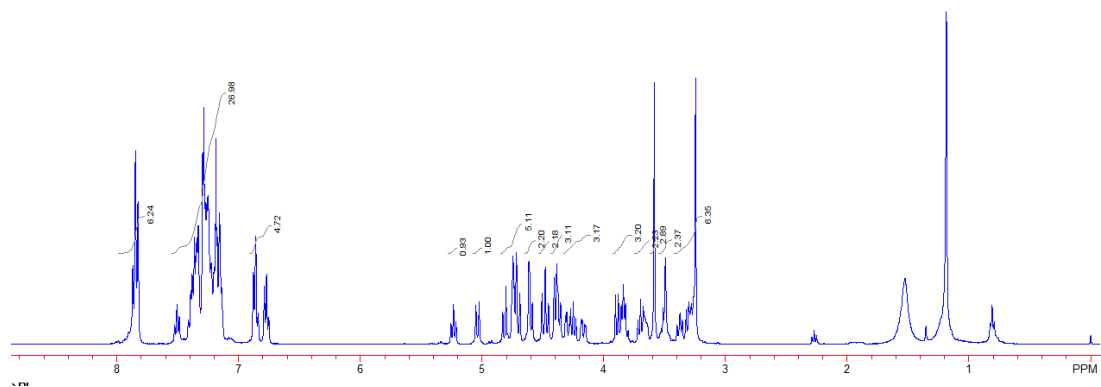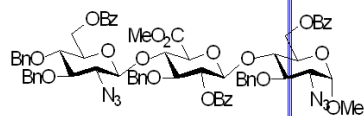

60β

Chemical Formula: C<sub>69</sub>H<sub>88</sub>N<sub>6</sub>O<sub>18</sub>

Exact Mass: 1268.4590

Molecular Weight: 1269.3076

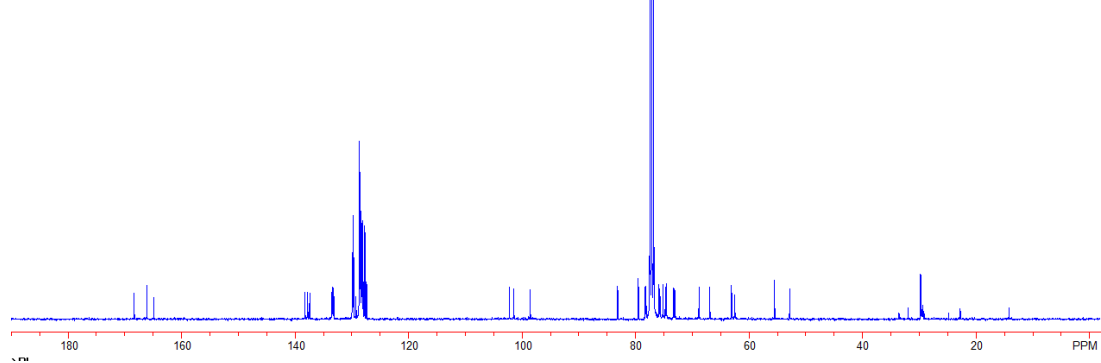

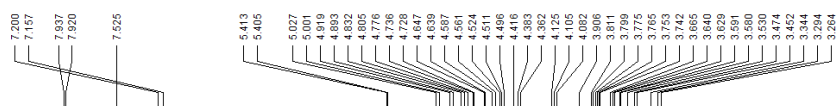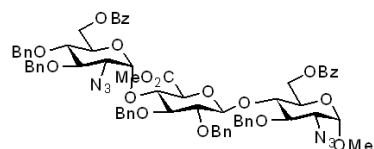

**61**

Chemical Formula:  $C_{69}H_{70}N_6O_{17}$

Exact Mass: 1254.4797

Molecular Weight: 1255.3241

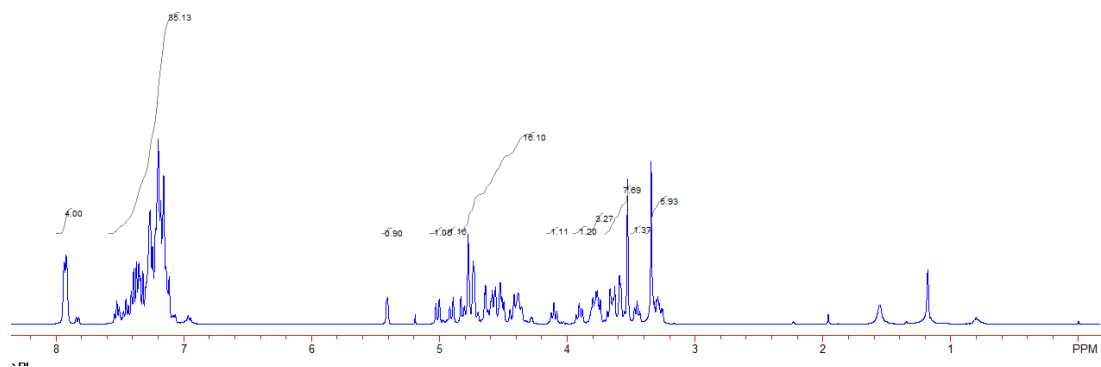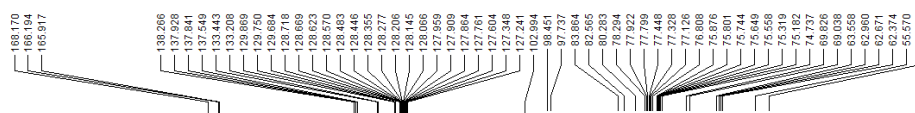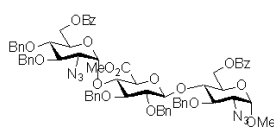

**61**

Chemical Formula:  $C_{69}H_{70}N_6O_{17}$

Exact Mass: 1254.4797

Molecular Weight: 1255.3241

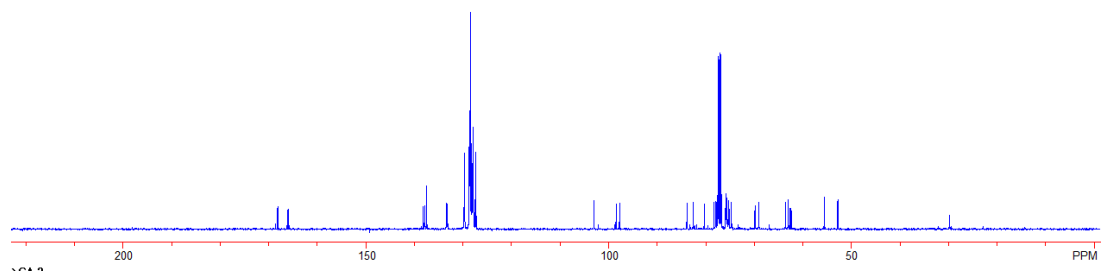

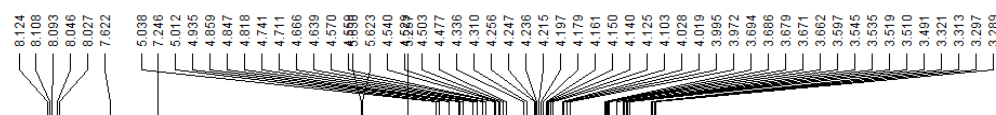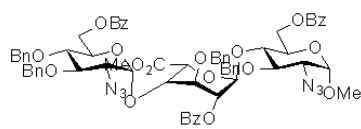

**62α**

Chemical Formula: C<sub>69</sub>H<sub>68</sub>N<sub>6</sub>O<sub>18</sub>

Exact Mass: 1268.4590

Molecular Weight: 1269.3076

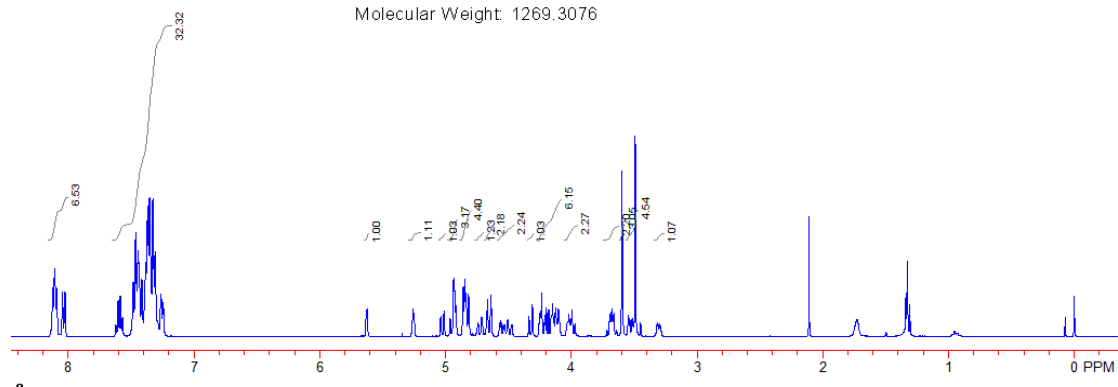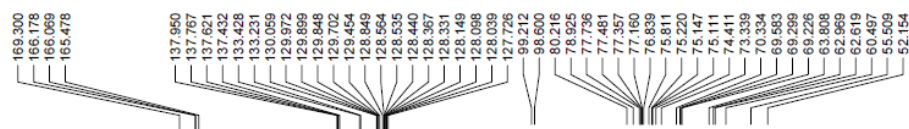

XP9-59a-C

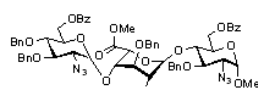

**62α**

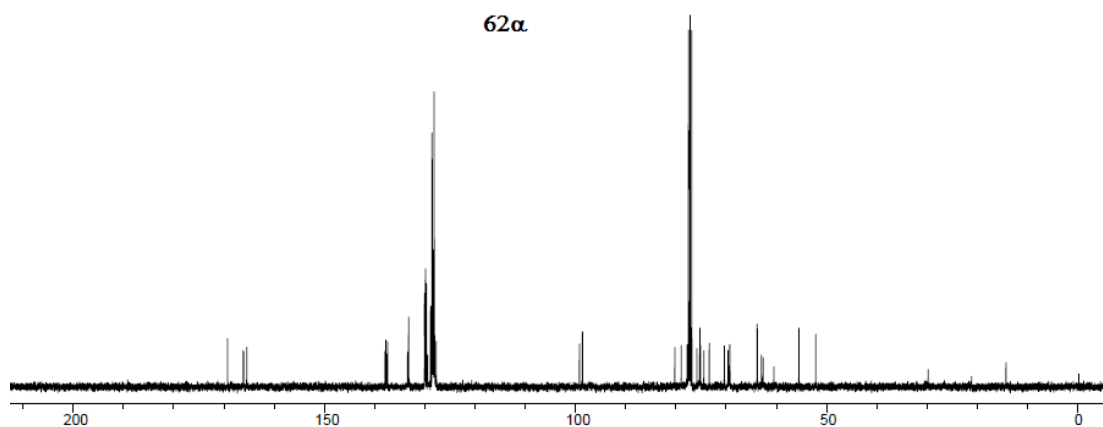

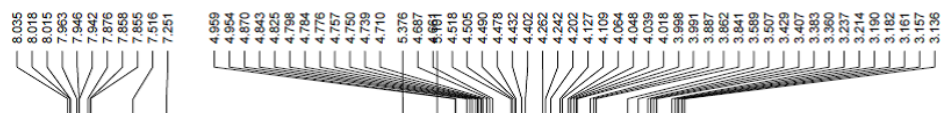

XP9-59b-H

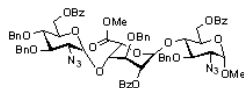

62β

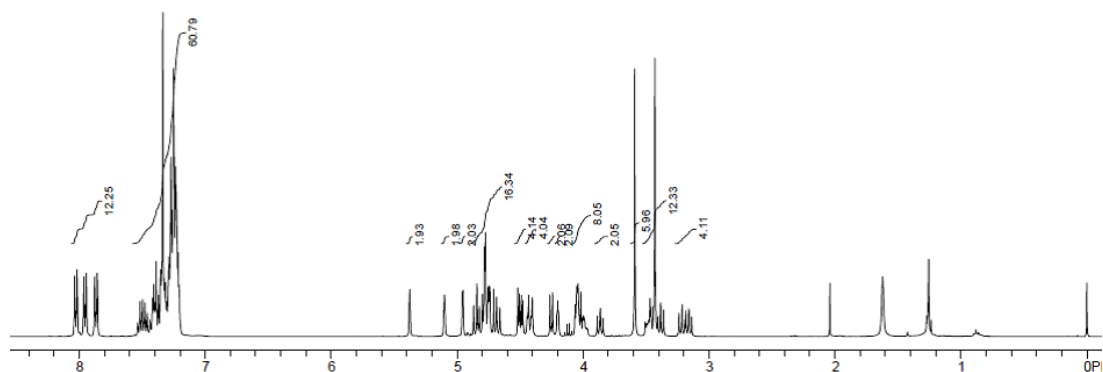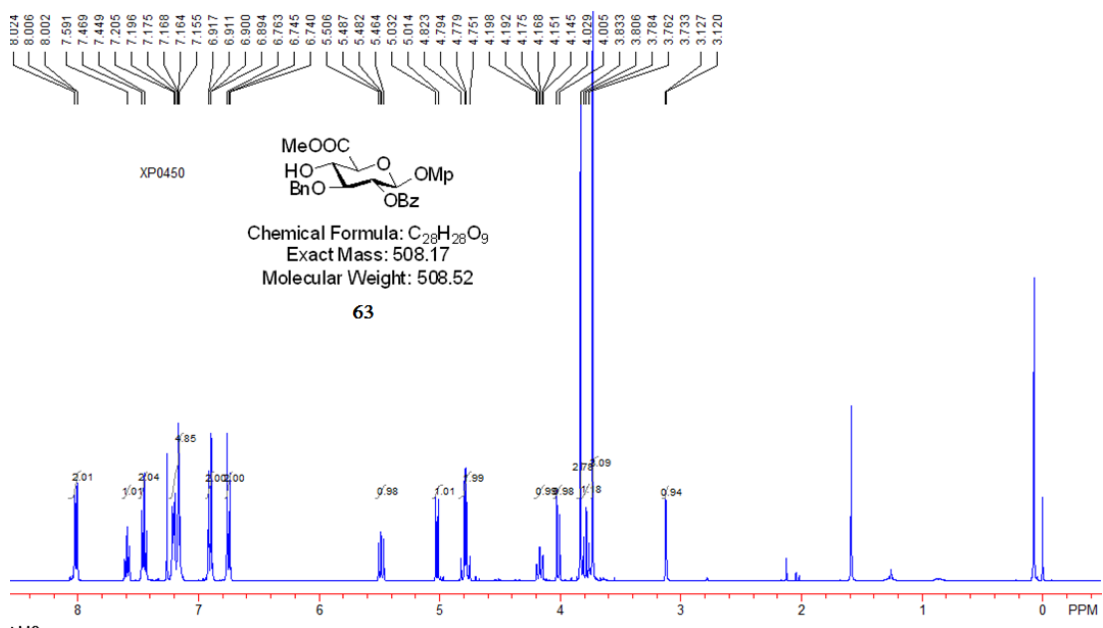

XP0450

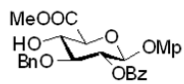

Chemical Formula:  $C_{28}H_{26}O_9$   
Exact Mass: 508.17  
Molecular Weight: 508.52

63

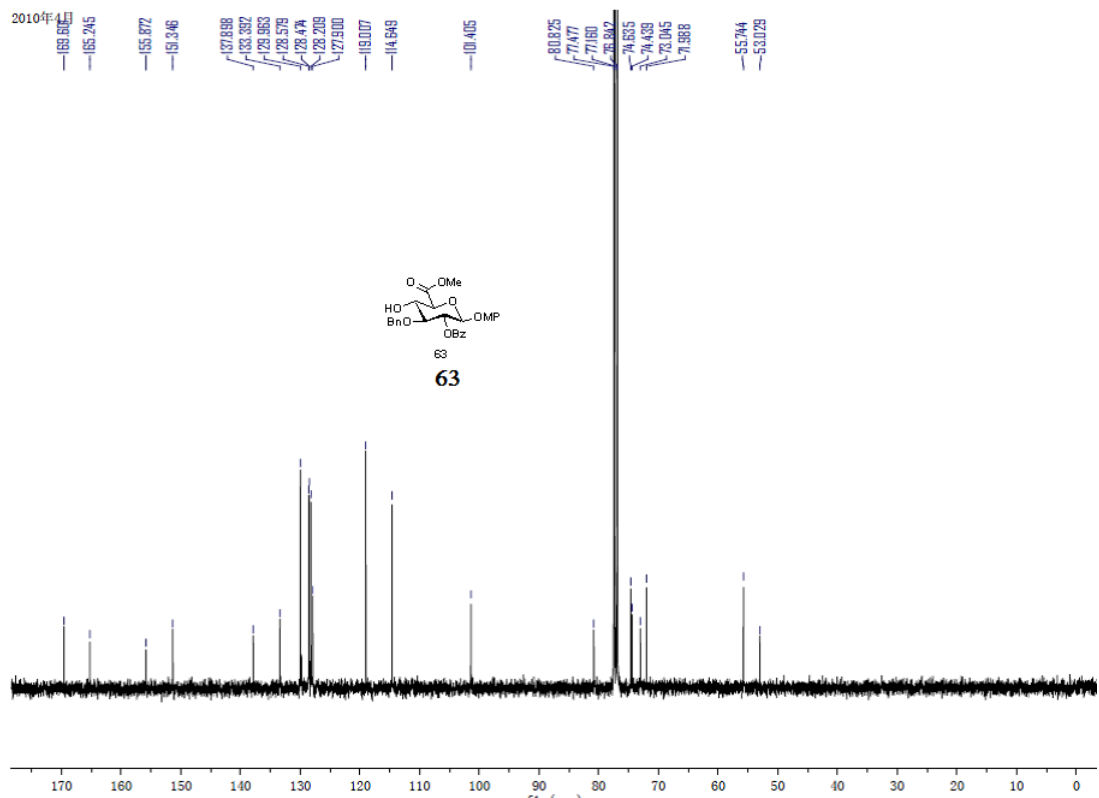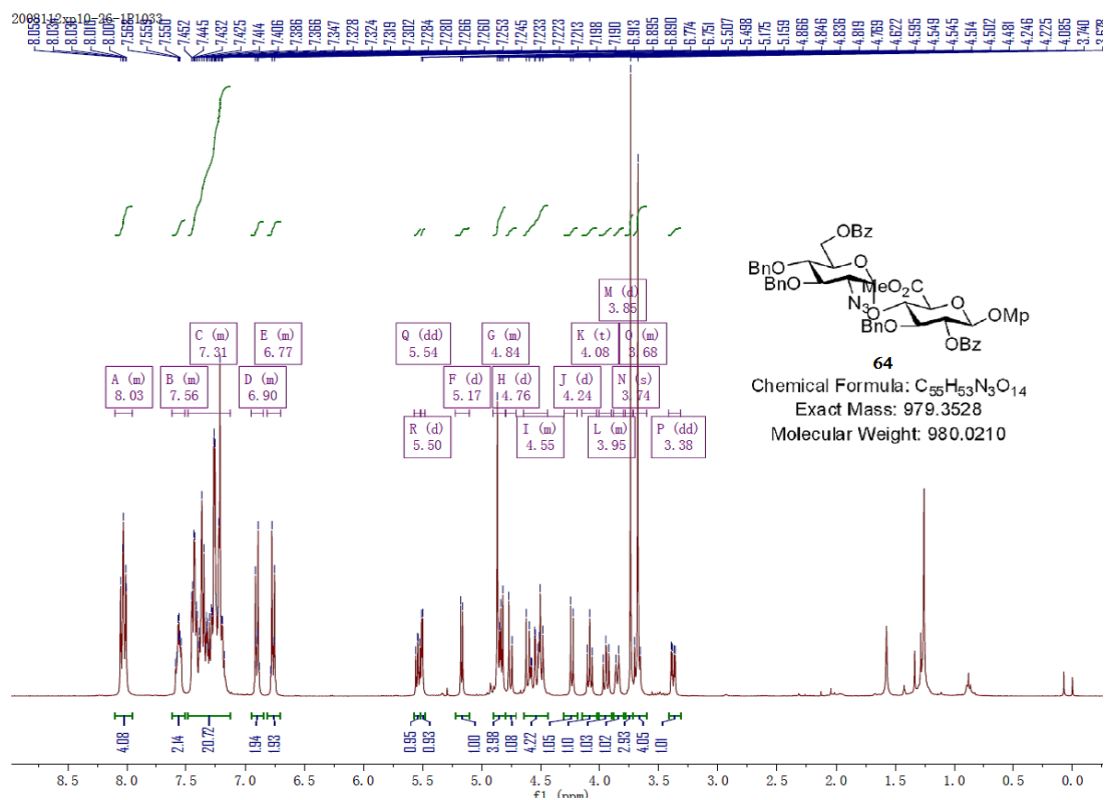

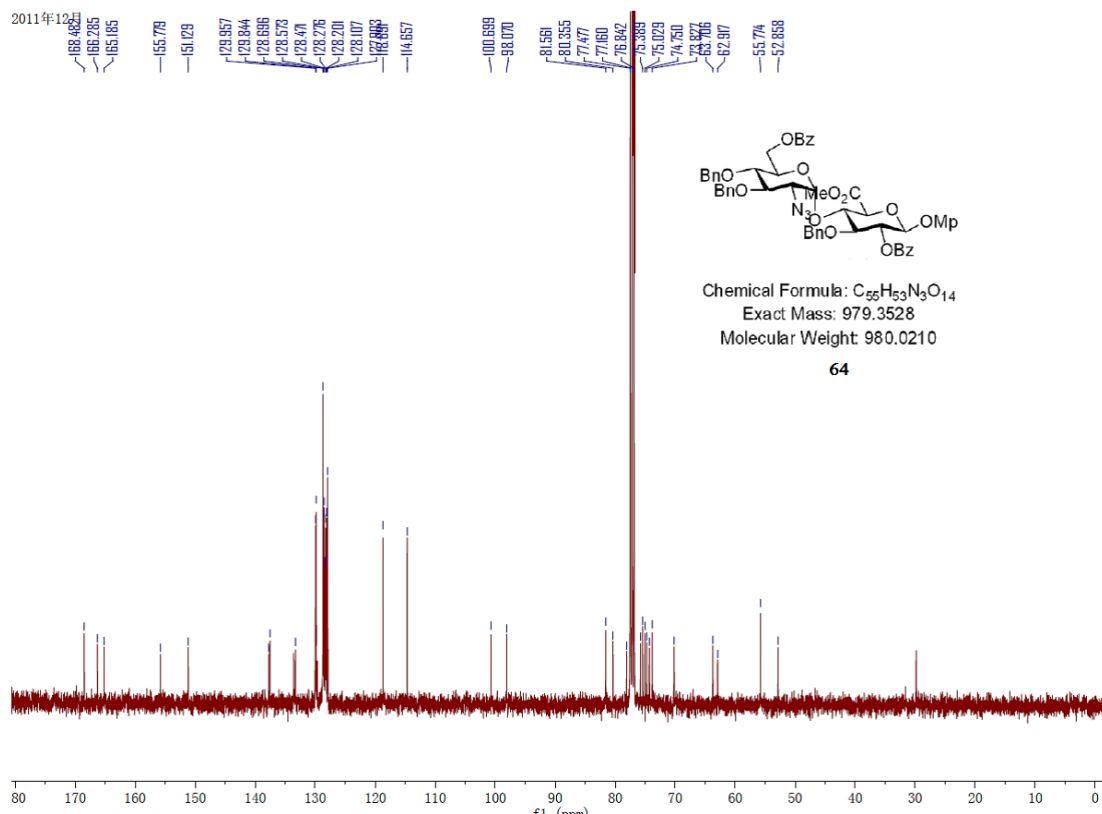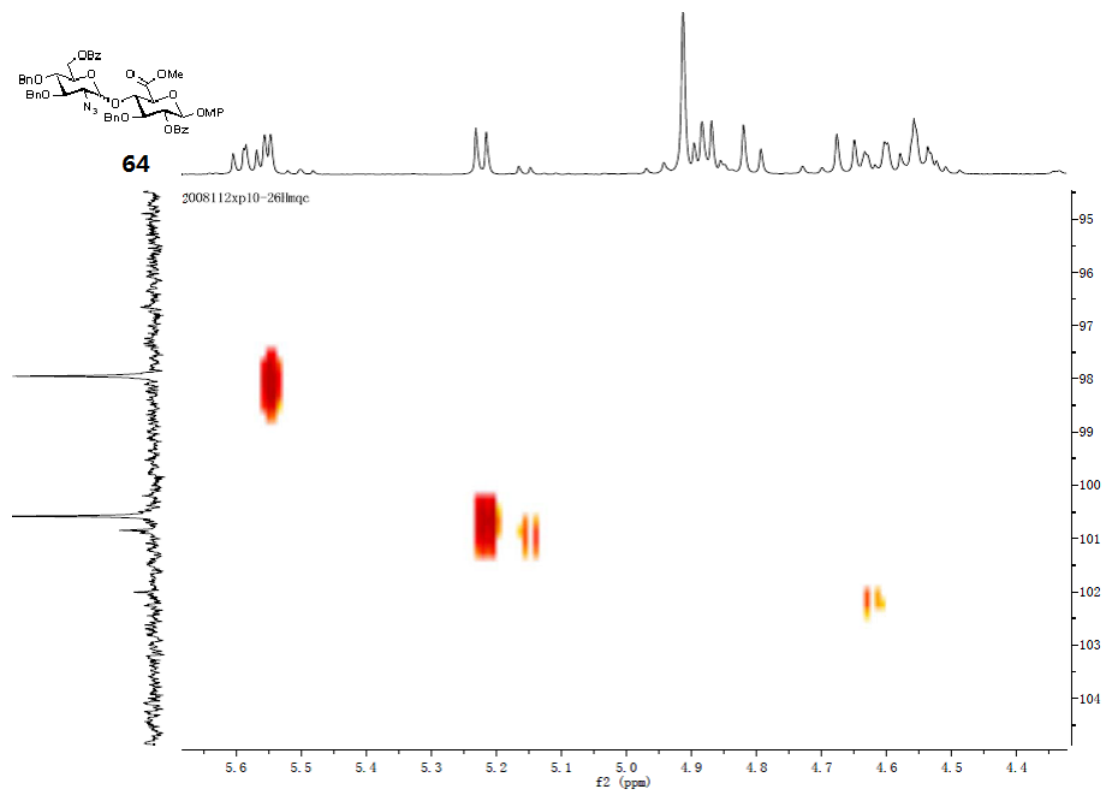

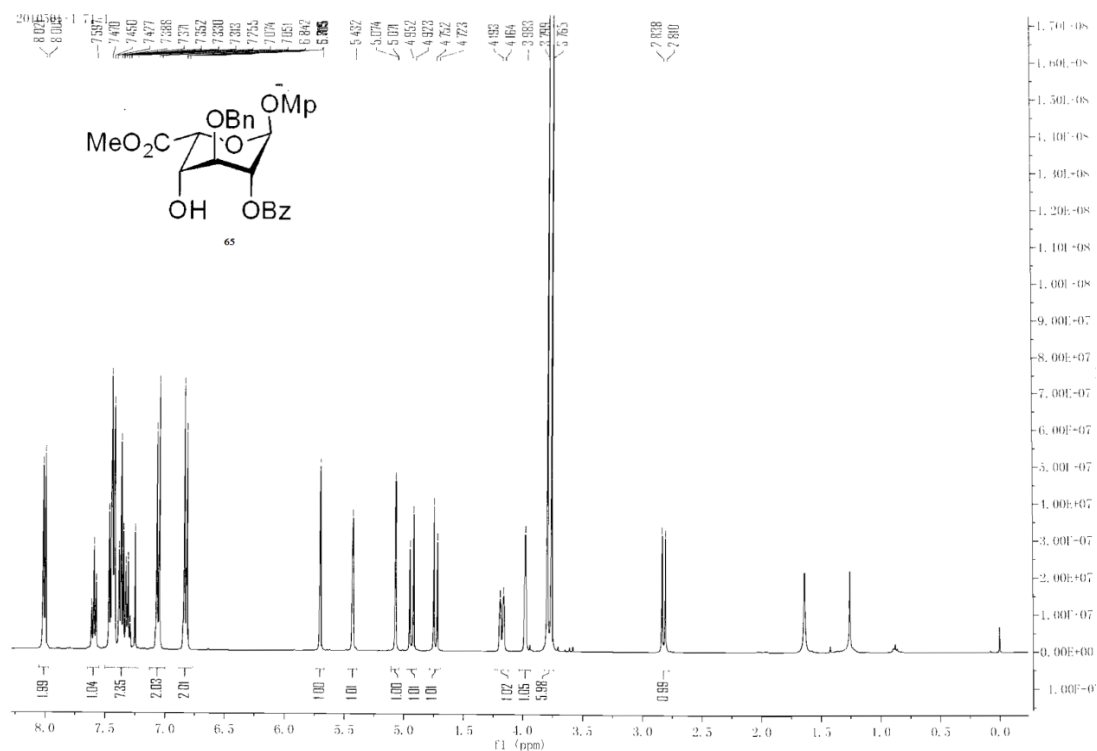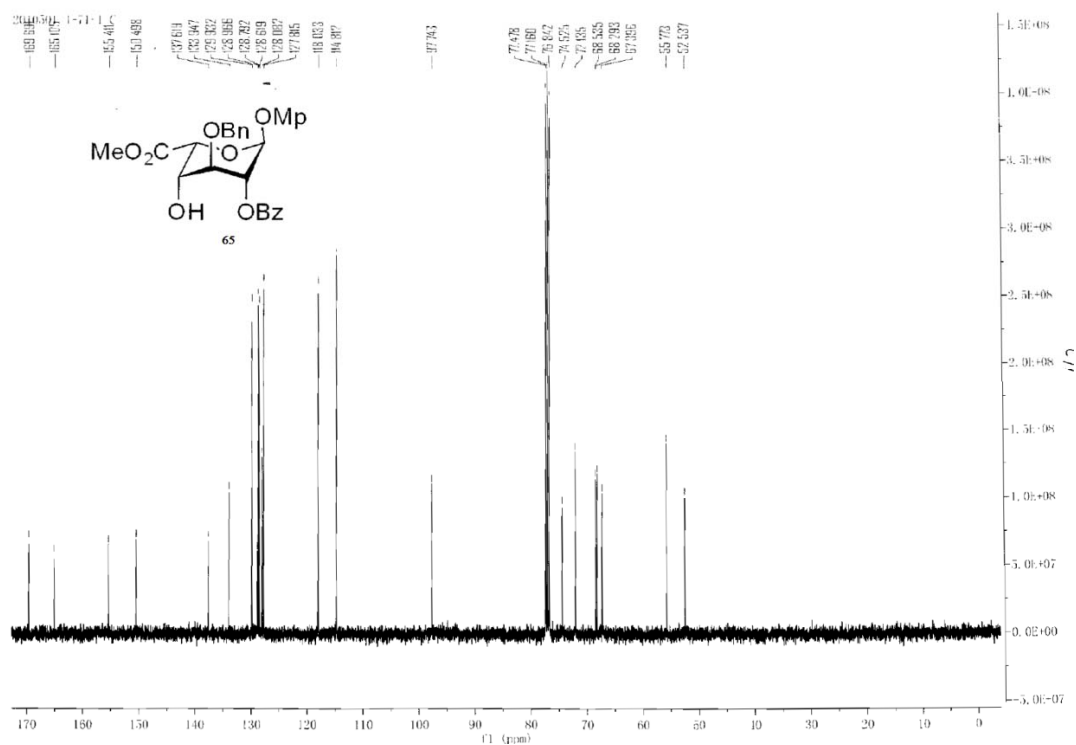

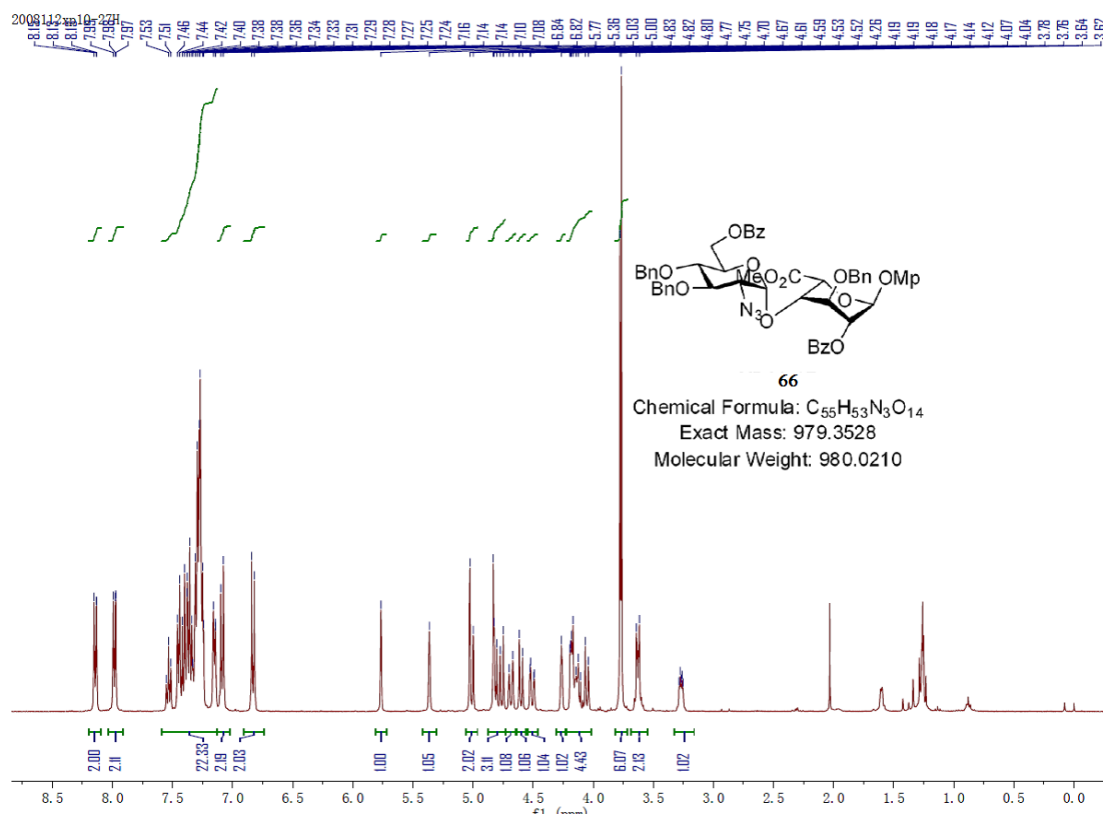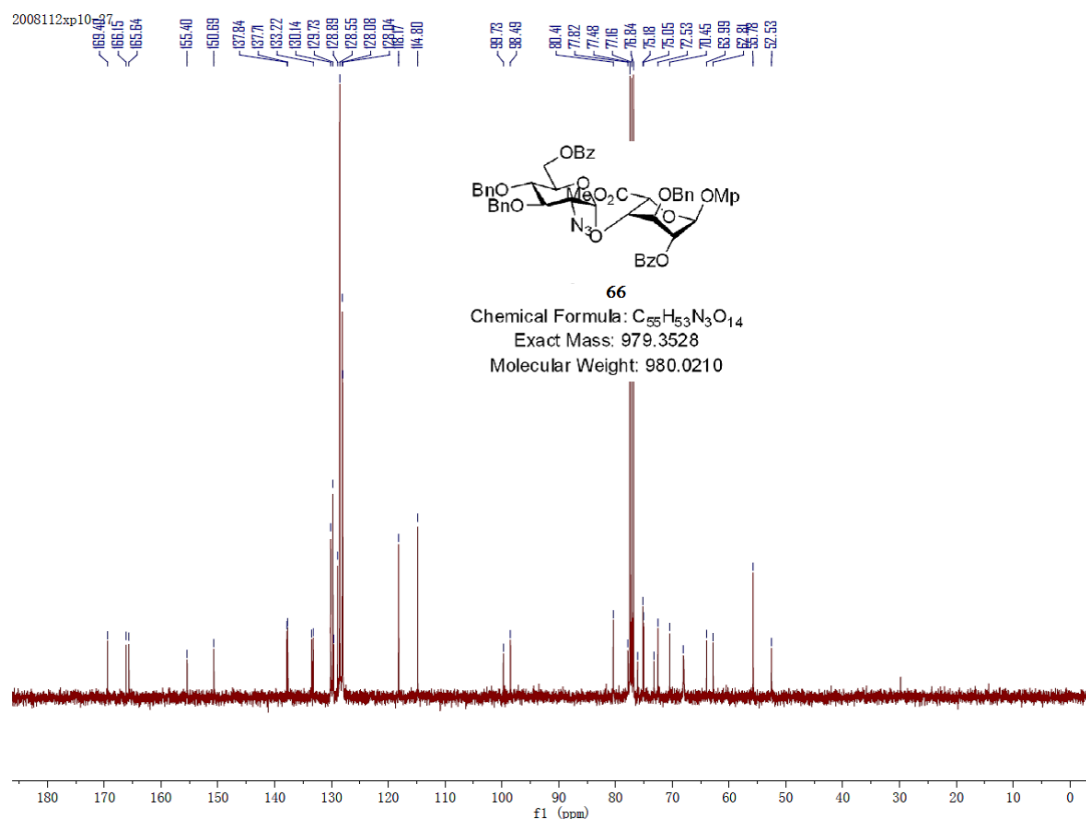

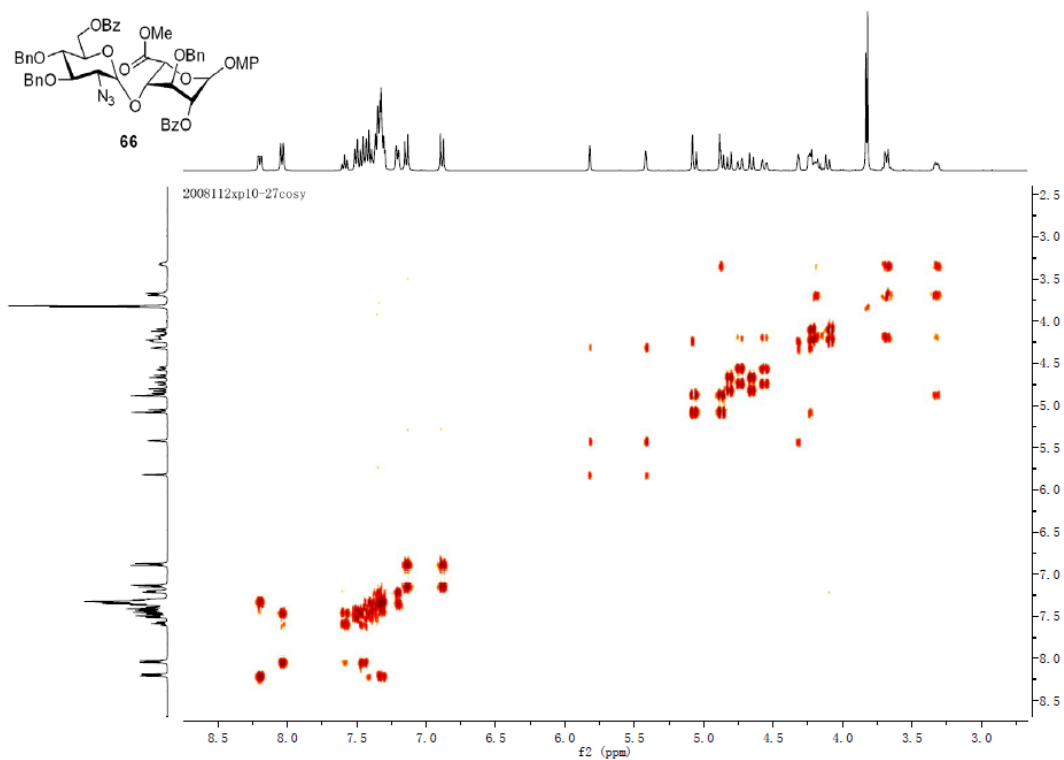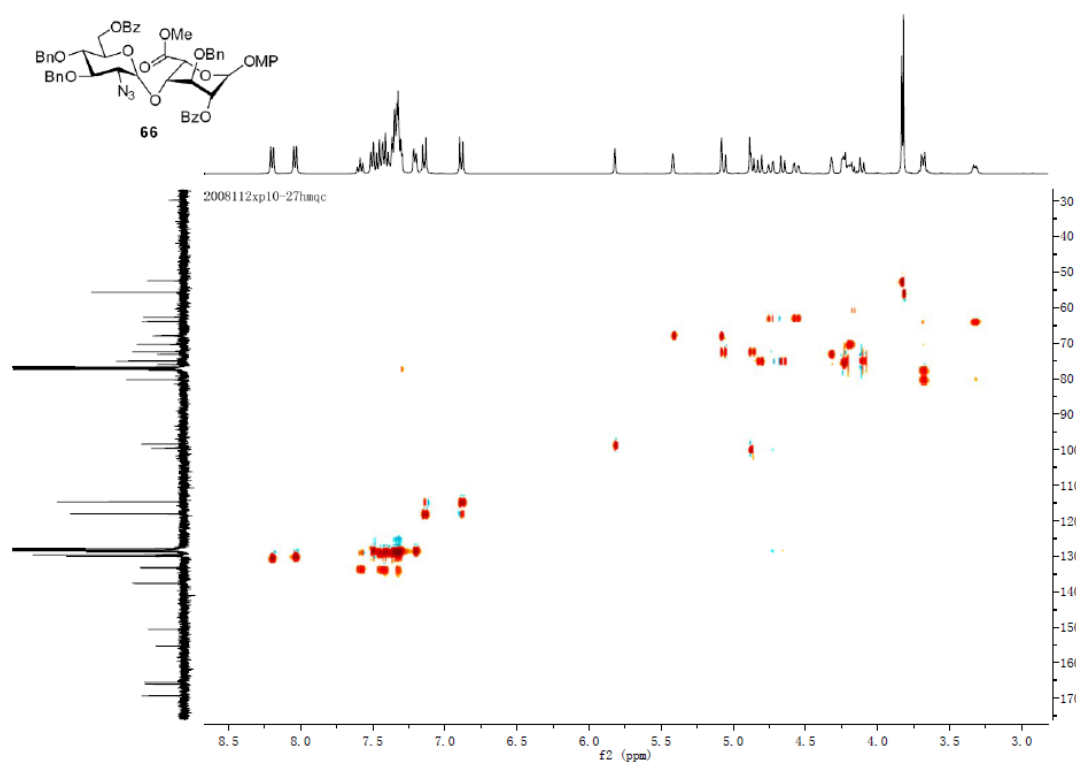

20081112  
7.173, 7.145, 7.108, 7.098, 7.058, 7.038, 7.018, 7.002, 6.982, 6.962, 6.942, 6.922, 6.902, 6.882, 6.862, 6.842, 6.822, 6.802, 6.782, 6.762, 6.742, 6.722, 6.702, 6.682, 6.662, 6.642, 6.622, 6.602, 6.582, 6.562, 6.542, 6.522, 6.502, 6.482, 6.462, 6.442, 6.422, 6.402, 6.382, 6.362, 6.342, 6.322, 6.302, 6.282, 6.262, 6.242, 6.222, 6.202, 6.182, 6.162, 6.142, 6.122, 6.102, 6.082, 6.062, 6.042, 6.022, 6.002, 5.982, 5.962, 5.942, 5.922, 5.902, 5.882, 5.862, 5.842, 5.822, 5.802, 5.782, 5.762, 5.742, 5.722, 5.702, 5.682, 5.662, 5.642, 5.622, 5.602, 5.582, 5.562, 5.542, 5.522, 5.502, 5.482, 5.462, 5.442, 5.422, 5.402, 5.382, 5.362, 5.342, 5.322, 5.302, 5.282, 5.262, 5.242, 5.222, 5.202, 5.182, 5.162, 5.142, 5.122, 5.102, 5.082, 5.062, 5.042, 5.022, 5.002, 4.982, 4.962, 4.942, 4.922, 4.902, 4.882, 4.862, 4.842, 4.822, 4.802, 4.782, 4.762, 4.742, 4.722, 4.702, 4.682, 4.662, 4.642, 4.622, 4.602, 4.582, 4.562, 4.542, 4.522, 4.502, 4.482, 4.462, 4.442, 4.422, 4.402, 4.382, 4.362, 4.342, 4.322, 4.302, 4.282, 4.262, 4.242, 4.222, 4.202, 4.182, 4.162, 4.142, 4.122, 4.102, 4.082, 4.062, 4.042, 4.022, 4.002, 3.982, 3.962, 3.942, 3.922, 3.902, 3.882, 3.862, 3.842, 3.822, 3.802, 3.782, 3.762, 3.742, 3.722, 3.702, 3.682, 3.662, 3.642, 3.622, 3.602, 3.582, 3.562, 3.542, 3.522, 3.502, 3.482, 3.462, 3.442, 3.422, 3.402, 3.382, 3.362, 3.342, 3.322, 3.302, 3.282, 3.262, 3.242, 3.222, 3.202, 3.182, 3.162, 3.142, 3.122, 3.102, 3.082, 3.062, 3.042, 3.022, 3.002, 2.982, 2.962, 2.942, 2.922, 2.902, 2.882, 2.862, 2.842, 2.822, 2.802, 2.782, 2.762, 2.742, 2.722, 2.702, 2.682, 2.662, 2.642, 2.622, 2.602, 2.582, 2.562, 2.542, 2.522, 2.502, 2.482, 2.462, 2.442, 2.422, 2.402, 2.382, 2.362, 2.342, 2.322, 2.302, 2.282, 2.262, 2.242, 2.222, 2.202, 2.182, 2.162, 2.142, 2.122, 2.102, 2.082, 2.062, 2.042, 2.022, 2.002, 1.982, 1.962, 1.942, 1.922, 1.902, 1.882, 1.862, 1.842, 1.822, 1.802, 1.782, 1.762, 1.742, 1.722, 1.702, 1.682, 1.662, 1.642, 1.622, 1.602, 1.582, 1.562, 1.542, 1.522, 1.502, 1.482, 1.462, 1.442, 1.422, 1.402, 1.382, 1.362, 1.342, 1.322, 1.302, 1.282, 1.262, 1.242, 1.222, 1.202, 1.182, 1.162, 1.142, 1.122, 1.102, 1.082, 1.062, 1.042, 1.022, 1.002, 0.982, 0.962, 0.942, 0.922, 0.902, 0.882, 0.862, 0.842, 0.822, 0.802, 0.782, 0.762, 0.742, 0.722, 0.702, 0.682, 0.662, 0.642, 0.622, 0.602, 0.582, 0.562, 0.542, 0.522, 0.502, 0.482, 0.462, 0.442, 0.422, 0.402, 0.382, 0.362, 0.342, 0.322, 0.302, 0.282, 0.262, 0.242, 0.222, 0.202, 0.182, 0.162, 0.142, 0.122, 0.102, 0.082, 0.062, 0.042, 0.022, 0.002

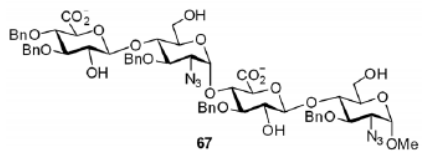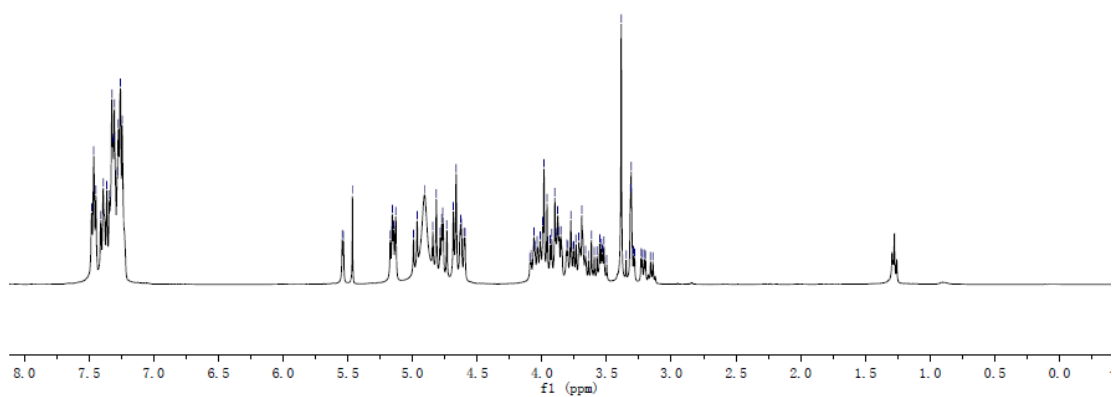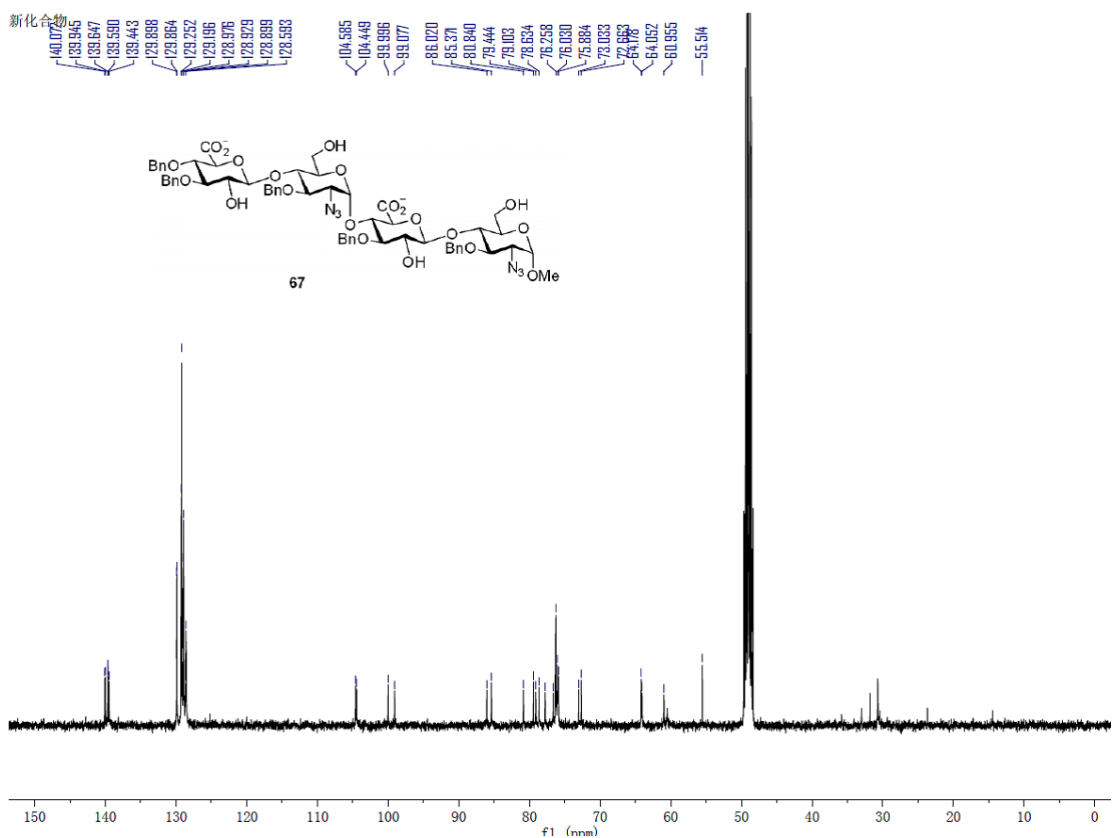

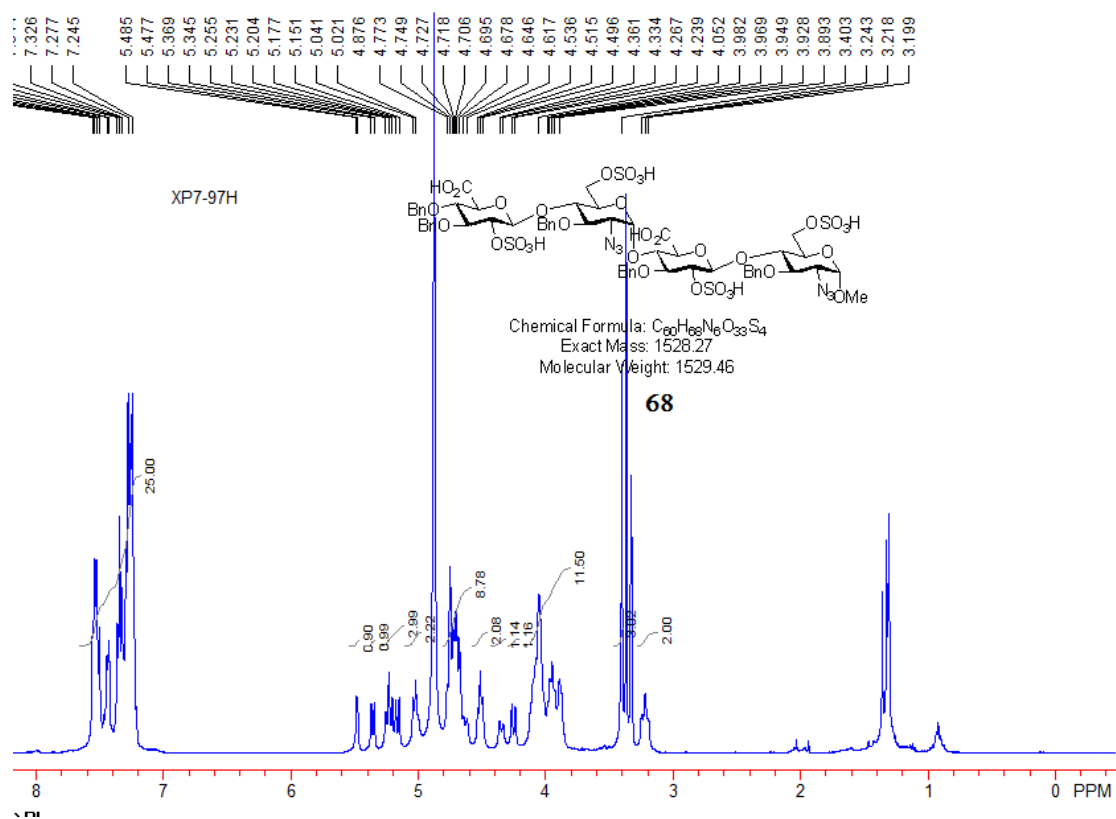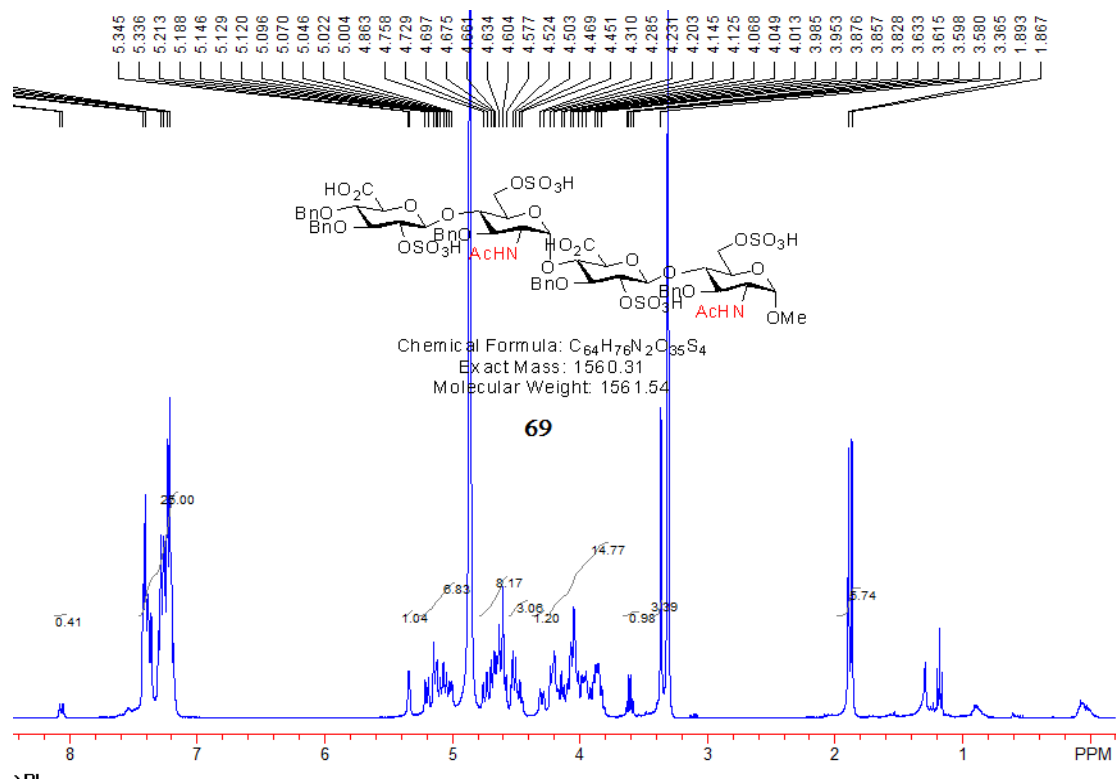

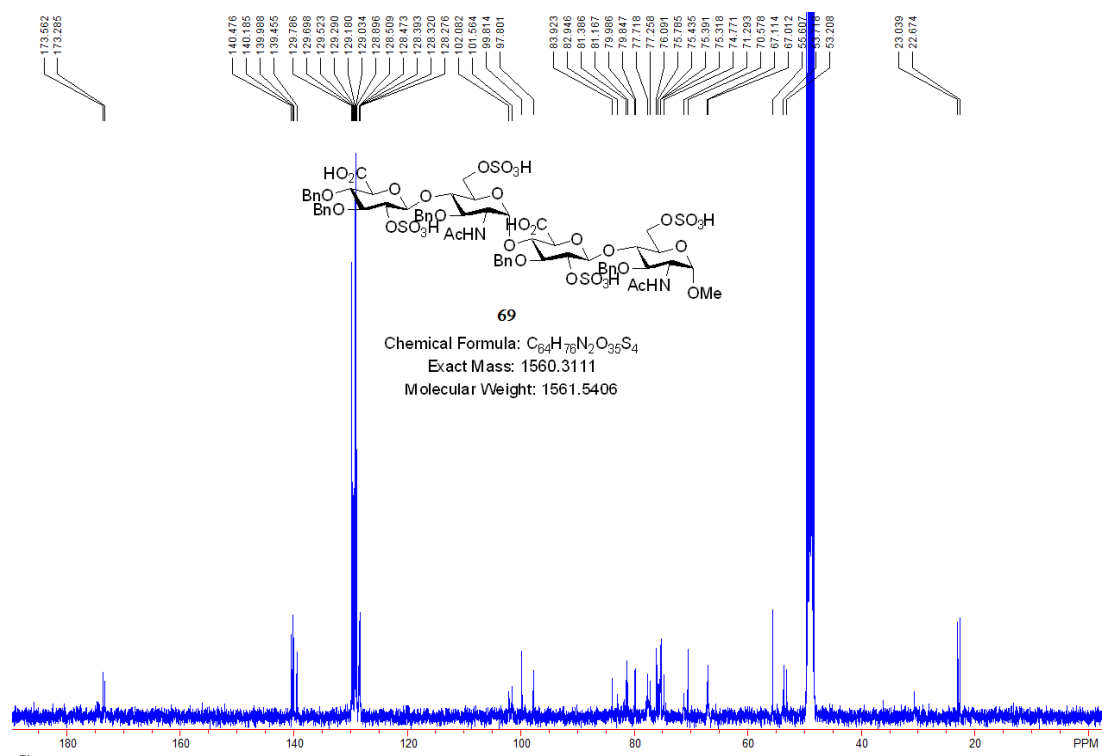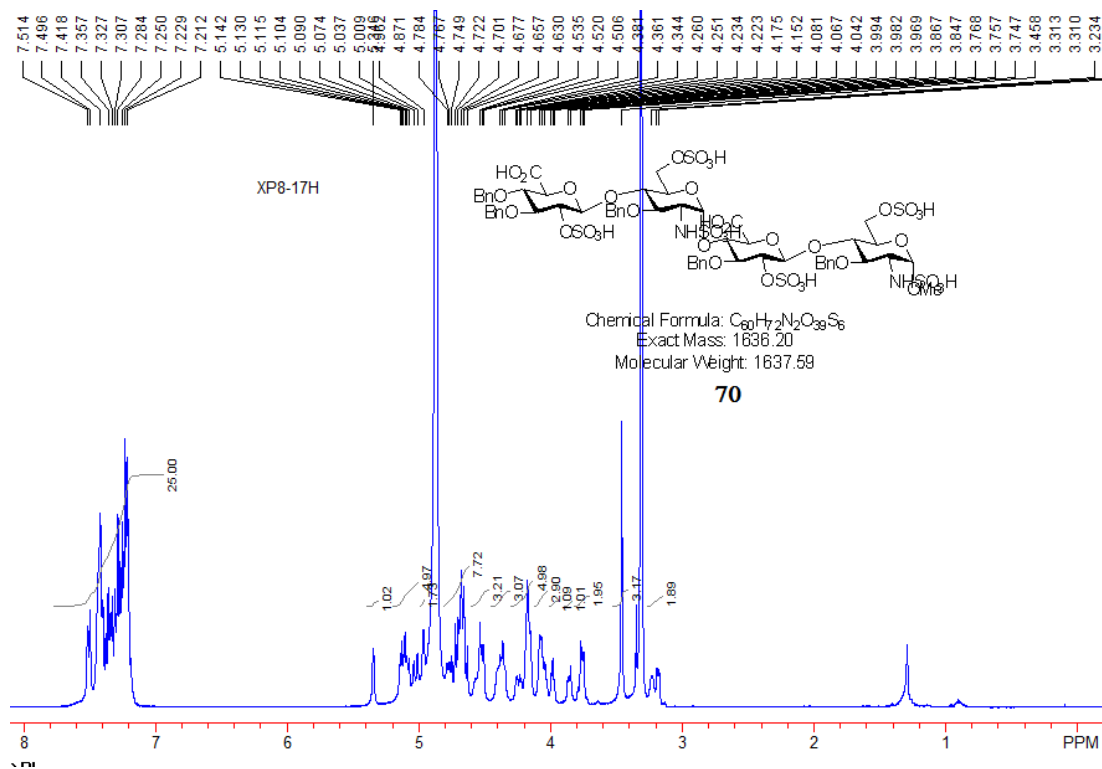

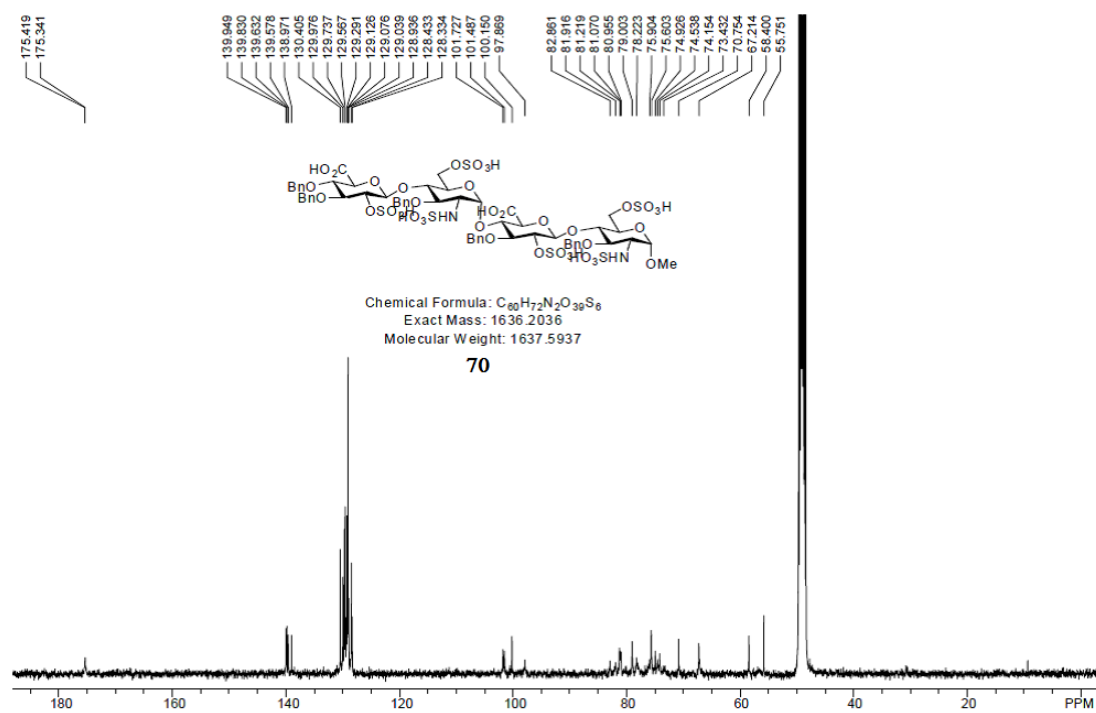

Supplement: c4qo00039k1.pdf [file c4qo00039k1.pdf]
